# Supplementary material for: 5-Hydroxymethylcytosine Signatures in Circulating Cell-Free DNA as Early Warning Biomarkers for COVID-19 Progression and Myocardial Injury
Source: Front Cell Dev Biol. 2022 Jan 6;9:781267. doi: 10.3389/fcell.2021.781267 (PMC8770986; doi:10.3389/fcell.2021.781267)
Supplement: Supplementary file 3 [file Table1.XLS]

## Sheet: reads.stat
samples	total reads	unique reads	reads on peaks	total peaks_number	peaks with enhancer number
CL1	18830500	15757997	1298325	55292	6863
CL10	17500922	14687831	381573	28178	3363
CL12	18732743	15385682	150095	14045	1822
CL13	13280924	11033986	477176	31372	3678
CL14	18880413	15734573	308549	22772	2651
CL15	12358022	10142384	65121	12249	1401
CL16	15217293	12376266	97463	8779	851
CL2	22037741	18507452	3877569	102496	12722
CL29	18727038	14961692	54751	10567	661
CL3	19038574	15958847	1884589	68212	8674
CL30	22958179	19141295	656889	33688	4523
CL31	14948410	12382713	619070	33248	4333
CL32	25110212	20623797	599096	29692	4303
CL33	27553793	23043613	2575060	74955	9959
CL34	16626546	13879389	762782	39201	4829
CL36	20296265	16922027	1891596	68471	8321
CL37	22026035	17944350	403283	18277	2327
CL38	22308685	18436432	255045	19862	2586
CL39	21587344	17756140	77371	7818	1146
CL40	23187266	18916280	85819	8120	1024
CL41	20085535	16389648	90212	8500	1033
CL43	17056562	14011853	224877	17618	2250
CL44	18480425	15058865	81128	13277	1057
CL45	27377096	23000103	2745882	87456	10190
CL69	20189431	16293232	94876	9342	1191
CL71	22141644	18277949	166385	14660	1749
CL73	19741185	15842733	35338	7087	644
CL75	20244658	16465265	96396	8158	838
CL76	26274665	21381550	107216	9679	1096
CL77	20739529	17398992	820357	40296	4990
CL78	26497938	21543690	130811	11759	1441
CL79	24325388	19918610	75071	7131	919
CL80	28379135	23142372	81687	8080	928
CL81	21788304	17708440	68729	6671	880
CL82	22812816	18646510	85926	13654	1123
CL83	18467141	14963869	53213	4300	518
CL84	36224154	29608807	50341	4928	643
CL91	26014935	21083823	112971	6403	873
CL96	19368860	15491593	57576	1952	179
Con1	19898356	16520130	605802	32908	3994
Con10	24725330	20613505	632720	35157	4541
Con15	18201789	15200193	1493979	63535	8049
Con16	15738833	13314576	1297003	59110	7029
Con17	22491622	18793926	533336	35406	4292
Con18	21429609	18023167	486214	32432	4241
Con2	15048906	12707140	1864701	68845	8643
Con20	17859154	14598134	782615	34969	4390
Con5	21213314	17747318	2091457	74453	9445
Con6	24797048	20825938	5984900	144262	17189
Con8	23972868	19946069	782652	40270	5293
SEQF5481	16027206	13248341	540996	29307	4483
SEQF5482	15838146	13208130	782618	37756	5040
SEQF5483	17077229	14192137	1403778	60345	8011
SEQF5484	16604294	13722634	708268	37231	5254
SEQF5485	15432165	12911803	1763734	62058	9344
SEQF5487	18155366	15286789	3513091	108283	13706
SEQF5488	16332554	13722268	2532077	83355	11030
SEQF5490	15652936	12980842	898150	38508	4505
SEQF5491	16985814	14219139	1466833	55304	7169
SEQF5504	14282377	11904904	1252525	49545	6791
SEQF5505	15927648	13531208	2872739	93097	11052
SEQF5506	18620291	15504617	2426668	83745	11157
SEQF5507	18285520	15199792	2615204	87619	11858
SEQF5508	17189220	14285709	1917366	70615	9262
SEQF5509	16344940	13636399	676920	35722	4215
SEQF5511	18415703	14811575	2478097	92264	10068
SEQF5512	14183266	11692264	844990	40815	5596
SEQF5515	15090549	12537637	2038549	83703	10242
SEQF5518	13376677	11204062	1481894	67149	8525
SEQF5520	14758285	12337985	1171828	56479	6560
SEQF5521	15183239	12736843	1797755	76744	9130
SEQF5522	16783923	13869180	1081972	42257	5699
SEQF5523	13706297	11599837	735331	44914	5040
SEQF5525	14574087	12244017	966085	48051	6066
SEQF5526	16566113	13822662	2396623	88473	10298
SEQF5528	14764728	12381687	1928477	79433	9429
SEQF5529	14929552	12366966	402161	24849	3276
SEQF5530	17911232	15056825	2080657	75371	9457
SEQF5532	15816605	13132273	1356257	53106	6739
SEQF5535	19717043	16399099	2835467	92515	11995
SEQF5541	15670066	13056940	2589685	95640	11553
SEQF5542	15651230	13141566	1804210	65784	9408
SEQF5544	19316928	16295430	3023464	104731	12276
SEQF5546	21540431	18084405	1221686	49050	5979
SEQF5548	17122613	14206093	1943908	86300	9822
SEQF5553	20004309	16908502	2846685	91244	11168
SEQF5555	20404755	16965324	2678935	85504	11467
SEQF5557	16677156	13899398	1385752	59889	7846
SEQF5558	14121597	11823875	1654711	68518	9162
SEQF5559	20414212	17131520	1637307	60225	8687
SEQF5560	22183341	18617611	977683	46853	6704
SEQF5561	20888894	17366999	2074728	70992	8856
SEQF5562	22697863	18862101	3684934	105731	13761
SEQF5565	15103128	12567950	865551	43430	5909
SEQF5566	17192358	14416027	2717525	91989	11400
SEQF5568	14594898	12088125	2669297	79635	10298
SEQF5569	17466636	14535909	2667583	86324	11334
SEQF5571	14802451	12491267	2041406	77332	9203
SEQF5572	16043943	13316155	2093188	72147	10100
SEQF5574	15530792	12763935	578026	36428	5503
SEQF5575	15602335	13126723	1210572	54126	7410
SEQF5576	15939246	13272617	837736	42208	6058
SEQF5577	18110734	15010516	1645200	62773	7513
SEQF5578	14615578	12231283	1262440	54868	7116
SEQF5579	17903375	15028951	2509169	85488	11599
SEQF5580	14648095	12283177	1391281	60624	7414
SEQF5581	17381751	14602504	2171870	83720	9836
SEQF5582	14958152	12507452	884909	42826	5471
SEQF5583	15496063	12832219	742726	38631	5856
SEQF5584	18525904	15709021	3050915	99170	11489
SEQF5585	15215134	12828894	850187	43127	5731
SEQF5587	26594548	22379633	3534122	109354	12920
SEQF5588	23801309	19879688	2521858	81009	10587
SEQF5710	14731009	12350017	773917	38658	5705
SEQF5711	14341720	12114469	1786585	67950	8941
SEQF5712	14543356	12374917	1332311	59338	7310
SEQF5723	14261083	11904044	1475951	62555	8618
SEQF5760	18180172	14934312	1978165	73528	6918
SEQF5761	16878869	13938716	845927	36785	3976
SEQF5762	19267935	15852161	1920509	87456	10907
SEQF5763	16469847	13704573	904377	44414	5551
SEQF5764	18473520	15346537	2240650	76519	9741
SEQF5765	17786886	15156650	3190608	103078	12426
SEQF5766	16939848	14387652	2570623	87267	11514
SEQF5767	18475396	15196240	1729052	72040	9253
SEQF5768	17054639	14243628	1828094	65588	9147
SEQF5769	20085661	16764077	1261207	53688	6511
SEQF5770	16545890	13834374	1433470	54191	7602
SEQF5771	18485035	15420041	1297428	51431	6717
SEQF5772	18191663	15120688	1297003	50784	7208
SEQF5773	17915674	15163136	2858813	93099	11344
SEQF5774	17673403	14914600	1859161	68996	8820
SEQF5775	19388736	16551808	2839311	100240	11807
SEQF5776	18108552	15243866	1151955	52114	7029
SEQF5777	18959427	16069996	2343774	81370	10886
SEQF5778	19113974	15857684	2081857	89552	9882
SEQF5779	19111927	16067098	1601366	60897	8168
SEQF5780	18979363	16013791	1518566	59640	7943
SEQF5781	18468332	15443994	658577	34387	4178
SEQF5782	14134003	11980226	1169444	54705	6498
SEQF5783	19204005	16106869	1125523	51864	6858
SEQF5784	16609039	14016683	1248556	57370	7071
SEQF5785	15847780	13288386	1598182	59413	8662
SEQF5786	14370119	12138904	1328309	58803	6993
SEQF5787	16583904	13996258	1586066	68219	8343
SEQF5788	17308897	14604438	1723505	70591	9292
SEQF5789	15075804	12846561	1039313	52249	5628
SEQF5790	14087154	11882648	1434626	62469	7831
SEQF5791	16995457	14371039	3198814	102848	12046
SEQF5792	14509353	12282781	1326353	60257	7480
SEQF5793	18380873	15212601	1199296	50836	5283
SEQF5794	14585837	12350316	1046805	51417	6137
SEQF5795	16000817	13521549	1177852	54674	6714
SEQF5796	16426781	14164597	944614	48166	5204
SEQF5797	14953186	12537732	2109533	82017	9942
SEQF5798	13622880	11757271	1341762	62865	6328
SEQF5799	14607481	12275515	1049145	47534	6549
SEQF5800	13936321	11905351	1105982	53029	6307
SEQF5801	15329143	12710605	812415	35263	4152
SEQF5802	15807048	13409036	824134	41031	4954
SEQF5803	15084322	11864363	1167323	56840	6064
SEQF5804	14307924	12305412	843522	44105	4598
SEQF5805	16728465	14265745	568907	31823	3786
SEQF5806	16041389	13431660	1398435	59785	7461
SEQF5807	17043075	14256318	483858	26761	4229
SEQF5810	24030909	20137339	5647723	140190	17078
SEQF5811	17187588	14416313	1923846	72006	9122
SEQF5812	18139885	15175283	1449827	56446	6825
SEQF5813	19715763	16782281	3082394	100384	11632
SEQF5814	15676395	13128993	1157162	51516	7375
SEQF5815	17032289	14390103	1816842	67972	8259
SEQF5816	17190561	14634835	2520193	88307	10691
SEQF5817	18135432	15427791	2030047	76363	9095
SEQF5818	17416586	14983444	1487717	60043	6445
SEQF5820	27049862	22608812	2590008	94395	10929
SEQF5821	18348725	15228257	331575	19281	2578
SEQF5822	20297581	17283861	2715632	97103	10856
SEQF5823	18194640	15344897	1448968	58538	6813
SEQF5824	16870306	14192586	2098247	72548	9288
SEQF5825	19911329	16892138	2847523	96854	11702
SEQF5826	19375768	16510737	1820569	58001	8324
SEQF5827	19065830	16084424	2210701	76948	9826
SEQF5828	19773730	16848949	1136736	52583	6080
SEQF5829	18133260	15193774	1219515	53122	6812
SEQF5830	19261704	16308742	1558693	60863	7407
SEQF5831	19122554	16201940	2001164	72115	8943
SEQF5832	19177033	15985978	1541323	62110	7720
SEQF5833	21810060	18487980	2804489	92252	10918
SEQF5834	19004133	15902754	652918	33815	3431
SEQF5836	13703694	11649876	354074	27137	2911
SEQF5838	16424014	13955126	1842428	67506	8497
SEQF5840	14152739	11925796	430107	26250	3733
SEQF5842	16054421	13532611	615621	33351	4497
SEQF5845	14774243	12490221	920290	44253	5641
SEQF5846	14855249	12475827	963541	45422	5811
SEQF5848	18379339	15619342	3428953	110363	12141
SEQF5849	16465163	14079762	1860220	68976	8400
SEQF5850	18822146	15867393	1826484	66262	8689
SEQF5851	15244243	12720423	456220	30004	4079
SEQF5852	18759183	15521667	755365	32343	4011
SEQF5853	16580059	13929805	1111277	50369	6298
SEQF5854	16701354	14074867	1717732	68276	9274
SEQF5855	15792147	13257689	955533	44307	5578
SEQF5856	15443003	13099769	1207883	54071	6903
SEQF5857	15497886	13135628	777732	40125	5132
SEQF5858	19430442	16557390	2228763	82299	10425
SEQF5859	16522472	14002272	706112	38034	4545
SEQF5860	17417585	14788084	1321488	54323	6609
SEQF5861	19521935	16756117	2265033	81749	8792
SEQF5862	19378418	16706885	1970578	75484	7977
SEQF5863	18103187	15276552	1010182	43228	5747
SEQF5864	18653876	15948445	1516359	60643	6832
SEQF5865	17822969	14921494	961836	43947	5867
SEQF5866	19130474	16221418	1024028	48755	6208
SEQF5869	14807603	12124350	471968	32228	4601
SEQF5870	17317423	14359023	2192718	75275	10620
SEQF5871	16095785	13211846	1664827	64276	9201
SEQF5872	17482496	12855869	1899309	68838	8982
SEQF5876	17879299	15169527	2298641	85191	10136
SEQF5877	18590438	15641623	1968386	69263	10021
SEQF5878	18476078	15661527	2013379	73447	9125
SEQF5879	17092345	13937484	136062	12820	2083
SEQF5979	19542598	16343340	1700057	63880	8558
SEQF5980	18364965	15416337	1595611	60769	8383
SEQF5982	16592018	13946087	1802787	66985	8447
SEQF5983	17983748	14981376	1778949	64094	9021
SEQF5984	20498854	17137838	3651256	116905	13979
SEQF5985	18215324	15254062	1831573	68358	9376
SEQF5986	19690792	16692443	3661873	120375	13477
SEQF5987	17996449	14820257	1608432	61923	9143
SEQF5989	15319208	12782681	1246817	55916	7382
SEQF5994	18216729	15241742	3329064	112669	13755
SEQF5997	17205824	14384447	1797254	69683	9330
SEQF5999	19135277	16094396	1814464	68693	8446
SEQF6000	18262693	15274403	1443576	61762	7791
SEQF6001	19769195	16460223	4478502	126052	16478
SEQF6002	20025681	17069768	4013838	124583	14364
SEQF6003	20001136	16881454	2322616	81559	10087
SEQF6004	17249619	14486013	1235178	56645	7448
SEQF6005	16916013	14276279	2379695	85545	9680
SEQF6006	19331891	16460848	2716313	95396	11210
SEQF6007	18654984	15506291	1633367	60119	7882
SEQF6008	18112701	15261578	987733	42298	5340
SEQF6009	17291712	14563827	1430177	55443	6730
SEQF6010	18095372	15304513	1945228	71059	9025
SEQF6011	19400642	15975652	483825	26594	4128
SEQF6012	17711261	14781639	1226642	49575	6459
SEQF6013	16607364	14099404	1515581	60377	7793
SEQF6014	18776683	15619076	2530864	81262	11632
SEQF6015	17445583	14414693	1079697	47630	7584
SEQF6016	17739657	14940145	811656	36032	4654
SEQF6017	19046884	16108980	2530008	86436	10878
SEQF6018	16908071	13511863	1076765	48108	6678
SEQF6019	19688247	16539543	3498050	114858	13705
SEQF6020	16586723	13624523	1570971	59040	6869
SEQF6022	17875052	14863206	1094911	44791	6029
