# Supplementary material for: 5-Hydroxymethylcytosine Signatures in Circulating Cell-Free DNA as Early Warning Biomarkers for COVID-19 Progression and Myocardial Injury
Source: Front Cell Dev Biol. 2022 Jan 6;9:781267. doi: 10.3389/fcell.2021.781267 (PMC8770986; doi:10.3389/fcell.2021.781267)
Supplement: Supplementary file 6 [file Table3.CSV]

seqnames	start	end	width	strand	log2FoldChange	pvalue	padj	annotation	geneChr	geneStart	geneEnd	geneLength	geneStrand	geneId	transcriptId	distanceToTSS	ENSEMBL	SYMBOL	GENENAME
chr15	49851618	49852374	757	*	1.068871762	1.10E-09	1.79E-05	Intron (uc001zxl.2/196951, intron 9 of 15)	15	49714712	49913051	198340	2	196951	uc001zxm.3	60677	ENSG00000166262	FAM227B	family with sequence similarity 227 member B
chr8	19821150	19821596	447	*	1.031383511	1.07E-06	0.000693708	Intron (uc003wzk.4/4023, intron 9 of 9)	8	19796582	19824770	28189	1	4023	uc003wzk.4	24568	ENSG00000175445	LPL	lipoprotein lipase
chr14	30996390	30996826	437	*	1.028677746	5.66E-06	0.001624403	Distal Intergenic	14	31028329	31077275	48947	1	55632	uc010tpe.1	-31503	ENSG00000092140	G2E3	G2/M-phase specific E3 ubiquitin protein ligase
chr2	228745232	228745682	451	*	1.01119933	1.81E-06	0.000889524	Intron (uc002vpn.1/164781, intron 1 of 12)	2	228736327	228789026	52700	1	164781	uc010zlw.1	8905	ENSG00000123977	DAW1	dynein assembly factor with WD repeats 1
chr7	41394845	41395331	487	*	1.010734389	1.33E-06	0.000746239	Distal Intergenic	7	41733514	41752792	19279	1	285954	uc003ths.2	-338183	ENSG00000224116	INHBA-AS1	INHBA antisense RNA 1
chr5	124121851	124122273	423	*	0.99949485	3.44E-09	3.24E-05	Distal Intergenic	5	123982372	124084500	102129	2	57507	uc003ktt.1	-37351	ENSG00000168916	ZNF608	zinc finger protein 608
chr10	80371143	80371625	483	*	0.998463811	6.02E-08	0.00014511	Distal Intergenic	10	80027085	80159502	132418	1	414243	uc001jzw.2	344058	ENSG00000230417	LINC00595	long intergenic non-protein coding RNA 595
chr9	112078346	112078970	625	*	0.997887267	1.14E-09	1.79E-05	Intron (uc004bdz.1/54566, intron 1 of 25)	9	111934254	112083021	148768	2	54566	uc004bdz.1	4051	ENSG00000095203	EPB41L4B	erythrocyte membrane protein band 4.1 like 4B
chr2	98310400	98311030	631	*	0.986503513	1.51E-07	0.000221272	Intron (uc002syc.3/728537, intron 7 of 9)	2	98330031	98356323	26293	1	7535	uc002syd.1	-19001	ENSG00000115085	ZAP70	zeta chain of T cell receptor associated protein kinase 70
chr12	14744225	14744712	488	*	0.981764618	3.13E-08	9.21E-05	Distal Intergenic	12	14656597	14720791	64195	2	79887	uc001rcc.1	-23434	ENSG00000121316	PLBD1	phospholipase B domain containing 1
chr12	101821957	101822471	515	*	0.970273289	3.23E-07	0.000375664	Distal Intergenic	12	101786903	101801572	14670	2	400	uc010svo.2	-20385	ENSG00000120805	ARL1	ADP ribosylation factor like GTPase 1
chr17	68370487	68370948	462	*	0.96799887	1.40E-07	0.000213908	Distal Intergenic	17	68165676	68176183	10508	1	3759	uc002jir.3	204811	ENSG00000123700	KCNJ2	potassium inwardly rectifying channel subfamily J member 2
chr17	60998251	60998717	467	*	0.965635703	2.45E-09	2.68E-05	Distal Intergenic	17	61086898	61505067	418170	1	26115	uc002jal.4	-88181	ENSG00000170921	TANC2	tetratricopeptide repeat, ankyrin repeat and coiled-coil containing 2
chr18	1653891	1654277	387	*	0.957957128	2.07E-06	0.000977913	Distal Intergenic	18	1268312	1407181	138870	2	56651	uc002kld.1	-246710	NA	LINC00470	long intergenic non-protein coding RNA 470
chr15	94175412	94175973	562	*	0.957623018	6.78E-08	0.000151859	Distal Intergenic	15	93586636	93632443	45808	2	56963	uc002bss.2	-542969	ENSG00000182175	RGMA	repulsive guidance molecule BMP co-receptor a
chr15	38821798	38822338	541	*	0.956329522	3.71E-06	0.001309474	Intron (uc001zkd.4/10125, intron 2 of 15)	15	38780302	38811572	31271	2	10125	uc010bbg.3	-10226	ENSG00000172575	RASGRP1	RAS guanyl releasing protein 1
chr5	164723378	164723949	572	*	0.954356937	5.23E-07	0.000482188	Distal Intergenic	5	162944463	162946359	1897	1	27430	uc003lzm.4	1778915	ENSG00000038274	MAT2B	methionine adenosyltransferase 2B
chr19	43866758	43867470	713	*	0.942911708	5.90E-07	0.000508954	3' UTR	19	43857825	43867480	9656	1	57126	uc010eis.3	8933	ENSG00000204936	CD177	CD177 molecule
chr8	19687089	19687522	434	*	0.940174748	7.06E-09	4.43E-05	Intron (uc003wzj.3/55174, intron 9 of 16)	8	19674918	19709586	34669	1	55174	uc022asn.1	12171	ENSG00000104613	INTS10	integrator complex subunit 10
chr5	80213375	80213807	433	*	0.939015081	4.51E-07	0.000442817	Distal Intergenic	5	80256508	80525981	269474	1	5924	uc003kha.2	-42701	ENSG00000113319	RASGRF2	Ras protein specific guanine nucleotide releasing factor 2
chr7	41439865	41440450	586	*	0.938132588	7.13E-08	0.000152482	Distal Intergenic	7	41733514	41752792	19279	1	285954	uc003ths.2	-293064	ENSG00000224116	INHBA-AS1	INHBA antisense RNA 1
chr8	6833056	6833570	515	*	0.93280355	1.09E-06	0.000693708	Downstream (1-2kb)	8	6835171	6837614	2444	2	1667	uc003wqv.1	4044	ENSG00000206047	DEFA1	defensin alpha 1
chr5	43769497	43770075	579	*	0.929199806	5.67E-08	0.000144557	Distal Intergenic	5	43573287	43603332	30046	2	100652772	uc031sjh.1	-166165	NA	NNT-AS1	NNT antisense RNA 1
chr18	1617771	1618503	733	*	0.924773733	2.32E-05	0.003408107	Distal Intergenic	18	1268312	1407181	138870	2	56651	uc002kld.1	-210590	NA	LINC00470	long intergenic non-protein coding RNA 470
chr2	240574828	240575157	330	*	0.924472495	1.15E-07	0.00019965	Distal Intergenic	2	240684554	240722356	37803	1	150935	uc021vzc.2	-109397	NA	LOC150935	uncharacterized LOC150935
chr1	7527511	7528139	629	*	0.920917577	1.12E-10	3.96E-06	Exon (uc001aoi.3/23261, exon 6 of 23)	1	7732054	7805082	73029	1	23261	uc010nzv.1	-203915	ENSG00000171735	CAMTA1	calmodulin binding transcription activator 1
chr6	97578573	97578980	408	*	0.919684401	8.33E-07	0.000616065	Exon (uc003poz.2/114792, exon 7 of 9)	6	97458076	97588630	130555	1	114792	uc003ppa.2	120497	ENSG00000186231	KLHL32	kelch like family member 32
chr17	9764205	9765012	808	*	0.918179005	2.48E-07	0.000314948	Exon (uc002gmd.1/9340, exon 8 of 13)	17	9729381	9793022	63642	1	9340	uc002gmd.1	34824	ENSG00000065325	GLP2R	glucagon like peptide 2 receptor
chr1	39316977	39317537	561	*	0.9144778	3.97E-09	3.40E-05	Exon (uc001ccq.3/64121, exon 5 of 7)	1	39303869	39325495	21627	2	64121	uc001ccq.3	7958	ENSG00000116954	RRAGC	Ras related GTP binding C
chr5	59289103	59289460	358	*	0.910142084	0.000897761	0.022869942	Intron (uc003jsb.3/5144, intron 2 of 16)	5	58264866	59189621	924756	2	5144	uc003jsa.2	-99482	ENSG00000113448	PDE4D	phosphodiesterase 4D
chr8	121275105	121275650	546	*	0.905367369	8.49E-07	0.000616065	Exon (uc003yox.4/7373, exon 24 of 48)	8	121282274	121383155	100882	1	7373	uc003yoz.3	-6624	ENSG00000187955	COL14A1	collagen type XIV alpha 1 chain
chr8	116871908	116872479	572	*	0.905136322	5.61E-05	0.00550683	Distal Intergenic	8	116420724	116681228	260505	2	7227	uc010mcy.3	-190680	ENSG00000104447	TRPS1	transcriptional repressor GATA binding 1
chr7	77824599	77825144	546	*	0.904838231	1.87E-07	0.000265396	Intron (uc003ugx.3/9863, intron 11 of 21)	7	77976559	77988770	12212	1	399670	uc010ldz.3	-151415	ENSG00000231322	RPL13AP17	ribosomal protein L13a pseudogene 17
chr2	163783750	163784316	567	*	0.900149219	1.40E-06	0.000768268	Distal Intergenic	2	163279757	163695257	415501	2	90134	uc002uci.3	-88493	ENSG00000184611	KCNH7	potassium voltage-gated channel subfamily H member 7
chr7	48299247	48299662	416	*	0.894232317	3.88E-06	0.00133217	Intron (uc010kyr.2/154664, intron 16 of 17)	7	48317691	48666688	348998	1	154664	uc031sxg.1	-18029	ENSG00000179869	ABCA13	ATP binding cassette subfamily A member 13
chr2	170206225	170206705	481	*	0.887182293	1.04E-05	0.002208649	Intron (uc002ues.3/4036, intron 1 of 78)	2	169983619	170219122	235504	2	4036	uc002ues.3	12417	ENSG00000081479	LRP2	LDL receptor related protein 2
chr3	152485356	152485773	418	*	0.879655544	2.78E-05	0.003769403	Distal Intergenic	3	152552736	152555843	3108	1	5028	uc003ezq.3	-66963	ENSG00000169860	P2RY1	purinergic receptor P2Y1
chr12	4762930	4763650	721	*	0.878903067	3.52E-08	0.000100336	Exon (uc009zei.2/4704, exon 2 of 8)	12	4768192	4796720	28529	1	4704	uc010ses.2	-4542	ENSG00000139180	NDUFA9	NADH:ubiquinone oxidoreductase subunit A9
chr5	59367592	59368216	625	*	0.877820431	6.91E-06	0.001840555	Intron (uc003jsb.3/5144, intron 2 of 16)	5	58264866	59189621	924756	2	5144	uc003jsa.2	-177971	ENSG00000113448	PDE4D	phosphodiesterase 4D
chr7	149161281	149161811	531	*	0.874632349	6.14E-07	0.000512167	Distal Intergenic	7	149128454	149158053	29600	2	27153	uc003wfv.3	-3228	ENSG00000196453	ZNF777	zinc finger protein 777
chr5	55915481	55916120	640	*	0.873055289	4.56E-08	0.000122538	Distal Intergenic	5	56110900	56191978	81079	1	4214	uc003jqw.4	-194780	ENSG00000095015	MAP3K1	mitogen-activated protein kinase kinase kinase 1
chr1	98806043	98806493	451	*	0.870778389	1.15E-05	0.002322836	Distal Intergenic	1	98676267	98738214	61948	1	729987	uc031pnf.1	129776	ENSG00000226053	LINC01776	long intergenic non-protein coding RNA 1776
chr2	46198258	46198700	443	*	0.866815235	5.39E-07	0.000487433	Intron (uc002rut.3/5581, intron 2 of 14)	2	45903873	46072897	169025	1	5581	uc002ruu.3	294385	ENSG00000171132	PRKCE	protein kinase C epsilon
chr8	104626663	104627230	568	*	0.866647089	0.000149002	0.008917114	Intron (uc003ylp.3/9699, intron 1 of 23)	8	104512976	105266656	753681	1	9699	uc003ylp.3	113687	ENSG00000176406	RIMS2	regulating synaptic membrane exocytosis 2
chr10	105683271	105683662	392	*	0.864965789	3.52E-06	0.001272325	Distal Intergenic	10	105637318	105678045	40728	2	79991	uc001kxm.3	-5226	ENSG00000107960	STN1	STN1 subunit of CST complex
chr2	31147531	31148025	495	*	0.864024539	4.66E-07	0.000451626	Exon (uc002rnq.3/79623, exon 14 of 17)	2	30973969	31030311	56343	2	92291	uc002rnp.1	-117220	ENSG00000162949	CAPN13	calpain 13
chr3	47687808	47688249	442	*	0.86243686	1.71E-06	0.000873691	Intron (uc011bbc.1/6599, intron 7 of 13)	3	47627378	47721998	94621	2	6599	uc011bbc.1	33749	ENSG00000173473	SMARCC1	SWI/SNF related, matrix associated, actin dependent regulator of chromatin subfamily c member 1
chr2	103257321	103257878	558	*	0.8617299	1.03E-05	0.002199443	Intron (uc002tca.3/6549, intron 1 of 11)	2	103236166	103327809	91644	1	6549	uc002tca.3	21155	ENSG00000115616	SLC9A2	solute carrier family 9 member A2
chr9	88286313	88287075	763	*	0.860172617	2.81E-07	0.000348247	Intron (uc011ltc.2/23287, intron 3 of 13)	9	88161454	88296250	134797	2	23287	uc011ltc.2	9175	ENSG00000135049	AGTPBP1	ATP/GTP binding protein 1
chr2	55791423	55791913	491	*	0.858711745	9.23E-09	5.30E-05	Exon (uc002ryz.3/57223, exon 4 of 6)	2	55775514	55800913	25400	2	57223	uc002ryz.3	9000	ENSG00000275052	PPP4R3B	protein phosphatase 4 regulatory subunit 3B
chr7	132568631	132569105	475	*	0.856334802	6.98E-08	0.000152482	Intron (uc003vre.3/54927, intron 5 of 7)	7	132469623	132766828	297206	2	54927	uc003vre.3	197723	ENSG00000106554	CHCHD3	coiled-coil-helix-coiled-coil-helix domain containing 3
chr21	45805165	45805649	485	*	0.856205816	1.35E-05	0.002513899	Intron (uc002zet.1/7226, intron 10 of 32)	21	45811155	45862964	51810	1	7226	uc002zey.1	-5506	ENSG00000142185	TRPM2	transient receptor potential cation channel subfamily M member 2
chr15	41604779	41605267	489	*	0.855762622	3.90E-07	0.000426464	Intron (uc001znp.3/11339, intron 4 of 4)	15	41601466	41624819	23354	2	11339	uc001znp.3	19552	ENSG00000104147	OIP5	Opa interacting protein 5
chr9	21276039	21276628	590	*	0.85289402	1.12E-07	0.000198706	Promoter (1-2kb)	9	21277687	21278562	876	2	3453	uc003zou.1	1934	NA	IFNA22P	interferon alpha 22, pseudogene
chr3	32649229	32649833	605	*	0.852474691	6.50E-09	4.43E-05	Distal Intergenic	3	32567463	32612366	44904	2	51143	uc011axh.2	-36863	ENSG00000144635	DYNC1LI1	dynein cytoplasmic 1 light intermediate chain 1
chr11	43567422	43567828	407	*	0.848913951	6.17E-06	0.001715652	Distal Intergenic	11	43581206	43581303	98	1	100313777	uc021qgk.1	-13378	ENSG00000211568	MIR670	microRNA 670
chr4	47717295	47717748	454	*	0.84817875	4.79E-06	0.001506686	Intron (uc011bzf.2/10699, intron 4 of 20)	4	47596018	47792277	196260	2	10699	uc011bzf.2	74529	ENSG00000145244	CORIN	corin, serine peptidase
chr11	48171726	48172230	505	*	0.845527664	5.87E-10	1.38E-05	Exon (uc001ngp.4/5795, exon 18 of 25)	11	48157243	48161328	4086	1	5795	uc010rhr.1	14483	ENSG00000149177	PTPRJ	protein tyrosine phosphatase receptor type J
chr7	132972252	132972824	573	*	0.844729674	7.34E-08	0.000153489	Intron (uc003vri.3/60412, intron 2 of 8)	7	132938121	133750513	812393	1	60412	uc011kpo.2	34131	ENSG00000131558	EXOC4	exocyst complex component 4
chr19	42264786	42265543	758	*	0.841429855	2.02E-06	0.000957722	Exon (uc002orm.2/4680, exon 3 of 6)	19	42259398	42276113	16716	1	4680	uc002orm.2	5388	ENSG00000086548	CEACAM6	CEA cell adhesion molecule 6
chr11	103810484	103810970	487	*	0.840524148	6.10E-05	0.005725899	Intron (uc001php.3/80310, intron 5 of 6)	11	103720634	103720708	75	1	100616457	uc021qpj.1	89850	ENSG00000264200	MIR4693	microRNA 4693
chr5	17338628	17339297	670	*	0.83958336	2.65E-05	0.003650035	Distal Intergenic	5	17379015	17387419	8405	2	401177	uc003jga.3	48122	ENSG00000250822	LINC02111	long intergenic non-protein coding RNA 2111
chr14	95485049	95485502	454	*	0.839147179	6.62E-06	0.001795553	Distal Intergenic	14	95561685	95570386	8702	2	23405	uc001ydy.1	84884	ENSG00000100697	DICER1	dicer 1, ribonuclease III
chr5	169046976	169047584	609	*	0.838965831	8.59E-07	0.000616065	Distal Intergenic	5	169064251	169510386	446136	1	1794	uc003maf.3	-16667	ENSG00000134516	DOCK2	dedicator of cytokinesis 2
chr15	91875543	91875939	397	*	0.837774131	9.55E-06	0.002119744	Distal Intergenic	15	91643182	91844539	201358	1	9899	uc010uqv.2	232361	ENSG00000185518	SV2B	synaptic vesicle glycoprotein 2B
chr2	198770707	198771088	382	*	0.837520631	5.71E-05	0.005570807	Intron (uc002uuv.4/5334, intron 1 of 6)	2	198669426	199014608	345183	1	5334	uc010fsp.3	101281	ENSG00000115896	PLCL1	phospholipase C like 1 (inactive)
chr13	72031580	72031950	371	*	0.836301916	8.99E-05	0.006935726	Intron (uc021rkj.1/1602, intron 10 of 10)	13	72012098	72441330	429233	2	1602	uc021rkj.1	409380	ENSG00000276644	DACH1	dachshund family transcription factor 1
chr1	62369737	62370224	488	*	0.836135638	6.01E-05	0.005689838	Intron (uc009waf.1/10207, intron 24 of 35)	1	62417926	62583006	165081	1	10207	uc010oot.2	-47702	ENSG00000132849	PATJ	PATJ crumbs cell polarity complex component
chr14	36223574	36223924	351	*	0.835776387	2.60E-06	0.001096326	Intron (uc001wti.3/253959, intron 7 of 40)	14	36145435	36230212	84778	2	253959	uc001wtk.1	6288	ENSG00000174373	RALGAPA1	Ral GTPase activating protein catalytic alpha subunit 1
chr11	103945492	103945944	453	*	0.834428246	0.00332157	0.046718665	Intron (uc001php.3/80310, intron 1 of 6)	11	103907308	103909922	2615	1	414301	uc001phr.2	38184	ENSG00000170967	DDI1	DNA damage inducible 1 homolog 1
chr7	48356463	48357079	617	*	0.831672032	1.21E-06	0.000745413	Exon (uc003toq.2/154664, exon 27 of 62)	7	48352664	48444262	91599	1	154664	uc003tos.1	3799	ENSG00000179869	ABCA13	ATP binding cassette subfamily A member 13
chr11	14796121	14796513	393	*	0.829571935	2.08E-05	0.003210259	3' UTR	11	14901682	14908880	7199	2	120227	uc001mls.1	112367	ENSG00000186104	CYP2R1	cytochrome P450 family 2 subfamily R member 1
chr12	40903717	40904164	448	*	0.828940218	3.66E-05	0.004328548	Distal Intergenic	12	41086244	41366519	280276	1	1272	uc009zjy.3	-182080	ENSG00000018236	CNTN1	contactin 1
chr8	139344408	139345331	924	*	0.826834499	2.14E-07	0.000295991	Intron (uc003yux.3/51059, intron 3 of 20)	8	139142266	139489699	347434	2	51059	uc003yux.3	144368	ENSG00000147724	FAM135B	family with sequence similarity 135 member B
chr13	41738200	41738630	431	*	0.824112993	0.000115603	0.007909522	Intron (uc001uxv.1/uc001uxv.1, intron 3 of 3)	13	41765711	41768702	2992	2	84078	uc001uxw.1	30072	ENSG00000120696	KBTBD7	kelch repeat and BTB domain containing 7
chr15	79081234	79081615	382	*	0.823722588	2.82E-05	0.003799443	Intron (uc002bej.4/11173, intron 7 of 23)	15	79051545	79103773	52229	2	11173	uc002bej.4	22158	ENSG00000136378	ADAMTS7	ADAM metallopeptidase with thrombospondin type 1 motif 7
chr10	9628645	9629173	529	*	0.82302768	1.17E-05	0.002341667	Distal Intergenic	10	10826402	10836877	10476	2	207107	uc001ikf.1	1207704	ENSG00000225383	SFTA1P	surfactant associated 1, pseudogene
chr9	77823044	77823690	647	*	0.822708135	0.000366362	0.014096639	Distal Intergenic	9	77703501	77762114	58614	1	26578	uc004ajx.4	119543	ENSG00000134996	OSTF1	osteoclast stimulating factor 1
chr1	41595007	41595470	464	*	0.822514595	7.66E-07	0.000595741	Intron (uc010ojr.2/22955, intron 2 of 8)	1	41492871	41625605	132735	2	22955	uc010ojr.2	30135	ENSG00000010803	SCMH1	Scm polycomb group protein homolog 1
chr2	159569528	159570056	529	*	0.818804987	4.56E-06	0.001462571	Intron (uc002uab.1/uc002uab.1, intron 1 of 3)	2	159525682	159533867	8186	1	8502	uc002uae.1	43846	ENSG00000144283	PKP4	plakophilin 4
chr12	100443806	100444316	511	*	0.818371139	1.17E-05	0.002345728	Exon (uc001tgp.3/23074, exon 11 of 15)	12	100430863	100486726	55864	2	23074	uc001tgp.3	42410	ENSG00000111647	UHRF1BP1L	UHRF1 binding protein 1 like
chr5	95265662	95266150	489	*	0.815456568	1.21E-05	0.002372849	Intron (uc003klr.4/22936, intron 2 of 11)	5	95220802	95297775	76974	2	22936	uc003klr.4	31625	ENSG00000118985	ELL2	elongation factor for RNA polymerase II 2
chr5	59517693	59518204	512	*	0.814419886	1.65E-05	0.002783491	Intron (uc003jsb.3/5144, intron 1 of 16)	5	59282228	59558386	276159	2	5144	uc003jse.1	40182	ENSG00000113448	PDE4D	phosphodiesterase 4D
chr10	108183844	108184306	463	*	0.812201805	0.000750019	0.020655604	Distal Intergenic	10	108333421	108924466	591046	2	114815	uc001kyl.3	740160	ENSG00000108018	SORCS1	sortilin related VPS10 domain containing receptor 1
chr19	43867723	43868427	705	*	0.811507004	1.50E-05	0.00263371	Distal Intergenic	19	43857825	43867480	9656	1	57126	uc010eis.3	9898	ENSG00000204936	CD177	CD177 molecule
chr2	102529100	102529859	760	*	0.810320064	4.06E-07	0.000431726	Distal Intergenic	2	102481392	102511152	29761	1	9448	uc002tbl.3	47708	ENSG00000071054	MAP4K4	mitogen-activated protein kinase kinase kinase kinase 4
chr12	118199182	118199673	492	*	0.80835842	0.000660214	0.019326122	Exon (uc001two.2/283455, exon 4 of 20)	12	117890817	118406028	515212	2	283455	uc001two.2	206355	ENSG00000171435	KSR2	kinase suppressor of ras 2
chr3	25798078	25798602	525	*	0.808324939	3.35E-05	0.004126628	Intron (uc003cdk.3/55768, intron 2 of 9)	3	25760435	25820179	59745	2	55768	uc003cdk.3	21577	ENSG00000151092	NGLY1	N-glycanase 1
chr1	183859092	183859537	446	*	0.806969959	1.08E-05	0.002250608	Intron (uc010pof.1/23179, intron 5 of 11)	1	183904966	183915752	10787	2	23127	uc001gqp.3	56215	ENSG00000198756	COLGALT2	collagen beta(1-O)galactosyltransferase 2
chr8	68349043	68349740	698	*	0.806530391	5.69E-08	0.000144557	Intron (uc003xxq.4/57094, intron 8 of 10)	8	68109884	68255912	146029	2	10565	uc003xxo.2	-93131	ENSG00000066777	ARFGEF1	ADP ribosylation factor guanine nucleotide exchange factor 1
chr11	8537779	8538352	574	*	0.805009967	5.78E-06	0.001638267	Intron (uc001mgj.1/65975, intron 2 of 13)	11	8413418	8497371	83954	2	65975	uc001mgi.1	-40408	ENSG00000130413	STK33	serine/threonine kinase 33
chr20	13838720	13839410	691	*	0.80374986	8.99E-07	0.000630308	Intron (uc002woq.5/80343, intron 19 of 20)	20	13765672	13799067	33396	1	79133	uc002woo.3	73048	ENSG00000101247	NDUFAF5	NADH:ubiquinone oxidoreductase complex assembly factor 5
chr2	242373461	242374237	777	*	0.803044134	1.43E-07	0.000213908	Exon (uc010zoq.2/9855, exon 10 of 18)	2	242434432	242439456	5025	2	10494	uc002wbl.3	65219	ENSG00000115694	STK25	serine/threonine kinase 25
chr1	171580335	171580808	474	*	0.800722162	2.74E-08	8.89E-05	Distal Intergenic	1	171548967	171562650	13684	1	23215	uc010pmj.2	31368	ENSG00000117523	PRRC2C	proline rich coiled-coil 2C
chr10	78023030	78023532	503	*	0.800658552	9.90E-05	0.007273526	Intron (uc001jxi.3/83938, intron 4 of 5)	10	77542519	78317126	774608	1	83938	uc001jxi.3	480511	ENSG00000148655	LRMDA	leucine rich melanocyte differentiation associated
chr5	55636811	55637518	708	*	0.800350789	6.59E-08	0.000151859	Distal Intergenic	5	55395507	55529186	133680	2	79722	uc003jqu.3	-107625	ENSG00000164512	ANKRD55	ankyrin repeat domain 55
chr6	55964518	55965300	783	*	0.800019313	2.53E-06	0.00108875	Intron (uc010jzz.3/81578, intron 4 of 16)	6	55921388	55956459	35072	2	81578	uc003pcr.3	-8059	ENSG00000124749	COL21A1	collagen type XXI alpha 1 chain
chr5	93845913	93846257	345	*	0.795417979	0.000729052	0.020371956	Intron (uc011cuk.2/285600, intron 5 of 20)	5	93486556	93954309	467754	2	285600	uc011cuk.2	108052	ENSG00000185261	KIAA0825	KIAA0825
chr5	59441662	59442524	863	*	0.794685399	7.24E-05	0.006262156	Intron (uc003jsb.3/5144, intron 2 of 16)	5	59282228	59558386	276159	2	5144	uc003jse.1	115862	ENSG00000113448	PDE4D	phosphodiesterase 4D
chr4	80876889	80877366	478	*	0.793827634	1.04E-05	0.002206723	Intron (uc003hly.4/118429, intron 16 of 16)	4	80826725	80992808	166084	2	118429	uc003hlx.1	115442	ENSG00000163297	ANTXR2	ANTXR cell adhesion molecule 2
chr4	185169571	185169955	385	*	0.79311465	1.12E-05	0.00228675	Distal Intergenic	4	185009859	185139114	129256	2	133121	uc003iwc.3	-30457	ENSG00000164303	ENPP6	ectonucleotide pyrophosphatase/phosphodiesterase 6
chr6	96961532	96962152	621	*	0.792561465	1.26E-10	3.96E-06	Distal Intergenic	6	96969702	97003151	33450	1	23376	uc003por.3	-7550	ENSG00000014123	UFL1	UFM1 specific ligase 1
chr5	68609297	68609815	519	*	0.791751159	1.36E-08	6.37E-05	5' UTR	5	68576519	68616407	39889	2	202243	uc003jvv.1	6592	ENSG00000183323	CCDC125	coiled-coil domain containing 125
chr10	90668322	90668963	642	*	0.791715134	1.27E-05	0.002457351	Exon (uc001kfk.4/57559, exon 4 of 11)	10	90672113	90683259	11147	1	57559	uc001kfn.4	-3150	ENSG00000138134	STAMBPL1	STAM binding protein like 1
chr14	102361505	102362048	544	*	0.790410914	1.87E-08	7.02E-05	Intron (uc001ykk.3/5527, intron 10 of 14)	14	102348498	102378962	30465	1	5527	uc001ykq.3	13007	ENSG00000078304	PPP2R5C	protein phosphatase 2 regulatory subunit B'gamma
chr19	12497726	12498302	577	*	0.789999804	1.01E-05	0.002187716	Intron (uc002mts.4/90576, intron 1 of 3)	19	12490003	12512088	22086	2	90576	uc002mts.4	13786	ENSG00000196466	ZNF799	zinc finger protein 799
chr12	47956673	47957047	375	*	0.789975471	0.000429043	0.015416306	Distal Intergenic	12	48055715	48099844	44130	2	79657	uc001rpr.3	142797	ENSG00000005175	RPAP3	RNA polymerase II associated protein 3
chr10	91352755	91353238	484	*	0.789020865	5.00E-07	0.000470307	Promoter (<=1kb)	10	91352504	91352584	81	2	406901	uc001kgq.2	-171	ENSG00000198997	MIR107	microRNA 107
chr1	172431658	172432310	653	*	0.787506128	1.56E-08	6.37E-05	Intron (uc001gik.3/92346, intron 5 of 6)	1	172410597	172413230	2634	2	5279	uc001gio.3	-18428	ENSG00000135845	PIGC	phosphatidylinositol glycan anchor biosynthesis class C
chr11	103838614	103839166	553	*	0.785129359	2.07E-05	0.003196928	Intron (uc001php.3/80310, intron 3 of 6)	11	103907308	103909922	2615	1	414301	uc001phr.2	-68142	ENSG00000170967	DDI1	DNA damage inducible 1 homolog 1
chr8	94039134	94039675	542	*	0.784821674	8.32E-06	0.001972286	Distal Intergenic	8	93895758	94029901	134144	2	286144	uc003yfr.4	-9233	ENSG00000205133	TRIQK	triple QxxK/R motif containing
chr10	72653015	72653954	940	*	0.782232043	8.84E-08	0.000166316	Distal Intergenic	10	72643267	72648541	5275	2	5092	uc001jrn.1	-4474	ENSG00000166228	PCBD1	pterin-4 alpha-carbinolamine dehydratase 1
chr1	232667086	232667837	752	*	0.781867488	1.98E-06	0.000951218	Distal Intergenic	1	232533712	232651243	117532	2	57568	uc001hvg.3	-15843	ENSG00000116991	SIPA1L2	signal induced proliferation associated 1 like 2
chr14	75947707	75948108	402	*	0.781793197	1.24E-06	0.000746089	Distal Intergenic	14	75988784	76013334	24551	1	10538	uc001xrr.3	-40676	ENSG00000156127	BATF	basic leucine zipper ATF-like transcription factor
chr1	241815121	241815662	542	*	0.780511841	9.79E-06	0.002147617	Promoter (<=1kb)	1	241815580	241965434	149855	1	128025	uc001hzg.2	0	ENSG00000162843	WDR64	WD repeat domain 64
chr7	140303829	140304268	440	*	0.780147686	6.41E-09	4.43E-05	Promoter (1-2kb)	7	140218220	140302342	84123	2	27147	uc011kre.2	-1487	ENSG00000146966	DENND2A	DENN domain containing 2A
chr7	41303620	41304231	612	*	0.779942037	0.000126651	0.00835548	Distal Intergenic	7	41733514	41752792	19279	1	285954	uc003ths.2	-429283	ENSG00000224116	INHBA-AS1	INHBA antisense RNA 1
chr15	101220965	101221854	890	*	0.779814532	2.83E-05	0.003801469	Distal Intergenic	15	101142755	101191904	49150	1	140460	uc002bwk.3	78210	ENSG00000183475	ASB7	ankyrin repeat and SOCS box containing 7
chr5	114888765	114889229	465	*	0.777779573	2.56E-06	0.001091672	Distal Intergenic	5	114856608	114880591	23984	2	56929	uc003krb.1	-8174	ENSG00000145780	FEM1C	fem-1 homolog C
chr1	185400008	185400544	537	*	0.777711227	5.98E-08	0.00014511	Distal Intergenic	1	185292979	185304171	11193	2	100288079	uc001grn.4	-95837	ENSG00000261024	GS1-279B7.1	microtubule associated protein 1 light chain 3 beta pseudogene
chr15	88273196	88273553	358	*	0.777570336	0.000482941	0.016545773	Distal Intergenic	15	88120160	88122917	2758	1	145978	uc002bmc.1	153036	ENSG00000259527	LINC00052	long intergenic non-protein coding RNA 52
chr6	17441867	17442385	519	*	0.776719942	1.07E-06	0.000693708	Intron (uc010jpk.1/10486, intron 3 of 11)	6	17393736	17558023	164288	1	10486	uc011djd.2	48131	ENSG00000112186	CAP2	cyclase associated actin cytoskeleton regulatory protein 2
chr3	101454099	101454981	883	*	0.774125357	2.93E-07	0.000356946	Intron (uc010hpm.1/79598, intron 5 of 7)	3	101450207	101486181	35975	1	79598	uc003dvm.1	3892	ENSG00000182504	CEP97	centrosomal protein 97
chr13	109620236	109620652	417	*	0.772774119	2.08E-06	0.000978125	Intron (uc001vqt.1/23026, intron 20 of 34)	13	109538495	109780039	241545	1	23026	uc010tjh.1	81741	ENSG00000041515	MYO16	myosin XVI
chr9	135566605	135567044	440	*	0.771514638	3.64E-07	0.000405066	Distal Intergenic	9	135533474	135545788	12315	2	64794	uc004cbs.2	-20817	ENSG00000125485	DDX31	DEAD-box helicase 31
chr21	30164295	30165231	937	*	0.771418596	7.80E-11	3.96E-06	Distal Intergenic	21	30244513	30257695	13183	2	29104	uc002ymq.2	92464	ENSG00000156239	N6AMT1	N-6 adenine-specific DNA methyltransferase 1
chr7	22014733	22015479	747	*	0.771256859	7.83E-08	0.000156649	Distal Intergenic	7	21940517	21985542	45026	2	55536	uc010kul.3	-29191	ENSG00000164649	CDCA7L	cell division cycle associated 7 like
chr13	73599456	73599995	540	*	0.769851734	1.12E-05	0.00228675	Distal Intergenic	13	73629114	73651676	22563	1	688	uc001vjd.3	-29119	ENSG00000102554	KLF5	Kruppel like factor 5
chr2	137196220	137196867	648	*	0.769478844	7.52E-08	0.000153758	Distal Intergenic	2	136871919	136875725	3807	2	7852	uc002tuz.3	-320495	ENSG00000121966	CXCR4	C-X-C motif chemokine receptor 4
chr4	74556495	74557126	632	*	0.769388211	7.13E-05	0.006229587	Distal Intergenic	4	74606223	74609433	3211	1	3576	uc003hhe.3	-49097	ENSG00000169429	CXCL8	C-X-C motif chemokine ligand 8
chr18	67764753	67765456	704	*	0.769267141	0.000247457	0.011411774	Intron (uc002lko.2/25914, intron 22 of 42)	18	67671043	67727278	56236	2	25914	uc010dqp.2	-37475	ENSG00000176225	RTTN	rotatin
chr8	104591873	104592436	564	*	0.769163042	0.000215722	0.010670055	Intron (uc003ylp.3/9699, intron 1 of 23)	8	104512976	105266656	753681	1	9699	uc003ylp.3	78897	ENSG00000176406	RIMS2	regulating synaptic membrane exocytosis 2
chr8	73934808	73935307	500	*	0.768980926	4.52E-05	0.00486507	Intron (uc003xzd.2/7013, intron 4 of 9)	8	73921097	73959987	38891	1	7013	uc003xze.2	13711	ENSG00000147601	TERF1	telomeric repeat binding factor 1
chr2	102570370	102571014	645	*	0.766935718	0.000137107	0.008587479	Distal Intergenic	2	102608306	102641218	32913	1	7850	uc002tbo.2	-37292	ENSG00000115590	IL1R2	interleukin 1 receptor type 2
chr1	9319913	9320855	943	*	0.765936058	1.66E-09	2.23E-05	Intron (uc001apt.3/9563, intron 3 of 4)	1	9294863	9331394	36532	1	9563	uc001apt.3	25050	ENSG00000049239	H6PD	hexose-6-phosphate dehydrogenase/glucose 1-dehydrogenase
chr4	103290006	103290411	406	*	0.764508893	8.62E-05	0.006772027	Distal Intergenic	4	103182821	103266655	83835	2	64116	uc003hwc.2	-23351	ENSG00000138821	SLC39A8	solute carrier family 39 member 8
chr3	149023192	149023560	369	*	0.76412484	0.001736759	0.03232234	Distal Intergenic	3	149036285	149051259	14975	2	116441	uc021xfl.1	27699	ENSG00000163762	TM4SF18	transmembrane 4 L six family member 18
chr7	41374916	41375304	389	*	0.764119128	3.84E-05	0.004444871	Distal Intergenic	7	41733514	41752792	19279	1	285954	uc003ths.2	-358210	ENSG00000224116	INHBA-AS1	INHBA antisense RNA 1
chr1	185406053	185406517	465	*	0.763894279	2.45E-05	0.003523588	Distal Intergenic	1	185292979	185304171	11193	2	100288079	uc001grn.4	-101882	ENSG00000261024	GS1-279B7.1	microtubule associated protein 1 light chain 3 beta pseudogene
chr5	60542640	60542994	355	*	0.763751485	0.000101784	0.007399928	Distal Intergenic	5	60453536	60458302	4767	2	643155	uc010iwm.1	-84338	ENSG00000188725	SMIM15	small integral membrane protein 15
chr14	56575520	56576136	617	*	0.763162139	2.35E-05	0.003432536	Distal Intergenic	14	56585093	56768031	182939	1	57161	uc001xch.3	-8957	ENSG00000139946	PELI2	pellino E3 ubiquitin protein ligase family member 2
chr5	107274820	107275540	721	*	0.763105435	2.50E-06	0.001087264	Intron (uc011cvc.2/64839, intron 7 of 8)	5	106762677	107006596	243920	2	1946	uc010jbr.1	-268224	ENSG00000184349	EFNA5	ephrin A5
chr1	68715142	68715517	376	*	0.762183539	4.82E-05	0.005054372	Distal Intergenic	1	68659539	68698284	38746	2	79971	uc001deh.2	-16858	ENSG00000116729	WLS	Wnt ligand secretion mediator
chr5	17903088	17903615	528	*	0.7612646	0.001942226	0.034605825	Intron (uc003jgb.3/uc003jgb.3, intron 4 of 6)	5	17379015	17387419	8405	2	401177	uc003jga.3	-515669	ENSG00000250822	LINC02111	long intergenic non-protein coding RNA 2111
chr13	41727378	41727853	476	*	0.760372129	3.20E-05	0.004051519	Intron (uc001uxv.1/uc001uxv.1, intron 2 of 3)	13	41701709	41706936	5228	2	89890	uc001uxu.1	-20442	ENSG00000165572	KBTBD6	kelch repeat and BTB domain containing 6
chr6	88004302	88004804	503	*	0.760330325	0.000188982	0.009932329	Intron (uc003plo.2/375519, intron 2 of 2)	6	88032306	88052043	19738	1	57150	uc003plp.1	-27502	ENSG00000111850	SMIM8	small integral membrane protein 8
chr11	114482892	114483537	646	*	0.76031718	7.54E-06	0.001887251	Distal Intergenic	11	114441313	114466484	25172	2	54827	uc001ppd.3	-16408	ENSG00000137634	NXPE4	neurexophilin and PC-esterase domain family member 4
chr13	41787497	41788356	860	*	0.759827324	7.48E-06	0.001881774	Intron (uc001uxv.1/uc001uxv.1, intron 3 of 3)	13	41765711	41768702	2992	2	84078	uc001uxw.1	-18795	ENSG00000120696	KBTBD7	kelch repeat and BTB domain containing 7
chr2	41876045	41876645	601	*	0.759151868	2.01E-06	0.000957722	Distal Intergenic	2	42104695	42121186	16492	1	388942	uc002rse.3	-228050	ENSG00000214691	LINC01913	long intergenic non-protein coding RNA 1913
chr2	228736435	228737409	975	*	0.757711107	1.02E-05	0.002195061	Promoter (<=1kb)	2	228736327	228789026	52700	1	164781	uc010zlw.1	108	ENSG00000123977	DAW1	dynein assembly factor with WD repeats 1
chr14	96596293	96597175	883	*	0.757621726	0.000142849	0.008791875	Distal Intergenic	14	96671135	96710503	39369	1	624	uc010avl.2	-73960	ENSG00000168398	BDKRB2	bradykinin receptor B2
chr5	39607927	39608636	710	*	0.757364007	1.03E-05	0.002199138	Distal Intergenic	5	39371776	39425335	53560	2	1601	uc003jlx.3	-182592	ENSG00000153071	DAB2	DAB adaptor protein 2
chr13	105490546	105491137	592	*	0.75642831	2.74E-05	0.003727671	Distal Intergenic	13	106118216	106143383	25168	1	267012	uc001vpz.3	-627079	ENSG00000182346	DAOA	D-amino acid oxidase activator
chr13	80456192	80457089	898	*	0.754167381	1.50E-08	6.37E-05	Intron (uc001vlh.3/uc001vlh.3, intron 1 of 5)	13	80079509	80130212	50704	1	54602	uc001vlg.3	376683	ENSG00000102471	NDFIP2	Nedd4 family interacting protein 2
chr7	91728392	91728926	535	*	0.754023274	8.31E-07	0.000616065	Intron (uc003ulf.3/10142, intron 43 of 49)	7	91721303	91739987	18685	1	10142	uc003ull.3	7089	ENSG00000127914	AKAP9	A-kinase anchoring protein 9
chr2	159258098	159258603	506	*	0.753072023	1.21E-05	0.002372849	Intron (uc002tzq.3/130940, intron 1 of 13)	2	159027869	159313265	285397	2	130940	uc002tzq.3	54662	ENSG00000153237	CCDC148	coiled-coil domain containing 148
chr19	43850615	43851105	491	*	0.752479936	3.45E-06	0.001256132	Promoter (2-3kb)	19	43853208	43853700	493	1	23574	uc010xwn.1	-2103	NA	PRG1	p53-responsive gene 1
chr7	71848038	71848500	463	*	0.752116998	4.38E-05	0.004775126	Intron (uc003twb.4/83698, intron 2 of 6)	7	71244476	71877360	632885	2	83698	uc003twb.4	28860	ENSG00000183166	CALN1	calneuron 1
chr12	14683762	14684710	949	*	0.751648467	1.22E-05	0.002400607	Intron (uc001rcc.1/79887, intron 6 of 10)	12	14656597	14720791	64195	2	79887	uc001rcc.1	36081	ENSG00000121316	PLBD1	phospholipase B domain containing 1
chr14	36280180	36280942	763	*	0.751578438	6.64E-08	0.000151859	Promoter (1-2kb)	14	36018316	36278432	260117	2	253959	uc010tpw.1	-1748	ENSG00000174373	RALGAPA1	Ral GTPase activating protein catalytic alpha subunit 1
chr14	36151273	36151829	557	*	0.751443299	2.11E-06	0.000978362	Intron (uc001wti.3/253959, intron 20 of 40)	14	36007558	36142228	134671	2	253959	uc010amp.3	-9045	ENSG00000174373	RALGAPA1	Ral GTPase activating protein catalytic alpha subunit 1
chr3	49245124	49245647	524	*	0.750995416	7.42E-06	0.001881774	Intron (uc003cwk.2/339834, intron 3 of 9)	3	49236933	49295537	58605	1	339834	uc011bck.1	8191	ENSG00000173421	CCDC36	coiled-coil domain containing 36
chr2	98476668	98477110	443	*	0.750899929	2.63E-05	0.003642544	Intron (uc002syh.4/23505, intron 4 of 40)	2	98372801	98377660	4860	2	23505	uc002syg.3	-99008	ENSG00000075568	TMEM131	transmembrane protein 131
chr8	134907806	134908330	525	*	0.750522319	3.66E-07	0.000405066	Distal Intergenic	8	134467091	134584183	117093	2	6482	uc003yum.2	-323623	ENSG00000008513	ST3GAL1	ST3 beta-galactoside alpha-2,3-sialyltransferase 1
chr12	39316641	39317131	491	*	0.750122442	0.000484007	0.016545773	Distal Intergenic	12	39046002	39299420	253419	2	144402	uc001rls.1	-17221	ENSG00000139117	CPNE8	copine 8
chr7	148057188	148057739	552	*	0.749782651	0.000548817	0.017618973	Intron (uc003weu.2/26047, intron 21 of 23)	7	148036553	148118088	81536	1	26047	uc003wev.2	20635	ENSG00000174469	CNTNAP2	contactin associated protein like 2
chr1	68678611	68679287	677	*	0.749626935	3.09E-08	9.21E-05	Intron (uc001dee.3/79971, intron 1 of 11)	1	68615965	68659904	43940	2	79971	uc021oor.1	-18707	ENSG00000116729	WLS	Wnt ligand secretion mediator
chr5	58634216	58634807	592	*	0.749068206	4.49E-06	0.001457788	Intron (uc003jrw.2/5144, intron 1 of 14)	5	58264866	58652727	387862	2	5144	uc003jrw.2	17920	ENSG00000113448	PDE4D	phosphodiesterase 4D
chr10	8254378	8254787	410	*	0.748391313	4.09E-05	0.004602705	Distal Intergenic	10	8096667	8117164	20498	1	2625	uc001ika.3	157711	ENSG00000107485	GATA3	GATA binding protein 3
chr20	1978172	1978667	496	*	0.748107344	1.28E-05	0.002461574	Intron (uc002wfu.1/uc002wfu.1, intron 3 of 3)	20	1959402	1974931	15530	2	5173	uc021vzu.1	-3241	ENSG00000101327	PDYN	prodynorphin
chr8	19923889	19924389	501	*	0.747842165	1.52E-05	0.002650298	Distal Intergenic	8	20002366	20040717	38352	2	6570	uc003wzm.3	116328	ENSG00000036565	SLC18A1	solute carrier family 18 member A1
chr18	2528925	2529561	637	*	0.74767564	6.54E-07	0.000535068	Distal Intergenic	18	2537524	2555037	17514	2	64863	uc010dkj.3	25476	ENSG00000101574	METTL4	methyltransferase like 4
chr5	59214365	59214780	416	*	0.746778767	0.000336968	0.013449718	Intron (uc003jsb.3/5144, intron 3 of 16)	5	58264866	59189621	924756	2	5144	uc003jsa.2	-24744	ENSG00000113448	PDE4D	phosphodiesterase 4D
chr7	31920963	31921890	928	*	0.746643093	7.37E-06	0.001881112	Intron (uc003tcm.2/5137, intron 2 of 17)	7	31792632	32110466	317835	2	5137	uc003tcm.2	188576	ENSG00000154678	PDE1C	phosphodiesterase 1C
chr6	106451999	106452788	790	*	0.74601121	0.000261647	0.011779348	Distal Intergenic	6	106534195	106557814	23620	1	639	uc003prd.2	-81407	ENSG00000057657	PRDM1	PR/SET domain 1
chr7	111470153	111470624	472	*	0.7460005	5.30E-05	0.00532289	Intron (uc003vfw.3/9732, intron 10 of 35)	7	111366164	111429080	62917	2	9732	uc011kmm.2	-41073	ENSG00000128512	DOCK4	dedicator of cytokinesis 4
chr9	85986321	85987167	847	*	0.745843302	1.56E-07	0.000225342	Intron (uc004amr.1/257019, intron 3 of 14)	9	85857905	85946876	88972	2	257019	uc022biz.1	-39445	ENSG00000172159	FRMD3	FERM domain containing 3
chr1	12769349	12770105	757	*	0.745500137	0.000346515	0.013653531	Distal Intergenic	1	12776118	12788726	12609	1	126767	uc001aug.1	-6013	ENSG00000188984	AADACL3	arylacetamide deacetylase like 3
chr14	56139325	56139901	577	*	0.744937701	4.57E-06	0.001462571	Promoter (<=1kb)	14	56138503	56141022	2520	1	3895	uc031qoq.1	822	ENSG00000126777	KTN1	kinectin 1
chr2	152528740	152529072	333	*	0.743809114	9.54E-05	0.007142645	Exon (uc021vrb.1/4703, exon 35 of 148)	2	152545732	152563511	17780	2	4703	uc010fny.2	34439	ENSG00000183091	NEB	nebulin
chr4	26187356	26187851	496	*	0.743570224	8.59E-06	0.002005387	Distal Intergenic	4	26321332	26436752	115421	1	3516	uc003grx.2	-133481	ENSG00000168214	RBPJ	recombination signal binding protein for immunoglobulin kappa J region
chr13	60254921	60255415	495	*	0.743379855	5.54E-07	0.000491805	Intron (uc001vhs.4/81624, intron 1 of 1)	13	60239721	60325074	85354	2	81624	uc001vhs.4	69659	ENSG00000139734	DIAPH3	diaphanous related formin 3
chr2	61151915	61152492	578	*	0.743230216	3.13E-05	0.004020417	Distal Intergenic	2	61108752	61150178	41427	1	5966	uc002san.1	43163	ENSG00000162924	REL	REL proto-oncogene, NF-kB subunit
chr3	42329136	42329661	526	*	0.74291489	3.04E-05	0.003947619	Distal Intergenic	3	42299318	42307662	8345	2	885	uc003cld.1	-21474	ENSG00000187094	CCK	cholecystokinin
chr9	7655280	7655841	562	*	0.742499335	6.12E-07	0.000512167	Distal Intergenic	9	7796491	7799767	3277	2	90871	uc022bdi.1	143926	ENSG00000137038	DMAC1	distal membrane arm assembly complex 1
chr9	81808052	81808837	786	*	0.742466419	1.03E-08	5.39E-05	Distal Intergenic	9	82186878	82341656	154779	1	7091	uc004alc.3	-378041	ENSG00000106829	TLE4	TLE family member 4, transcriptional corepressor
chr6	113807803	113808378	576	*	0.742269594	8.86E-06	0.002037303	Distal Intergenic	6	114178527	114184652	6126	1	4082	uc003pvy.4	-370149	ENSG00000277443	MARCKS	myristoylated alanine rich protein kinase C substrate
chr6	147798842	147799441	600	*	0.741898828	3.53E-05	0.004250339	Distal Intergenic	6	147829828	147891157	61330	1	389432	uc003qmc.2	-30387	ENSG00000203727	SAMD5	sterile alpha motif domain containing 5
chr4	119009559	119010153	595	*	0.741514655	6.64E-06	0.001796148	Intron (uc011cgf.1/9348, intron 2 of 7)	4	118955500	119179789	224290	1	9348	uc003ibx.3	54059	ENSG00000164100	NDST3	N-deacetylase and N-sulfotransferase 3
chr11	15638283	15639009	727	*	0.740415704	2.65E-05	0.003650035	Distal Intergenic	11	15170648	15268756	98109	1	387755	uc010rcs.3	467635	ENSG00000188487	INSC	INSC spindle orientation adaptor protein
chr5	64311688	64312177	490	*	0.739997687	0.000749028	0.020647918	Intron (uc003jtn.1/10283, intron 13 of 13)	5	64064755	64314590	249836	1	10283	uc010iwt.1	246933	ENSG00000153015	CWC27	CWC27 spliceosome associated cyclophilin
chr12	102511854	102512480	627	*	0.739797682	3.87E-05	0.004444871	Promoter (<=1kb)	12	102467973	102512361	44389	2	79023	uc001tjc.3	0	ENSG00000075188	NUP37	nucleoporin 37
chr3	152783725	152784175	451	*	0.739506603	1.13E-06	0.000709904	Distal Intergenic	3	152880029	152886263	6235	1	5912	uc003ezr.3	-95854	ENSG00000181467	RAP2B	RAP2B, member of RAS oncogene family
chr2	86802330	86802975	646	*	0.739129403	1.55E-06	0.000829151	Intron (uc010ytl.2/100526767, intron 3 of 7)	2	86730553	86790620	60068	2	51652	uc021vkf.1	-11710	ENSG00000115561	CHMP3	charged multivesicular body protein 3
chr8	133052660	133053058	399	*	0.738854028	0.00035162	0.013752318	Intron (uc003ytg.2/729330, intron 4 of 12)	8	133036467	133062116	25650	2	729330	uc003ytg.2	9058	ENSG00000253117	OC90	otoconin 90
chr7	107186653	107187167	515	*	0.738842171	6.74E-07	0.000538217	Intron (uc003vec.2/10466, intron 5 of 21)	7	107204402	107218968	14567	1	11062	uc003veh.4	-17235	ENSG00000105865	DUS4L	dihydrouridine synthase 4 like
chr14	107069329	107069671	343	*	0.738736541	0.000834029	0.021966119	Intron (uc031qqx.1/uc031qqx.1, intron 156 of 4910)	14	106938455	106951529	13075	1	338005	uc001ysy.2	130874	ENSG00000270816	LINC00221	long intergenic non-protein coding RNA 221
chr6	159299430	159299880	451	*	0.738642063	3.49E-05	0.004246735	Distal Intergenic	6	159309619	159331385	21767	1	100130967	uc021zhp.1	-9739	ENSG00000203711	C6orf99	chromosome 6 open reading frame 99
chr5	59008997	59009421	425	*	0.738379093	3.39E-06	0.001254319	Intron (uc003jry.3/5144, intron 1 of 15)	5	58264866	59064438	799573	2	5144	uc003jry.3	55017	ENSG00000113448	PDE4D	phosphodiesterase 4D
chr2	228621244	228621865	622	*	0.737923639	9.93E-06	0.002161795	Distal Intergenic	2	228551117	228582745	31629	2	80704	uc010zlv.1	-38499	ENSG00000135917	SLC19A3	solute carrier family 19 member 3
chr2	228691766	228692542	777	*	0.737486628	2.99E-06	0.001160717	Distal Intergenic	2	228678558	228682280	3723	1	6364	uc002vpm.2	13208	ENSG00000115009	CCL20	C-C motif chemokine ligand 20
chr7	156852790	156853479	690	*	0.73722011	0.000108396	0.007638654	Distal Intergenic	7	156803551	156809118	5568	1	645249	uc003wne.2	49239	ENSG00000243479	MNX1-AS1	MNX1 antisense RNA 1 (head to head)
chr2	66416290	66416701	412	*	0.737086994	0.000580434	0.018067405	Distal Intergenic	2	66585381	66585460	80	2	100616464	uc021vis.1	168759	ENSG00000264525	MIR4778	microRNA 4778
chr11	4485394	4485966	573	*	0.737041986	4.22E-05	0.004668027	Distal Intergenic	11	4470525	4471591	1067	1	119774	uc001lyz.2	14869	ENSG00000181963	OR52K2	olfactory receptor family 52 subfamily K member 2
chr4	70608211	70609187	977	*	0.737026119	3.03E-06	0.001162942	Intron (uc003hen.3/27284, intron 4 of 7)	4	70592686	70626430	33745	2	27284	uc003hen.3	17243	ENSG00000173597	SULT1B1	sulfotransferase family 1B member 1
chr2	99320271	99320759	489	*	0.736778272	1.32E-05	0.002498235	Intron (uc002sze.3/11320, intron 2 of 15)	2	99235569	99347589	112021	2	11320	uc002sze.3	26830	ENSG00000071073	MGAT4A	alpha-1,3-mannosyl-glycoprotein 4-beta-N-acetylglucosaminyltransferase A
chr8	143403792	143404647	856	*	0.736642656	3.81E-08	0.000105454	Intron (uc003ywj.3/203062, intron 5 of 12)	8	143293441	143436124	142684	2	203062	uc003ywj.3	31477	ENSG00000171045	TSNARE1	t-SNARE domain containing 1
chr3	28417863	28418472	610	*	0.736508128	0.000204969	0.010409543	Intron (uc003ceh.3/152098, intron 1 of 9)	3	28431989	28566632	134644	1	152098	uc003cei.3	-13517	ENSG00000206559	ZCWPW2	zinc finger CW-type and PWWP domain containing 2
chr15	68328260	68329138	879	*	0.735963075	8.84E-07	0.000625067	Distal Intergenic	15	68346572	68446077	99506	1	8554	uc010ujx.2	-17434	ENSG00000033800	PIAS1	protein inhibitor of activated STAT 1
chr8	135528307	135528839	533	*	0.735825387	2.41E-06	0.00107398	Intron (uc011ljj.2/57623, intron 3 of 5)	8	135490031	135577914	87884	2	57623	uc011ljj.2	49075	ENSG00000066827	ZFAT	zinc finger and AT-hook domain containing
chr3	114741119	114741540	422	*	0.735587961	1.28E-05	0.002461574	Intron (uc003ebm.3/26137, intron 1 of 11)	3	114056947	114790261	733315	2	26137	uc003ebm.3	48721	ENSG00000181722	ZBTB20	zinc finger and BTB domain containing 20
chr4	85769295	85769612	318	*	0.735570012	6.71E-05	0.006010414	Intron (uc003hpd.3/23001, intron 5 of 67)	4	85730019	85818163	88145	2	23001	uc003hpf.3	48551	ENSG00000163625	WDFY3	WD repeat and FYVE domain containing 3
chr6	145568877	145569289	413	*	0.73550105	1.55E-05	0.002672173	Distal Intergenic	6	145946440	145992467	46028	2	7957	uc003qku.3	423178	ENSG00000112425	EPM2A	EPM2A glucan phosphatase, laforin
chr10	331113	331741	629	*	0.735170735	2.96E-07	0.000356946	Intron (uc001ifp.3/22982, intron 34 of 36)	10	255829	300577	44749	1	10771	uc010pzy.2	75284	ENSG00000015171	ZMYND11	zinc finger MYND-type containing 11
chr7	28722241	28722807	567	*	0.73510863	8.55E-07	0.000616065	Promoter (2-3kb)	7	28725721	28764776	39056	1	9586	uc011jzr.2	-2914	ENSG00000146592	CREB5	cAMP responsive element binding protein 5
chr8	99240315	99240932	618	*	0.735080769	7.83E-06	0.00191272	Intron (uc011lgw.1/79815, intron 2 of 9)	8	99204387	99263982	59596	2	79815	uc011lgw.1	23050	ENSG00000104361	NIPAL2	NIPA like domain containing 2
chr1	55503837	55504442	606	*	0.734471279	1.46E-06	0.000793714	Promoter (<=1kb)	1	55505149	55518464	13316	1	255738	uc010ool.2	-707	ENSG00000169174	PCSK9	proprotein convertase subtilisin/kexin type 9
chr1	180396554	180396953	400	*	0.734418179	9.14E-06	0.002056516	Intron (uc001gog.3/84320, intron 4 of 7)	1	180407449	180407525	77	2	100423032	uc021pfq.1	10572	ENSG00000265435	MIR3121	microRNA 3121
chr8	19931175	19931937	763	*	0.734232311	2.65E-06	0.001100471	Distal Intergenic	8	20002366	20040717	38352	2	6570	uc003wzm.3	108780	ENSG00000036565	SLC18A1	solute carrier family 18 member A1
chr7	17882073	17882539	467	*	0.733679683	8.84E-05	0.00686203	Intron (uc003stv.3/23161, intron 12 of 25)	7	17830385	17861320	30936	2	23161	uc010kub.3	-20753	ENSG00000071189	SNX13	sorting nexin 13
chr1	179995702	179996056	355	*	0.733429099	5.60E-06	0.001616593	Intron (uc001gnt.3/9857, intron 14 of 37)	1	179965688	180006240	40553	1	9857	uc001gnu.3	30014	ENSG00000135837	CEP350	centrosomal protein 350
chr3	141783339	141783781	443	*	0.733110131	0.000132877	0.008486827	Intron (uc003eum.4/7029, intron 3 of 13)	3	141663270	141747507	84238	2	7029	uc011bng.2	-35832	ENSG00000114126	TFDP2	transcription factor Dp-2
chr11	14856383	14856949	567	*	0.732879873	0.000142665	0.008791875	Exon (uc001mln.3/5140, exon 11 of 16)	11	14901682	14908880	7199	2	120227	uc001mls.1	51931	ENSG00000186104	CYP2R1	cytochrome P450 family 2 subfamily R member 1
chr11	33570958	33571454	497	*	0.732683124	1.02E-05	0.002196592	Intron (uc001mun.1/25758, intron 3 of 10)	11	33563877	33695646	131770	1	25758	uc021qfs.1	7081	ENSG00000110427	KIAA1549L	KIAA1549 like
chr12	106691082	106691529	448	*	0.731670272	0.000101492	0.007395319	Distal Intergenic	12	106696581	106719672	23092	1	255394	uc001tll.3	-5052	ENSG00000166046	TCP11L2	t-complex 11 like 2
chr15	51667931	51668568	638	*	0.731185046	4.61E-06	0.001469296	Promoter (<=1kb)	15	51669455	51700209	30755	1	342035	uc002abb.3	-887	ENSG00000186417	GLDN	gliomedin
chr8	6092055	6092782	728	*	0.730313302	9.40E-05	0.007091015	Distal Intergenic	8	6261077	6264069	2993	2	100287015	uc003wqf.3	171287	ENSG00000246089	LOC100287015	uncharacterized LOC100287015
chr9	72161778	72162370	593	*	0.729937322	1.43E-07	0.000213908	Intron (uc004ahh.2/320, intron 1 of 12)	9	72042449	72287275	244827	2	320	uc004ahh.2	124905	ENSG00000107282	APBA1	amyloid beta precursor protein binding family A member 1
chr12	56014207	56014629	423	*	0.72991243	0.000215653	0.010670055	Distal Intergenic	12	56030676	56031617	942	1	121130	uc010spq.2	-16047	ENSG00000175398	OR10P1	olfactory receptor family 10 subfamily P member 1
chr7	31853923	31854514	592	*	0.729707021	5.86E-05	0.005624285	Intron (uc003tcm.2/5137, intron 15 of 17)	7	31726631	31748069	21439	1	10842	uc011kaf.2	127292	ENSG00000106341	PPP1R17	protein phosphatase 1 regulatory subunit 17
chr19	30572776	30573316	541	*	0.728822937	0.000199847	0.010241007	Distal Intergenic	19	30476101	30507519	31419	1	8725	uc002nst.3	96675	ENSG00000105176	URI1	URI1 prefoldin like chaperone
chr12	107993212	107993634	423	*	0.728671853	0.000225364	0.010883761	Intron (uc009zut.1/121551, intron 4 of 9)	12	107974634	108053419	78786	1	121551	uc001tml.1	18578	ENSG00000151136	BTBD11	BTB domain containing 11
chr5	72170250	72170862	613	*	0.728247089	3.77E-06	0.001312588	Intron (uc011csi.1/3842, intron 5 of 8)	5	72174418	72174490	73	1	100616152	uc021yal.1	-3556	ENSG00000263593	MIR4804	microRNA 4804
chr1	231388509	231389293	785	*	0.728108877	7.92E-07	0.000610808	Intron (uc009xfo.1/8443, intron 2 of 7)	1	231372442	231376924	4483	2	128061	uc001huo.1	-11585	ENSG00000143633	C1orf131	chromosome 1 open reading frame 131
chr9	86168753	86169658	906	*	0.727607145	7.47E-06	0.001881774	Distal Intergenic	9	85859539	86153348	293810	2	257019	uc004ams.2	-15405	ENSG00000172159	FRMD3	FERM domain containing 3
chr18	1610255	1610650	396	*	0.727388791	0.002100551	0.036268772	Distal Intergenic	18	1268312	1407181	138870	2	56651	uc002kld.1	-203074	NA	LINC00470	long intergenic non-protein coding RNA 470
chr13	41751289	41751795	507	*	0.726528258	6.06E-05	0.005704523	Intron (uc001uxv.1/uc001uxv.1, intron 3 of 3)	13	41765711	41768702	2992	2	84078	uc001uxw.1	16907	ENSG00000120696	KBTBD7	kelch repeat and BTB domain containing 7
chr16	74323295	74323613	319	*	0.725162918	0.000210618	0.010518408	Distal Intergenic	16	74330673	74340186	9514	1	5713	uc002fcq.3	-7060	ENSG00000103035	PSMD7	proteasome 26S subunit, non-ATPase 7
chr6	45359256	45360011	756	*	0.724954086	2.16E-05	0.0032692	Intron (uc011dvx.2/860, intron 2 of 8)	6	44794467	45345788	551322	2	8464	uc011dvv.3	-13468	ENSG00000196284	SUPT3H	SPT3 homolog, SAGA and STAGA complex component
chr8	109426703	109427285	583	*	0.724698598	3.61E-05	0.004291168	Distal Intergenic	8	109455853	109499136	43284	1	9694	uc003ymw.1	-28568	ENSG00000104412	EMC2	ER membrane protein complex subunit 2
chr7	48291654	48292623	970	*	0.72405113	2.10E-05	0.00322109	Intron (uc010kyr.2/154664, intron 16 of 17)	7	48317691	48666688	348998	1	154664	uc031sxg.1	-25068	ENSG00000179869	ABCA13	ATP binding cassette subfamily A member 13
chr2	203616046	203616605	560	*	0.724043388	1.04E-05	0.002207118	Intron (uc010zhx.2/150864, intron 4 of 7)	2	203684329	203693957	9629	2	130026	uc002uzj.3	77352	ENSG00000163596	ICA1L	islet cell autoantigen 1 like
chr17	9988505	9989082	578	*	0.723648133	1.82E-06	0.000889524	Intron (uc010coh.1/8522, intron 1 of 14)	17	9813926	10017870	203945	2	8522	uc010coh.1	28788	ENSG00000007237	GAS7	growth arrest specific 7
chr21	15669385	15670008	624	*	0.723374924	1.98E-05	0.003107866	Intron (uc002yjr.3/150000, intron 5 of 5)	21	15646120	15710337	64218	1	150000	uc002yjs.3	23265	ENSG00000243064	ABCC13	ATP binding cassette subfamily C member 13 (pseudogene)
chr7	156842293	156843089	797	*	0.723240015	2.87E-05	0.00382651	Distal Intergenic	7	156803551	156809118	5568	1	645249	uc003wne.2	38742	ENSG00000243479	MNX1-AS1	MNX1 antisense RNA 1 (head to head)
chr8	74969110	74969672	563	*	0.722140267	0.000174163	0.009638083	Distal Intergenic	8	74903564	74941307	37744	1	23643	uc022awb.1	65546	ENSG00000154589	LY96	lymphocyte antigen 96
chr14	90443545	90443949	405	*	0.720660588	1.30E-06	0.000746239	Intron (uc010atm.3/55775, intron 8 of 17)	14	90451476	90499956	48481	1	55775	uc001xyd.1	-7527	ENSG00000042088	TDP1	tyrosyl-DNA phosphodiesterase 1
chr20	20829487	20830358	872	*	0.720636084	1.30E-06	0.000746239	Distal Intergenic	20	20370272	20693266	322995	2	57186	uc010zsg.2	-136221	ENSG00000188559	RALGAPA2	Ral GTPase activating protein catalytic alpha subunit 2
chr11	123538805	123539202	398	*	0.719821556	0.00027844	0.012220872	Distal Intergenic	11	123499895	123525315	25421	2	55800	uc001pzb.1	-13490	ENSG00000166257	SCN3B	sodium voltage-gated channel beta subunit 3
chr14	54799312	54799913	602	*	0.719697739	3.27E-06	0.001224092	Distal Intergenic	14	54863673	54886934	23262	1	1033	uc001xap.3	-63760	ENSG00000100526	CDKN3	cyclin dependent kinase inhibitor 3
chr7	32707100	32707600	501	*	0.71958777	0.000594737	0.018236978	Intron (uc011kai.2/23080, intron 10 of 11)	7	32620553	32758780	138228	2	100129460	uc003tcw.3	51180	NA	DPY19L1P1	DPY19L1 pseudogene 1
chr2	167200810	167201176	367	*	0.719583209	3.25E-05	0.004080573	Intron (uc010fpl.3/6335, intron 1 of 26)	2	167051697	167232497	180801	2	6335	uc010fpl.3	31321	ENSG00000169432	SCN9A	sodium voltage-gated channel alpha subunit 9
chr2	208152601	208153022	422	*	0.71832246	2.31E-06	0.001038483	Distal Intergenic	2	207938862	208031970	93109	2	8609	uc031rrb.1	-120631	ENSG00000118263	KLF7	Kruppel like factor 7
chr8	70667536	70667927	392	*	0.717051854	4.15E-05	0.004617135	Exon (uc010lzb.3/81796, exon 3 of 8)	8	70584568	70745404	160837	2	81796	uc010lzb.3	77477	ENSG00000137571	SLCO5A1	solute carrier organic anion transporter family member 5A1
chr7	36067920	36068463	544	*	0.716771158	3.57E-07	0.000404707	Distal Intergenic	7	36192836	36341152	148317	1	80820	uc003tfa.3	-124373	ENSG00000122547	EEPD1	endonuclease/exonuclease/phosphatase family domain containing 1
chr7	3791030	3791927	898	*	0.716316271	0.000630843	0.018804771	Intron (uc003smx.3/221935, intron 4 of 44)	7	4050598	4308631	258034	1	221935	uc010kso.3	-258671	ENSG00000146555	SDK1	sidekick cell adhesion molecule 1
chr6	17465561	17466331	771	*	0.715818778	8.81E-08	0.000166316	Intron (uc010jpk.1/10486, intron 3 of 11)	6	17393736	17558023	164288	1	10486	uc011djd.2	71825	ENSG00000112186	CAP2	cyclase associated actin cytoskeleton regulatory protein 2
chr10	105064800	105065353	554	*	0.715668917	1.34E-05	0.002513899	Intron (uc001kwt.3/84108, intron 9 of 9)	10	105036920	105050108	13189	1	9118	uc001kws.3	27880	ENSG00000148798	INA	internexin neuronal intermediate filament protein alpha
chr4	184820335	184820940	606	*	0.715372208	2.28E-07	0.000305445	Distal Intergenic	4	184826509	184938875	112367	1	56977	uc003ivz.1	-5569	ENSG00000173320	STOX2	storkhead box 2
chr17	15057337	15057910	574	*	0.715282048	9.23E-05	0.00704494	Distal Intergenic	17	15154944	15155013	70	2	100616125	uc021tqk.1	97103	ENSG00000265110	MIR4731	microRNA 4731
chr4	128944078	128944595	518	*	0.713898741	9.98E-05	0.007321184	Intron (uc021xrt.1/80167, intron 9 of 10)	4	128932828	128957476	24649	1	80167	uc003ifv.3	11250	ENSG00000164074	ABHD18	abhydrolase domain containing 18
chr11	37472398	37473243	846	*	0.713408846	8.11E-05	0.006633214	Distal Intergenic	11	36613493	36619829	6337	2	5897	uc021qgd.1	-852569	ENSG00000175097	RAG2	recombination activating 2
chr2	169953186	169953691	506	*	0.713194505	0.000137575	0.008599742	Distal Intergenic	2	169937617	169952677	15061	1	10170	uc010zde.2	15569	ENSG00000073737	DHRS9	dehydrogenase/reductase 9
chr12	92341203	92342042	840	*	0.713041468	1.27E-07	0.000206123	Distal Intergenic	12	92378752	92535489	156738	2	256021	uc031qiz.1	193447	ENSG00000257242	LINC01619	long intergenic non-protein coding RNA 1619
chr2	176501970	176502580	611	*	0.712950794	6.23E-05	0.005780001	Distal Intergenic	2	176790410	176867018	76609	2	80856	uc002ukc.1	364438	ENSG00000144320	LNPK	lunapark, ER junction formation factor
chr1	115101762	115102189	428	*	0.712640913	7.38E-05	0.006320964	Intron (uc001eez.3/163259, intron 24 of 29)	1	115110181	115124265	14085	2	10286	uc001efa.3	22076	ENSG00000116752	BCAS2	BCAS2 pre-mRNA processing factor
chr6	7404875	7405523	649	*	0.712360344	3.97E-07	0.000428776	Promoter (1-2kb)	6	7402880	7418270	15391	1	83732	uc003mxo.3	1995	ENSG00000124784	RIOK1	RIO kinase 1
chr3	107463334	107463710	377	*	0.711893191	5.14E-06	0.001541591	Exon (uc003dwk.5/56987, exon 8 of 17)	3	107493566	107530176	36611	1	56987	uc003dwo.5	-29856	ENSG00000114439	BBX	BBX high mobility group box domain containing
chr1	95581270	95581984	715	*	0.711873893	2.82E-05	0.003799443	Promoter (<=1kb)	1	95582894	95663161	80268	1	148534	uc001drb.3	-910	ENSG00000152078	TLCD4	TLC domain containing 4
chr3	87298051	87298540	490	*	0.711545772	0.000291509	0.012551302	Intron (uc003dqp.4/25978, intron 3 of 5)	3	87276413	87304698	28286	1	25978	uc011bgn.2	21638	ENSG00000083937	CHMP2B	charged multivesicular body protein 2B
chr17	30000004	30000745	742	*	0.71153464	2.56E-09	2.68E-05	Distal Intergenic	17	29902430	29902540	111	1	100126356	uc021tus.1	97574	ENSG00000283978	MIR365B	microRNA 365b
chr14	51640350	51640810	461	*	0.711346013	0.001460203	0.029390564	Distal Intergenic	14	51706886	51712569	5684	1	81542	uc010tqr.1	-66076	ENSG00000139921	TMX1	thioredoxin related transmembrane protein 1
chr4	181708841	181709488	648	*	0.710151936	0.000477713	0.016441427	Distal Intergenic	4	181985243	182080302	95060	2	728081	uc003iuz.3	370814	ENSG00000248197	LINC00290	long intergenic non-protein coding RNA 290
chr10	102244010	102244873	864	*	0.709853869	4.30E-07	0.000434746	Downstream (1-2kb)	10	102222812	102243399	20588	1	7479	uc001krb.3	21198	ENSG00000075290	WNT8B	Wnt family member 8B
chr6	140643556	140644095	540	*	0.709650215	2.56E-06	0.001091672	Distal Intergenic	6	140526389	140526463	75	1	100500879	uc021zgd.1	117167	ENSG00000263514	MIR3668	microRNA 3668
chr9	79765945	79766632	688	*	0.708997993	0.000346574	0.013653531	Distal Intergenic	9	79792361	79997921	205561	1	23230	uc004akp.4	-25729	ENSG00000197969	VPS13A	vacuolar protein sorting 13 homolog A
chr19	43891636	43892216	581	*	0.708553499	7.20E-05	0.006251283	Promoter (<=1kb)	19	43892763	43922767	30005	1	83639	uc002owk.3	-547	ENSG00000131126	TEX101	testis expressed 101
chr15	101111847	101112348	502	*	0.708294028	5.73E-05	0.00557168	Promoter (1-2kb)	15	101109428	101113767	4340	2	55180	uc002bwd.3	1419	ENSG00000140471	LINS1	lines homolog 1
chr1	17443462	17443821	360	*	0.707717129	0.000136188	0.00857345	Promoter (2-3kb)	1	17393256	17445948	52693	2	11240	uc001baf.3	2127	ENSG00000117115	PADI2	peptidyl arginine deiminase 2
chr12	24375285	24376119	835	*	0.706590818	5.40E-05	0.005391254	Intron (uc001rfx.4/6660, intron 4 of 17)	12	24365355	24365429	75	1	100126320	uc021qwc.1	9930	ENSG00000216192	MIR920	microRNA 920
chr3	12468127	12468683	557	*	0.706376942	8.73E-06	0.002024252	Intron (uc031rym.1/5468, intron 7 of 7)	3	12421203	12458653	37451	1	5468	uc010hea.1	46924	ENSG00000132170	PPARG	peroxisome proliferator activated receptor gamma
chr11	114502335	114502763	429	*	0.705765046	2.76E-06	0.001123768	Distal Intergenic	11	114441313	114466484	25172	2	54827	uc001ppd.3	-35851	ENSG00000137634	NXPE4	neurexophilin and PC-esterase domain family member 4
chr14	81087877	81088355	479	*	0.705666647	1.67E-06	0.000860942	Intron (uc010asz.3/145508, intron 8 of 14)	14	80943326	81302681	359356	2	145508	uc010asz.3	214326	ENSG00000100629	CEP128	centrosomal protein 128
chr8	1931384	1931790	407	*	0.704801824	2.61E-08	8.89E-05	Intron (uc003wpw.4/9920, intron 1 of 1)	8	1922044	1955109	33066	1	9920	uc003wpw.4	9340	ENSG00000176595	KBTBD11	kelch repeat and BTB domain containing 11
chr1	213322378	213322864	487	*	0.704689012	0.000183606	0.009851134	Intron (uc001hkd.3/26750, intron 5 of 13)	1	213246212	213446808	200597	1	26750	uc001hke.3	76166	ENSG00000136643	RPS6KC1	ribosomal protein S6 kinase C1
chr1	150277123	150277593	471	*	0.703924	3.45E-05	0.004217828	Intron (uc001euk.3/54460, intron 2 of 2)	1	150266269	150280819	14551	1	54460	uc001eul.3	10854	ENSG00000266472	MRPS21	mitochondrial ribosomal protein S21
chr1	244813138	244813740	603	*	0.703582181	2.61E-05	0.003630253	Promoter (2-3kb)	1	244816352	244872334	55983	1	51029	uc001iao.3	-2612	ENSG00000121644	DESI2	desumoylating isopeptidase 2
chr5	170395135	170395484	350	*	0.703212731	0.000781835	0.021122855	Exon (uc003max.2/64901, exon 14 of 18)	5	170288896	170727019	438124	1	64901	uc003mba.3	106239	ENSG00000204764	RANBP17	RAN binding protein 17
chr2	86804502	86804924	423	*	0.702905393	0.003674595	0.04946271	Intron (uc010ytl.2/100526767, intron 3 of 7)	2	86730553	86790620	60068	2	51652	uc021vkf.1	-13882	ENSG00000115561	CHMP3	charged multivesicular body protein 3
chr1	221149464	221149884	421	*	0.702861942	2.97E-05	0.003904113	Distal Intergenic	1	221052743	221058400	5658	1	3142	uc001hmv.4	96721	ENSG00000136630	HLX	H2.0 like homeobox
chr1	211971342	211971866	525	*	0.702857657	1.81E-06	0.000889524	Intron (uc001hiu.3/9926, intron 2 of 7)	1	211916799	212003577	86779	2	9926	uc001hiu.3	31711	ENSG00000123684	LPGAT1	lysophosphatidylglycerol acyltransferase 1
chr13	96308338	96308872	535	*	0.702694013	6.65E-05	0.006000002	Distal Intergenic	13	96230456	96296960	66505	2	22873	uc001vml.4	-11378	ENSG00000134874	DZIP1	DAZ interacting zinc finger protein 1
chr3	118905337	118905832	496	*	0.702126616	7.16E-05	0.006229587	Promoter (<=1kb)	3	118905561	118924000	18440	1	7348	uc003ecd.3	0	ENSG00000114638	UPK1B	uroplakin 1B
chr3	112464423	112464897	475	*	0.702053411	4.13E-06	0.00138116	Distal Intergenic	3	112534556	112564797	30242	2	344807	uc003dzi.1	99900	ENSG00000206531	CD200R1L	CD200 receptor 1 like
chr9	37570675	37571212	538	*	0.701458366	6.67E-06	0.001799119	Intron (uc004aab.3/26267, intron 1 of 10)	9	37510889	37576250	65362	2	26267	uc004aab.3	5038	ENSG00000147912	FBXO10	F-box protein 10
chr8	26376034	26376809	776	*	0.701424535	1.25E-05	0.002432289	Intron (uc003xfa.3/1808, intron 1 of 13)	8	26371709	26515693	143985	1	1808	uc003xfa.3	4325	ENSG00000092964	DPYSL2	dihydropyrimidinase like 2
chr3	60671756	60672434	679	*	0.701026046	2.49E-05	0.003552889	Intron (uc003dkx.4/2272, intron 4 of 9)	3	59735036	61237133	1502098	2	2272	uc003dkx.4	564699	ENSG00000189283	FHIT	fragile histidine triad diadenosine triphosphatase
chr19	34934954	34935533	580	*	0.700773779	7.87E-06	0.00191388	Intron (uc010xrx.1/10054, intron 4 of 11)	19	34919781	34960798	41018	1	10054	uc002nvl.3	15173	ENSG00000126261	UBA2	ubiquitin like modifier activating enzyme 2
chr6	152014506	152015394	889	*	0.70067306	6.68E-05	0.006010414	Promoter (2-3kb)	6	152011631	152424408	412778	1	2099	uc003qom.4	2875	ENSG00000091831	ESR1	estrogen receptor 1
chr9	20820673	20821125	453	*	0.700486434	6.92E-09	4.43E-05	Promoter (<=1kb)	9	20820293	20995954	175662	1	54914	uc003zoh.1	380	ENSG00000188352	FOCAD	focadhesin
chr15	45094757	45095416	660	*	0.700436136	7.87E-05	0.006529042	Distal Intergenic	15	45028540	45060025	31486	1	140691	uc010bdy.1	66217	ENSG00000185880	TRIM69	tripartite motif containing 69
chr11	10541904	10542495	592	*	0.700300481	8.12E-07	0.000616065	Intron (uc001mis.1/50862, intron 4 of 5)	11	10529434	10530723	1290	2	100463486	uc001miq.3	-11181	ENSG00000255823	MTRNR2L8	MT-RNR2 like 8
chr8	27845515	27846179	665	*	0.699657801	4.58E-05	0.004896942	Promoter (<=1kb)	8	27761886	27845147	83262	2	286133	uc003xgk.3	-368	ENSG00000168079	SCARA5	scavenger receptor class A member 5
chr12	13447802	13448584	783	*	0.699608435	0.002231363	0.037425555	Distal Intergenic	12	13523605	13529679	6075	2	283422	uc001rbs.2	81095	ENSG00000180861	LINC01559	long intergenic non-protein coding RNA 1559
chr8	6082281	6082691	411	*	0.699587426	0.000110842	0.007752945	Distal Intergenic	8	6261077	6264069	2993	2	100287015	uc003wqf.3	181378	ENSG00000246089	LOC100287015	uncharacterized LOC100287015
chr18	2151047	2151429	383	*	0.699554143	0.001011583	0.024357996	Distal Intergenic	18	2537524	2555037	17514	2	64863	uc010dkj.3	403608	ENSG00000101574	METTL4	methyltransferase like 4
chr3	137750418	137750851	434	*	0.699528689	0.000460438	0.016019465	3' UTR	3	137729006	137752494	23489	1	51208	uc010hue.1	21412	ENSG00000066405	CLDN18	claudin 18
chr11	45656109	45656690	582	*	0.699284432	0.000679738	0.01971864	Distal Intergenic	11	45669239	45687206	17968	2	8534	uc001mys.2	30516	ENSG00000175264	CHST1	carbohydrate sulfotransferase 1
chr1	162730884	162731298	415	*	0.699074301	9.37E-05	0.007087986	Exon (uc001gcf.3/4921, exon 10 of 19)	1	162760496	162782608	22113	1	51478	uc001gci.3	-29198	ENSG00000132196	HSD17B7	hydroxysteroid 17-beta dehydrogenase 7
chr4	77301633	77302154	522	*	0.697951417	9.03E-06	0.002046882	Intron (uc003hkb.4/339965, intron 7 of 23)	4	77234192	77328458	94267	2	339965	uc003hkb.4	26304	ENSG00000163749	CCDC158	coiled-coil domain containing 158
chr9	133820500	133820927	428	*	0.69771548	2.47E-05	0.003538295	Distal Intergenic	9	133804954	133814455	9502	2	84929	uc011mcd.1	-6045	ENSG00000130720	FIBCD1	fibrinogen C domain containing 1
chr2	190005885	190006624	740	*	0.697146617	2.65E-05	0.003650035	Intron (uc002uqk.3/1290, intron 1 of 53)	2	189997762	189997837	76	2	100422908	uc021vty.1	-8048	ENSG00000264725	MIR3129	microRNA 3129
chr6	82380893	82381294	402	*	0.696976761	0.001215373	0.026843594	Distal Intergenic	6	82461307	82462378	1072	2	55603	uc003pjh.1	81084	ENSG00000112773	TENT5A	terminal nucleotidyltransferase 5A
chr12	8938029	8938885	857	*	0.696951062	4.52E-07	0.000442817	Distal Intergenic	12	8975150	9029381	54232	1	144568	uc001quz.5	-36265	ENSG00000166535	A2ML1	alpha-2-macroglobulin like 1
chr2	198349558	198350323	766	*	0.696057126	1.89E-07	0.000265396	Downstream (<1kb)	2	198351308	198364640	13333	2	3329	uc002uui.3	14317	ENSG00000144381	HSPD1	heat shock protein family D (Hsp60) member 1
chr11	18592486	18593248	763	*	0.696041256	1.18E-05	0.002351298	Intron (uc031pzg.1/55293, intron 3 of 10)	11	18552950	18601065	48116	2	55293	uc031pzg.1	7817	ENSG00000151116	UEVLD	UEV and lactate/malate dehyrogenase domains
chr3	131931600	131931988	389	*	0.695274173	0.005995832	0.064809262	Intron (uc003eom.3/131034, intron 2 of 19)	3	131253577	132004254	750678	2	131034	uc003eom.3	72266	ENSG00000196353	CPNE4	copine 4
chr1	59198224	59198845	622	*	0.694547858	1.06E-06	0.000693708	Distal Intergenic	1	59151776	59165747	13972	2	114803	uc001czd.3	-32477	ENSG00000162601	MYSM1	Myb like, SWIRM and MPN domains 1
chr20	32934335	32934785	451	*	0.694145521	2.54E-05	0.003580915	Distal Intergenic	20	32951041	33099198	148158	1	83737	uc002xak.3	-16256	ENSG00000078747	ITCH	itchy E3 ubiquitin protein ligase
chr4	178382685	178383299	615	*	0.694080708	5.12E-05	0.005229381	Intron (uc003iux.1/uc003iux.1, intron 2 of 5)	4	178351929	178363657	11729	2	175	uc003iuw.3	-19028	ENSG00000038002	AGA	aspartylglucosaminidase
chr12	55236635	55237101	467	*	0.694043773	1.41E-05	0.002559468	Distal Intergenic	12	55248299	55252174	3876	1	118430	uc001sgk.3	-11198	ENSG00000172551	MUCL1	mucin like 1
chr21	17561123	17561581	459	*	0.694006127	1.33E-06	0.000746239	Intron (uc002ykb.2/388815, intron 3 of 7)	21	17566699	17982094	415396	1	388815	uc002ykc.2	-5118	ENSG00000215386	MIR99AHG	mir-99a-let-7c cluster host gene
chr2	223222294	223222736	443	*	0.693699078	3.76E-05	0.004398837	Distal Intergenic	2	223158349	223163715	5367	2	5077	uc002vna.2	-58579	ENSG00000135903	PAX3	paired box 3
chr19	8926861	8927342	482	*	0.693656503	1.09E-05	0.002250995	Intron (uc010xkh.1/148156, intron 2 of 4)	19	8920382	8932507	12126	2	148156	uc010xkh.1	5165	ENSG00000167785	ZNF558	zinc finger protein 558
chr5	112901239	112901794	556	*	0.693201665	1.51E-05	0.002637208	Exon (uc003kqn.3/64848, exon 21 of 30)	5	112849391	112930984	81594	1	64848	uc003kqn.3	51848	ENSG00000047188	YTHDC2	YTH domain containing 2
chr6	151949669	151950501	833	*	0.692545478	2.42E-07	0.000312496	Distal Intergenic	6	151977830	152129499	151670	1	2099	uc031spz.1	-27329	ENSG00000091831	ESR1	estrogen receptor 1
chr15	35144068	35144683	616	*	0.691858728	1.05E-07	0.0001936	Distal Intergenic	15	35080297	35087927	7631	2	70	uc001ziu.1	-56141	ENSG00000159251	ACTC1	actin alpha cardiac muscle 1
chr8	19942068	19942672	605	*	0.691782409	0.000150441	0.008957594	Distal Intergenic	8	20002366	20040717	38352	2	6570	uc003wzm.3	98045	ENSG00000036565	SLC18A1	solute carrier family 18 member A1
chr2	54456112	54456692	581	*	0.691687805	2.81E-05	0.003798801	Intron (uc002rxq.4/98, intron 3 of 3)	2	54480315	54483409	3095	2	388951	uc002rxr.2	26717	ENSG00000178021	TSPYL6	TSPY like 6
chr11	59471786	59472585	800	*	0.690716257	6.48E-05	0.005934755	Distal Intergenic	11	59480389	59481318	930	2	390201	uc001nof.1	8733	ENSG00000172289	OR10V1	olfactory receptor family 10 subfamily V member 1
chr18	56812227	56812640	414	*	0.690505651	5.14E-06	0.001541591	Intron (uc021uky.1/uc021uky.1, intron 1 of 1)	18	56807125	56826063	18939	1	90701	uc002lht.3	5102	ENSG00000166562	SEC11C	SEC11 homolog C, signal peptidase complex subunit
chr14	102205625	102206175	551	*	0.689607233	0.002047863	0.035690402	Distal Intergenic	14	102196774	102198862	2089	1	145200	uc010awj.3	8851	ENSG00000258512	LINC00239	long intergenic non-protein coding RNA 239
chr1	94335226	94335607	382	*	0.689535608	0.000356927	0.013859474	3' UTR	1	94335014	94344762	9749	2	30836	uc001dqf.3	9155	ENSG00000067334	DNTTIP2	deoxynucleotidyltransferase terminal interacting protein 2
chr20	20640510	20641020	511	*	0.689488021	1.34E-05	0.002513899	Intron (uc002wrz.3/57186, intron 3 of 39)	20	20370272	20610234	239963	2	57186	uc002wry.3	-30276	ENSG00000188559	RALGAPA2	Ral GTPase activating protein catalytic alpha subunit 2
chr5	153819728	153820628	901	*	0.689173044	1.22E-06	0.000746089	Intron (uc003lvi.3/386627, intron 2 of 2)	5	153769329	153825382	56054	2	386627	uc003lvi.3	4754	ENSG00000245275	SAP30L-AS1	SAP30L antisense RNA 1 (head to head)
chr8	19904402	19904799	398	*	0.68913672	0.003153929	0.04538965	Distal Intergenic	8	19796582	19824770	28189	1	4023	uc003wzk.4	107820	ENSG00000175445	LPL	lipoprotein lipase
chr3	119949611	119950546	936	*	0.688967851	2.82E-06	0.001131752	Intron (uc011bjf.2/165829, intron 2 of 8)	3	119884328	119963325	78998	2	165829	uc011bjf.2	12779	ENSG00000175697	GPR156	G protein-coupled receptor 156
chr13	53573259	53573951	693	*	0.688674493	0.00016614	0.009409953	Distal Intergenic	13	53602876	53626184	23309	1	10562	uc001vhk.2	-28925	ENSG00000102837	OLFM4	olfactomedin 4
chr16	48101813	48102419	607	*	0.688666728	0.000154048	0.009086148	Distal Intergenic	16	48116884	48180385	63502	2	94160	uc002eey.1	77966	ENSG00000140798	ABCC12	ATP binding cassette subfamily C member 12
chr8	61690029	61690370	342	*	0.688414072	0.00041996	0.01524251	Intron (uc003xue.3/55636, intron 2 of 37)	8	61653818	61780586	126769	1	55636	uc022aux.1	36211	ENSG00000171316	CHD7	chromodomain helicase DNA binding protein 7
chr2	179415675	179416057	383	*	0.688122712	4.34E-06	0.001433988	Exon (uc021vsy.2/7273, exon 285 of 312)	2	179390717	179393946	3230	2	7273	uc002umq.4	-21729	ENSG00000155657	TTN	titin
chr3	20178430	20178766	337	*	0.688115409	6.69E-05	0.006010414	Exon (uc003cbq.3/8850, exon 12 of 18)	3	20215736	20227919	12184	1	100874028	uc031ryq.1	-36970	ENSG00000231304	SGO1-AS1	SGO1 antisense RNA 1
chr15	100388434	100389032	599	*	0.687961615	1.41E-05	0.002559468	Distal Intergenic	15	100340122	100347132	7011	2	196968	uc010bow.3	-41302	ENSG00000182397	DNM1P46	dynamin 1 pseudogene 46
chr4	106422083	106422600	518	*	0.687110891	2.58E-05	0.003608304	Distal Intergenic	4	106326794	106395227	68434	2	27068	uc011cfa.1	-26856	ENSG00000138777	PPA2	inorganic pyrophosphatase 2
chr3	66753566	66754133	568	*	0.686937206	0.000485114	0.016554362	Distal Intergenic	3	66429221	66550845	121625	2	26018	uc010hoa.3	-202721	ENSG00000144749	LRIG1	leucine rich repeats and immunoglobulin like domains 1
chr14	68246043	68246806	764	*	0.686585917	1.72E-06	0.000873691	Intron (uc001xka.2/23503, intron 23 of 41)	14	68217190	68228301	11112	2	23503	uc001xkb.3	-17742	ENSG00000072121	ZFYVE26	zinc finger FYVE-type containing 26
chr18	1591831	1592303	473	*	0.686324287	5.58E-05	0.005499643	Distal Intergenic	18	1268312	1407181	138870	2	56651	uc002kld.1	-184650	NA	LINC00470	long intergenic non-protein coding RNA 470
chr3	188634338	188634780	443	*	0.685969271	9.01E-06	0.002046882	Distal Intergenic	3	188665003	189041271	376269	1	285386	uc003frv.2	-30223	ENSG00000188001	TPRG1	tumor protein p63 regulated 1
chr2	44578774	44579644	871	*	0.685871453	0.000147645	0.00889922	Intron (uc002rug.3/9581, intron 1 of 12)	2	44544748	44586889	42142	2	9581	uc002rug.3	7245	ENSG00000138078	PREPL	prolyl endopeptidase like
chr1	92993131	92993937	807	*	0.684996671	6.61E-07	0.000535804	Intron (uc001dox.3/7813, intron 17 of 17)	1	92940318	92952433	12116	2	2672	uc001dow.4	-40698	ENSG00000162676	GFI1	growth factor independent 1 transcriptional repressor
chr3	134366698	134367213	516	*	0.684981265	7.26E-05	0.006269851	Promoter (2-3kb)	3	134318765	134369864	51100	2	339855	uc010hty.3	2651	ENSG00000174611	KY	kyphoscoliosis peptidase
chr16	59072393	59072776	384	*	0.684399164	0.000358747	0.013904115	Intron (uc031qwk.1/uc031qwk.1, intron 2 of 3)	16	58741035	58768246	27212	2	2806	uc010vim.1	-304147	ENSG00000125166	GOT2	glutamic-oxaloacetic transaminase 2
chr2	111801663	111802524	862	*	0.683992072	3.38E-05	0.00415891	Intron (uc010yxk.1/55289, intron 15 of 17)	2	111878491	111886423	7933	1	10018	uc002tgt.1	-75967	ENSG00000153094	BCL2L11	BCL2 like 11
chr11	45854365	45854921	557	*	0.683755322	0.000247859	0.011424716	Distal Intergenic	11	45868669	45904799	36131	1	1408	uc009ykw.3	-13748	ENSG00000121671	CRY2	cryptochrome circadian regulator 2
chr7	41170191	41170858	668	*	0.68339686	8.44E-05	0.006715386	Distal Intergenic	7	40833056	40900366	67311	1	79783	uc003thp.2	337135	ENSG00000175600	SUGCT	succinyl-CoA:glutarate-CoA transferase
chr11	18330399	18331006	608	*	0.683271792	9.83E-07	0.000673273	Exon (uc001mod.1/11234, exon 6 of 23)	11	18300217	18343721	43505	2	11234	uc001mod.1	12715	ENSG00000110756	HPS5	HPS5 biogenesis of lysosomal organelles complex 2 subunit 2
chr14	91631329	91631877	549	*	0.682671258	3.92E-05	0.004487639	Intron (uc010atu.3/80017, intron 5 of 6)	14	91592770	91592896	127	1	100124539	uc010atw.3	38559	ENSG00000221102	SNORA11B	small nucleolar RNA, H/ACA box 11B
chr11	122107488	122108322	835	*	0.68262701	8.18E-07	0.000616065	Intron (uc009zbb.1/399959, intron 3 of 3)	11	121959811	122073770	113960	2	399959	uc009zba.2	-33718	ENSG00000255248	MIR100HG	mir-100-let-7a-2-mir-125b-1 cluster host gene
chr22	49520180	49521072	893	*	0.681428891	0.000134008	0.008512517	Distal Intergenic	22	49262582	49294198	31617	1	100128946	uc003bip.3	257598	ENSG00000205632	LINC01310	long intergenic non-protein coding RNA 1310
chr20	33275527	33275956	430	*	0.680816607	1.81E-05	0.002962991	Distal Intergenic	20	33173241	33265089	91849	2	128869	uc010gev.1	-10438	ENSG00000101464	PIGU	phosphatidylinositol glycan anchor biosynthesis class U
chr11	77140460	77141015	556	*	0.680721637	1.61E-05	0.002723171	Intron (uc001oyg.4/5058, intron 1 of 15)	11	77033062	77122997	89936	2	5058	uc001oyi.1	-17463	ENSG00000149269	PAK1	p21 (RAC1) activated kinase 1
chr14	100246849	100247546	698	*	0.680229143	8.38E-07	0.000616065	Intron (uc010avt.1/2009, intron 1 of 10)	14	100239936	100408395	168460	1	2009	uc010tww.2	6913	ENSG00000066629	EML1	EMAP like 1
chr1	92051506	92052156	651	*	0.679503763	1.82E-06	0.000889524	Distal Intergenic	1	91980376	91991321	10946	1	8317	uc009wdd.3	71130	ENSG00000097046	CDC7	cell division cycle 7
chr1	38835219	38836006	788	*	0.679401586	0.000182534	0.009847211	Distal Intergenic	1	38674706	38680439	5734	2	339442	uc021olp.1	-154780	ENSG00000237290	LINC01343	long intergenic non-protein coding RNA 1343
chr11	18569968	18570435	468	*	0.678639083	0.000661512	0.019356586	Intron (uc031pzg.1/55293, intron 7 of 10)	11	18524033	18548503	24471	2	7251	uc009yhs.2	-21465	ENSG00000074319	TSG101	tumor susceptibility 101
chr12	47922298	47922934	637	*	0.678509998	0.000199892	0.010241007	Distal Intergenic	12	48055715	48099844	44130	2	79657	uc001rpr.3	176910	ENSG00000005175	RPAP3	RNA polymerase II associated protein 3
chr8	64072041	64072749	709	*	0.678471162	1.25E-05	0.002432289	Distal Intergenic	8	64080284	64081001	718	2	101410533	uc031tbe.1	8252	ENSG00000270673	YTHDF3-AS1	YTHDF3 antisense RNA 1 (head to head)
chr8	87439722	87440258	537	*	0.678357082	3.95E-06	0.001346971	Exon (uc003ydt.3/11059, exon 11 of 25)	8	87392955	87460726	67772	1	11059	uc010mai.3	46767	ENSG00000123124	WWP1	WW domain containing E3 ubiquitin protein ligase 1
chr5	79032852	79033537	686	*	0.677967885	2.11E-05	0.003238855	Exon (uc003kgc.3/202333, exon 2 of 13)	5	78985659	79096049	110391	1	202333	uc003kgc.3	47193	ENSG00000164309	CMYA5	cardiomyopathy associated 5
chr12	24379342	24379860	519	*	0.677764274	0.000721178	0.020273271	Intron (uc001rfx.4/6660, intron 4 of 17)	12	24365355	24365429	75	1	100126320	uc021qwc.1	13987	ENSG00000216192	MIR920	microRNA 920
chr13	53698798	53699760	963	*	0.677391758	0.000767212	0.020898366	Distal Intergenic	13	53602876	53626196	23321	1	10562	uc001vhl.3	95922	ENSG00000102837	OLFM4	olfactomedin 4
chr12	47530555	47531008	454	*	0.677209743	0.000206958	0.010434095	Intron (uc001rpn.3/91523, intron 2 of 3)	12	47581595	47581674	80	1	100616486	uc021qxh.1	-50587	ENSG00000263838	MIR4698	microRNA 4698
chr15	48906240	48906722	483	*	0.677007784	5.84E-07	0.000508653	Intron (uc001zwx.2/2200, intron 2 of 65)	15	48700503	48937985	237483	2	2200	uc001zwx.2	31263	ENSG00000166147	FBN1	fibrillin 1
chr3	148778870	148779729	860	*	0.676719831	1.68E-05	0.002815377	Intron (uc003ewq.1/6596, intron 10 of 25)	3	148804119	148820610	16492	1	100873945	uc031sbw.1	-24390	ENSG00000239718	HLTF-AS1	HLTF antisense RNA 1
chr11	10226221	10226743	523	*	0.676551169	2.71E-06	0.00111297	Intron (uc001mib.2/81846, intron 1 of 39)	11	9859604	10215534	355931	2	81846	uc001mif.3	-10687	ENSG00000133812	SBF2	SET binding factor 2
chr8	139294692	139295603	912	*	0.67625385	6.16E-05	0.005755254	Intron (uc003yux.3/51059, intron 4 of 20)	8	139155103	139165459	10357	2	51059	uc003yvb.3	-129233	ENSG00000147724	FAM135B	family with sequence similarity 135 member B
chr6	160445057	160445616	560	*	0.675818826	5.66E-06	0.001624403	Exon (uc003qta.3/3482, exon 5 of 48)	6	160424323	160428696	4374	2	100271873	uc031sqy.1	-16361	ENSG00000268257	AIRN	antisense of IGF2R non-protein coding RNA
chr7	22627625	22628141	517	*	0.675233424	2.14E-05	0.003251495	Distal Intergenic	7	22602956	22613617	10662	1	100506178	uc003svi.2	24669	ENSG00000232759	LOC100506178	uncharacterized LOC100506178
chr4	14973438	14973874	437	*	0.674492144	0.001965478	0.034841956	Intron (uc003gng.4/441009, intron 7 of 7)	4	14978524	14996129	17606	2	441009	uc010idu.1	22255	ENSG00000247624	CPEB2-DT	CPEB2 divergent transcript
chr9	5144224	5144573	350	*	0.674488017	6.22E-05	0.005780001	Distal Intergenic	9	5163863	5185618	21756	2	11172	uc003zix.3	41045	ENSG00000120210	INSL6	insulin like 6
chr6	7644502	7645192	691	*	0.674305542	3.86E-05	0.004444871	Distal Intergenic	6	7602856	7609031	6176	1	154007	uc003mxt.1	41646	ENSG00000168566	SNRNP48	small nuclear ribonucleoprotein U11/U12 subunit 48
chr1	221259596	221260570	975	*	0.674184604	2.79E-07	0.000348247	Distal Intergenic	1	221052743	221058400	5658	1	3142	uc001hmv.4	206853	ENSG00000136630	HLX	H2.0 like homeobox
chr1	53398741	53399138	398	*	0.673791043	9.51E-06	0.002119017	Intron (uc001cuq.2/6342, intron 1 of 10)	1	53392901	53517289	124389	1	6342	uc010onp.2	5840	ENSG00000116171	SCP2	sterol carrier protein 2
chr12	66008293	66008748	456	*	0.673312576	0.000760306	0.020823521	Distal Intergenic	12	66217437	66221867	4431	1	8091	uc001ssp.1	-208689	ENSG00000149948	HMGA2	high mobility group AT-hook 2
chr2	44596998	44597543	546	*	0.673263967	1.47E-05	0.002591651	Intron (uc002rul.2/79823, intron 1 of 3)	2	44589043	44999731	410689	1	79823	uc002rum.3	7955	ENSG00000143919	CAMKMT	calmodulin-lysine N-methyltransferase
chr14	23205481	23206081	601	*	0.673259298	0.000102328	0.00740519	Distal Intergenic	14	23235731	23237831	2101	1	5018	uc010tnc.2	-29650	ENSG00000155463	OXA1L	OXA1L mitochondrial inner membrane protein
chr5	102581376	102582354	979	*	0.672678381	3.51E-05	0.004250339	Distal Intergenic	5	102594442	102614361	19920	1	90355	uc003kog.1	-12088	ENSG00000181751	C5orf30	chromosome 5 open reading frame 30
chr12	86164309	86164751	443	*	0.67250372	3.07E-05	0.00396933	Distal Intergenic	12	86198331	86230318	31988	2	9182	uc001taf.1	65567	ENSG00000198774	RASSF9	Ras association domain family member 9
chr8	37711118	37711525	408	*	0.672157453	3.18E-05	0.004030931	Distal Intergenic	8	37701398	37707431	6034	2	55290	uc003xkk.3	-3687	ENSG00000104221	BRF2	BRF2 RNA polymerase III transcription initiation factor subunit
chr12	14900261	14900607	347	*	0.672129422	2.13E-05	0.003251495	Distal Intergenic	12	14923654	14924065	412	2	121504	uc001rcf.4	23458	ENSG00000197837	H4-16	H4 histone 16
chr2	224532754	224533709	956	*	0.672024172	0.001394484	0.028687711	Distal Intergenic	2	224461658	224467217	5560	2	7857	uc002vnm.3	-65537	ENSG00000171951	SCG2	secretogranin II
chr2	210968706	210969027	322	*	0.6717458	9.53E-05	0.007141502	Exon (uc002vds.3/151050, exon 4 of 15)	2	210908157	211019335	111179	2	151050	uc002vdx.1	50308	ENSG00000144445	KANSL1L	KAT8 regulatory NSL complex subunit 1 like
chr7	39755593	39755994	402	*	0.671721077	2.49E-06	0.001087264	Distal Intergenic	7	39773167	39834222	61056	1	349114	uc003thf.3	-17173	NA	LINC00265	long intergenic non-protein coding RNA 265
chr2	159257532	159258057	526	*	0.671692086	6.06E-05	0.005705663	Intron (uc002tzq.3/130940, intron 1 of 13)	2	159027869	159313265	285397	2	130940	uc002tzq.3	55208	ENSG00000153237	CCDC148	coiled-coil domain containing 148
chr3	170619259	170619959	701	*	0.67167432	4.25E-05	0.00467693	Intron (uc003fhd.3/56648, intron 3 of 4)	3	170606204	170626426	20223	2	56648	uc003fhd.3	6467	ENSG00000163577	EIF5A2	eukaryotic translation initiation factor 5A2
chr10	50855456	50855930	475	*	0.670984809	4.88E-05	0.005067333	Intron (uc001jhv.1/1103, intron 8 of 14)	10	50887684	50902948	15265	1	282966	uc001jib.3	-31754	ENSG00000178645	C10orf53	chromosome 10 open reading frame 53
chr3	187574107	187574596	490	*	0.670983925	2.73E-05	0.003727671	Distal Intergenic	3	187439165	187463513	24349	2	604	uc003frq.2	-110594	ENSG00000113916	BCL6	BCL6 transcription repressor
chr10	27006118	27006767	650	*	0.670966199	6.80E-05	0.006061251	Intron (uc001isv.3/23590, intron 5 of 11)	10	27023464	27035726	12263	1	23590	uc010qdf.2	-16697	ENSG00000148459	PDSS1	decaprenyl diphosphate synthase subunit 1
chr2	31149079	31149599	521	*	0.670964076	0.00032678	0.013285424	Intron (uc002rnq.3/79623, intron 13 of 16)	2	30973969	31030311	56343	2	92291	uc002rnp.1	-118768	ENSG00000162949	CAPN13	calpain 13
chr5	147788537	147788960	424	*	0.670827889	7.79E-05	0.006498652	Exon (uc003lpg.2/81545, exon 8 of 22)	5	147774277	147822399	48123	1	81545	uc031slt.1	14260	ENSG00000145868	FBXO38	F-box protein 38
chr6	89396157	89396516	360	*	0.670589388	7.54E-05	0.006368123	Intron (uc003pmr.2/8732, intron 13 of 15)	6	89319989	89673348	353360	2	8732	uc003pmr.2	276832	ENSG00000111880	RNGTT	RNA guanylyltransferase and 5'-phosphatase
chr3	105632381	105632836	456	*	0.670158587	7.11E-06	0.001844883	Distal Intergenic	3	105438891	105588266	149376	2	868	uc011bhj.1	-44115	ENSG00000114423	CBLB	Cbl proto-oncogene B
chr1	182097706	182098378	673	*	0.669905504	1.29E-05	0.00247733	Distal Intergenic	1	182023705	182030847	7143	2	127665	uc001goz.3	-66859	ENSG00000179930	ZNF648	zinc finger protein 648
chr8	130818248	130819057	810	*	0.669848783	5.49E-05	0.005446334	Distal Intergenic	8	130760442	130799134	38693	2	56169	uc003ysr.3	-19114	ENSG00000147697	GSDMC	gasdermin C
chr12	49099934	49100337	404	*	0.669843373	5.02E-05	0.0051744	Intron (uc001rsd.4/904, intron 2 of 8)	12	49082241	49110781	28541	2	904	uc001rsd.4	10444	ENSG00000129315	CCNT1	cyclin T1
chr14	36181751	36182180	430	*	0.669375607	6.64E-05	0.006000002	Intron (uc001wti.3/253959, intron 16 of 40)	14	36007558	36142228	134671	2	253959	uc010amp.3	-39523	ENSG00000174373	RALGAPA1	Ral GTPase activating protein catalytic alpha subunit 1
chr13	37775193	37775730	538	*	0.6692608	0.000725975	0.02031456	Distal Intergenic	13	37677397	37679801	2405	2	122011	uc001uwm.1	-95392	ENSG00000180138	CSNK1A1L	casein kinase 1 alpha 1 like
chr8	9927934	9928478	545	*	0.669218945	4.08E-06	0.001375467	Intron (uc003wsx.3/4482, intron 1 of 5)	8	9911830	10286401	374572	1	4482	uc011kwx.2	16104	ENSG00000175806	MSRA	methionine sulfoxide reductase A
chr2	219069105	219069508	404	*	0.669040616	0.000772737	0.020971897	Distal Intergenic	2	219081817	219119071	37255	1	10109	uc002vhd.4	-12309	ENSG00000163466	ARPC2	actin related protein 2/3 complex subunit 2
chr9	135181169	135181906	738	*	0.669006763	1.53E-08	6.37E-05	Intron (uc004cbj.3/23064, intron 2 of 17)	9	135136827	135205886	69060	2	23064	uc004cbj.3	23980	ENSG00000107290	SETX	senataxin
chr4	16664138	16664711	574	*	0.668788248	0.000272326	0.012044944	Intron (uc003goz.3/9079, intron 2 of 7)	4	16503169	16675936	172768	2	9079	uc011bxi.2	11225	ENSG00000169744	LDB2	LIM domain binding 2
chr2	149918362	149918737	376	*	0.668734937	9.20E-05	0.007038577	Intron (uc002twv.1/130576, intron 1 of 6)	2	149934036	150071772	137737	1	130576	uc002twx.1	-15299	ENSG00000150556	LYPD6B	LY6/PLAUR domain containing 6B
chr17	53993042	53993705	664	*	0.668535115	0.000611508	0.018533769	Distal Intergenic	17	53828466	53854748	26283	1	58488	uc010dch.3	164576	ENSG00000141179	PCTP	phosphatidylcholine transfer protein
chr3	154211020	154211467	448	*	0.668400413	1.36E-05	0.002513899	Distal Intergenic	3	154055461	154147504	92044	2	344758	uc003faa.3	-63516	ENSG00000174948	GPR149	G protein-coupled receptor 149
chr3	53865120	53865487	368	*	0.668176236	5.24E-05	0.005305454	Intron (uc003dgz.3/55349, intron 2 of 8)	3	53850324	53880420	30097	2	55349	uc003dgz.3	14933	ENSG00000016391	CHDH	choline dehydrogenase
chr6	87840946	87841572	627	*	0.668146194	0.000351713	0.013752318	Distal Intergenic	6	87862551	87880081	17531	1	23036	uc003plk.3	-20979	ENSG00000188994	ZNF292	zinc finger protein 292
chr8	67886098	67886842	745	*	0.668109143	2.66E-06	0.001100471	Distal Intergenic	8	67858736	67874825	16090	2	100129654	uc022avl.1	-11273	ENSG00000261787	TCF24	transcription factor 24
chr1	32303080	32303572	493	*	0.667504754	5.38E-06	0.001580633	Distal Intergenic	1	32256031	32281580	25550	2	90853	uc001btv.3	-21500	ENSG00000134668	SPOCD1	SPOC domain containing 1
chr2	103483262	103483820	559	*	0.667261955	2.61E-05	0.003630253	Distal Intergenic	2	103414225	103434138	19914	1	130827	uc010ywe.3	69037	ENSG00000170417	TMEM182	transmembrane protein 182
chr7	22052597	22053536	940	*	0.667220764	0.000130552	0.008450598	Distal Intergenic	7	21940517	21985542	45026	2	55536	uc010kul.3	-67055	ENSG00000164649	CDCA7L	cell division cycle associated 7 like
chr4	185894236	185894692	457	*	0.665347668	3.80E-06	0.001312588	Distal Intergenic	4	185939995	185941926	1932	1	391723	uc011cko.2	-45303	ENSG00000187821	HELT	helt bHLH transcription factor
chr10	93605264	93605757	494	*	0.664911235	0.000171198	0.009547022	Exon (uc001khp.3/80351, exon 18 of 27)	10	93558151	93625232	67082	1	80351	uc001khp.3	47113	ENSG00000107854	TNKS2	tankyrase 2
chr2	159163755	159164289	535	*	0.664805599	5.89E-05	0.005644451	Intron (uc002tzq.3/130940, intron 9 of 13)	2	159023162	159092681	69520	1	554201	uc021vro.1	140593	ENSG00000227480	CCDC148-AS1	CCDC148 antisense RNA 1
chr3	9655094	9655621	528	*	0.664376991	4.74E-06	0.00150023	Distal Intergenic	3	9691117	9744078	52962	1	64419	uc003brz.3	-35496	ENSG00000163719	MTMR14	myotubularin related protein 14
chr17	21055037	21055430	394	*	0.664270437	8.72E-06	0.002024252	Intron (uc002gyo.3/25979, intron 1 of 6)	17	21069467	21075756	6290	1	25979	uc010crc.1	-14037	ENSG00000109016	DHRS7B	dehydrogenase/reductase 7B
chr7	87272958	87273527	570	*	0.664026429	0.000362186	0.014004663	Intron (uc011khd.1/154661, intron 1 of 9)	7	87288411	87461613	173203	1	154661	uc003ujd.3	-14884	ENSG00000105784	RUNDC3B	RUN domain containing 3B
chr3	60660933	60661513	581	*	0.663738588	0.000160227	0.009271372	Intron (uc003dkx.4/2272, intron 4 of 9)	3	59735036	61237133	1502098	2	2272	uc003dkx.4	575620	ENSG00000189283	FHIT	fragile histidine triad diadenosine triphosphatase
chr8	19920286	19920845	560	*	0.663451457	0.00021514	0.010664837	Distal Intergenic	8	20002366	20040717	38352	2	6570	uc003wzm.3	119872	ENSG00000036565	SLC18A1	solute carrier family 18 member A1
chr10	23443941	23444500	560	*	0.663292777	3.00E-05	0.003920084	Distal Intergenic	10	23481460	23483181	1722	1	256297	uc001irp.3	-36960	ENSG00000168267	PTF1A	pancreas associated transcription factor 1a
chr15	86471888	86472461	574	*	0.663101917	0.000305102	0.01279674	Distal Intergenic	15	86302559	86338189	35631	2	64410	uc002bly.3	-133699	ENSG00000183655	KLHL25	kelch like family member 25
chr13	94821567	94822563	997	*	0.662637558	9.67E-06	0.002139303	Intron (uc010tig.1/10082, intron 4 of 5)	13	95091841	95131936	40096	2	1638	uc001vlv.4	309373	ENSG00000080166	DCT	dopachrome tautomerase
chr5	76638845	76639356	512	*	0.662554841	9.33E-05	0.007075043	Intron (uc003kfa.3/8622, intron 6 of 21)	5	76506706	76724080	217375	1	8622	uc003kfe.3	132139	ENSG00000113231	PDE8B	phosphodiesterase 8B
chr4	173869767	173870458	692	*	0.662520814	0.00058313	0.018075495	Intron (uc003isv.3/442117, intron 9 of 12)	4	174089904	174245118	155215	1	51809	uc003isz.4	-219446	ENSG00000109586	GALNT7	polypeptide N-acetylgalactosaminyltransferase 7
chr6	152664119	152664750	632	*	0.662480695	3.68E-05	0.004336724	Intron (uc003qot.4/23345, intron 73 of 145)	6	152636357	152655408	19052	2	23345	uc010kiz.4	-8711	ENSG00000131018	SYNE1	spectrin repeat containing nuclear envelope protein 1
chr5	93873865	93874596	732	*	0.662454132	0.00022428	0.01085927	Intron (uc011cuk.2/285600, intron 2 of 20)	5	93486556	93954309	467754	2	285600	uc011cuk.2	79713	ENSG00000185261	KIAA0825	KIAA0825
chr4	85840673	85841512	840	*	0.662096335	5.99E-07	0.000512167	Intron (uc003hpd.3/23001, intron 2 of 67)	4	85730019	85818163	88145	2	23001	uc003hpf.3	-22510	ENSG00000163625	WDFY3	WD repeat and FYVE domain containing 3
chr6	152238602	152239181	580	*	0.66199198	7.21E-05	0.006251283	Intron (uc003qom.4/2099, intron 5 of 9)	6	152265308	152382259	116952	1	2099	uc010kit.1	-26127	ENSG00000091831	ESR1	estrogen receptor 1
chr15	35317971	35318398	428	*	0.661866262	0.001032329	0.024586946	Distal Intergenic	15	35270542	35280497	9956	2	54989	uc001ziw.3	-37474	ENSG00000198146	ZNF770	zinc finger protein 770
chr6	97541305	97541820	516	*	0.661538611	8.36E-05	0.006680053	Intron (uc003poy.3/114792, intron 6 of 6)	6	97458076	97588630	130555	1	114792	uc003ppa.2	83229	ENSG00000186231	KLHL32	kelch like family member 32
chr1	179742307	179742779	473	*	0.661153622	5.29E-05	0.00532289	Intron (uc009wxj.3/148753, intron 2 of 5)	1	179712298	179785333	73036	1	148753	uc009wxk.3	30009	ENSG00000143340	FAM163A	family with sequence similarity 163 member A
chr7	27829268	27829737	470	*	0.661084144	0.001476094	0.029492156	Intron (uc011jzo.2/8887, intron 8 of 16)	7	27779714	27869386	89673	1	8887	uc011jzp.2	49554	ENSG00000106052	TAX1BP1	Tax1 binding protein 1
chr16	72497053	72497417	365	*	0.660947978	0.000434359	0.015501963	Intron (uc002fci.1/uc002fci.1, intron 1 of 1)	16	72152996	72206349	53354	2	83449	uc002fcf.3	-290704	ENSG00000118557	PMFBP1	polyamine modulated factor 1 binding protein 1
chr6	87994159	87994787	629	*	0.660590276	0.000100055	0.007322491	5' UTR	6	88032306	88052043	19738	1	57150	uc003plp.1	-37519	ENSG00000111850	SMIM8	small integral membrane protein 8
chr3	45973462	45974310	849	*	0.659895562	8.33E-05	0.006673066	Intron (uc003cpb.5/79443, intron 15 of 17)	3	45984973	45989845	4873	1	10663	uc003cpc.1	-10663	ENSG00000172215	CXCR6	C-X-C motif chemokine receptor 6
chr18	22126863	22127637	775	*	0.659852666	7.59E-06	0.001890795	Distal Intergenic	18	22208146	22242162	34017	1	729950	uc002kvj.1	-80509	ENSG00000265485	LINC01915	long intergenic non-protein coding RNA 1915
chr1	179911410	179912145	736	*	0.6598116	1.83E-05	0.002974543	Distal Intergenic	1	179923908	179966310	42403	1	9857	uc001gnr.1	-11763	ENSG00000135837	CEP350	centrosomal protein 350
chr2	236693334	236694281	948	*	0.659802227	1.92E-05	0.003060408	Intron (uc021vyp.1/116987, intron 6 of 9)	2	236402733	237040444	637712	1	116987	uc002vvt.3	290601	ENSG00000157985	AGAP1	ArfGAP with GTPase domain, ankyrin repeat and PH domain 1
chr2	240940076	240940607	532	*	0.659723748	9.32E-05	0.007073204	Intron (uc002vyn.3/4705, intron 8 of 9)	2	240896789	240964819	68031	2	4705	uc002vyn.3	24212	ENSG00000130414	NDUFA10	NADH:ubiquinone oxidoreductase subunit A10
chr21	36799426	36800364	939	*	0.659638378	4.49E-06	0.001457788	Intron (uc002yut.1/861, intron 7 of 10)	21	36744805	36953227	208423	2	100506403	uc031rvg.1	152863	ENSG00000159216	LOC100506403	uncharacterized LOC100506403
chr6	136591126	136591787	662	*	0.659127872	5.59E-05	0.005501699	Promoter (1-2kb)	6	136578001	136589809	11809	2	9774	uc011edb.1	-1317	ENSG00000029363	BCLAF1	BCL2 associated transcription factor 1
chr1	200531982	200532685	704	*	0.658576282	9.69E-06	0.002139303	Intron (uc010ppj.1/9928, intron 23 of 27)	1	200520625	200587966	67342	2	9928	uc010ppj.1	55281	ENSG00000118193	KIF14	kinesin family member 14
chr13	37676484	37677236	753	*	0.658352545	0.000342208	0.01354964	Promoter (2-3kb)	13	37677397	37679801	2405	2	122011	uc001uwm.1	2565	ENSG00000180138	CSNK1A1L	casein kinase 1 alpha 1 like
chr3	48591902	48592245	344	*	0.65828247	0.000339283	0.013484875	Promoter (1-2kb)	3	48555117	48594227	39111	2	5210	uc003ctv.3	1982	ENSG00000114268	PFKFB4	6-phosphofructo-2-kinase/fructose-2,6-biphosphatase 4
chr8	41273537	41274020	484	*	0.658231701	7.77E-05	0.006493453	Distal Intergenic	8	41348081	41368499	20419	1	51125	uc003xnu.3	-74061	ENSG00000147533	GOLGA7	golgin A7
chr2	111484392	111485160	769	*	0.657926197	0.000145492	0.008873502	Distal Intergenic	2	111490150	111875799	385650	1	55289	uc010yxk.1	-4990	ENSG00000153093	ACOXL	acyl-CoA oxidase like
chr15	76786481	76787286	806	*	0.65786221	1.18E-07	0.000201194	Intron (uc010bkr.3/49855, intron 8 of 14)	15	76640538	76646992	6455	2	49855	uc031qsw.1	-139489	ENSG00000140386	SCAPER	S-phase cyclin A associated protein in the ER
chr22	43225994	43226580	587	*	0.65762677	7.43E-06	0.001881774	Intron (uc003bdd.2/26286, intron 6 of 15)	22	43192532	43253408	60877	2	26286	uc003bdd.2	26828	ENSG00000242247	ARFGAP3	ADP ribosylation factor GTPase activating protein 3
chr5	36584399	36585306	908	*	0.657115934	6.96E-06	0.001840555	Distal Intergenic	5	36606457	36609399	2943	1	6507	uc021xxn.1	-21151	ENSG00000079215	SLC1A3	solute carrier family 1 member 3
chr3	151457834	151458421	588	*	0.657034141	3.30E-06	0.001230182	Intron (uc021xgb.1/100313773, intron 1 of 1)	3	151451704	151475556	23853	1	344752	uc010hvn.3	6130	ENSG00000197953	AADACL2	arylacetamide deacetylase like 2
chr13	77755768	77756147	380	*	0.656979382	5.16E-06	0.001541591	Exon (uc010aev.3/23077, exon 33 of 83)	13	77671505	77700677	29173	2	23077	uc001vkg.1	-55091	ENSG00000005810	MYCBP2	MYC binding protein 2
chr2	163235185	163235897	713	*	0.656948081	3.74E-05	0.004379847	Intron (uc002uch.2/90134, intron 14 of 15)	2	163200583	163219148	18566	1	25801	uc002ucg.3	34602	ENSG00000115271	GCA	grancalcin
chr1	10388432	10388917	486	*	0.656779249	2.70E-06	0.001112696	Intron (uc001aqw.4/23095, intron 25 of 46)	1	10459085	10480201	21117	1	5226	uc001arc.3	-70168	ENSG00000142657	PGD	phosphogluconate dehydrogenase
chr17	33168248	33168585	338	*	0.656609434	0.000325885	0.013271964	Distal Intergenic	17	33254878	33288528	33651	2	10693	uc002hig.3	119943	ENSG00000132141	CCT6B	chaperonin containing TCP1 subunit 6B
chr8	68928155	68928650	496	*	0.65583473	0.000566346	0.017926291	Intron (uc003xxu.1/80243, intron 1 of 23)	8	68864603	69143897	279295	1	80243	uc003xxv.1	63552	ENSG00000046889	PREX2	phosphatidylinositol-3,4,5-trisphosphate dependent Rac exchange factor 2
chr2	224570502	224571494	993	*	0.655620944	0.000191259	0.009996151	Distal Intergenic	2	224461658	224467217	5560	2	7857	uc002vnm.3	-103285	ENSG00000171951	SCG2	secretogranin II
chr1	155329408	155329950	543	*	0.655494012	2.53E-06	0.00108875	Intron (uc001fkt.3/55870, intron 13 of 27)	1	155316141	155316236	96	2	693140	uc021pay.1	-13172	ENSG00000283701	MIR555	microRNA 555
chr2	24000655	24001070	416	*	0.655462316	0.000147757	0.00889922	Intron (uc002rej.4/54454, intron 13 of 18)	2	23971534	24055472	83939	2	54454	uc002rej.4	54402	ENSG00000119778	ATAD2B	ATPase family AAA domain containing 2B
chr2	198359289	198359663	375	*	0.65533792	9.75E-05	0.007216343	5' UTR	2	198351308	198364640	13333	2	3329	uc002uui.3	4977	ENSG00000144381	HSPD1	heat shock protein family D (Hsp60) member 1
chr2	40696768	40697325	558	*	0.655095804	0.000613624	0.018579619	Intron (uc002rsd.4/6546, intron 1 of 7)	2	40655613	40679209	23597	2	6546	uc010fan.1	-17559	ENSG00000183023	SLC8A1	solute carrier family 8 member A1
chr4	8324509	8325390	882	*	0.655050089	0.000630767	0.018804771	Distal Intergenic	4	8271489	8308838	37350	1	94031	uc003gla.3	53020	ENSG00000170801	HTRA3	HtrA serine peptidase 3
chr5	68539554	68539995	442	*	0.654637888	3.14E-06	0.001199972	Intron (uc010ixd.1/1022, intron 2 of 4)	5	68530622	68573257	42636	1	1022	uc003jvt.4	8932	ENSG00000134058	CDK7	cyclin dependent kinase 7
chr2	71812070	71812908	839	*	0.654551166	5.17E-05	0.00525425	Intron (uc002sie.3/8291, intron 30 of 54)	2	71803393	71913893	110501	1	8291	uc010yqy.2	8677	ENSG00000135636	DYSF	dysferlin
chr3	121497499	121497962	464	*	0.654323641	1.50E-05	0.002630831	Intron (uc003eek.2/9657, intron 10 of 11)	3	121412588	121468614	56027	2	2804	uc010hrd.2	-28885	ENSG00000173230	GOLGB1	golgin B1
chr1	109569583	109570273	691	*	0.654035396	4.56E-06	0.001462571	Intron (uc001dwi.3/22911, intron 1 of 14)	1	109512838	109560223	47386	2	22911	uc010ovf.2	-9360	ENSG00000085433	WDR47	WD repeat domain 47
chr12	40207520	40208049	530	*	0.653768472	0.00038552	0.014542329	Intron (uc009zjv.1/283461, intron 18 of 18)	12	40223326	40265763	42438	2	114134	uc001rme.1	57714	ENSG00000151229	SLC2A13	solute carrier family 2 member 13
chr12	81306819	81307596	778	*	0.653214583	4.93E-06	0.001522234	Intron (uc001szj.1/8825, intron 1 of 5)	12	81329515	81329612	98	2	693203	uc021rbc.1	22016	ENSG00000208022	MIR618	microRNA 618
chr3	196885818	196886187	370	*	0.653040087	3.27E-05	0.004092195	Intron (uc011bub.2/1739, intron 1 of 21)	3	196769431	196911002	141572	2	1739	uc011bub.2	24815	ENSG00000075711	DLG1	discs large MAGUK scaffold protein 1
chr12	13473045	13473739	695	*	0.653014517	0.005334272	0.060761877	Distal Intergenic	12	13523605	13529679	6075	2	283422	uc001rbs.2	55940	ENSG00000180861	LINC01559	long intergenic non-protein coding RNA 1559
chr1	41612088	41612668	581	*	0.652979517	0.000112738	0.007821587	Intron (uc010ojr.2/22955, intron 1 of 8)	1	41492871	41625605	132735	2	22955	uc010ojr.2	12937	ENSG00000010803	SCMH1	Scm polycomb group protein homolog 1
chr12	107392629	107393088	460	*	0.652935425	0.001289214	0.02770337	Intron (uc001tmi.4/1407, intron 7 of 12)	12	107371069	107380944	9876	2	80298	uc001tmg.2	-11685	ENSG00000120832	MTERF2	mitochondrial transcription termination factor 2
chr10	50634524	50635153	630	*	0.65289566	0.001088521	0.025290543	Distal Intergenic	10	50574161	50604062	29902	2	644168	uc021pqd.2	-30462	ENSG00000165606	DRGX	dorsal root ganglia homeobox
chr5	98283834	98284314	481	*	0.652681378	6.96E-05	0.006153971	Distal Intergenic	5	98264838	98266713	1876	1	100289230	uc021ybw.1	18996	NA	LOC100289230	uncharacterized LOC100289230
chr6	170669313	170670252	940	*	0.652498443	3.13E-08	9.21E-05	Intron (uc003qxo.1/84498, intron 6 of 7)	6	170657239	170697581	40343	1	84498	uc010kla.1	12074	ENSG00000112584	FAM120B	family with sequence similarity 120B
chr17	79239736	79240303	568	*	0.652123174	4.86E-06	0.00151899	Intron (uc002jzy.1/124565, intron 8 of 13)	17	79218804	79221435	2632	2	124565	uc031reu.1	-18301	ENSG00000157637	SLC38A10	solute carrier family 38 member 10
chr2	198534272	198535037	766	*	0.651981384	5.81E-05	0.005612349	Intron (uc002uuo.4/130132, intron 1 of 8)	2	198435527	198540584	105058	2	130132	uc002uuo.4	5547	ENSG00000162944	RFTN2	raftlin family member 2
chr11	59629816	59630501	686	*	0.651892973	4.02E-05	0.004569064	Exon (uc001noj.2/6947, exon 3 of 9)	11	59620281	59634041	13761	2	6947	uc001noj.2	3540	ENSG00000134827	TCN1	transcobalamin 1
chr12	47233852	47234347	496	*	0.651498532	0.000483798	0.016545773	Distal Intergenic	12	47173394	47219780	46387	2	55089	uc009zkl.2	-14072	ENSG00000139209	SLC38A4	solute carrier family 38 member 4
chr3	98416328	98416680	353	*	0.65127898	0.000747329	0.020635878	Distal Intergenic	3	98451080	98514689	63610	1	10402	uc003dsy.4	-34400	ENSG00000064225	ST3GAL6	ST3 beta-galactoside alpha-2,3-sialyltransferase 6
chr1	68675040	68675535	496	*	0.651267446	5.99E-05	0.005689838	Intron (uc001dee.3/79971, intron 1 of 11)	1	68615965	68659904	43940	2	79971	uc021oor.1	-15136	ENSG00000116729	WLS	Wnt ligand secretion mediator
chr6	89807070	89807476	407	*	0.650881716	7.43E-05	0.006334286	3' UTR	6	89791555	89794879	3325	1	10957	uc003pmx.3	15515	ENSG00000146278	PNRC1	proline rich nuclear receptor coactivator 1
chr6	137954173	137954721	549	*	0.650721287	2.74E-05	0.003727671	Distal Intergenic	6	137813336	137815531	2196	2	167826	uc003qhp.1	-138642	ENSG00000177468	OLIG3	oligodendrocyte transcription factor 3
chr20	2060134	2060999	866	*	0.650588775	2.38E-07	0.00031057	Distal Intergenic	20	2082528	2129198	46671	1	140901	uc002wfw.4	-21529	ENSG00000125834	STK35	serine/threonine kinase 35
chr14	61997464	61998083	620	*	0.650587214	2.61E-05	0.003630253	Intron (uc010tsa.2/5583, intron 11 of 12)	14	62010080	62017698	7619	1	5583	uc001xfo.3	-11997	ENSG00000027075	PRKCH	protein kinase C eta
chr7	41265059	41265646	588	*	0.65002599	0.001054063	0.024840454	Distal Intergenic	7	40833056	40900366	67311	1	79783	uc003thp.2	432003	ENSG00000175600	SUGCT	succinyl-CoA:glutarate-CoA transferase
chr13	110802430	110803096	667	*	0.649390457	6.11E-06	0.001711064	3' UTR	13	110801310	110959496	158187	2	1282	uc001vqw.4	156400	ENSG00000187498	COL4A1	collagen type IV alpha 1 chain
chr14	68824850	68825195	346	*	0.649164245	4.39E-06	0.001439915	Intron (uc001xkd.3/5890, intron 8 of 10)	14	69254372	69260631	6260	2	677	uc001xkh.2	435436	ENSG00000185650	ZFP36L1	ZFP36 ring finger protein like 1
chr1	39820955	39821477	523	*	0.649100247	2.31E-08	8.38E-05	Intron (uc001cdc.2/23499, intron 38 of 61)	1	39796856	39901433	104578	1	23499	uc031pmd.1	24099	ENSG00000127603	MACF1	microtubule actin crosslinking factor 1
chr2	17403991	17404887	897	*	0.648874179	0.000132837	0.008486827	Distal Intergenic	2	17691986	17699706	7721	2	729475	uc002rcl.1	294819	ENSG00000214842	RAD51AP2	RAD51 associated protein 2
chr13	53712233	53713178	946	*	0.648777799	0.00037129	0.014222242	Distal Intergenic	13	53602876	53626196	23321	1	10562	uc001vhl.3	109357	ENSG00000102837	OLFM4	olfactomedin 4
chr9	81854656	81855150	495	*	0.648344176	0.000608012	0.018480899	Distal Intergenic	9	82186878	82341656	154779	1	7091	uc004alc.3	-331728	ENSG00000106829	TLE4	TLE family member 4, transcriptional corepressor
chr6	25108427	25108924	498	*	0.648026029	5.08E-05	0.005217246	3' UTR	6	25081295	25138051	56757	2	8418	uc003ner.4	29127	ENSG00000168405	CMAHP	cytidine monophospho-N-acetylneuraminic acid hydroxylase, pseudogene
chr1	198193473	198193827	355	*	0.647638975	4.46E-05	0.004807327	Intron (uc001gun.4/140609, intron 1 of 9)	1	198126128	198291548	165421	1	140609	uc021pgx.1	67345	ENSG00000151414	NEK7	NIMA related kinase 7
chr2	127514856	127515423	568	*	0.64752333	0.001677875	0.031766089	Distal Intergenic	2	127413511	127454251	40741	1	2995	uc010flv.4	101345	ENSG00000136732	GYPC	glycophorin C (Gerbich blood group)
chr2	176651844	176652346	503	*	0.647507069	0.001437681	0.029152626	Distal Intergenic	2	176790410	176867018	76609	2	80856	uc002ukc.1	214672	ENSG00000144320	LNPK	lunapark, ER junction formation factor
chr5	114827273	114827828	556	*	0.647176123	0.00260516	0.040923798	Distal Intergenic	5	114856608	114880591	23984	2	56929	uc003krb.1	52763	ENSG00000145780	FEM1C	fem-1 homolog C
chr18	12452817	12453161	345	*	0.646738637	0.000585984	0.018098358	Exon (uc002krc.3/56907, exon 14 of 16)	18	12420188	12432236	12049	1	10650	uc010wzv.2	32629	ENSG00000141391	PRELID3A	PRELI domain containing 3A
chr3	38230771	38231235	465	*	0.646521673	1.10E-05	0.002255422	Intron (uc010hha.1/9943, intron 2 of 10)	3	38207026	38296979	89954	1	9943	uc010hhb.3	23745	ENSG00000172939	OXSR1	oxidative stress responsive kinase 1
chr18	21867658	21868356	699	*	0.646293615	1.38E-06	0.000766847	Intron (uc010xbc.2/114876, intron 2 of 15)	18	21742011	21852196	110186	2	114876	uc002kvd.3	-15462	ENSG00000141447	OSBPL1A	oxysterol binding protein like 1A
chr3	71650512	71651354	843	*	0.646188189	7.00E-06	0.001840555	Distal Intergenic	3	71247034	71633140	386107	2	27086	uc003dos.3	-17372	ENSG00000114861	FOXP1	forkhead box P1
chr7	131107607	131108071	465	*	0.646030546	3.99E-05	0.004563957	Intron (uc011kpl.2/4289, intron 9 of 18)	7	131147976	131181398	33423	1	4289	uc003vqu.3	-39905	ENSG00000128585	MKLN1	muskelin 1
chr18	2173363	2173935	573	*	0.645641617	0.000678264	0.019700277	Distal Intergenic	18	2537524	2555037	17514	2	64863	uc010dkj.3	381102	ENSG00000101574	METTL4	methyltransferase like 4
chr20	48218848	48219411	564	*	0.645613141	1.95E-06	0.000943862	Distal Intergenic	20	48120411	48184707	64297	2	5740	uc010zyi.2	-34141	ENSG00000124212	PTGIS	prostaglandin I2 synthase
chr14	50309951	50310516	566	*	0.644632694	1.97E-06	0.000948972	Intron (uc010anj.1/9147, intron 4 of 33)	14	50033027	50319539	286513	2	9147	uc010anj.1	9023	ENSG00000165525	NEMF	nuclear export mediator factor
chr6	169956826	169957599	774	*	0.644349115	1.34E-05	0.002513899	Intron (uc003qwv.2/253769, intron 13 of 14)	6	169857303	170060912	203610	2	253769	uc003qwv.2	103313	ENSG00000184465	WDR27	WD repeat domain 27
chr10	47657128	47657687	560	*	0.644327544	1.33E-06	0.000746239	Distal Intergenic	10	47746920	47753182	6263	1	244	uc009xnh.1	-89233	NA	NA	NA
chr1	173719419	173719881	463	*	0.644307234	3.73E-06	0.001309474	Intron (uc001gjc.3/27252, intron 3 of 11)	1	173684706	173703650	18945	1	27252	uc001gjd.3	34713	ENSG00000076321	KLHL20	kelch like family member 20
chr10	119464286	119464800	515	*	0.64430638	0.001741911	0.032398926	Distal Intergenic	10	119243804	119304579	60776	2	196047	uc001ldg.3	-159707	ENSG00000229847	EMX2OS	EMX2 opposite strand/antisense RNA
chr10	77389742	77390279	538	*	0.644024925	5.30E-07	0.000484298	Distal Intergenic	10	77542519	78317126	774608	1	83938	uc001jxi.3	-152240	ENSG00000148655	LRMDA	leucine rich melanocyte differentiation associated
chr2	79041258	79042146	889	*	0.643853809	0.000273182	0.012065813	Distal Intergenic	2	79252812	79255630	2819	1	130120	uc002snw.4	-210666	ENSG00000143954	REG3G	regenerating family member 3 gamma
chr6	17021539	17022074	536	*	0.64325483	4.80E-05	0.005045388	Distal Intergenic	6	17102489	17131603	29115	1	401236	uc021ymc.1	-80415	ENSG00000230873	STMND1	stathmin domain containing 1
chr9	99593218	99593922	705	*	0.642904208	0.00155262	0.030341885	Intron (uc004awp.1/158431, intron 4 of 5)	9	99579273	99616389	37117	2	158431	uc004awp.1	22467	ENSG00000196597	ZNF782	zinc finger protein 782
chr1	200103460	200103885	426	*	0.642792827	0.000164023	0.009363357	Intron (uc001gvb.4/2494, intron 7 of 7)	1	200011953	200146550	134598	1	2494	uc010pph.3	91507	ENSG00000116833	NR5A2	nuclear receptor subfamily 5 group A member 2
chr20	58361580	58362032	453	*	0.642285501	7.12E-06	0.001844883	Intron (uc002yat.3/116154, intron 7 of 12)	20	58411067	58422766	11700	1	116154	uc002yay.3	-49035	ENSG00000087495	PHACTR3	phosphatase and actin regulator 3
chr1	51154964	51155357	394	*	0.641700244	5.15E-06	0.001541591	Intron (uc009vyw.1/11124, intron 7 of 15)	1	50906935	51078170	171236	2	11124	uc010onc.1	-76794	ENSG00000185104	FAF1	Fas associated factor 1
chr3	171456291	171456898	608	*	0.641430721	8.43E-07	0.000616065	Intron (uc003fhs.3/5337, intron 1 of 26)	3	171371032	171395643	24612	2	5337	uc003fhv.1	-60648	ENSG00000075651	PLD1	phospholipase D1
chr8	59168803	59169170	368	*	0.641398005	0.000941606	0.023439303	Intron (uc003xtk.3/uc003xtk.3, intron 7 of 7)	8	59323823	59364060	40238	1	137886	uc003xtl.3	-154653	ENSG00000215114	UBXN2B	UBX domain protein 2B
chr10	64677519	64678020	502	*	0.640954531	0.000331676	0.013387862	Distal Intergenic	10	64571756	64578927	7172	2	1959	uc009xph.3	-98592	ENSG00000122877	EGR2	early growth response 2
chr11	114478257	114479042	786	*	0.640864935	1.10E-06	0.000693708	Distal Intergenic	11	114441313	114466484	25172	2	54827	uc001ppd.3	-11773	ENSG00000137634	NXPE4	neurexophilin and PC-esterase domain family member 4
chr12	42499535	42499994	460	*	0.640600846	1.19E-05	0.00235758	Exon (uc001rms.4/283464, exon 5 of 8)	12	42475648	42538673	63026	2	283464	uc001rms.4	38679	ENSG00000151233	GXYLT1	glucoside xylosyltransferase 1
chr5	118217273	118217915	643	*	0.640460061	0.000364944	0.014067364	Intron (uc003ksa.3/285605, intron 4 of 5)	5	118310281	118310362	82	1	100422885	uc021ycv.1	-92366	ENSG00000283498	MIR1244-2	microRNA 1244-2
chr18	33408715	33409430	716	*	0.640195016	2.63E-05	0.003642544	Distal Intergenic	18	33484781	33484889	109	2	406963	uc010dmv.2	75459	ENSG00000207797	MIR187	microRNA 187
chr4	27047535	27048117	583	*	0.639857916	0.000574572	0.018017997	Distal Intergenic	4	27004549	27027003	22455	1	57620	uc010iey.3	42986	ENSG00000109689	STIM2	stromal interaction molecule 2
chr2	37445826	37446688	863	*	0.639695988	1.77E-05	0.002932012	Intron (uc002rpz.3/10153, intron 5 of 15)	2	37428775	37458740	29966	2	10153	uc002rpz.3	12052	ENSG00000115816	CEBPZ	CCAAT enhancer binding protein zeta
chr4	129145570	129146053	484	*	0.639508178	0.000584289	0.018092775	Distal Intergenic	4	129120594	129132289	11696	1	55132	uc003igf.3	24976	ENSG00000138709	LARP1B	La ribonucleoprotein 1B
chr15	49312169	49312621	453	*	0.639452243	0.000105963	0.007539007	Intron (uc001zxd.2/9728, intron 7 of 16)	15	49280835	49338760	57926	2	9728	uc001zxd.2	26139	ENSG00000138593	SECISBP2L	SECIS binding protein 2 like
chr6	97552533	97553531	999	*	0.638792812	0.000111103	0.007756234	Intron (uc003poy.3/114792, intron 6 of 6)	6	97458076	97588630	130555	1	114792	uc003ppa.2	94457	ENSG00000186231	KLHL32	kelch like family member 32
chr2	208737270	208737809	540	*	0.638708122	1.09E-05	0.002250995	Intron (uc002vcl.2/389072, intron 6 of 7)	2	208627310	208634143	6834	2	7855	uc002vcj.3	-103127	ENSG00000163251	FZD5	frizzled class receptor 5
chr11	102597965	102598449	485	*	0.638618096	0.000158196	0.009215976	Promoter (2-3kb)	11	102582526	102595685	13160	2	4317	uc010ruu.1	-2280	ENSG00000118113	MMP8	matrix metallopeptidase 8
chr5	158586402	158586827	426	*	0.638553869	0.000101506	0.007395319	Exon (uc021ygv.1/uc021ygv.1, exon 1 of 1)	5	158584417	158634656	50240	2	153830	uc011ddy.2	47829	ENSG00000145860	RNF145	ring finger protein 145
chr10	104977401	104977815	415	*	0.638293814	0.000195183	0.010094702	Intron (uc001kwr.3/uc001kwr.3, intron 1 of 1)	10	104847774	104953063	105290	2	22978	uc001kwq.3	-24338	ENSG00000076685	NT5C2	5'-nucleotidase, cytosolic II
chr6	107152479	107153392	914	*	0.637952908	0.000281071	0.012285482	Distal Intergenic	6	107165327	107193879	28553	2	100422737	uc003prn.1	40487	ENSG00000235142	LINC02532	long intergenic non-protein coding RNA 2532
chr7	66488686	66489191	506	*	0.637879283	0.00013233	0.008480404	Intron (uc003tvn.4/55253, intron 6 of 15)	7	66461792	66704507	242716	1	55253	uc010lai.4	26894	ENSG00000198874	TYW1	tRNA-yW synthesizing protein 1 homolog
chr2	9190901	9191511	611	*	0.637479789	0.000156403	0.009167562	Distal Intergenic	2	9000743	9143876	143134	2	129642	uc010yix.1	-47025	ENSG00000143797	MBOAT2	membrane bound O-acyltransferase domain containing 2
chr12	26959404	26959887	484	*	0.637277951	1.39E-06	0.000768268	Intron (uc001rhg.3/3709, intron 1 of 56)	12	26488285	26986131	497847	2	3709	uc001rhg.3	26244	ENSG00000123104	ITPR2	inositol 1,4,5-trisphosphate receptor type 2
chr2	18738678	18739412	735	*	0.636817537	2.52E-06	0.00108875	Promoter (2-3kb)	2	18735989	18741959	5971	2	57665	uc002rcx.4	2547	ENSG00000240857	RDH14	retinol dehydrogenase 14
chr12	69328804	69329638	835	*	0.636769335	4.28E-07	0.000434746	Promoter (1-2kb)	12	69244956	69326979	82024	2	1368	uc001suq.3	-1825	ENSG00000135678	CPM	carboxypeptidase M
chr13	41774275	41774924	650	*	0.636619272	0.000183294	0.009850154	Intron (uc001uxv.1/uc001uxv.1, intron 3 of 3)	13	41765711	41768702	2992	2	84078	uc001uxw.1	-5573	ENSG00000120696	KBTBD7	kelch repeat and BTB domain containing 7
chr2	119127170	119127492	323	*	0.636518809	0.00335269	0.046971447	Distal Intergenic	2	118860773	118867597	6825	1	51141	uc002tll.3	266397	ENSG00000125629	INSIG2	insulin induced gene 2
chr14	35667396	35667700	305	*	0.636431309	4.95E-06	0.001522234	Intron (uc001wsy.2/9692, intron 5 of 7)	14	35591758	35743497	151740	1	9692	uc031qof.1	75638	ENSG00000100890	PRORP	protein only RNase P catalytic subunit
chr15	65461880	65462412	533	*	0.636285504	3.79E-05	0.004416504	Intron (uc002aom.3/10845, intron 3 of 13)	15	65442784	65477563	34780	2	10845	uc002aom.3	15151	ENSG00000166855	CLPX	caseinolytic mitochondrial matrix peptidase chaperone subunit
chr15	34457245	34457599	355	*	0.635900102	6.61E-05	0.005994236	Intron (uc001zhp.3/79768, intron 1 of 9)	15	34432875	34502297	69423	2	79768	uc001zhp.3	44698	ENSG00000134152	KATNBL1	katanin regulatory subunit B1 like 1
chr8	133689045	133689581	537	*	0.635684271	5.14E-05	0.005242214	Promoter (1-2kb)	8	133584201	133687863	103663	2	23639	uc022bbp.2	-1182	ENSG00000129295	LRRC6	leucine rich repeat containing 6
chr3	43648965	43649608	644	*	0.635657866	0.000923602	0.023189129	Intron (uc003cmv.3/55129, intron 1 of 12)	3	43407818	43663560	255743	2	55129	uc003cmv.3	13952	ENSG00000160746	ANO10	anoctamin 10
chr3	45338785	45339644	860	*	0.635540248	2.28E-05	0.003363543	Distal Intergenic	3	45265956	45267814	1859	2	25907	uc011baf.2	-70971	ENSG00000249992	TMEM158	transmembrane protein 158 (gene/pseudogene)
chr3	46213747	46214131	385	*	0.635266789	0.000619489	0.01864353	Intron (uc003cpg.2/1232, intron 1 of 3)	3	46205096	46308197	103102	1	1232	uc003cpg.2	8651	ENSG00000183625	CCR3	C-C motif chemokine receptor 3
chr2	70770424	70770816	393	*	0.63472948	0.000233613	0.011071862	Intron (uc010fdq.3/7039, intron 1 of 5)	2	70674412	70780770	106359	2	7039	uc010fdq.3	9954	ENSG00000163235	TGFA	transforming growth factor alpha
chr17	66920899	66921305	407	*	0.634713672	0.000418467	0.01523698	Exon (uc002jhp.3/10351, exon 10 of 38)	17	66863431	66951533	88103	2	10351	uc002jhp.3	30228	ENSG00000141338	ABCA8	ATP binding cassette subfamily A member 8
chr2	63289603	63290017	415	*	0.634586437	0.00045893	0.015990653	Distal Intergenic	2	63277937	63284966	7030	1	5013	uc010ypt.2	11666	ENSG00000115507	OTX1	orthodenticle homeobox 1
chr16	9373775	9374300	526	*	0.634540778	0.000321424	0.013173922	Distal Intergenic	16	9328774	9328803	30	1	100422920	uc021tct.1	45001	ENSG00000265841	MIR548X	microRNA 548x
chr15	42877920	42878298	379	*	0.634508845	0.000433	0.015498462	Intron (uc010udj.2/57519, intron 3 of 32)	15	42867857	43013196	145340	1	57519	uc010udj.2	10063	ENSG00000159433	STARD9	StAR related lipid transfer domain containing 9
chr18	77489010	77489689	680	*	0.634497317	3.15E-07	0.000373265	Exon (uc002lnh.2/9150, exon 11 of 13)	18	77441430	77514510	73081	1	9150	uc021ult.1	47580	ENSG00000060069	CTDP1	CTD phosphatase subunit 1
chr10	50717226	50717562	337	*	0.634400253	2.79E-06	0.001128459	Promoter (2-3kb)	10	50662526	50714526	52001	2	2074	uc001jhr.5	-2700	ENSG00000225830	ERCC6	ERCC excision repair 6, chromatin remodeling factor
chr3	59315193	59315589	397	*	0.634044559	0.000446328	0.015743989	Distal Intergenic	3	58873072	59035758	162687	2	200844	uc011bfg.1	-279435	ENSG00000163689	C3orf67	chromosome 3 open reading frame 67
chr12	117782958	117783377	420	*	0.634033413	0.008576865	0.079550992	Intron (uc001twm.2/4842, intron 1 of 28)	12	117645947	117799607	153661	2	4842	uc001twm.2	16230	ENSG00000089250	NOS1	nitric oxide synthase 1
chr4	26148354	26148834	481	*	0.633921234	0.000349518	0.013713945	Distal Intergenic	4	26321332	26436752	115421	1	3516	uc003grx.2	-172498	ENSG00000168214	RBPJ	recombination signal binding protein for immunoglobulin kappa J region
chr1	234308249	234308972	724	*	0.633638588	8.04E-06	0.001930256	Intron (uc001hvy.1/148641, intron 2 of 7)	1	234350017	234460262	110246	1	148641	uc001hwa.1	-41045	ENSG00000183780	SLC35F3	solute carrier family 35 member F3
chr7	30829354	30829833	480	*	0.633573238	3.24E-06	0.001224092	Intron (uc010kwe.3/100526825, intron 6 of 19)	7	30811033	30932002	120970	1	84182	uc003tbt.3	18321	ENSG00000106125	MINDY4	MINDY lysine 48 deubiquitinase 4
chr9	114591062	114591541	480	*	0.633444572	1.20E-05	0.002367731	Distal Intergenic	9	114500149	114557223	57075	2	158401	uc004bfs.1	-33839	ENSG00000165181	SHOC1	shortage in chiasmata 1
chr13	72120939	72121295	357	*	0.633414352	0.000413851	0.015108227	Intron (uc021rkj.1/1602, intron 6 of 10)	13	72012098	72441330	429233	2	1602	uc021rkj.1	320035	ENSG00000276644	DACH1	dachshund family transcription factor 1
chr1	232881265	232881816	552	*	0.633298706	0.000320527	0.013162049	Distal Intergenic	1	232940638	232946092	5455	1	54627	uc001hvh.2	-58822	ENSG00000212916	MAP10	microtubule associated protein 10
chr7	25386664	25387153	490	*	0.633083574	1.80E-05	0.002962478	Distal Intergenic	7	25264191	25268105	3915	2	64111	uc003sxo.3	-118559	ENSG00000105954	NPVF	neuropeptide VF precursor
chr20	34217614	34218524	911	*	0.633058836	0.000100442	0.007336418	3' UTR	20	34203885	34208965	5081	1	6676	uc010zvi.1	13729	ENSG00000061656	SPAG4	sperm associated antigen 4
chr3	187593541	187594243	703	*	0.632575844	7.43E-05	0.006334286	Distal Intergenic	3	187439165	187463513	24349	2	604	uc003frq.2	-130028	ENSG00000113916	BCL6	BCL6 transcription repressor
chr10	102094468	102095060	593	*	0.632387227	8.99E-05	0.006935726	Distal Intergenic	10	102047903	102090243	42341	2	9033	uc009xwm.1	-4225	ENSG00000107593	PKD2L1	polycystin 2 like 1, transient receptor potential cation channel
chr5	49653965	49654397	433	*	0.632384395	0.005347172	0.060835153	Distal Intergenic	5	49692031	49699299	7269	2	133418	uc010ivq.3	44902	ENSG00000170571	EMB	embigin
chr9	78765463	78766064	602	*	0.632297003	7.28E-06	0.001872097	Intron (uc004ajy.2/5125, intron 10 of 13)	9	78796314	78808346	12033	1	5125	uc004akb.3	-30250	ENSG00000099139	PCSK5	proprotein convertase subtilisin/kexin type 5
chr9	74909740	74910385	646	*	0.632281829	8.01E-06	0.001926639	Distal Intergenic	9	74966341	74975270	8930	2	7763	uc010mox.1	64885	ENSG00000107372	ZFAND5	zinc finger AN1-type containing 5
chr4	15853439	15854025	587	*	0.632190262	0.000128531	0.008407519	Distal Intergenic	4	15779931	15850706	70776	1	952	uc021xmk.1	73508	ENSG00000004468	CD38	CD38 molecule
chr4	26380238	26380789	552	*	0.632129673	0.000115191	0.007909522	Intron (uc003grx.2/3516, intron 2 of 11)	4	26322429	26436752	114324	1	3516	uc003gsb.2	57809	ENSG00000168214	RBPJ	recombination signal binding protein for immunoglobulin kappa J region
chr2	174434642	174435552	911	*	0.631901374	1.49E-06	0.000801478	Distal Intergenic	2	174219561	174233718	14158	1	83879	uc010zek.1	215081	ENSG00000144354	CDCA7	cell division cycle associated 7
chr8	68851660	68852042	383	*	0.63177723	0.000510996	0.017007889	Distal Intergenic	8	68864603	69017654	153052	1	80243	uc003xxu.1	-12561	ENSG00000046889	PREX2	phosphatidylinositol-3,4,5-trisphosphate dependent Rac exchange factor 2
chr11	111350634	111351231	598	*	0.631496863	0.000398625	0.014787629	Intron (uc001plj.3/54766, intron 5 of 5)	11	111338256	111383079	44824	2	54766	uc001plj.3	31848	ENSG00000137707	BTG4	BTG anti-proliferation factor 4
chr6	170194446	170195332	887	*	0.631238284	8.56E-06	0.002002243	Exon (uc010kkz.2/80069, exon 2 of 3)	6	170188886	170198921	10036	2	401288	uc003qxj.1	3589	ENSG00000229214	LINC00242	long intergenic non-protein coding RNA 242
chr20	33066662	33067061	400	*	0.63122461	2.05E-05	0.00318475	Intron (uc002xak.3/83737, intron 17 of 24)	20	33054130	33054223	94	1	693229	uc021wcb.1	12532	ENSG00000207997	MIR644A	microRNA 644a
chr14	102210865	102211275	411	*	0.631191949	0.000802778	0.021467571	Distal Intergenic	14	102196774	102198862	2089	1	145200	uc010awj.3	14091	ENSG00000258512	LINC00239	long intergenic non-protein coding RNA 239
chr2	44329684	44330386	703	*	0.630982973	3.74E-05	0.004379847	Distal Intergenic	2	44396000	44436571	40572	1	5495	uc002rts.3	-65614	ENSG00000138032	PPM1B	protein phosphatase, Mg2+/Mn2+ dependent 1B
chr8	124314786	124315336	551	*	0.630796876	2.11E-06	0.000978362	Distal Intergenic	8	124260690	124287781	27092	2	11244	uc010mdi.3	-27005	ENSG00000165156	ZHX1	zinc fingers and homeoboxes 1
chr16	47093643	47094301	659	*	0.630675627	0.000162264	0.009313808	Distal Intergenic	16	47115431	47143622	28192	2	81831	uc002eeq.2	49321	ENSG00000171208	NETO2	neuropilin and tolloid like 2
chr7	99338590	99339330	741	*	0.630592062	0.000130039	0.008430463	Distal Intergenic	7	99245813	99332819	87007	2	1577	uc010lgg.3	-5771	ENSG00000106258	CYP3A5	cytochrome P450 family 3 subfamily A member 5
chr7	112424595	112425101	507	*	0.630482501	1.59E-05	0.002712724	5' UTR	7	112405787	112430478	24692	2	64418	uc003vgn.3	5377	ENSG00000146802	TMEM168	transmembrane protein 168
chr21	44220606	44221211	606	*	0.630439214	7.72E-06	0.001896719	Distal Intergenic	21	44163674	44186088	22415	1	5152	uc010gpf.1	56932	ENSG00000160191	PDE9A	phosphodiesterase 9A
chr17	70640155	70640636	482	*	0.630134881	1.02E-05	0.002195061	Downstream (1-2kb)	17	70594180	70636611	42432	2	400619	uc021ucl.1	-3544	ENSG00000227036	LINC00511	long intergenic non-protein coding RNA 511
chr7	48550672	48551158	487	*	0.630044559	0.000576299	0.018045515	Exon (uc003toq.2/154664, exon 51 of 62)	7	48494634	48687091	192458	1	154664	uc010kyu.1	56038	ENSG00000179869	ABCA13	ATP binding cassette subfamily A member 13
chr11	45615280	45615891	612	*	0.630040373	1.07E-05	0.002245019	Distal Intergenic	11	45669239	45687206	17968	2	8534	uc001mys.2	71315	ENSG00000175264	CHST1	carbohydrate sulfotransferase 1
chr9	128086510	128086972	463	*	0.629632594	1.75E-05	0.002897531	Intron (uc011lzs.1/26130, intron 10 of 17)	9	128108169	128127290	19122	1	26130	uc004bpt.3	-21197	ENSG00000165219	GAPVD1	GTPase activating protein and VPS9 domains 1
chr11	4460131	4460663	533	*	0.628870368	7.88E-05	0.006529042	Distal Intergenic	11	4470525	4471591	1067	1	119774	uc001lyz.2	-9862	ENSG00000181963	OR52K2	olfactory receptor family 52 subfamily K member 2
chr6	24504731	24505336	606	*	0.628791428	5.45E-06	0.001588925	Exon (uc003nef.3/7915, exon 4 of 11)	6	24495197	24537435	42239	1	7915	uc003neg.3	9534	ENSG00000112294	ALDH5A1	aldehyde dehydrogenase 5 family member A1
chr2	159561317	159561968	652	*	0.62849907	0.000130117	0.008430463	Intron (uc002uab.1/uc002uab.1, intron 1 of 3)	2	159525682	159533867	8186	1	8502	uc002uae.1	35635	ENSG00000144283	PKP4	plakophilin 4
chr4	101903551	101904208	658	*	0.62841234	9.15E-05	0.007023198	Distal Intergenic	4	101581436	101596270	14835	2	100874275	uc031sgr.1	-307281	ENSG00000250223	LINC01216	long intergenic non-protein coding RNA 1216
chr18	54108750	54109325	576	*	0.628363302	4.10E-05	0.004602705	Distal Intergenic	18	54275510	54305736	30227	2	9352	uc002lgj.1	196411	ENSG00000091164	TXNL1	thioredoxin like 1
chr11	59986745	59987121	377	*	0.628084273	0.001515413	0.029887948	Intron (uc001nov.2/uc001nov.2, intron 3 of 5)	11	59939971	59952139	12169	2	64231	uc010rla.2	-34606	ENSG00000110077	MS4A6A	membrane spanning 4-domains A6A
chr11	10555438	10556239	802	*	0.627751868	7.06E-07	0.000553463	5' UTR	11	10533225	10562774	29550	2	50862	uc001mis.1	6535	ENSG00000110315	RNF141	ring finger protein 141
chr1	58948952	58949640	689	*	0.627333007	5.84E-06	0.001648105	Intron (uc001cyt.1/1600, intron 3 of 20)	1	58939504	59004982	65479	2	115209	uc001cyx.1	55342	ENSG00000162600	OMA1	OMA1 zinc metallopeptidase
chr10	78045436	78046393	958	*	0.627261072	3.00E-05	0.003922337	Intron (uc001jxi.3/83938, intron 4 of 5)	10	77542519	78317126	774608	1	83938	uc001jxi.3	502917	ENSG00000148655	LRMDA	leucine rich melanocyte differentiation associated
chr2	152863177	152863753	577	*	0.627009167	4.29E-06	0.001421747	Intron (uc002txz.3/785, intron 2 of 13)	2	152722301	152830485	108185	2	785	uc002tyb.2	-32692	ENSG00000182389	CACNB4	calcium voltage-gated channel auxiliary subunit beta 4
chr12	6773538	6774114	577	*	0.626804591	8.43E-06	0.001978699	Promoter (1-2kb)	12	6759704	6772308	12605	2	51147	uc009zev.3	-1230	ENSG00000111653	ING4	inhibitor of growth family member 4
chr8	74045998	74046443	446	*	0.626780937	0.000429828	0.015416306	Distal Intergenic	8	73976778	74005507	28730	2	157869	uc003xzf.3	-40491	ENSG00000164764	SBSPON	somatomedin B and thrombospondin type 1 domain containing
chr8	139286184	139286588	405	*	0.626703024	8.59E-05	0.006764	Intron (uc003yux.3/51059, intron 4 of 20)	8	139155103	139165459	10357	2	51059	uc003yvb.3	-120725	ENSG00000147724	FAM135B	family with sequence similarity 135 member B
chr8	102658875	102659495	621	*	0.626444631	5.29E-06	0.001568828	Intron (uc010mbu.3/79977, intron 13 of 15)	8	102698770	102803439	104670	2	83988	uc003yke.3	143944	ENSG00000104490	NCALD	neurocalcin delta
chr7	25173107	25173822	716	*	0.626326295	0.000839997	0.022058837	Downstream (<1kb)	7	25158270	25164980	6711	2	54205	uc003sxl.3	-8127	ENSG00000172115	CYCS	cytochrome c, somatic
chr6	89329479	89330100	622	*	0.62628244	1.23E-06	0.000746089	Intron (uc003pmr.2/8732, intron 14 of 15)	6	89319989	89673348	353360	2	8732	uc003pmr.2	343248	ENSG00000111880	RNGTT	RNA guanylyltransferase and 5'-phosphatase
chr9	79899721	79900306	586	*	0.626197992	6.74E-06	0.00180772	Intron (uc004akp.4/23230, intron 31 of 68)	9	79908257	79934589	26333	1	23230	uc010mpo.1	-7951	ENSG00000197969	VPS13A	vacuolar protein sorting 13 homolog A
chr12	123075605	123076059	455	*	0.626173089	0.0001259	0.008317638	Exon (uc001ucv.3/9735, exon 42 of 64)	12	123011809	123110947	99139	1	9735	uc010taf.2	63796	ENSG00000184445	KNTC1	kinetochore associated 1
chr2	840309	840877	569	*	0.626114302	0.000141287	0.008738874	Intron (uc002qwn.2/339822, intron 2 of 3)	2	779837	864112	84276	2	339822	uc002qwn.2	23235	ENSG00000237667	LINC01115	long intergenic non-protein coding RNA 1115
chr3	32297821	32298308	488	*	0.625864956	0.000187657	0.009932329	Intron (uc003cex.3/152189, intron 1 of 3)	3	32280171	32411813	131643	1	152189	uc010hfu.3	17650	ENSG00000170293	CMTM8	CKLF like MARVEL transmembrane domain containing 8
chr20	33165272	33165838	567	*	0.625754665	0.000118613	0.008016365	Intron (uc002xas.3/128869, intron 10 of 11)	20	33146501	33148149	1649	1	84557	uc002xaq.2	18771	ENSG00000101460	MAP1LC3A	microtubule associated protein 1 light chain 3 alpha
chr1	87244888	87245519	632	*	0.625589402	8.56E-08	0.000166316	Distal Intergenic	1	87170253	87213867	43615	1	51100	uc001dlz.3	74635	ENSG00000097033	SH3GLB1	SH3 domain containing GRB2 like, endophilin B1
chr4	123045694	123046131	438	*	0.625305098	0.000804632	0.021492729	Distal Intergenic	4	123091758	123283914	192157	1	84162	uc003ieh.3	-45627	ENSG00000138688	KIAA1109	KIAA1109
chr17	6490745	6491241	497	*	0.625179837	2.05E-05	0.00318475	Intron (uc010vtd.2/9851, intron 11 of 11)	17	6354583	6459877	105295	2	83394	uc010cln.3	-30868	ENSG00000091622	PITPNM3	PITPNM family member 3
chr3	12494275	12495004	730	*	0.625035135	1.43E-05	0.002589179	Distal Intergenic	3	12525931	12574820	48890	1	80746	uc003bwz.3	-30927	ENSG00000154743	TSEN2	tRNA splicing endonuclease subunit 2
chr16	9374648	9375252	605	*	0.625009821	0.000462487	0.01607886	Distal Intergenic	16	9328774	9328803	30	1	100422920	uc021tct.1	45874	ENSG00000265841	MIR548X	microRNA 548x
chr4	145954344	145954639	296	*	0.624885835	2.89E-05	0.003848062	Intron (uc003iju.5/10393, intron 5 of 5)	4	146019156	146050676	31521	1	6059	uc003ijx.3	-64517	ENSG00000164163	ABCE1	ATP binding cassette subfamily E member 1
chr11	59879486	59879848	363	*	0.624721981	8.96E-05	0.006933416	Distal Intergenic	11	59856137	59865940	9804	1	2206	uc021qka.1	23349	ENSG00000149534	MS4A2	membrane spanning 4-domains A2
chr11	114474884	114475583	700	*	0.62446166	6.75E-07	0.000538217	Distal Intergenic	11	114441313	114466484	25172	2	54827	uc001ppd.3	-8400	ENSG00000137634	NXPE4	neurexophilin and PC-esterase domain family member 4
chr6	109738582	109739266	685	*	0.623846429	1.20E-07	0.000201194	Intron (uc003ptg.4/285755, intron 6 of 7)	6	109761931	109763110	1180	1	6610	uc010kdq.3	-22665	ENSG00000135587	SMPD2	sphingomyelin phosphodiesterase 2
chr1	77708520	77709214	695	*	0.623735576	2.08E-05	0.003205625	Distal Intergenic	1	77619221	77685132	65912	2	10026	uc001dhl.1	-23388	ENSG00000142892	PIGK	phosphatidylinositol glycan anchor biosynthesis class K
chr2	48450226	48450826	601	*	0.623641827	1.15E-05	0.002322836	Distal Intergenic	2	48541795	48606434	64640	1	3344	uc002rwh.1	-90969	ENSG00000170802	FOXN2	forkhead box N2
chr3	138903166	138903986	821	*	0.623617224	0.000148257	0.008903638	Distal Intergenic	3	138951834	138952364	531	2	140464	uc011bmu.2	48378	ENSG00000281473	PISRT1	PISRT1 lncRNA
chr14	97338701	97339160	460	*	0.623152619	6.23E-05	0.005780001	Intron (uc001yft.3/7443, intron 11 of 12)	14	97263684	97347951	84268	1	7443	uc001yft.3	75017	ENSG00000100749	VRK1	VRK serine/threonine kinase 1
chr6	88443782	88444441	660	*	0.62286054	1.82E-08	7.02E-05	Distal Intergenic	6	88384578	88411985	27408	2	55122	uc003pmk.3	-31797	ENSG00000135334	AKIRIN2	akirin 2
chr5	176989159	176989509	351	*	0.622316371	0.000177077	0.009701436	Distal Intergenic	5	176946790	176981548	34759	2	54540	uc003mhw.3	-7611	ENSG00000146067	FAM193B	family with sequence similarity 193 member B
chr8	117449057	117449595	539	*	0.621891045	0.000573693	0.018002442	Distal Intergenic	8	116962736	117337297	374562	2	100859921	uc031tcc.1	-111760	ENSG00000249917	LINC00536	long intergenic non-protein coding RNA 536
chr10	80336789	80337365	577	*	0.621807455	7.71E-06	0.001896719	Distal Intergenic	10	80027085	80159502	132418	1	414243	uc001jzw.2	309704	ENSG00000230417	LINC00595	long intergenic non-protein coding RNA 595
chr13	46844318	46845078	761	*	0.621772755	1.55E-05	0.002672173	Distal Intergenic	13	46870580	46871979	1400	2	100861554	uc031qll.1	26901	ENSG00000261097	LINC00563	long intergenic non-protein coding RNA 563
chr10	102277933	102278475	543	*	0.621759979	4.08E-05	0.004602705	Promoter (1-2kb)	10	102246403	102279595	33193	2	25956	uc001krc.1	1120	ENSG00000075826	SEC31B	SEC31 homolog B, COPII coat complex component
chr4	119860305	119861040	736	*	0.621743124	7.50E-06	0.001881774	Intron (uc003icm.4/171024, intron 1 of 3)	4	119809996	119982402	172407	1	171024	uc011cgh.2	50309	ENSG00000172403	SYNPO2	synaptopodin 2
chr3	71695829	71696209	381	*	0.621651978	0.000196391	0.01012509	Distal Intergenic	3	71247034	71633140	386107	2	27086	uc003dos.3	-62689	ENSG00000114861	FOXP1	forkhead box P1
chr9	123237506	123238026	521	*	0.621580286	0.000226065	0.010893157	Intron (uc004bkf.4/55755, intron 15 of 37)	9	123151147	123234156	83010	2	55755	uc004bke.3	-3350	ENSG00000136861	CDK5RAP2	CDK5 regulatory subunit associated protein 2
chr6	137460929	137461355	427	*	0.621415724	0.000196335	0.01012509	Distal Intergenic	6	137464957	137494785	29829	2	116379	uc003qhl.3	33430	ENSG00000164485	IL22RA2	interleukin 22 receptor subunit alpha 2
chr11	65960698	65961153	456	*	0.62084669	1.05E-06	0.000693708	Exon (uc001ogz.1/55690, exon 2 of 7)	11	65997901	66012218	14318	1	55690	uc010rou.2	-36748	ENSG00000175115	PACS1	phosphofurin acidic cluster sorting protein 1
chr15	76933684	76934080	397	*	0.620801606	4.98E-05	0.005152789	Intron (uc010bkr.3/49855, intron 5 of 14)	15	76640527	77021078	380552	2	49855	uc010bkr.3	86998	ENSG00000140386	SCAPER	S-phase cyclin A associated protein in the ER
chr5	115345215	115345858	644	*	0.620770368	0.00035539	0.013838601	Intron (uc003kro.3/206338, intron 13 of 19)	5	115331074	115363299	32226	1	206338	uc003krs.3	14141	ENSG00000172901	LVRN	laeverin
chr3	17190468	17190946	479	*	0.620330468	7.35E-05	0.006316376	Distal Intergenic	3	17198654	17349626	150973	2	9779	uc010heu.3	158680	ENSG00000131374	TBC1D5	TBC1 domain family member 5
chr7	21914244	21914747	504	*	0.62015088	0.000833382	0.021956099	Intron (uc031swp.1/8701, intron 74 of 81)	7	21940517	21985542	45026	2	55536	uc003sve.4	70795	ENSG00000164649	CDCA7L	cell division cycle associated 7 like
chr11	60053440	60054053	614	*	0.619844284	6.26E-06	0.001721599	Intron (uc001noz.3/51338, intron 1 of 6)	11	60048014	60076445	28432	1	51338	uc001npc.3	5426	ENSG00000110079	MS4A4A	membrane spanning 4-domains A4A
chr7	81110850	81111494	645	*	0.619658292	0.000323419	0.013211606	Distal Intergenic	7	81331444	81399452	68009	2	3082	uc003uhl.3	287958	ENSG00000019991	HGF	hepatocyte growth factor
chr1	185001617	185002280	664	*	0.619621243	5.97E-05	0.005685717	Distal Intergenic	1	185014551	185071740	57190	1	6045	uc001grc.1	-12271	ENSG00000121481	RNF2	ring finger protein 2
chr10	90075396	90076048	653	*	0.619252654	1.60E-05	0.002717754	Intron (uc010qms.1/55328, intron 3 of 5)	10	90043859	90305279	261421	2	55328	uc009xtj.3	229231	ENSG00000184719	RNLS	renalase, FAD dependent amine oxidase
chr12	92432471	92433113	643	*	0.61902237	1.31E-06	0.000746239	Intron (uc031qiz.1/256021, intron 1 of 5)	12	92378752	92535489	156738	2	256021	uc031qiz.1	102376	ENSG00000257242	LINC01619	long intergenic non-protein coding RNA 1619
chr8	67597513	67597880	368	*	0.618972289	0.000371139	0.014222242	Intron (uc003xwp.3/100533105, intron 2 of 18)	8	67588454	67593377	4924	1	56260	uc003xwq.2	9059	ENSG00000104205	C8orf44	chromosome 8 open reading frame 44
chr15	57360117	57360528	412	*	0.618862796	0.000590454	0.018158908	Intron (uc010ugm.1/6938, intron 4 of 18)	15	57210833	57580714	369882	1	6938	uc010bfs.3	149284	ENSG00000140262	TCF12	transcription factor 12
chr2	3060462	3061140	679	*	0.618745365	0.000145538	0.008873502	Intron (uc002qxh.1/uc002qxh.1, intron 3 of 6)	2	3192741	3323445	130705	2	7260	uc002qxi.2	262305	ENSG00000032389	EIPR1	EARP complex and GARP complex interacting protein 1
chr11	64673411	64673923	513	*	0.618719277	1.46E-05	0.002591651	Promoter (2-3kb)	11	64662004	64670836	8833	2	23130	uc001obw.3	-2575	ENSG00000110046	ATG2A	autophagy related 2A
chr13	30468226	30468686	461	*	0.618702681	0.000146734	0.00889922	Distal Intergenic	13	30446750	30462542	15793	2	100874059	uc031qkw.1	-5684	ENSG00000224329	LINC00297	long intergenic non-protein coding RNA 297
chr6	146935061	146935392	332	*	0.618439863	0.000804574	0.021492729	Intron (uc003qlp.3/79747, intron 1 of 31)	6	146920136	147136597	216462	1	79747	uc010khx.3	14925	ENSG00000118492	ADGB	androglobin
chr7	41087135	41088099	965	*	0.618077856	1.94E-05	0.003073925	Distal Intergenic	7	40833056	40900366	67311	1	79783	uc003thp.2	254079	ENSG00000175600	SUGCT	succinyl-CoA:glutarate-CoA transferase
chr5	130916012	130916876	865	*	0.61805659	5.02E-05	0.0051744	Intron (uc003kvn.2/51735, intron 4 of 27)	5	130759614	130970929	211316	2	51735	uc003kvn.2	54053	ENSG00000158987	RAPGEF6	Rap guanine nucleotide exchange factor 6
chr8	74557460	74558255	796	*	0.617898913	5.33E-05	0.005344108	Intron (uc003xzm.3/27067, intron 6 of 14)	8	74461837	74650584	188748	2	27067	uc003xzo.3	92329	ENSG00000040341	STAU2	staufen double-stranded RNA binding protein 2
chr5	53853076	53853482	407	*	0.617818597	4.14E-05	0.004614654	Distal Intergenic	5	53813593	53842416	28824	1	112574	uc003jpi.4	39483	ENSG00000178996	SNX18	sorting nexin 18
chr10	28431488	28431971	484	*	0.617635576	0.000660248	0.019326122	Intron (uc009xkz.1/143098, intron 4 of 15)	10	28339923	28527664	187742	2	143098	uc009xkz.1	95693	ENSG00000150054	MPP7	membrane palmitoylated protein 7
chr3	32804558	32805119	562	*	0.617040918	0.00137853	0.028521652	3' UTR	3	32859510	32933771	74262	1	131405	uc003cff.3	-54391	ENSG00000206557	TRIM71	tripartite motif containing 71
chr12	31896362	31897121	760	*	0.616953528	4.42E-05	0.004796248	Distal Intergenic	12	31826486	31882108	55623	2	196394	uc009zjt.1	-14254	ENSG00000151743	AMN1	antagonist of mitotic exit network 1 homolog
chr16	54951459	54952024	566	*	0.616948508	0.000168753	0.009474689	Downstream (<1kb)	16	54952777	54962690	9914	2	643911	uc010vhb.3	10666	ENSG00000245694	CRNDE	colorectal neoplasia differentially expressed
chr1	98232336	98232782	447	*	0.616527807	6.55E-05	0.005957374	Intron (uc001drv.3/1806, intron 3 of 22)	1	97543300	98386615	843316	2	1806	uc001drv.3	153833	ENSG00000188641	DPYD	dihydropyrimidine dehydrogenase
chr5	64840142	64840705	564	*	0.615931428	3.41E-05	0.004172506	Intron (uc003jts.3/64105, intron 5 of 10)	5	64813593	64858995	45403	2	64105	uc003jts.3	18290	ENSG00000123219	CENPK	centromere protein K
chr20	57681810	57682347	538	*	0.615503137	0.001368493	0.028431034	Distal Intergenic	20	57608200	57617901	9702	2	51012	uc010zzv.2	-63909	ENSG00000101166	PRELID3B	PRELI domain containing 3B
chr6	17482730	17483384	655	*	0.615441479	1.54E-08	6.37E-05	Intron (uc010jpk.1/10486, intron 3 of 11)	6	17393736	17558023	164288	1	10486	uc011djd.2	88994	ENSG00000112186	CAP2	cyclase associated actin cytoskeleton regulatory protein 2
chr11	94303728	94304251	524	*	0.615230934	2.52E-05	0.003578566	Intron (uc010rue.1/143689, intron 2 of 14)	11	94300474	94354587	54114	1	143689	uc001pfa.3	3254	ENSG00000134627	PIWIL4	piwi like RNA-mediated gene silencing 4
chr14	54776401	54777234	834	*	0.615194887	3.54E-05	0.004253112	Distal Intergenic	14	54863673	54886934	23262	1	1033	uc001xap.3	-86439	ENSG00000100526	CDKN3	cyclin dependent kinase inhibitor 3
chr18	10191173	10191761	589	*	0.61508255	4.59E-05	0.004902576	Distal Intergenic	18	10454625	10488698	34074	1	147495	uc002kom.4	-262864	ENSG00000154856	APCDD1	APC down-regulated 1
chr7	72268210	72268840	631	*	0.615026983	0.00013346	0.008501328	Intron (uc011keh.1/441250, intron 3 of 13)	7	72023729	72298813	275085	2	441250	uc011keh.1	29973	ENSG00000277149	TYW1B	tRNA-yW synthesizing protein 1 homolog B
chr7	87771012	87771359	348	*	0.615019473	0.00276355	0.042246744	Intron (uc003ujk.2/53616, intron 14 of 28)	7	87834432	87849399	14968	2	6717	uc003ujq.2	78040	ENSG00000075142	SRI	sorcin
chr12	132155744	132156256	513	*	0.614828245	0.000496113	0.016722622	Distal Intergenic	12	132195632	132239044	43413	1	6433	uc001uiz.2	-39376	ENSG00000061936	SFSWAP	splicing factor SWAP
chr14	21393727	21394466	740	*	0.614825207	5.99E-05	0.005689838	Intron (uc010aif.2/6036, intron 1 of 1)	14	21387500	21388335	836	1	643332	uc021ror.1	6227	NA	ECRP	ribonuclease A family member 2 pseudogene
chr8	120777708	120778484	777	*	0.614762477	2.21E-06	0.001008698	Intron (uc003you.3/6873, intron 18 of 25)	8	120743014	120845074	102061	2	6873	uc003you.3	66590	ENSG00000064313	TAF2	TATA-box binding protein associated factor 2
chr14	67474507	67475406	900	*	0.614685262	3.30E-05	0.004095916	Intron (uc001xiw.3/10243, intron 9 of 10)	14	67656110	67667270	11161	1	161142	uc001xiz.3	-180704	ENSG00000172717	FAM71D	family with sequence similarity 71 member D
chr19	36701468	36701883	416	*	0.614374656	0.000113406	0.007839648	Intron (uc002odn.3/147929, intron 1 of 4)	19	36705504	36729675	24172	1	7705	uc002odq.4	-3621	ENSG00000167635	ZNF146	zinc finger protein 146
chr2	225699434	225700411	978	*	0.614363821	1.67E-06	0.000860942	Intron (uc002vob.2/55619, intron 25 of 55)	2	225651739	225681430	29692	2	55619	uc002voc.2	-18004	ENSG00000135905	DOCK10	dedicator of cytokinesis 10
chr13	41696672	41697322	651	*	0.614350031	0.000203363	0.010352684	Distal Intergenic	13	41701709	41706936	5228	2	89890	uc001uxu.1	9614	ENSG00000165572	KBTBD6	kelch repeat and BTB domain containing 6
chr7	65501202	65502049	848	*	0.61434044	4.55E-06	0.001462571	Distal Intergenic	7	65540776	65552249	11474	1	435	uc011kdu.1	-38727	ENSG00000126522	ASL	argininosuccinate lyase
chr5	70789961	70790647	687	*	0.613971606	9.65E-05	0.007185188	Intron (uc003kbn.1/55814, intron 11 of 16)	5	70818154	70863649	45496	1	55814	uc003kbq.1	-27507	ENSG00000145734	BDP1	B double prime 1, subunit of RNA polymerase III transcription initiation factor IIIB
chr1	5220462	5220926	465	*	0.613946661	0.00162084	0.031144551	Distal Intergenic	1	5624131	5624203	73	1	100616489	uc021ofm.1	-403205	NA	NA	NA
chr5	127814655	127815162	508	*	0.613841383	3.68E-05	0.004336724	Intron (uc003kuu.3/2201, intron 5 of 64)	5	127593601	127873735	280135	2	2201	uc003kuu.3	58573	ENSG00000138829	FBN2	fibrillin 2
chr2	102545634	102546120	487	*	0.613809941	0.000682733	0.019744694	Distal Intergenic	2	102608306	102641218	32913	1	7850	uc002tbo.2	-62186	ENSG00000115590	IL1R2	interleukin 1 receptor type 2
chr4	175503353	175504098	746	*	0.613675056	5.00E-06	0.001527096	Distal Intergenic	4	175411328	175444049	32722	2	3248	uc011ckg.2	-59304	ENSG00000164120	HPGD	15-hydroxyprostaglandin dehydrogenase
chr22	19325187	19325679	493	*	0.613618073	0.000967178	0.023794236	Intron (uc002zpf.1/7290, intron 24 of 24)	22	19168244	19279239	110996	2	8218	uc011agw.1	-45948	ENSG00000070371	CLTCL1	clathrin heavy chain like 1
chr10	28309414	28309991	578	*	0.613492938	0.000372012	0.014228709	Distal Intergenic	10	28101097	28287977	186881	2	55130	uc001itz.3	-21437	ENSG00000169126	ARMC4	armadillo repeat containing 4
chr9	78711915	78712768	854	*	0.613462307	0.000146663	0.00889922	Intron (uc004ajy.2/5125, intron 8 of 13)	9	78796314	78808346	12033	1	5125	uc004akb.3	-83546	ENSG00000099139	PCSK5	proprotein convertase subtilisin/kexin type 5
chr6	144845018	144845371	354	*	0.613138097	0.000200925	0.010273068	Intron (uc003qkt.3/7402, intron 40 of 73)	6	144612873	145174170	561298	1	7402	uc003qkt.3	232145	ENSG00000152818	UTRN	utrophin
chr5	178321479	178321902	424	*	0.612988739	8.51E-05	0.006741292	Promoter (1-2kb)	5	178322916	178360210	37295	1	80108	uc003mjn.1	-1014	ENSG00000198939	ZFP2	ZFP2 zinc finger protein
chr2	172517993	172518467	475	*	0.612860257	0.000229497	0.010963956	Distal Intergenic	2	172543919	172606668	62750	1	1781	uc002uha.2	-25452	ENSG00000077380	DYNC1I2	dynein cytoplasmic 1 intermediate chain 2
chr12	28380208	28380606	399	*	0.612582545	0.000178866	0.009741282	Intron (uc001rio.3/55297, intron 2 of 14)	12	28408937	28703099	294163	1	55297	uc009zjk.3	-28331	ENSG00000123106	CCDC91	coiled-coil domain containing 91
chr12	92405473	92405965	493	*	0.612553747	0.000188812	0.009932329	Intron (uc031qiz.1/256021, intron 1 of 5)	12	92378752	92535489	156738	2	256021	uc031qiz.1	129524	ENSG00000257242	LINC01619	long intergenic non-protein coding RNA 1619
chr11	20099418	20099945	528	*	0.612119708	0.000731894	0.02041341	Exon (uc001mpp.3/89797, exon 24 of 38)	11	20077245	20143147	65903	1	89797	uc001mpu.3	22173	ENSG00000166833	NAV2	neuron navigator 2
chr6	113801320	113801796	477	*	0.612059287	0.000488631	0.016613277	Distal Intergenic	6	114178527	114184652	6126	1	4082	uc003pvy.4	-376731	ENSG00000277443	MARCKS	myristoylated alanine rich protein kinase C substrate
chr12	9777700	9778115	416	*	0.611949024	0.000414484	0.015119581	Intron (uc031qfy.1/374443, intron 1 of 4)	12	9769880	9811010	41131	1	374443	uc031qfy.1	7820	ENSG00000256594	LOC374443	C-type lectin domain family 2 member D pseudogene
chr20	43567228	43567689	462	*	0.611875855	9.22E-07	0.000637912	3' UTR	20	43560820	43587799	26980	1	80336	uc002xmx.3	6408	ENSG00000101104	PABPC1L	poly(A) binding protein cytoplasmic 1 like
chr3	30781563	30782406	844	*	0.611742684	9.57E-09	5.30E-05	Intron (uc003cep.2/339896, intron 14 of 14)	3	30647994	30735633	87640	1	7048	uc003ceo.3	133569	ENSG00000163513	TGFBR2	transforming growth factor beta receptor 2
chr1	185421428	185421769	342	*	0.611575754	0.000406739	0.014970585	Distal Intergenic	1	185292979	185304171	11193	2	100288079	uc001grn.4	-117257	ENSG00000261024	GS1-279B7.1	microtubule associated protein 1 light chain 3 beta pseudogene
chr1	31873604	31874261	658	*	0.610588766	0.001259652	0.027342937	Distal Intergenic	1	31882412	31907527	25116	1	347735	uc021okm.1	-8151	ENSG00000168528	SERINC2	serine incorporator 2
chr6	47112059	47112414	356	*	0.610497259	0.000147489	0.00889922	Distal Intergenic	6	46984353	47010082	25730	2	266977	uc003oyu.1	-101977	ENSG00000153292	ADGRF1	adhesion G protein-coupled receptor F1
chr5	17486499	17487079	581	*	0.610398909	0.001353187	0.028297975	Distal Intergenic	5	17379015	17387419	8405	2	401177	uc003jga.3	-99080	ENSG00000250822	LINC02111	long intergenic non-protein coding RNA 2111
chr18	62045328	62045957	630	*	0.61019209	0.000554376	0.017733423	Intron (uc002ljx.3/284294, intron 5 of 9)	18	61880318	61927290	46973	2	400654	uc002ljy.3	-118038	ENSG00000266952	LINC01538	long intergenic non-protein coding RNA 1538
chr2	197084195	197084883	689	*	0.609915608	5.75E-07	0.000505841	Exon (uc002utl.1/57520, exon 24 of 27)	2	196998307	197041227	42921	2	9262	uc010fsh.3	-42968	ENSG00000081320	STK17B	serine/threonine kinase 17b
chr5	162919796	162920573	778	*	0.609901871	8.03E-05	0.006599943	Exon (uc003lzi.3/uc003lzi.3, exon 2 of 4)	5	162930070	162946359	16290	1	27430	uc003lzj.4	-9497	ENSG00000038274	MAT2B	methionine adenosyltransferase 2B
chr1	207680361	207681018	658	*	0.609897446	8.63E-05	0.006772027	3' UTR	1	207669473	207815110	145638	1	1378	uc021pij.1	10888	ENSG00000203710	CR1	complement C3b/C4b receptor 1 (Knops blood group)
chr19	55383876	55384485	610	*	0.609895712	0.000217795	0.010716287	Promoter (1-2kb)	19	55385549	55400436	14888	1	2204	uc021vbp.1	-1064	ENSG00000186431	FCAR	Fc fragment of IgA receptor
chr19	40830899	40831319	421	*	0.609873292	0.000295775	0.012625041	Intron (uc002ong.4/126526, intron 7 of 8)	19	40826967	40847797	20831	2	126526	uc002ong.4	16478	ENSG00000160392	C19orf47	chromosome 19 open reading frame 47
chr2	136528817	136529638	822	*	0.609621308	2.24E-07	0.000305445	Intron (uc002tur.3/23190, intron 8 of 12)	2	136533622	136542633	9012	1	23190	uc002tut.3	-3984	ENSG00000144224	UBXN4	UBX domain protein 4
chr15	99894611	99895227	617	*	0.60958936	3.79E-06	0.001312588	Intron (uc010urs.1/123355, intron 7 of 9)	15	99797730	99800481	2752	1	7190	uc031quj.1	96881	ENSG00000259706	HSP90B2P	heat shock protein 90 beta family member 2, pseudogene
chr5	66740085	66740647	563	*	0.609458139	1.36E-05	0.002513899	Distal Intergenic	5	66478104	66492617	14514	2	4064	uc003juy.2	-247468	ENSG00000134061	CD180	CD180 molecule
chr4	89639780	89640408	629	*	0.609269481	0.00013593	0.008565214	Promoter (2-3kb)	4	89642866	89651254	8389	1	285512	uc003hrz.1	-2458	ENSG00000248019	FAM13A-AS1	FAM13A antisense RNA 1
chr1	213255384	213255916	533	*	0.608583724	8.36E-05	0.006680053	Intron (uc001hkd.3/26750, intron 2 of 13)	1	213246212	213446808	200597	1	26750	uc001hke.3	9172	ENSG00000136643	RPS6KC1	ribosomal protein S6 kinase C1
chr2	37472886	37473418	533	*	0.608338215	0.000126371	0.008342882	Exon (uc010ynj.1/55471, exon 7 of 8)	2	37468721	37476303	7583	1	55471	uc010fah.3	4165	ENSG00000003509	NDUFAF7	NADH:ubiquinone oxidoreductase complex assembly factor 7
chr13	77651128	77651552	425	*	0.608133282	7.96E-05	0.006562955	Promoter (1-2kb)	13	77649649	77661911	12263	1	100874212	uc031qmj.1	1479	ENSG00000236051	MYCBP2-AS1	MYCBP2 antisense RNA 1
chr10	8186139	8187109	971	*	0.608132875	4.41E-07	0.000440879	Distal Intergenic	10	8096667	8117164	20498	1	2625	uc001ika.3	89472	ENSG00000107485	GATA3	GATA binding protein 3
chr6	158543394	158544101	708	*	0.607666691	5.43E-05	0.005410256	Intron (uc003qrb.2/84947, intron 11 of 17)	6	158566952	158580331	13380	2	84947	uc031sqr.1	36230	ENSG00000122335	SERAC1	serine active site containing 1
chr20	3921560	3922106	547	*	0.607601019	1.39E-05	0.002545278	Intron (uc002wkh.2/11237, intron 4 of 5)	20	3898149	3898210	62	2	100302282	uc021wac.1	-23350	ENSG00000283320	MIR103B2	microRNA 103b-2
chr5	61789532	61789986	455	*	0.607541775	0.000158303	0.009215976	Exon (uc003jtc.3/51194, exon 16 of 30)	5	61800685	61876507	75823	1	51194	uc003jtd.1	-10699	ENSG00000086200	IPO11	importin 11
chr11	82458496	82459029	534	*	0.607422328	0.00081698	0.021723857	Distal Intergenic	11	82443046	82444906	1861	2	220382	uc001ozp.3	-13590	ENSG00000182103	FAM181B	family with sequence similarity 181 member B
chr6	74348781	74349274	494	*	0.607393559	6.44E-06	0.001757208	Intron (uc003phn.4/26503, intron 3 of 10)	6	74303102	74345223	42122	2	26503	uc010kax.3	-3558	ENSG00000119899	SLC17A5	solute carrier family 17 member 5
chr2	103104870	103105393	524	*	0.60736936	0.003942603	0.051572338	Intron (uc002tbz.4/389015, intron 2 of 11)	2	103089762	103150431	60670	1	389015	uc002tbz.4	15108	ENSG00000180251	SLC9A4	solute carrier family 9 member A4
chr18	47885485	47886023	539	*	0.607323816	0.002202747	0.037190644	Distal Intergenic	18	47901392	47920538	19147	1	220134	uc002let.3	-15369	ENSG00000154839	SKA1	spindle and kinetochore associated complex subunit 1
chr1	247224058	247224610	553	*	0.607254138	2.13E-05	0.003251495	Intron (uc001ica.3/100533111, intron 1 of 6)	1	247108849	247242115	133267	2	100533111	uc001ica.3	17505	ENSG00000135747	ZNF670-ZNF695	ZNF670-ZNF695 readthrough (NMD candidate)
chr2	240568614	240569397	784	*	0.606894787	1.04E-06	0.000693708	Distal Intergenic	2	240684554	240722356	37803	1	150935	uc021vzc.2	-115157	NA	LOC150935	uncharacterized LOC150935
chr15	40262170	40262744	575	*	0.606848114	1.82E-05	0.002973995	Intron (uc001zkl.3/440275, intron 9 of 10)	15	40247821	40327797	79977	1	440275	uc010bbj.1	14349	ENSG00000128829	EIF2AK4	eukaryotic translation initiation factor 2 alpha kinase 4
chr12	76739890	76740384	495	*	0.606827012	1.68E-05	0.002816454	Promoter (1-2kb)	12	76738266	76742222	3957	2	79738	uc001syd.1	1838	ENSG00000179941	BBS10	Bardet-Biedl syndrome 10
chr3	20196457	20196958	502	*	0.606793208	2.46E-05	0.003523588	Distal Intergenic	3	20215736	20227919	12184	1	100874028	uc031ryq.1	-18778	ENSG00000231304	SGO1-AS1	SGO1 antisense RNA 1
chr2	12051030	12051545	516	*	0.606546735	4.92E-05	0.005093442	Distal Intergenic	2	11977059	11977112	54	2	100422996	uc021vea.1	-73918	ENSG00000265172	MIR4262	microRNA 4262
chr1	163131567	163132020	454	*	0.606502733	0.000146212	0.00889922	5' UTR	1	163112089	163172963	60875	2	8490	uc001gcn.3	40943	ENSG00000143248	RGS5	regulator of G protein signaling 5
chr12	129415017	129415861	845	*	0.605890946	6.69E-05	0.006010414	Intron (uc001uhx.1/144423, intron 4 of 7)	12	129348681	129469509	120829	1	144423	uc010tbh.1	66336	ENSG00000151948	GLT1D1	glycosyltransferase 1 domain containing 1
chr4	75279799	75280408	610	*	0.60583179	0.000141797	0.008753203	Distal Intergenic	4	75310853	75490485	179633	1	374	uc021xpc.1	-30445	ENSG00000109321	AREG	amphiregulin
chr1	156245744	156246336	593	*	0.605819615	0.002500227	0.039961586	Intron (uc001foc.4/23381, intron 4 of 21)	1	156219015	156252620	33606	2	23381	uc001foc.4	6284	ENSG00000198952	SMG5	SMG5 nonsense mediated mRNA decay factor
chr7	87499080	87499442	363	*	0.605742314	6.31E-05	0.005830032	Intron (uc003uje.3/55972, intron 1 of 11)	7	87505544	87538856	33313	1	10926	uc003ujf.1	-6102	ENSG00000006634	DBF4	DBF4 zinc finger
chr3	184784888	184785347	460	*	0.605272102	4.99E-05	0.005157862	Distal Intergenic	3	184795838	184870802	74965	2	285382	uc003fpd.3	85455	ENSG00000187068	C3orf70	chromosome 3 open reading frame 70
chr14	52868362	52869233	872	*	0.60512321	0.000204227	0.010391078	Distal Intergenic	14	52781016	52795322	14307	1	5732	uc001wzr.3	87346	ENSG00000125384	PTGER2	prostaglandin E receptor 2
chr3	75296130	75296681	552	*	0.605013802	0.001043361	0.024724493	Distal Intergenic	3	75263627	75263699	73	1	100616394	uc031sao.1	32503	ENSG00000284252	MIR4444-1	microRNA 4444-1
chr17	78508364	78509255	892	*	0.604884648	0.001415661	0.028933552	Distal Intergenic	17	78518625	78797422	278798	1	57521	uc002jys.3	-9370	ENSG00000141564	RPTOR	regulatory associated protein of MTOR complex 1
chr7	7650188	7650623	436	*	0.604861849	0.000348616	0.013693846	Distal Intergenic	7	7625267	7647110	21844	1	54468	uc010ktq.3	24921	ENSG00000164654	MIOS	meiosis regulator for oocyte development
chr5	146616113	146616649	537	*	0.604564936	0.000335308	0.013437936	Promoter (1-2kb)	5	146614579	146764241	149663	1	202374	uc011dbw.1	1534	ENSG00000169302	STK32A	serine/threonine kinase 32A
chr2	127503074	127503593	520	*	0.604421733	0.003630154	0.049037058	Distal Intergenic	2	127413511	127454251	40741	1	2995	uc010flv.4	89563	ENSG00000136732	GYPC	glycophorin C (Gerbich blood group)
chr5	145407290	145407731	442	*	0.604295525	8.32E-05	0.006673066	Intron (uc003lnt.3/153769, intron 5 of 9)	5	145429633	145439787	10155	1	153769	uc011dbm.1	-21902	ENSG00000156463	SH3RF2	SH3 domain containing ring finger 2
chr2	208795937	208796703	767	*	0.603323156	2.73E-06	0.00111566	Intron (uc002vcl.2/389072, intron 4 of 7)	2	208686012	208890284	204273	2	389072	uc002vcl.2	93581	ENSG00000178385	PLEKHM3	pleckstrin homology domain containing M3
chr3	73033790	73034548	759	*	0.603317173	0.000258274	0.011686176	Distal Intergenic	3	73046119	73115011	68893	1	151987	uc003dph.1	-11571	ENSG00000163605	PPP4R2	protein phosphatase 4 regulatory subunit 2
chr1	41680433	41680798	366	*	0.603290491	0.001958368	0.034774895	Intron (uc001cgq.3/22955, intron 1 of 14)	1	41492871	41707815	214945	2	22955	uc001cgq.3	27017	ENSG00000010803	SCMH1	Scm polycomb group protein homolog 1
chr14	75729038	75729408	371	*	0.603234848	0.000286885	0.012435387	Distal Intergenic	14	75745481	75748937	3457	1	2353	uc001xrn.3	-16073	ENSG00000170345	FOS	Fos proto-oncogene, AP-1 transcription factor subunit
chr15	77297955	77298674	720	*	0.602872903	0.000129091	0.008407941	Intron (uc010bkt.1/9051, intron 2 of 15)	15	77287746	77329671	41926	1	9051	uc010bkw.1	10209	ENSG00000140368	PSTPIP1	proline-serine-threonine phosphatase interacting protein 1
chr18	22063544	22064221	678	*	0.602850235	0.001264299	0.027387232	Distal Intergenic	18	22040593	22059921	19329	1	59340	uc010xbd.2	22951	ENSG00000134489	HRH4	histamine receptor H4
chr9	96540528	96541490	963	*	0.602807076	0.001873258	0.033921969	Distal Intergenic	9	96581639	96581703	65	1	100422927	uc022bkd.1	-40149	ENSG00000265347	MIR4291	microRNA 4291
chr10	27601675	27602235	561	*	0.602706169	0.001017794	0.024414006	Distal Intergenic	10	27534782	27541235	6454	2	387646	uc001its.2	-60440	ENSG00000230445	LRRC37A6P	leucine rich repeat containing 37 member A6, pseudogene
chr15	41355662	41356163	502	*	0.602562385	9.03E-06	0.002046882	Intron (uc001zni.3/54617, intron 14 of 35)	15	41271079	41408340	137262	2	54617	uc001zni.3	52177	ENSG00000128908	INO80	INO80 complex ATPase subunit
chr5	79355182	79355979	798	*	0.602546054	5.06E-05	0.005203469	Exon (uc021yaw.1/7060, exon 6 of 22)	5	79331170	79379107	47938	1	7060	uc021yaw.1	24012	ENSG00000113296	THBS4	thrombospondin 4
chr3	43589134	43589719	586	*	0.602544281	8.24E-05	0.006673066	Intron (uc003cmv.3/55129, intron 11 of 12)	3	43407818	43663560	255743	2	55129	uc003cmv.3	73841	ENSG00000160746	ANO10	anoctamin 10
chr6	75948390	75948998	609	*	0.602519979	2.31E-05	0.003399882	Intron (uc003phv.2/1347, intron 3 of 3)	6	75947391	75953644	6254	2	1347	uc003phv.2	4646	ENSG00000112695	COX7A2	cytochrome c oxidase subunit 7A2
chr12	15700013	15700533	521	*	0.60234131	0.000553669	0.017716832	Promoter (<=1kb)	12	15699278	15751265	51988	1	5800	uc001rda.2	735	ENSG00000151490	PTPRO	protein tyrosine phosphatase receptor type O
chr1	59962899	59963862	964	*	0.602030179	1.47E-06	0.000793714	Intron (uc001czg.2/55277, intron 5 of 8)	1	59981301	60228402	247102	1	55277	uc001czm.5	-17439	ENSG00000172456	FGGY	FGGY carbohydrate kinase domain containing
chr15	31479112	31479818	707	*	0.601949811	0.001258032	0.027326681	Distal Intergenic	15	31293264	31453476	160213	2	4308	uc021sia.1	-25636	ENSG00000134160	TRPM1	transient receptor potential cation channel subfamily M member 1
chr1	52704928	52705514	587	*	0.601919787	0.000238987	0.011202386	Exon (uc001ctn.4/9372, exon 4 of 5)	1	52607766	52812358	204593	1	9372	uc001ctp.4	97162	ENSG00000157077	ZFYVE9	zinc finger FYVE-type containing 9
chr2	190669994	190670636	643	*	0.601884774	0.000265511	0.011883181	3' UTR	2	190682743	190742355	59613	1	5378	uc002url.3	-12107	ENSG00000064933	PMS1	PMS1 homolog 1, mismatch repair system component
chr13	96870577	96871070	494	*	0.601781014	0.001256956	0.027326297	Intron (uc001vmw.4/266722, intron 1 of 1)	13	96743093	97491816	748724	1	266722	uc001vmw.4	127484	ENSG00000185352	HS6ST3	heparan sulfate 6-O-sulfotransferase 3
chr3	149941286	149941770	485	*	0.601696724	0.00019319	0.010038387	Distal Intergenic	3	150126788	150177615	50828	1	9819	uc003exv.3	-185018	ENSG00000196428	TSC22D2	TSC22 domain family member 2
chr4	74690705	74691555	851	*	0.601587503	0.000239249	0.011209094	Distal Intergenic	4	74702273	74704477	2205	1	6372	uc003hhf.3	-10718	ENSG00000124875	CXCL6	C-X-C motif chemokine ligand 6
chr6	64509763	64510268	506	*	0.601449065	3.07E-05	0.00396933	Intron (uc011dxt.1/346007, intron 17 of 23)	6	64356432	64424405	67974	1	23469	uc003pep.1	153331	ENSG00000118482	PHF3	PHD finger protein 3
chr4	2144902	2145496	595	*	0.601249237	0.000396183	0.014755226	Intron (uc010icg.1/353497, intron 3 of 12)	4	2073645	2160938	87294	2	353497	uc010icg.1	15442	ENSG00000130997	POLN	DNA polymerase nu
chr1	20214187	20214641	455	*	0.601211338	1.09E-05	0.002250995	Intron (uc001bcs.4/23252, intron 1 of 7)	1	20208888	20239437	30550	1	23252	uc001bcs.4	5299	ENSG00000169914	OTUD3	OTU deubiquitinase 3
chr12	123688443	123688996	554	*	0.601187364	0.000187486	0.009932329	Intron (uc001uel.3/10198, intron 4 of 19)	12	123640946	123706442	65497	2	10198	uc001uel.3	17446	ENSG00000051825	MPHOSPH9	M-phase phosphoprotein 9
chr1	155208535	155209061	527	*	0.601171593	0.001039566	0.024646986	Promoter (<=1kb)	1	155186648	155208441	21794	2	2630	uc021pau.2	-94	ENSG00000160766	GBAP1	glucosylceramidase beta pseudogene 1
chr11	47343812	47344318	507	*	0.60114706	3.61E-06	0.001287318	Intron (uc001neq.2/8567, intron 27 of 32)	11	47357129	47364696	7568	2	4607	uc010rhl.2	20378	ENSG00000134571	MYBPC3	myosin binding protein C, cardiac
chr6	90721981	90722622	642	*	0.601141808	6.75E-05	0.006028128	Intron (uc003pnw.3/60468, intron 3 of 6)	6	90604188	90605819	1632	1	84694	uc011eaa.2	117793	ENSG00000135355	GJA10	gap junction protein alpha 10
chr2	40742266	40742658	393	*	0.600723562	0.000293121	0.012574541	Promoter (2-3kb)	2	40655613	40739575	83963	2	6546	uc002rsc.1	-2691	ENSG00000183023	SLC8A1	solute carrier family 8 member A1
chr1	59853673	59854356	684	*	0.600693378	4.95E-07	0.000470307	Intron (uc001czg.2/55277, intron 4 of 8)	1	59775750	60228402	452653	1	55277	uc001czl.4	77923	ENSG00000172456	FGGY	FGGY carbohydrate kinase domain containing
chr2	176476774	176477710	937	*	0.600532971	0.000110065	0.007721557	Distal Intergenic	2	176790410	176867018	76609	2	80856	uc002ukc.1	389308	ENSG00000144320	LNPK	lunapark, ER junction formation factor
chr7	76768667	76768971	305	*	0.600504127	4.68E-05	0.004967765	Intron (uc003uga.3/57639, intron 1 of 18)	7	76751934	76924521	172588	1	57639	uc003uga.3	16733	ENSG00000135205	CCDC146	coiled-coil domain containing 146
chr7	66183404	66184366	963	*	0.600306011	1.22E-07	0.000201194	Intron (uc003tvf.3/27342, intron 3 of 12)	7	66204983	66276448	71466	1	27342	uc003tvh.3	-20617	ENSG00000154710	RABGEF1	RAB guanine nucleotide exchange factor 1
chr3	3922660	3923323	664	*	0.600086566	0.001249679	0.027277515	Intron (uc003bps.2/285362, intron 9 of 12)	3	3841121	3889387	48267	1	57633	uc003bpt.4	81539	ENSG00000175928	LRRN1	leucine rich repeat neuronal 1
chr4	144448740	144449270	531	*	0.600082221	2.86E-05	0.003824303	Exon (uc003ijg.3/8467, exon 7 of 24)	4	144434616	144478642	44027	1	8467	uc003ijg.3	14124	ENSG00000153147	SMARCA5	SWI/SNF related, matrix associated, actin dependent regulator of chromatin, subfamily a, member 5
chr8	122427723	122428315	593	*	0.600032474	8.65E-05	0.006779466	Distal Intergenic	8	122651586	122657564	5979	1	594842	uc022baf.1	-223271	NA	HAS2-AS1	HAS2 antisense RNA 1
chr4	86442389	86443063	675	*	0.600028174	0.000735905	0.020467239	Intron (uc003hpi.1/83478, intron 1 of 2)	4	86396284	86923823	527540	1	83478	uc003hpk.3	46105	ENSG00000138639	ARHGAP24	Rho GTPase activating protein 24
chr2	223801952	223802365	414	*	0.600003762	0.006286117	0.066671815	Intron (uc002vni.3/2181, intron 16 of 16)	2	223725732	223808119	82388	1	2181	uc002vnj.3	76220	ENSG00000123983	ACSL3	acyl-CoA synthetase long chain family member 3
chr10	99580006	99580624	619	*	0.599807735	0.000935527	0.023357856	Distal Intergenic	10	99609995	99631335	21341	1	401647	uc001kos.3	-29371	ENSG00000155265	GOLGA7B	golgin A7 family member B
chr2	43987105	43987927	823	*	0.599751645	0.002706985	0.041748364	Intron (uc010yny.2/130271, intron 27 of 29)	2	44001178	44022316	21139	1	51626	uc002rth.3	-13251	ENSG00000138036	DYNC2LI1	dynein cytoplasmic 2 light intermediate chain 1
chr7	111715272	111715750	479	*	0.599751068	7.38E-06	0.001881112	Intron (uc003vfx.3/9732, intron 1 of 51)	7	111366164	111846462	480299	2	9732	uc003vfx.3	130712	ENSG00000128512	DOCK4	dedicator of cytokinesis 4
chr9	101233037	101233682	646	*	0.59966187	8.11E-05	0.006633214	Intron (uc004ays.3/9568, intron 6 of 18)	9	100961280	101018003	56724	2	55357	uc011lvb.2	-215034	ENSG00000095383	TBC1D2	TBC1 domain family member 2
chr16	58939085	58939746	662	*	0.59936805	0.000653462	0.019193216	Intron (uc031qwk.1/uc031qwk.1, intron 2 of 3)	16	58741035	58768246	27212	2	2806	uc010vim.1	-170839	ENSG00000125166	GOT2	glutamic-oxaloacetic transaminase 2
chr3	52667143	52667697	555	*	0.599056325	2.99E-05	0.003920084	Intron (uc003deq.2/55193, intron 11 of 27)	3	52643102	52649472	6371	2	55193	uc003dfc.3	-17671	ENSG00000163939	PBRM1	polybromo 1
chr10	15752514	15753404	891	*	0.598869301	0.001350767	0.028289435	Intron (uc001ioc.1/8516, intron 2 of 29)	10	15559088	15761770	202683	2	8516	uc001ioc.1	8366	ENSG00000077943	ITGA8	integrin subunit alpha 8
chr5	102364476	102365029	554	*	0.598807069	1.36E-05	0.002513899	3' UTR	5	102343161	102366808	23648	1	5066	uc003knz.3	21315	ENSG00000145730	PAM	peptidylglycine alpha-amidating monooxygenase
chr1	1652390	1653068	679	*	0.598802357	0.000202263	0.010319014	Promoter (2-3kb)	1	1647785	1655471	7687	2	984	uc001ahu.1	2403	ENSG00000248333	CDK11B	cyclin dependent kinase 11B
chr13	77636450	77637148	699	*	0.59874402	1.66E-06	0.000860942	Exon (uc001vke.3/23077, exon 16 of 25)	13	77649649	77661911	12263	1	100874212	uc031qmj.1	-12501	ENSG00000236051	MYCBP2-AS1	MYCBP2 antisense RNA 1
chr15	93841727	93842556	830	*	0.598558948	8.38E-05	0.006682857	Distal Intergenic	15	93586636	93632443	45808	2	56963	uc002bss.2	-209284	ENSG00000182175	RGMA	repulsive guidance molecule BMP co-receptor a
chr3	172087331	172087700	370	*	0.598538204	3.53E-05	0.004250339	Intron (uc003fhy.3/64778, intron 23 of 25)	3	172161081	172166246	5166	2	2693	uc003fib.2	78546	ENSG00000121853	GHSR	growth hormone secretagogue receptor
chr6	147476050	147476413	364	*	0.598491694	0.000716599	0.02024488	Intron (uc003qlt.2/729178, intron 3 of 10)	6	147182942	147453122	270181	2	729178	uc003qlv.3	-22928	ENSG00000233452	STXBP5-AS1	STXBP5 antisense RNA 1
chr3	44687817	44688366	550	*	0.598317017	2.61E-05	0.003630253	Promoter (1-2kb)	3	44690233	44702283	12051	1	7584	uc003cnq.3	-1867	ENSG00000169981	ZNF35	zinc finger protein 35
chr13	53524735	53525376	642	*	0.598263492	0.000901621	0.022918628	Distal Intergenic	13	53602876	53626184	23309	1	10562	uc001vhk.2	-77500	ENSG00000102837	OLFM4	olfactomedin 4
chr3	188576569	188577287	719	*	0.598137711	2.97E-05	0.00390315	Intron (uc011bsg.2/4026, intron 7 of 9)	3	188665003	189041271	376269	1	285386	uc003frv.2	-87716	ENSG00000188001	TPRG1	tumor protein p63 regulated 1
chr1	68913667	68914527	861	*	0.598017458	0.000423356	0.015312423	Promoter (1-2kb)	1	68894507	68915642	21136	2	6121	uc001dei.1	1115	ENSG00000116745	RPE65	retinoid isomerohydrolase RPE65
chr10	112583510	112584055	546	*	0.597685415	0.000224111	0.010857781	Intron (uc001kzf.2/282996, intron 12 of 13)	10	112628648	112630662	2015	2	282997	uc010qrd.1	46607	NA	PDCD4-AS1	PDCD4 antisense RNA 1
chr19	15717768	15718381	614	*	0.597127796	0.006469072	0.067702577	Distal Intergenic	19	15726029	15730572	4544	1	11283	uc010xoi.1	-7648	ENSG00000186526	CYP4F8	cytochrome P450 family 4 subfamily F member 8
chr1	45962589	45963198	610	*	0.597079494	0.000281082	0.012285482	Promoter (1-2kb)	1	45959598	45964294	4697	2	126661	uc001cnt.3	1096	ENSG00000280670	CCDC163	coiled-coil domain containing 163
chr8	109168421	109168864	444	*	0.596939507	0.008000254	0.076560043	Distal Intergenic	8	108911544	109095913	184370	2	340419	uc003yms.3	-72508	ENSG00000147655	RSPO2	R-spondin 2
chr8	68577130	68577702	573	*	0.596910052	0.000236108	0.011134016	Intron (uc003xxq.4/57094, intron 1 of 10)	8	68334405	68658620	324216	2	57094	uc003xxq.4	80918	ENSG00000165078	CPA6	carboxypeptidase A6
chr2	16942979	16943472	494	*	0.596775541	4.71E-05	0.004980139	Distal Intergenic	2	16730730	16847134	116405	2	81553	uc002rck.2	-95845	ENSG00000197872	FAM49A	family with sequence similarity 49 member A
chr17	28137880	28138528	649	*	0.596758854	7.51E-05	0.006368123	Intron (uc002heo.1/85464, intron 1 of 14)	17	28000930	28088408	87479	2	85464	uc002heq.3	-49472	ENSG00000141298	SSH2	slingshot protein phosphatase 2
chr17	54170632	54171324	693	*	0.596646754	1.80E-05	0.002960271	Distal Intergenic	17	54230836	54560007	329172	1	162282	uc002iun.1	-59512	ENSG00000153930	ANKFN1	ankyrin repeat and fibronectin type III domain containing 1
chr2	103572961	103573825	865	*	0.596613781	1.55E-05	0.002672173	Distal Intergenic	2	103414225	103434138	19914	1	130827	uc010ywe.3	158736	ENSG00000170417	TMEM182	transmembrane protein 182
chr8	17619821	17620684	864	*	0.596530567	0.000717936	0.020265835	Intron (uc003wxv.3/57509, intron 1 of 14)	8	17501303	17613470	112168	2	57509	uc010lsy.3	-6351	ENSG00000129422	MTUS1	microtubule associated scaffold protein 1
chr11	105941423	105941761	339	*	0.596347744	0.000222527	0.010847461	Intron (uc001pja.3/143879, intron 2 of 3)	11	105948292	105969419	21128	1	60496	uc001pjc.1	-6531	ENSG00000149313	AASDHPPT	aminoadipate-semialdehyde dehydrogenase-phosphopantetheinyl transferase
chr3	171637306	171637739	434	*	0.596082889	0.00051381	0.017045964	Distal Intergenic	3	171561139	171577108	15970	1	389177	uc003fhw.2	76167	ENSG00000186329	TMEM212	transmembrane protein 212
chr8	103836617	103837169	553	*	0.596080707	0.000109712	0.007708302	Downstream (1-2kb)	8	103838536	103876397	37862	2	51582	uc003ykx.3	39228	ENSG00000155096	AZIN1	antizyme inhibitor 1
chr11	78288464	78289051	588	*	0.595645785	5.29E-05	0.00532289	Promoter (2-3kb)	11	78147007	78285909	138903	2	79731	uc010rsq.2	-2555	ENSG00000137513	NARS2	asparaginyl-tRNA synthetase 2, mitochondrial
chr8	6229788	6230547	760	*	0.595523311	0.000254437	0.011575274	Distal Intergenic	8	6261077	6264069	2993	2	100287015	uc003wqf.3	33522	ENSG00000246089	LOC100287015	uncharacterized LOC100287015
chr20	13793797	13794643	847	*	0.595499809	3.96E-05	0.004534712	Intron (uc002wom.3/79133, intron 8 of 10)	20	13765672	13799067	33396	1	79133	uc002woo.3	28125	ENSG00000101247	NDUFAF5	NADH:ubiquinone oxidoreductase complex assembly factor 5
chr3	154289560	154290085	526	*	0.595375562	0.001328994	0.028090298	Distal Intergenic	3	154055461	154147504	92044	2	344758	uc003faa.3	-142056	ENSG00000174948	GPR149	G protein-coupled receptor 149
chr15	76679295	76679775	481	*	0.595364543	0.000440909	0.015634894	Intron (uc010bkr.3/49855, intron 11 of 14)	15	76640538	76646992	6455	2	49855	uc031qsw.1	-32303	ENSG00000140386	SCAPER	S-phase cyclin A associated protein in the ER
chr1	221539893	221540376	484	*	0.595021173	0.001771921	0.032743478	Distal Intergenic	1	221503270	221509638	6369	2	400804	uc001hmw.1	-30255	ENSG00000234754	LINC02817	long intergenic non-protein coding RNA 2817
chr20	48256700	48257304	605	*	0.594990636	5.07E-07	0.000471798	Exon (uc002xuu.4/9334, exon 6 of 9)	20	48120411	48184707	64297	2	5740	uc010zyi.2	-71993	ENSG00000124212	PTGIS	prostaglandin I2 synthase
chr8	27625028	27625508	481	*	0.594671581	2.64E-05	0.003645743	Intron (uc003xgc.3/55246, intron 1 of 8)	8	27590833	27630170	39338	2	55246	uc003xgc.3	4662	ENSG00000147419	CCDC25	coiled-coil domain containing 25
chr6	88248881	88249657	777	*	0.594623841	5.16E-05	0.005253221	Intron (uc003pmc.3/57038, intron 7 of 18)	6	88224096	88299685	75590	2	57038	uc003pmc.3	50028	ENSG00000146282	RARS2	arginyl-tRNA synthetase 2, mitochondrial
chr11	59616022	59616721	700	*	0.594341371	0.000699588	0.019960423	Distal Intergenic	11	59609940	59612974	3035	2	2694	uc010rkz.1	-3048	ENSG00000134812	CBLIF	cobalamin binding intrinsic factor
chr4	6060022	6060518	497	*	0.594312446	0.001733851	0.032306491	Intron (uc010idb.1/152789, intron 11 of 20)	4	5925002	5925055	54	2	100616201	uc021xky.1	-134967	ENSG00000263631	MIR378D1	microRNA 378d-1
chr4	4913947	4914455	509	*	0.594219134	4.07E-05	0.004602705	Distal Intergenic	4	4861392	4865660	4269	1	4487	uc003gif.3	52555	ENSG00000163132	MSX1	msh homeobox 1
chr8	74238462	74239399	938	*	0.593912249	1.82E-05	0.002973995	Intron (uc003xzk.2/uc003xzk.2, intron 3 of 5)	8	74209339	74237520	28182	1	157506	uc003xzj.3	29123	ENSG00000121039	RDH10	retinol dehydrogenase 10
chr2	99465511	99466027	517	*	0.593762573	0.000538045	0.017471941	Intron (uc002szf.1/343990, intron 1 of 9)	2	99410309	99552684	142376	2	343990	uc002szf.1	86657	ENSG00000196872	KIAA1211L	KIAA1211 like
chr16	59062765	59063611	847	*	0.593625748	0.000163365	0.009337098	Intron (uc031qwk.1/uc031qwk.1, intron 2 of 3)	16	58741035	58768246	27212	2	2806	uc010vim.1	-294519	ENSG00000125166	GOT2	glutamic-oxaloacetic transaminase 2
chr2	180914599	180915209	611	*	0.593540464	0.000221453	0.010817046	Distal Intergenic	2	180809604	180871840	62237	2	57703	uc002unp.2	-42759	ENSG00000163510	CWC22	CWC22 spliceosome associated protein homolog
chr1	205065469	205065909	441	*	0.593490405	0.001518954	0.029932685	Exon (uc010prd.2/5929, exon 11 of 13)	1	205052257	205053588	1332	2	388730	uc001hbt.3	-11881	ENSG00000174529	TMEM81	transmembrane protein 81
chr13	103441041	103441446	406	*	0.593345886	0.000593416	0.01821919	Exon (uc001vpq.4/79070, exon 7 of 10)	13	103451399	103493888	42490	1	54841	uc001vps.3	-9953	ENSG00000134897	BIVM	basic, immunoglobulin-like variable motif containing
chr14	94810035	94810926	892	*	0.593269865	0.000234732	0.011102488	Distal Intergenic	14	94770585	94789688	19104	2	866	uc010auv.3	-20347	ENSG00000170099	SERPINA6	serpin family A member 6
chr15	51605890	51606529	640	*	0.593208582	0.000153779	0.009075952	Intron (uc001zyz.4/1588, intron 2 of 10)	15	51534965	51610689	75725	2	1588	uc001zze.2	4160	ENSG00000137869	CYP19A1	cytochrome P450 family 19 subfamily A member 1
chr19	16013179	16014163	985	*	0.592181113	0.000127361	0.008369307	Distal Intergenic	19	15996734	16008884	12151	2	8529	uc010xou.1	-4295	ENSG00000186115	CYP4F2	cytochrome P450 family 4 subfamily F member 2
chr3	101472388	101473049	662	*	0.591712209	4.71E-05	0.004983578	Intron (uc010hpm.1/79598, intron 5 of 7)	3	101450207	101486181	35975	1	79598	uc003dvm.1	22181	ENSG00000182504	CEP97	centrosomal protein 97
chr2	237777354	237777874	521	*	0.591595879	3.31E-05	0.004097383	Distal Intergenic	2	237994084	238004527	10444	1	10920	uc010fys.1	-216210	ENSG00000198612	COPS8	COP9 signalosome subunit 8
chr11	115581571	115582327	757	*	0.591585123	5.12E-05	0.005229381	Distal Intergenic	11	115628169	115630915	2747	2	283143	uc009yza.3	48588	NA	LINC00900	long intergenic non-protein coding RNA 900
chr8	11447964	11448450	487	*	0.59155309	0.000117134	0.007973656	Distal Intergenic	8	11434044	11438850	4807	1	83655	uc022arx.1	13920	ENSG00000170983	LINC00208	long intergenic non-protein coding RNA 208
chr11	33568477	33568977	501	*	0.591509395	0.00954129	0.084529237	Intron (uc001mun.1/25758, intron 2 of 10)	11	33563877	33695646	131770	1	25758	uc021qfs.1	4600	ENSG00000110427	KIAA1549L	KIAA1549 like
chr15	67107838	67108224	387	*	0.591335643	0.00049037	0.016638786	Distal Intergenic	15	67000930	67074337	73408	1	4091	uc002aqg.3	106908	ENSG00000137834	SMAD6	SMAD family member 6
chr4	4426832	4427217	386	*	0.591093746	0.000253183	0.011540083	Exon (uc003gic.3/53407, exon 8 of 11)	4	4387584	4420785	33202	1	27065	uc003gia.3	39248	ENSG00000168824	NSG1	neuronal vesicle trafficking associated 1
chr12	56825112	56825543	432	*	0.591065975	5.02E-06	0.001529429	Exon (uc001slf.2/8914, exon 8 of 29)	12	56810157	56843200	33044	2	8914	uc001slf.2	17657	ENSG00000111602	TIMELESS	timeless circadian regulator
chr10	80375991	80376665	675	*	0.591060421	7.68E-05	0.006446282	Distal Intergenic	10	80027085	80159502	132418	1	414243	uc001jzw.2	348906	ENSG00000230417	LINC00595	long intergenic non-protein coding RNA 595
chr8	117325878	117326816	939	*	0.59067038	1.39E-05	0.002550532	Intron (uc031tcc.1/100859921, intron 1 of 13)	8	116962736	117337297	374562	2	100859921	uc031tcc.1	10481	ENSG00000249917	LINC00536	long intergenic non-protein coding RNA 536
chr16	58436718	58437310	593	*	0.590603371	9.52E-05	0.007138835	Exon (uc002enh.4/64785, exon 2 of 3)	16	58426298	58440048	13751	1	64785	uc010cdj.3	10420	ENSG00000181938	GINS3	GINS complex subunit 3
chr9	37360267	37360678	412	*	0.589770403	8.85E-05	0.006867444	Distal Intergenic	9	37422681	37429051	6371	1	9380	uc010mlu.4	-62003	ENSG00000137106	GRHPR	glyoxylate and hydroxypyruvate reductase
chr7	41386578	41387023	446	*	0.589750957	0.000175204	0.009647256	Distal Intergenic	7	41733514	41752792	19279	1	285954	uc003ths.2	-346491	ENSG00000224116	INHBA-AS1	INHBA antisense RNA 1
chr2	99309778	99310570	793	*	0.589744476	3.88E-06	0.00133217	Intron (uc002sze.3/11320, intron 2 of 15)	2	99272325	99279936	7612	2	11320	uc010fim.1	-29842	ENSG00000071073	MGAT4A	alpha-1,3-mannosyl-glycoprotein 4-beta-N-acetylglucosaminyltransferase A
chr17	61058959	61059532	574	*	0.589661999	0.000503225	0.01686535	Distal Intergenic	17	61086898	61505067	418170	1	26115	uc002jal.4	-27366	ENSG00000170921	TANC2	tetratricopeptide repeat, ankyrin repeat and coiled-coil containing 2
chr13	102351286	102352248	963	*	0.589650887	0.001044056	0.024728504	Intron (uc001vpb.4/9358, intron 8 of 10)	13	102142303	102368796	226494	1	9358	uc031qnc.1	208983	ENSG00000198542	ITGBL1	integrin subunit beta like 1
chr7	101223768	101224446	679	*	0.589598115	0.000576659	0.018045515	Distal Intergenic	7	101256605	101272576	15972	2	93408	uc003uyr.3	48130	ENSG00000106436	MYL10	myosin light chain 10
chr6	127544886	127545497	612	*	0.589438638	0.00391681	0.051419968	Distal Intergenic	6	127587827	127609705	21879	1	81847	uc021zes.1	-42330	ENSG00000118518	RNF146	ring finger protein 146
chr17	71020407	71020821	415	*	0.589317821	0.000378003	0.014420441	Intron (uc002jja.3/201266, intron 4 of 9)	17	70642085	71088853	446769	2	201266	uc002jja.3	68032	ENSG00000133195	SLC39A11	solute carrier family 39 member 11
chr10	94681751	94682163	413	*	0.589276155	0.000644354	0.019038598	Intron (uc010qnr.2/54536, intron 9 of 22)	10	94688096	94819251	131156	1	54536	uc001kih.3	-5933	ENSG00000138190	EXOC6	exocyst complex component 6
chr13	78231477	78232460	984	*	0.589193425	0.000265128	0.011877374	Distal Intergenic	13	78271989	78338377	66389	1	122060	uc001vkk.3	-39529	ENSG00000139737	SLAIN1	SLAIN motif family member 1
chr19	30408356	30408797	442	*	0.589170599	7.99E-05	0.00656903	Distal Intergenic	19	30414551	30507519	92969	1	8725	uc002nsq.3	-5754	ENSG00000105176	URI1	URI1 prefoldin like chaperone
chr1	114243957	114244390	434	*	0.589065542	0.000362678	0.01401792	Intron (uc001edm.2/10745, intron 8 of 11)	1	114248389	114256060	7672	2	10745	uc001edo.1	11670	ENSG00000116793	PHTF1	putative homeodomain transcription factor 1
chr6	135358115	135358514	400	*	0.588976713	0.001001564	0.024234597	Exon (uc003qfa.2/10767, exon 5 of 5)	6	135281517	135348292	66776	2	10767	uc003qey.2	-9823	ENSG00000112339	HBS1L	HBS1 like translational GTPase
chr12	92342875	92343425	551	*	0.588678473	0.000539719	0.017471941	Distal Intergenic	12	92378752	92535489	156738	2	256021	uc031qiz.1	192064	ENSG00000257242	LINC01619	long intergenic non-protein coding RNA 1619
chr3	3814574	3815169	596	*	0.58852908	8.18E-06	0.001944235	Distal Intergenic	3	3841121	3889387	48267	1	57633	uc003bpt.4	-25952	ENSG00000175928	LRRN1	leucine rich repeat neuronal 1
chr4	41015266	41015861	596	*	0.588329971	0.00013977	0.008667885	Promoter (<=1kb)	4	40892326	41016415	124090	2	323	uc011byt.1	554	ENSG00000163697	APBB2	amyloid beta precursor protein binding family B member 2
chr15	86526368	86527085	718	*	0.587999407	0.001205097	0.02675089	Distal Intergenic	15	86685242	87572283	887042	1	123624	uc002blz.1	-158157	ENSG00000273540	AGBL1	ATP/GTP binding protein like 1
chr3	15132810	15133443	634	*	0.587929507	4.75E-05	0.00500811	Intron (uc003bzm.1/64145, intron 4 of 13)	3	15111580	15140655	29076	2	64145	uc003bzm.1	7212	ENSG00000131381	RBSN	rabenosyn, RAB effector
chr11	107675921	107676819	899	*	0.587866427	2.61E-06	0.001096326	3' UTR	11	107661717	107729680	67964	2	54733	uc010rvu.2	52861	ENSG00000110660	SLC35F2	solute carrier family 35 member F2
chr11	108690034	108690908	875	*	0.587812074	2.33E-05	0.003410619	Intron (uc001pkl.1/1662, intron 13 of 16)	11	108535816	108811648	275833	1	1662	uc001pkm.3	154218	ENSG00000178105	DDX10	DEAD-box helicase 10
chr4	85795794	85796115	322	*	0.587791275	9.41E-05	0.007091015	Intron (uc003hpd.3/23001, intron 3 of 67)	4	85730019	85818163	88145	2	23001	uc003hpf.3	22048	ENSG00000163625	WDFY3	WD repeat and FYVE domain containing 3
chr6	16035707	16036460	754	*	0.587698091	2.11E-05	0.003234023	Distal Intergenic	6	16129317	16148478	19162	1	29116	uc003nbq.3	-92857	ENSG00000007944	MYLIP	myosin regulatory light chain interacting protein
chr18	62083098	62083702	605	*	0.587694011	5.57E-05	0.005494414	Exon (uc002ljx.3/284294, exon 8 of 10)	18	61880318	61927290	46973	2	400654	uc002ljy.3	-155808	ENSG00000266952	LINC01538	long intergenic non-protein coding RNA 1538
chr18	28787202	28787801	600	*	0.587647961	0.000284011	0.012352172	Distal Intergenic	18	28709214	28742819	33606	2	1823	uc002kwn.3	-44383	ENSG00000134765	DSC1	desmocollin 1
chr18	10116168	10116734	567	*	0.587562795	0.0002688	0.01197342	Distal Intergenic	18	9913955	9960018	46064	1	9218	uc002kok.3	202213	ENSG00000101558	VAPA	VAMP associated protein A
chr4	109773302	109774276	975	*	0.587536563	0.000143981	0.008834513	Exon (uc003hzd.4/84570, exon 21 of 36)	4	109663202	109684235	21034	2	64850	uc011cfo.2	-89067	ENSG00000164089	ETNPPL	ethanolamine-phosphate phospho-lyase
chr1	63931761	63932343	583	*	0.587449781	7.86E-06	0.00191388	Intron (uc001dba.2/23421, intron 4 of 8)	1	63876817	63904233	27417	1	29929	uc010oox.2	54944	ENSG00000088035	ALG6	ALG6 alpha-1,3-glucosyltransferase
chr8	19748551	19749379	829	*	0.58739336	4.33E-05	0.004740601	Distal Intergenic	8	19796582	19824770	28189	1	4023	uc003wzk.4	-47203	ENSG00000175445	LPL	lipoprotein lipase
chr10	5361828	5362264	437	*	0.587387914	0.000290973	0.01255106	Distal Intergenic	10	5406976	5416169	9194	1	114131	uc001ihx.1	-44712	ENSG00000178473	UCN3	urocortin 3
chr1	92007776	92008433	658	*	0.587290756	0.000718317	0.020265835	Distal Intergenic	1	91980376	91991321	10946	1	8317	uc009wdd.3	27400	ENSG00000097046	CDC7	cell division cycle 7
chr1	88995253	88996103	851	*	0.587248244	3.23E-05	0.004070984	Distal Intergenic	1	89149922	89301938	152017	1	5586	uc001dmn.3	-153819	ENSG00000065243	PKN2	protein kinase N2
chr10	123817247	123817982	736	*	0.586932803	8.42E-05	0.006708907	Intron (uc001lfv.3/10579, intron 3 of 22)	10	123872554	124014057	141504	1	10579	uc001lfx.3	-54572	ENSG00000138162	TACC2	transforming acidic coiled-coil containing protein 2
chr9	110850094	110850563	470	*	0.586810168	0.000114903	0.007896076	Distal Intergenic	9	110247133	110252047	4915	2	9314	uc031tes.1	-598047	ENSG00000136826	KLF4	Kruppel like factor 4
chr11	104567036	104567503	468	*	0.586482868	0.000530566	0.017379534	Distal Intergenic	11	104756445	104769397	12953	2	100506742	uc031qdo.1	201894	ENSG00000204403	CASP12	caspase 12 (gene/pseudogene)
chr3	67662894	67663434	541	*	0.586343803	0.000190791	0.009989294	Intron (uc021xae.1/8801, intron 1 of 10)	3	67410884	67705038	294155	2	8801	uc021xae.1	41604	ENSG00000172340	SUCLG2	succinate-CoA ligase GDP-forming beta subunit
chr12	111678746	111679181	436	*	0.586300936	0.000231926	0.011041957	Intron (uc001tsa.2/23316, intron 3 of 21)	12	111798455	111801516	3062	2	144717	uc001tsc.3	122335	ENSG00000198324	PHETA1	PH domain containing endocytic trafficking adaptor 1
chr4	70686355	70686850	496	*	0.585795128	0.001507613	0.029800749	Distal Intergenic	4	70706930	70725870	18941	2	6783	uc003heo.3	39020	ENSG00000109193	SULT1E1	sulfotransferase family 1E member 1
chr6	49743616	49744137	522	*	0.585787275	0.000645307	0.019048802	Distal Intergenic	6	49753364	49755053	1690	2	5232	uc003ozu.3	10916	ENSG00000170950	PGK2	phosphoglycerate kinase 2
chr6	45266662	45267210	549	*	0.585771495	0.000111949	0.007784045	Intron (uc003oxn.2/8464, intron 2 of 11)	6	45296054	45518819	222766	1	860	uc011dvx.2	-28844	ENSG00000124813	RUNX2	RUNX family transcription factor 2
chr11	121499075	121499852	778	*	0.585750985	4.78E-06	0.001506686	Intron (uc001pxx.3/6653, intron 47 of 47)	11	121461128	121504471	43344	1	6653	uc010rzq.1	37947	ENSG00000137642	SORL1	sortilin related receptor 1
chr18	77412319	77412957	639	*	0.585537383	7.09E-05	0.006220361	Distal Intergenic	18	77439801	77514510	74710	1	9150	uc002lnh.2	-26844	ENSG00000060069	CTDP1	CTD phosphatase subunit 1
chr1	11242698	11243076	379	*	0.585534252	0.001159088	0.02622854	Intron (uc001asd.3/2475, intron 28 of 57)	1	11249346	11256038	6693	1	10218	uc001ase.4	-6270	ENSG00000171819	ANGPTL7	angiopoietin like 7
chr20	46872186	46872660	475	*	0.58546192	0.002247851	0.037594861	Distal Intergenic	20	46988654	46999381	10728	1	284749	uc002xtt.2	-115994	ENSG00000235621	LINC00494	long intergenic non-protein coding RNA 494
chr2	3067404	3068121	718	*	0.585326449	0.000839646	0.022058467	Intron (uc002qxh.1/uc002qxh.1, intron 3 of 6)	2	3192741	3323445	130705	2	7260	uc002qxi.2	255324	ENSG00000032389	EIPR1	EARP complex and GARP complex interacting protein 1
chr2	30408258	30408991	734	*	0.585116286	7.27E-06	0.001872097	Distal Intergenic	2	30370382	30383399	13018	1	51646	uc002rnd.3	37876	ENSG00000119801	YPEL5	yippee like 5
chr6	17513742	17514405	664	*	0.58504729	0.00085125	0.022177533	Exon (uc010jpk.1/10486, exon 6 of 12)	6	17600518	17611950	11433	1	51439	uc003ncc.3	-86113	ENSG00000137414	FAM8A1	family with sequence similarity 8 member A1
chr5	115337674	115338371	698	*	0.584788424	0.000332003	0.013387862	Intron (uc003kro.3/206338, intron 10 of 19)	5	115331074	115363299	32226	1	206338	uc003krs.3	6600	ENSG00000172901	LVRN	laeverin
chr1	39061197	39061870	674	*	0.584774333	3.60E-05	0.004290085	Distal Intergenic	1	39303869	39325495	21627	2	64121	uc001ccq.3	263625	ENSG00000116954	RRAGC	Ras related GTP binding C
chr1	151668804	151669608	805	*	0.584732892	0.001715352	0.032130552	3' UTR	1	151672534	151680411	7878	2	11189	uc010pdh.2	10803	ENSG00000159409	CELF3	CUGBP Elav-like family member 3
chr11	121362774	121363216	443	*	0.584522307	0.000380873	0.014453982	Intron (uc001pxx.3/6653, intron 5 of 47)	11	121322912	121504471	181560	1	6653	uc001pxx.3	39862	ENSG00000137642	SORL1	sortilin related receptor 1
chr17	33428128	33428863	736	*	0.584497612	0.000189982	0.009957066	Exon (uc002hiq.2/100529207, exon 5 of 7)	17	33426811	33433500	6690	2	5892	uc010ctj.2	4637	ENSG00000185379	RAD51D	RAD51 paralog D
chr12	14679567	14680088	522	*	0.584462667	0.000510488	0.017007196	Intron (uc001rcc.1/79887, intron 6 of 10)	12	14656597	14720791	64195	2	79887	uc001rcc.1	40703	ENSG00000121316	PLBD1	phospholipase B domain containing 1
chr5	145409386	145409897	512	*	0.584216643	0.000313999	0.012979314	Intron (uc003lnt.3/153769, intron 5 of 9)	5	145429633	145439787	10155	1	153769	uc011dbm.1	-19736	ENSG00000156463	SH3RF2	SH3 domain containing ring finger 2
chr16	55318592	55319107	516	*	0.583740409	0.000153721	0.009075952	Distal Intergenic	16	55358471	55364664	6194	1	79190	uc002ehx.3	-39364	ENSG00000159387	IRX6	iroquois homeobox 6
chr6	46758738	46759093	356	*	0.583723746	0.003879773	0.05109535	Promoter (2-3kb)	6	46761094	46807519	46426	1	4224	uc010jzh.1	-2001	ENSG00000112818	MEP1A	meprin A subunit alpha
chr8	104350183	104350872	690	*	0.583587403	7.12E-05	0.006229587	Distal Intergenic	8	104383743	104388664	4922	1	115908	uc011lhq.2	-32871	ENSG00000164932	CTHRC1	collagen triple helix repeat containing 1
chr1	85518969	85519570	602	*	0.583500235	0.000283261	0.012337198	Distal Intergenic	1	85490241	85514223	23983	2	55283	uc001dks.4	-4746	ENSG00000055732	MCOLN3	mucolipin 3
chr10	31959563	31959930	368	*	0.583481126	0.00025185	0.01152204	Distal Intergenic	10	32094326	32097479	3154	2	94134	uc001ivw.2	137549	ENSG00000165322	ARHGAP12	Rho GTPase activating protein 12
chr1	40174966	40175624	659	*	0.583229765	2.93E-06	0.001155572	Distal Intergenic	1	40144645	40157089	12445	2	51440	uc010oix.2	-17877	ENSG00000116983	HPCAL4	hippocalcin like 4
chr1	28820877	28821438	562	*	0.582970506	0.000120393	0.008095227	Intron (uc001bpv.1/65979, intron 16 of 16)	1	28832455	28865708	33254	1	1104	uc001bqa.2	-11017	ENSG00000180198	RCC1	regulator of chromosome condensation 1
chr22	30055766	30056356	591	*	0.582883775	1.12E-05	0.002280995	Intron (uc003afy.4/4771, intron 7 of 15)	22	30060979	30079904	18926	1	4771	uc010gvp.3	-4623	ENSG00000186575	NF2	neurofibromin 2
chr7	3735274	3736013	740	*	0.582880933	0.00201107	0.035305797	Intron (uc003smx.3/221935, intron 4 of 44)	7	4050598	4308631	258034	1	221935	uc010kso.3	-314585	ENSG00000146555	SDK1	sidekick cell adhesion molecule 1
chr20	31528552	31529153	602	*	0.582824005	0.000530764	0.017379972	Distal Intergenic	20	31571581	31592239	20659	2	140732	uc002wyi.3	63086	ENSG00000167098	SUN5	Sad1 and UNC84 domain containing 5
chr1	158411037	158411610	574	*	0.582815572	0.000379776	0.014448292	Distal Intergenic	1	158389718	158390656	939	2	391107	uc010pii.2	-20381	ENSG00000180708	OR10K2	olfactory receptor family 10 subfamily K member 2
chr6	151835025	151835993	969	*	0.582695224	3.54E-05	0.004253112	Intron (uc003qol.3/80129, intron 1 of 10)	6	151815175	151942328	127154	1	80129	uc003qol.3	19850	ENSG00000120262	CCDC170	coiled-coil domain containing 170
chr15	86604666	86605609	944	*	0.582412749	0.000990079	0.024094562	Distal Intergenic	15	86685242	87572283	887042	1	123624	uc002blz.1	-79633	ENSG00000273540	AGBL1	ATP/GTP binding protein like 1
chr10	131556959	131557802	844	*	0.582375206	3.40E-06	0.001254319	Exon (uc001lkh.2/4255, exon 4 of 5)	10	131641563	131641638	76	2	100422873	uc021qaw.1	83836	ENSG00000266676	MIR4297	microRNA 4297
chr5	14573079	14573706	628	*	0.582280309	0.000115797	0.007911257	Distal Intergenic	5	14581891	14616287	34397	1	54491	uc003jfj.3	-8185	ENSG00000145569	OTULINL	OTU deubiquitinase with linear linkage specificity like
chr3	12500603	12501422	820	*	0.582194695	4.92E-06	0.001522234	Distal Intergenic	3	12525931	12574820	48890	1	80746	uc003bwz.3	-24509	ENSG00000154743	TSEN2	tRNA splicing endonuclease subunit 2
chr5	180328456	180329287	832	*	0.582158849	3.68E-05	0.004336724	Promoter (2-3kb)	5	180326077	180377906	51830	1	79908	uc011dhg.2	2379	ENSG00000113303	BTNL8	butyrophilin like 8
chr22	24992462	24992941	480	*	0.582085282	5.17E-05	0.00525425	Intron (uc003aan.1/2678, intron 1 of 15)	22	24981591	24989035	7445	2	388886	uc003aaq.2	-3427	ENSG00000178026	LRRC75B	leucine rich repeat containing 75B
chr5	93502661	93503127	467	*	0.582066614	0.000467121	0.016180173	Intron (uc003kkn.3/285600, intron 4 of 4)	5	93217017	93447404	230388	2	83989	uc003kkm.4	-55257	ENSG00000113391	FAM172A	family with sequence similarity 172 member A
chr4	27030572	27031271	700	*	0.581997962	0.000784421	0.021164616	Distal Intergenic	4	27004549	27027003	22455	1	57620	uc010iey.3	26023	ENSG00000109689	STIM2	stromal interaction molecule 2
chr17	36540613	36541422	810	*	0.581906548	1.44E-05	0.002591651	Intron (uc002hqa.3/30837, intron 7 of 9)	17	36508007	36561846	53840	1	30837	uc010cvl.3	32606	ENSG00000274211	SOCS7	suppressor of cytokine signaling 7
chr15	88260316	88260982	667	*	0.581902186	0.000888775	0.022758107	Distal Intergenic	15	88120160	88122917	2758	1	145978	uc002bmc.1	140156	ENSG00000259527	LINC00052	long intergenic non-protein coding RNA 52
chr14	85929651	85930240	590	*	0.581886214	0.000302016	0.012761979	Distal Intergenic	14	85996488	86094270	97783	1	23768	uc001xvr.3	-66248	ENSG00000185070	FLRT2	fibronectin leucine rich transmembrane protein 2
chr15	58615097	58615624	528	*	0.58186307	8.40E-05	0.006699562	Distal Intergenic	15	58245622	58571462	325841	2	8854	uc010ugw.2	-43635	ENSG00000128918	ALDH1A2	aldehyde dehydrogenase 1 family member A2
chr2	108343308	108343729	422	*	0.581816103	0.005218945	0.059980347	Distal Intergenic	2	108439520	108442582	3063	2	729121	uc010ywj.1	98853	ENSG00000230651	RGPD4-AS1	RGPD4 antisense RNA 1 (head to head)
chr1	76685343	76685801	459	*	0.581759644	0.000265089	0.011877374	Intron (uc001dhg.4/256435, intron 1 of 3)	1	76540389	77096669	556281	1	256435	uc010orh.1	144954	ENSG00000184005	ST6GALNAC3	ST6 N-acetylgalactosaminide alpha-2,6-sialyltransferase 3
chr7	15894303	15895109	807	*	0.581720057	5.31E-06	0.001572139	Distal Intergenic	7	15650837	15726308	75472	2	4223	uc003stc.3	-167995	ENSG00000106511	MEOX2	mesenchyme homeobox 2
chr3	12246716	12247135	420	*	0.581646674	0.000514677	0.017067053	Distal Intergenic	3	12194568	12200851	6284	2	7079	uc003bwo.3	-45865	ENSG00000157150	TIMP4	TIMP metallopeptidase inhibitor 4
chr10	6298323	6298856	534	*	0.581566875	5.50E-05	0.005450236	Distal Intergenic	10	6319650	6377937	58288	1	399715	uc021pms.1	-20794	ENSG00000215244	LINC02649	long intergenic non-protein coding RNA 2649
chr3	11431246	11431735	490	*	0.581509991	5.10E-05	0.005229381	Intron (uc003bwc.3/10533, intron 17 of 18)	3	11314010	11599139	285130	1	10533	uc011aum.2	117236	ENSG00000197548	ATG7	autophagy related 7
chr1	89303465	89303995	531	*	0.581448155	6.89E-05	0.006106638	Distal Intergenic	1	89318321	89357301	38981	2	2959	uc001dmo.4	53306	ENSG00000137947	GTF2B	general transcription factor IIB
chr15	35791908	35792287	380	*	0.581394058	0.000228444	0.010937063	Intron (uc001zja.3/89978, intron 3 of 8)	15	35838396	36151202	312807	1	100507466	uc001zjc.3	-46109	NA	DPH6-DT	DPH6 divergent transcript
chr4	26038504	26039038	535	*	0.581315992	0.000629386	0.018791083	Distal Intergenic	4	25915814	25931501	15688	1	389203	uc003grw.4	122690	ENSG00000250317	SMIM20	small integral membrane protein 20
chr19	42983874	42984342	469	*	0.5810879	0.000103609	0.007459541	Intron (uc010eif.2/100996307, intron 1 of 2)	19	42932695	42947136	14442	2	284340	uc002otu.3	-36738	ENSG00000189377	CXCL17	C-X-C motif chemokine ligand 17
chr9	81927458	81928114	657	*	0.580836527	0.001597068	0.030889668	Distal Intergenic	9	82186878	82341656	154779	1	7091	uc004alc.3	-258764	ENSG00000106829	TLE4	TLE family member 4, transcriptional corepressor
chr10	50681087	50681833	747	*	0.58083113	2.00E-05	0.003121036	Promoter (2-3kb)	10	50662526	50684356	21831	2	2074	uc009xod.4	2523	ENSG00000225830	ERCC6	ERCC excision repair 6, chromatin remodeling factor
chr1	147747174	147747728	555	*	0.580830231	0.000122251	0.008167839	Intron (uc001eqe.3/728841, intron 12 of 13)	1	147806603	147806678	76	2	100847044	uc031pom.1	58950	ENSG00000283676	MIR5087	microRNA 5087
chr19	6016113	6016602	490	*	0.580690456	5.19E-05	0.005269986	Exon (uc002meb.3/5990, exon 7 of 18)	19	5978414	6020374	41961	1	100128568	uc031rjb.1	37699	ENSG00000266983	LOC100128568	uncharacterized LOC100128568
chr5	79904735	79905348	614	*	0.580594518	0.001714979	0.032130552	Distal Intergenic	5	79852574	79866304	13731	2	340120	uc010jan.3	-38431	ENSG00000189127	ANKRD34B	ankyrin repeat domain 34B
chr5	59265449	59265980	532	*	0.58055488	0.006260834	0.06653212	Intron (uc003jsb.3/5144, intron 3 of 16)	5	58264866	59189621	924756	2	5144	uc003jsa.2	-75828	ENSG00000113448	PDE4D	phosphodiesterase 4D
chr5	107352915	107353479	565	*	0.580542659	1.13E-05	0.002289339	Intron (uc011cvc.2/64839, intron 7 of 8)	5	106762677	107006596	243920	2	1946	uc010jbr.1	-346319	ENSG00000184349	EFNA5	ephrin A5
chr18	11168090	11168765	676	*	0.580464902	0.000775918	0.021012436	Distal Intergenic	18	10670244	11148761	478518	2	63895	uc002kos.2	-19329	ENSG00000154864	PIEZO2	piezo type mechanosensitive ion channel component 2
chr10	27423345	27423862	518	*	0.579927709	8.14E-05	0.006633214	Exon (uc001iti.3/10730, exon 7 of 20)	10	27399040	27443349	44310	2	10730	uc001iti.3	19487	ENSG00000136758	YME1L1	YME1 like 1 ATPase
chr6	17775895	17776419	525	*	0.579529515	1.84E-05	0.002985163	Intron (uc003nce.2/63971, intron 2 of 6)	6	17759414	17779475	20062	2	63971	uc003nce.2	3056	ENSG00000137177	KIF13A	kinesin family member 13A
chr1	235281390	235281772	383	*	0.57909986	3.59E-05	0.00428928	Intron (uc001hwl.3/9804, intron 3 of 4)	1	235291118	235291252	135	2	677802	uc001hwm.1	9480	ENSG00000207181	SNORA14B	small nucleolar RNA, H/ACA box 14B
chr5	129660685	129661502	818	*	0.579084185	0.000171885	0.009568313	Distal Intergenic	5	129240523	129522327	281805	1	337876	uc003kvd.3	420162	ENSG00000198108	CHSY3	chondroitin sulfate synthase 3
chr4	85841886	85842443	558	*	0.578994937	9.02E-06	0.002046882	Intron (uc003hpd.3/23001, intron 2 of 67)	4	85730019	85818163	88145	2	23001	uc003hpf.3	-23723	ENSG00000163625	WDFY3	WD repeat and FYVE domain containing 3
chr10	70299228	70299787	560	*	0.578910016	0.000234691	0.011102488	Distal Intergenic	10	70242090	70287280	45191	2	8034	uc010qiy.2	-11948	ENSG00000122912	SLC25A16	solute carrier family 25 member 16
chr11	69424408	69424985	578	*	0.578733505	7.73E-05	0.006468261	Distal Intergenic	11	69455873	69469242	13370	1	595	uc001opa.3	-30888	ENSG00000110092	CCND1	cyclin D1
chr11	3842639	3843113	475	*	0.578681703	1.94E-05	0.003070409	Intron (uc001lyl.4/27315, intron 3 of 7)	11	3829766	3847601	17836	1	27315	uc031pyp.1	12873	ENSG00000148985	PGAP2	post-GPI attachment to proteins 2
chr10	35536462	35537438	977	*	0.578570713	6.86E-07	0.00054205	Promoter (<=1kb)	10	35535953	35860847	324895	1	219771	uc001iyu.4	509	ENSG00000108100	CCNY	cyclin Y
chr4	36101625	36102049	425	*	0.578499381	0.001354255	0.028303428	Intron (uc003gsq.2/116984, intron 27 of 32)	4	35949843	36075457	125615	2	116984	uc003gso.3	-26168	ENSG00000047365	ARAP2	ArfGAP with RhoGAP domain, ankyrin repeat and PH domain 2
chr3	11450537	11451074	538	*	0.578456131	0.001100912	0.025441054	Intron (uc003bwc.3/10533, intron 17 of 18)	3	11314010	11599139	285130	1	10533	uc011aum.2	136527	ENSG00000197548	ATG7	autophagy related 7
chr9	93432697	93433277	581	*	0.578425803	0.007739235	0.075176462	Distal Intergenic	9	93372114	93405108	32995	2	54769	uc004aqx.1	-27589	ENSG00000165023	DIRAS2	DIRAS family GTPase 2
chr3	31012710	31013240	531	*	0.578398375	0.001181154	0.026507799	Distal Intergenic	3	30842348	30936153	93806	2	339896	uc003ceq.1	-76557	ENSG00000144644	GADL1	glutamate decarboxylase like 1
chr5	93880419	93881088	670	*	0.578348188	3.14E-05	0.004020417	Intron (uc011cuk.2/285600, intron 2 of 20)	5	93486556	93954309	467754	2	285600	uc011cuk.2	73221	ENSG00000185261	KIAA0825	KIAA0825
chr8	82479841	82480427	587	*	0.578342129	0.000144054	0.008834513	Distal Intergenic	8	82437281	82443550	6270	2	646486	uc011lfp.2	-36291	ENSG00000197416	FABP12	fatty acid binding protein 12
chr3	150741170	150741609	440	*	0.578139095	0.000293796	0.012588947	Intron (uc011bny.1/116933, intron 1 of 4)	3	150660341	150690786	30446	2	7401	uc021xfw.1	-50384	ENSG00000163646	CLRN1	clarin 1
chr21	30056458	30057450	993	*	0.577630678	0.000396722	0.01476032	Distal Intergenic	21	29911640	29912677	1038	1	118421	uc002ymn.3	144818	ENSG00000226935	LINC00161	long intergenic non-protein coding RNA 161
chr8	132827608	132828436	829	*	0.577576689	0.000438062	0.015569168	Distal Intergenic	8	132916356	133025886	109531	1	23167	uc003yte.3	-87920	ENSG00000132294	EFR3A	EFR3 homolog A
chr1	230824159	230824541	383	*	0.577557691	4.84E-05	0.005054372	Exon (uc001htw.3/22796, exon 15 of 18)	1	230814376	230829731	15356	1	22796	uc031psr.1	9783	ENSG00000135775	COG2	component of oligomeric golgi complex 2
chr9	98908064	98908690	627	*	0.577317908	2.76E-05	0.003741214	Distal Intergenic	9	98868943	98878693	9751	2	158434	uc031teo.1	-29371	ENSG00000275465	LOC158434	uncharacterized LOC158434
chr6	113756685	113757649	965	*	0.577022488	7.92E-05	0.006543543	Distal Intergenic	6	114178527	114184652	6126	1	4082	uc003pvy.4	-420878	ENSG00000277443	MARCKS	myristoylated alanine rich protein kinase C substrate
chr2	86691577	86692196	620	*	0.577021996	9.88E-07	0.000673273	Intron (uc002sri.4/55818, intron 9 of 25)	2	86669141	86719839	50699	1	55818	uc010ytk.2	22436	ENSG00000115548	KDM3A	lysine demethylase 3A
chr10	76564469	76565232	764	*	0.576710848	3.18E-05	0.004030931	Distal Intergenic	10	76586171	76792380	206210	1	23522	uc001jwm.2	-20939	ENSG00000156650	KAT6B	lysine acetyltransferase 6B
chr2	26856942	26857642	701	*	0.576703043	0.000295728	0.012625041	Intron (uc002rhm.3/130106, intron 2 of 6)	2	26804073	26864211	60139	2	130106	uc002rhm.3	6569	ENSG00000157884	CIB4	calcium and integrin binding family member 4
chr4	26260291	26260860	570	*	0.576656125	0.000148382	0.008903638	Distal Intergenic	4	26321332	26436752	115421	1	3516	uc003grx.2	-60472	ENSG00000168214	RBPJ	recombination signal binding protein for immunoglobulin kappa J region
chr22	38273121	38273563	443	*	0.57646988	0.000675671	0.019655253	Intron (uc003auf.3/51386, intron 10 of 12)	22	38245488	38284789	39302	1	51386	uc003aug.3	27633	ENSG00000100129	EIF3L	eukaryotic translation initiation factor 3 subunit L
chr1	244634414	244635015	602	*	0.576369788	8.76E-05	0.006831557	Intron (uc001iak.1/257044, intron 3 of 15)	1	244624673	244803662	178990	1	257044	uc010pyn.2	9741	ENSG00000179397	CATSPERE	catsper channel auxiliary subunit epsilon
chr4	139291192	139291634	443	*	0.576244142	0.001680561	0.031775969	Intron (uc031sha.1/100874047, intron 2 of 2)	4	139230865	139345498	114634	1	100874047	uc031sha.1	60327	ENSG00000251372	LINC00499	long intergenic non-protein coding RNA 499
chr1	229717702	229718320	619	*	0.576067777	3.78E-06	0.001312588	Distal Intergenic	1	229652329	229694442	42114	2	23456	uc001htp.4	-23260	ENSG00000135776	ABCB10	ATP binding cassette subfamily B member 10
chr2	233049121	233049811	691	*	0.576036765	6.52E-05	0.005951153	Intron (uc002vsm.4/129563, intron 9 of 20)	2	232888987	233201687	312701	1	129563	uc002vso.3	160134	ENSG00000144535	DIS3L2	DIS3 like 3'-5' exoribonuclease 2
chr10	8221035	8221645	611	*	0.575958657	0.000852757	0.022198338	Distal Intergenic	10	8096667	8117164	20498	1	2625	uc001ika.3	124368	ENSG00000107485	GATA3	GATA binding protein 3
chr3	59724034	59724549	516	*	0.575505408	0.000176536	0.009689605	Distal Intergenic	3	58873072	59035758	162687	2	200844	uc011bfg.1	-688276	ENSG00000163689	C3orf67	chromosome 3 open reading frame 67
chr2	240333921	240334449	529	*	0.57549451	6.49E-05	0.005936949	Distal Intergenic	2	240016312	240323346	307035	2	9759	uc010fza.2	-10575	ENSG00000068024	HDAC4	histone deacetylase 4
chr3	149984275	149984799	525	*	0.575463816	5.63E-05	0.005520228	Distal Intergenic	3	150126788	150177615	50828	1	9819	uc003exv.3	-141989	ENSG00000196428	TSC22D2	TSC22 domain family member 2
chr18	2155737	2156383	647	*	0.575355911	0.000219171	0.010745162	Distal Intergenic	18	2537524	2555037	17514	2	64863	uc010dkj.3	398654	ENSG00000101574	METTL4	methyltransferase like 4
chr16	1374394	1375093	700	*	0.575313868	6.74E-06	0.00180772	3' UTR	16	1383606	1399442	15837	1	8938	uc002clj.3	-8513	ENSG00000007516	BAIAP3	BAI1 associated protein 3
chr1	232711428	232712068	641	*	0.574819312	0.000136788	0.008584798	Distal Intergenic	1	232533712	232651243	117532	2	57568	uc001hvg.3	-60185	ENSG00000116991	SIPA1L2	signal induced proliferation associated 1 like 2
chr21	47304774	47305207	434	*	0.574684789	9.22E-05	0.00704494	Intron (uc010gqb.3/54039, intron 3 of 13)	21	47316122	47362368	46247	1	54039	uc002zht.2	-10915	ENSG00000183570	PCBP3	poly(rC) binding protein 3
chr3	43661078	43661448	371	*	0.574682061	0.000433516	0.015498462	Promoter (2-3kb)	3	43407818	43663560	255743	2	55129	uc003cmv.3	2112	ENSG00000160746	ANO10	anoctamin 10
chr6	97585155	97586053	899	*	0.574632062	0.000103534	0.007459541	Intron (uc003poz.2/114792, intron 8 of 8)	6	97458076	97588630	130555	1	114792	uc003ppa.2	127079	ENSG00000186231	KLHL32	kelch like family member 32
chr4	22414152	22414585	434	*	0.574480523	0.001482813	0.029579862	Intron (uc010ieo.2/166647, intron 12 of 16)	4	22388997	22396491	7495	2	166647	uc003gql.2	-17661	ENSG00000152990	ADGRA3	adhesion G protein-coupled receptor A3
chr1	177893064	177893614	551	*	0.574390887	2.67E-05	0.003662085	Distal Intergenic	1	177897489	177917779	20291	2	89866	uc009wwy.1	24165	ENSG00000120341	SEC16B	SEC16 homolog B, endoplasmic reticulum export factor
chr3	188190845	188191278	434	*	0.574244017	0.00236539	0.038761329	Intron (uc011bsg.2/4026, intron 2 of 9)	3	188286786	188608460	321675	1	4026	uc011bsj.2	-95508	ENSG00000145012	LPP	LIM domain containing preferred translocation partner in lipoma
chr10	63848951	63849565	615	*	0.574153968	6.16E-05	0.005755254	Intron (uc001jlt.2/84159, intron 9 of 9)	10	63808970	63856707	47738	1	84159	uc001jlu.2	39981	ENSG00000150347	ARID5B	AT-rich interaction domain 5B
chr17	57647785	57648228	444	*	0.574128553	3.52E-05	0.004250339	5' UTR	17	57642991	57654726	11736	1	79665	uc002ixo.1	4794	ENSG00000108406	DHX40	DEAH-box helicase 40
chr15	34367202	34367788	587	*	0.573901209	3.57E-06	0.00127626	Distal Intergenic	15	34376224	34394053	17830	2	56851	uc001zhm.3	26265	ENSG00000134153	EMC7	ER membrane protein complex subunit 7
chr2	228551893	228552273	381	*	0.573894467	0.002550919	0.040428363	3' UTR	2	228549926	228582745	32820	2	80704	uc002vpi.3	30472	ENSG00000135917	SLC19A3	solute carrier family 19 member 3
chr15	56286732	56287398	667	*	0.573874882	1.03E-06	0.000693708	Promoter (<=1kb)	15	56119122	56285835	166714	2	4734	uc002adl.3	-897	ENSG00000069869	NEDD4	NEDD4 E3 ubiquitin protein ligase
chr5	167724704	167725313	610	*	0.573668301	3.23E-05	0.004070984	Intron (uc003lzu.3/23286, intron 1 of 22)	5	167719065	167899308	180244	1	23286	uc011den.2	5639	ENSG00000113645	WWC1	WW and C2 domain containing 1
chr1	14007844	14008421	578	*	0.573516026	0.00204461	0.035673371	Distal Intergenic	1	14026735	14151574	124840	1	7799	uc001avg.3	-18314	ENSG00000116731	PRDM2	PR/SET domain 2
chr16	20693471	20693956	486	*	0.573481684	4.57E-05	0.004894348	Exon (uc002dhm.1/116285, exon 3 of 13)	16	20634559	20702578	68020	2	116285	uc002dhm.1	8622	ENSG00000166743	ACSM1	acyl-CoA synthetase medium chain family member 1
chr13	77347925	77348431	507	*	0.573183852	0.001251845	0.027281653	Distal Intergenic	13	77454304	77460540	6237	2	115207	uc010aeu.1	112109	ENSG00000178695	KCTD12	potassium channel tetramerization domain containing 12
chr2	47094988	47095825	838	*	0.573115616	0.000599044	0.018333214	Distal Intergenic	2	47073015	47086145	13131	1	100134259	uc002rvj.1	21973	ENSG00000239332	LINC01119	long intergenic non-protein coding RNA 1119
chr5	164425595	164426145	551	*	0.57305459	0.00073669	0.020468273	Distal Intergenic	5	162944463	162946359	1897	1	27430	uc003lzm.4	1481132	ENSG00000038274	MAT2B	methionine adenosyltransferase 2B
chr16	69330820	69331625	806	*	0.572887096	2.48E-06	0.001087264	Intron (uc002ewu.3/6645, intron 5 of 6)	16	69345287	69358946	13660	1	27183	uc002eww.3	-13662	ENSG00000132612	VPS4A	vacuolar protein sorting 4 homolog A
chr10	101480994	101481321	328	*	0.57287941	0.001027608	0.02453402	Intron (uc001kqb.4/1355, intron 5 of 8)	10	101491958	101507468	15511	1	51076	uc010qpk.2	-10637	ENSG00000119929	CUTC	cutC copper transporter
chr4	113262744	113263245	502	*	0.572467451	0.000174472	0.009643837	Intron (uc003iam.3/80216, intron 2 of 3)	4	113303554	113363764	60211	1	80216	uc010imo.3	-40309	ENSG00000073331	ALPK1	alpha kinase 1
chr4	166225695	166226072	378	*	0.57216019	0.000298914	0.012678519	Intron (uc003irb.3/11275, intron 8 of 14)	4	166248818	166261791	12974	1	6307	uc010irb.3	-22746	ENSG00000052802	MSMO1	methylsterol monooxygenase 1
chr17	28728420	28728886	467	*	0.572111556	0.000185831	0.009906676	Intron (uc002hfb.2/1362, intron 2 of 20)	17	28707496	28796675	89180	1	1362	uc010wbp.2	20924	ENSG00000108582	CPD	carboxypeptidase D
chr15	76922714	76923164	451	*	0.572097301	0.000313365	0.012979314	Intron (uc010bkr.3/49855, intron 5 of 14)	15	76640527	77021078	380552	2	49855	uc010bkr.3	97914	ENSG00000140386	SCAPER	S-phase cyclin A associated protein in the ER
chr2	181403381	181403794	414	*	0.572081928	0.001239162	0.027164646	Distal Intergenic	2	181845112	181928150	83039	1	10477	uc002unq.1	-441318	ENSG00000170035	UBE2E3	ubiquitin conjugating enzyme E2 E3
chr2	197521529	197522047	519	*	0.5720578	0.0013226	0.028037749	Exon (uc002uto.1/284992, exon 3 of 7)	2	197504356	197597530	93175	1	284992	uc010zgs.1	17173	ENSG00000144395	CCDC150	coiled-coil domain containing 150
chr2	213922798	213923281	484	*	0.571974356	0.000166659	0.009427983	Intron (uc002vej.3/22807, intron 4 of 8)	2	213864411	213879996	15586	2	22807	uc002vei.3	-42802	ENSG00000030419	IKZF2	IKAROS family zinc finger 2
chr5	145578954	145579709	756	*	0.571767856	0.000231619	0.011032926	Distal Intergenic	5	145583163	145649147	65985	1	54439	uc003lny.2	-3454	ENSG00000091009	RBM27	RNA binding motif protein 27
chr21	46038478	46039416	939	*	0.571565436	0.00080157	0.021459681	Intron (uc002zfe.1/54084, intron 1 of 11)	21	46031996	46032871	876	1	386681	uc002zfo.1	6482	ENSG00000187766	KRTAP10-8	keratin associated protein 10-8
chr17	61187937	61188404	468	*	0.571463554	0.001289982	0.027709124	Intron (uc002jal.4/26115, intron 3 of 24)	17	61271352	61505067	233716	1	26115	uc010wpe.2	-82948	ENSG00000170921	TANC2	tetratricopeptide repeat, ankyrin repeat and coiled-coil containing 2
chr5	70805164	70805717	554	*	0.571297342	0.000182556	0.009847211	Exon (uc003kbn.1/55814, exon 17 of 17)	5	70818154	70863649	45496	1	55814	uc003kbq.1	-12437	ENSG00000145734	BDP1	B double prime 1, subunit of RNA polymerase III transcription initiation factor IIIB
chr7	95768346	95768688	343	*	0.571107273	0.001442183	0.02921539	Intron (uc003uof.4/10165, intron 14 of 17)	7	95848974	95849068	95	2	693176	uc022aho.1	80380	ENSG00000208025	MIR591	microRNA 591
chr11	16985087	16985664	578	*	0.571040382	0.000121804	0.008144277	Intron (uc010rcu.1/144100, intron 3 of 26)	11	16800548	17035963	235416	2	144100	uc010rcu.1	50299	ENSG00000166689	PLEKHA7	pleckstrin homology domain containing A7
chr10	82362641	82363583	943	*	0.570952484	9.55E-06	0.002119744	Promoter (<=1kb)	10	82363335	82406316	42982	1	387694	uc001kcm.1	0	ENSG00000178217	SH2D4B	SH2 domain containing 4B
chr7	129672751	129673267	517	*	0.570532491	0.001182926	0.026528285	Intron (uc010lma.3/51530, intron 2 of 6)	7	129658126	129680941	22816	2	51530	uc010lma.3	7674	ENSG00000091732	ZC3HC1	zinc finger C3HC-type containing 1
chr11	6213331	6213780	450	*	0.570339152	0.002802465	0.042531592	Distal Intergenic	11	6220454	6221416	963	1	120787	uc010qzz.2	-6674	ENSG00000175485	OR52W1	olfactory receptor family 52 subfamily W member 1
chr2	144032113	144032604	492	*	0.570275027	6.51E-05	0.005941757	Intron (uc010zbl.1/55843, intron 6 of 7)	2	143886899	144525921	639023	1	55843	uc002tvm.4	145214	ENSG00000075884	ARHGAP15	Rho GTPase activating protein 15
chr21	35763599	35764295	697	*	0.570239842	2.59E-06	0.001096326	Intron (uc002ytv.2/54065, intron 2 of 3)	21	35747749	35775074	27326	1	54065	uc002ytw.2	15850	ENSG00000205670	SMIM11A	small integral membrane protein 11A
chr1	31960750	31961229	480	*	0.570132281	0.000171579	0.00956257	Distal Intergenic	1	31971839	31973124	1286	1	149086	uc001bsw.2	-10610	ENSG00000260386	LDC1P	leucine decarboxylase 1, pseudogene
chr11	4521908	4522363	456	*	0.569926108	0.000220704	0.01078606	Distal Intergenic	11	4510109	4511138	1030	1	390036	uc001lza.2	11799	ENSG00000196778	OR52K1	olfactory receptor family 52 subfamily K member 1
chr14	35371129	35371540	412	*	0.569775126	0.000282461	0.01230804	Distal Intergenic	14	35221937	35344853	122917	2	11177	uc001wsl.3	-26276	ENSG00000198604	BAZ1A	bromodomain adjacent to zinc finger domain 1A
chr5	127529966	127530375	410	*	0.569769871	0.000178674	0.009741282	Distal Intergenic	5	127493680	127506787	13108	1	6558	uc003kut.1	36286	ENSG00000064651	SLC12A2	solute carrier family 12 member 2
chr6	41752597	41753356	760	*	0.569674173	1.55E-05	0.002672173	Promoter (<=1kb)	6	41754178	41757633	3456	1	100188893	uc003org.3	-822	ENSG00000214736	TOMM6	translocase of outer mitochondrial membrane 6
chr1	86992835	86993594	760	*	0.569666871	2.40E-05	0.003481377	Distal Intergenic	1	87012759	87046432	33674	1	22802	uc009wcs.3	-19165	ENSG00000016602	CLCA4	chloride channel accessory 4
chr5	96384740	96385293	554	*	0.569630478	0.000167727	0.00946564	Distal Intergenic	5	96294156	96365115	70960	1	4012	uc003kmw.1	90584	ENSG00000113441	LNPEP	leucyl and cystinyl aminopeptidase
chr2	144316444	144317043	600	*	0.569479994	0.000224516	0.010861405	Intron (uc002tvm.4/55843, intron 11 of 13)	2	144193163	144525921	332759	1	55843	uc002tvn.3	123281	ENSG00000075884	ARHGAP15	Rho GTPase activating protein 15
chr5	175045376	175045975	600	*	0.569295158	0.00015865	0.009230252	Distal Intergenic	5	175085040	175113245	28206	1	3274	uc003mdc.4	-39065	ENSG00000113749	HRH2	histamine receptor H2
chr3	44492666	44493198	533	*	0.569286592	0.000164787	0.00936717	Exon (uc011azv.1/353274, exon 2 of 6)	3	44481262	44497188	15927	2	353274	uc011azv.1	3990	ENSG00000185219	ZNF445	zinc finger protein 445
chr16	87029179	87029595	417	*	0.569047255	6.38E-05	0.005866229	Distal Intergenic	16	87336404	87351026	14623	2	100506581	uc002fju.3	321431	ENSG00000260456	C16orf95	chromosome 16 open reading frame 95
chr8	41920262	41920901	640	*	0.56880292	4.52E-05	0.004865017	Distal Intergenic	8	41799567	41909505	109939	2	7994	uc010lxd.3	-10757	ENSG00000083168	KAT6A	lysine acetyltransferase 6A
chr13	32662858	32663493	636	*	0.568571833	0.001013393	0.024372537	Intron (uc001utx.3/10129, intron 2 of 60)	13	32605437	32870776	265340	1	10129	uc010tdw.3	57421	ENSG00000073910	FRY	FRY microtubule binding protein
chr14	98054283	98054683	401	*	0.568495246	0.001396308	0.02870639	Distal Intergenic	14	98098984	98152995	54012	2	100129345	uc001yfv.2	98312	ENSG00000197176	LINC02291	long intergenic non-protein coding RNA 2291
chr8	6810594	6811249	656	*	0.568480793	7.54E-05	0.006368123	Promoter (1-2kb)	8	6808248	6809121	874	2	449491	uc031szx.1	-1473	ENSG00000223629	DEFA8P	defensin alpha 8, pseudogene
chr12	43699151	43699806	656	*	0.568438841	0.00048702	0.016594503	Distal Intergenic	12	43816622	43833554	16933	2	80070	uc001rno.1	133748	ENSG00000173157	ADAMTS20	ADAM metallopeptidase with thrombospondin type 1 motif 20
chr18	13696977	13697434	458	*	0.568367808	0.001036559	0.024640164	Intron (uc002ksj.4/125228, intron 2 of 4)	18	13663346	13682104	18759	2	125228	uc010dlg.3	-14873	ENSG00000177150	FAM210A	family with sequence similarity 210 member A
chr5	86628846	86629345	500	*	0.568313426	0.000511085	0.017007889	Exon (uc003kiw.3/5921, exon 4 of 25)	5	86564741	86687743	123003	1	5921	uc011ctw.2	64105	ENSG00000145715	RASA1	RAS p21 protein activator 1
chr2	102547283	102548020	738	*	0.568292709	7.43E-05	0.006334286	Distal Intergenic	2	102608306	102641218	32913	1	7850	uc002tbo.2	-60286	ENSG00000115590	IL1R2	interleukin 1 receptor type 2
chr14	99524876	99525332	457	*	0.568265131	0.006586075	0.068386919	Distal Intergenic	14	99635625	99737822	102198	2	64919	uc001yga.3	212490	ENSG00000127152	BCL11B	BAF chromatin remodeling complex subunit BCL11B
chr9	2699778	2700177	400	*	0.568260267	0.001365589	0.028403822	Distal Intergenic	9	2717526	2730037	12512	1	169522	uc003zho.2	-17349	ENSG00000168263	KCNV2	potassium voltage-gated channel modifier subfamily V member 2
chr1	99407422	99407963	542	*	0.56808132	0.001488484	0.029624871	Intron (uc001dsb.3/163404, intron 3 of 5)	1	99469832	99614408	144577	1	100129620	uc001dsd.1	-61869	ENSG00000232825	LOC100129620	uncharacterized LOC100129620
chr12	59805025	59805795	771	*	0.567815205	0.001334211	0.028152965	Distal Intergenic	12	59989821	60183635	193815	1	9194	uc001sqs.4	-184026	ENSG00000118596	SLC16A7	solute carrier family 16 member 7
chr10	119459563	119460179	617	*	0.567745606	0.001296379	0.027781193	Distal Intergenic	10	119243804	119304579	60776	2	196047	uc001ldg.3	-154984	ENSG00000229847	EMX2OS	EMX2 opposite strand/antisense RNA
chr8	126626809	126627273	465	*	0.567741625	0.000152501	0.009051644	Distal Intergenic	8	126445943	126450644	4702	1	10221	uc010mdn.3	180866	ENSG00000173334	TRIB1	tribbles pseudokinase 1
chr4	22690580	22691384	805	*	0.567717245	0.000212745	0.010578422	Distal Intergenic	4	22694537	22821195	126659	1	57733	uc031sdv.1	-3153	ENSG00000249948	GBA3	glucosylceramidase beta 3 (gene/pseudogene)
chr2	28231697	28232017	321	*	0.567686455	8.38E-06	0.001975488	Intron (uc002rlp.2/9577, intron 4 of 11)	2	28219234	28219316	83	1	100422965	uc021vff.1	12463	ENSG00000265321	MIR4263	microRNA 4263
chr4	15608466	15608970	505	*	0.567460731	0.000231115	0.011028447	Intron (uc010idw.2/26234, intron 8 of 8)	4	15606007	15646280	40274	2	26234	uc010idw.2	37310	ENSG00000118564	FBXL5	F-box and leucine rich repeat protein 5
chr3	107514974	107515547	574	*	0.567254913	9.90E-06	0.002160316	Intron (uc003dwk.5/56987, intron 14 of 16)	3	107493566	107530176	36611	1	56987	uc003dwo.5	21408	ENSG00000114439	BBX	BBX high mobility group box domain containing
chr6	142196562	142197243	682	*	0.567119321	0.000534469	0.017468969	Intron (uc003qit.1/uc003qit.1, intron 3 of 4)	6	142396745	142409936	13192	2	4829	uc003qiu.3	212693	ENSG00000135577	NMBR	neuromedin B receptor
chr2	164555099	164555498	400	*	0.567065544	0.005490314	0.061745419	Intron (uc002uck.1/55137, intron 2 of 2)	2	164464118	164592513	128396	2	55137	uc002uck.1	37015	ENSG00000182263	FIGN	fidgetin, microtubule severing factor
chr2	190617348	190617845	498	*	0.567018366	6.31E-06	0.001726507	Exon (uc002uqz.1/64172, exon 6 of 9)	2	190627506	190630282	2777	1	101409258	uc031rql.1	-9661	NA	OSGEPL1-AS1	OSGEPL1 antisense RNA 1
chr13	105872132	105872762	631	*	0.567014144	0.001124028	0.025797792	Distal Intergenic	13	106118216	106143383	25168	1	267012	uc001vpz.3	-245454	ENSG00000182346	DAOA	D-amino acid oxidase activator
chr16	85938986	85939567	582	*	0.566974769	0.000121133	0.008122456	Promoter (2-3kb)	16	85936318	85943486	7169	1	3394	uc002fji.3	2668	ENSG00000140968	IRF8	interferon regulatory factor 8
chr11	107274113	107274981	869	*	0.566787454	3.34E-05	0.004124375	Intron (uc001pjh.4/143884, intron 7 of 15)	11	107197072	107313775	116704	2	143884	uc001pjh.4	38794	ENSG00000152404	CWF19L2	CWF19 like cell cycle control factor 2
chr3	141449176	141450097	922	*	0.566602118	1.49E-05	0.002630831	Distal Intergenic	3	141457051	141465645	8595	1	9616	uc003euc.3	-6954	ENSG00000114125	RNF7	ring finger protein 7
chr14	38559478	38560102	625	*	0.566531465	2.90E-05	0.003853779	Distal Intergenic	14	38677204	38682268	5065	1	6751	uc001wul.1	-117102	ENSG00000139874	SSTR1	somatostatin receptor 1
chr17	68309142	68309974	833	*	0.566450069	7.30E-06	0.00187233	Distal Intergenic	17	68165676	68176183	10508	1	3759	uc002jir.3	143466	ENSG00000123700	KCNJ2	potassium inwardly rectifying channel subfamily J member 2
chr10	123908300	123909205	906	*	0.566408366	3.30E-05	0.004092195	Intron (uc001lfv.3/10579, intron 7 of 22)	10	123923105	124014057	90953	1	10579	uc001lfz.3	-13900	ENSG00000138162	TACC2	transforming acidic coiled-coil containing protein 2
chr5	134492009	134492803	795	*	0.566337694	2.39E-05	0.003476949	Intron (uc003laj.2/100996485, intron 2 of 5)	5	134571924	134583867	11944	2	340073	uc003lak.3	91064	ENSG00000249647	C5orf66-AS2	C5orf66 antisense RNA 2
chr13	78035059	78035598	540	*	0.566311131	0.000133769	0.008508866	Distal Intergenic	13	78109809	78219398	109590	1	8796	uc001vki.3	-74211	ENSG00000136155	SCEL	sciellin
chr3	187849441	187850023	583	*	0.566245419	0.00115055	0.026113468	Distal Intergenic	3	187871663	188608460	736798	1	4026	uc011bsg.2	-21640	ENSG00000145012	LPP	LIM domain containing preferred translocation partner in lipoma
chr7	21973173	21974081	909	*	0.566184521	0.00052156	0.017198309	Intron (uc003sve.4/55536, intron 2 of 10)	7	21940517	21985542	45026	2	55536	uc003sve.4	11461	ENSG00000164649	CDCA7L	cell division cycle associated 7 like
chr5	98321480	98321974	495	*	0.566054144	0.000333309	0.013400237	Distal Intergenic	5	98264838	98266713	1876	1	100289230	uc021ybw.1	56642	NA	LOC100289230	uncharacterized LOC100289230
chr9	86948839	86949376	538	*	0.565700233	0.005969292	0.064667564	Intron (uc010mpz.3/64078, intron 1 of 17)	9	86890765	86955694	64930	2	64078	uc010mpz.3	6318	ENSG00000197506	SLC28A3	solute carrier family 28 member 3
chr19	19146686	19147288	603	*	0.56568543	1.47E-05	0.002591651	Promoter (1-2kb)	19	19144921	19168987	24067	1	93436	uc010xqm.2	1765	ENSG00000105676	ARMC6	armadillo repeat containing 6
chr12	69346732	69347214	483	*	0.565656165	0.00013112	0.008459228	Intron (uc001sur.3/1368, intron 1 of 8)	12	69244956	69357020	112065	2	1368	uc001sur.3	9806	ENSG00000135678	CPM	carboxypeptidase M
chr15	35293602	35294510	909	*	0.565567043	1.07E-05	0.002245019	Distal Intergenic	15	35270542	35280497	9956	2	54989	uc001ziw.3	-13105	ENSG00000198146	ZNF770	zinc finger protein 770
chr17	30977184	30977677	494	*	0.565506086	0.000380395	0.014448292	Intron (uc002hho.1/4642, intron 19 of 21)	17	30814105	30818271	4167	1	8851	uc002hhn.3	163079	ENSG00000176749	CDK5R1	cyclin dependent kinase 5 regulatory subunit 1
chr2	32397723	32398602	880	*	0.565303739	2.98E-06	0.001160717	Intron (uc002roe.2/55676, intron 2 of 13)	2	32390910	32449181	58272	1	55676	uc010ymw.2	6813	ENSG00000152683	SLC30A6	solute carrier family 30 member 6
chr13	31758385	31759069	685	*	0.565106637	0.000236417	0.011137424	Distal Intergenic	13	31774112	31906411	132300	1	145173	uc010aaz.3	-15043	ENSG00000187676	B3GLCT	beta 3-glucosyltransferase
chr18	18791457	18791979	523	*	0.564903591	0.002290015	0.038002775	Distal Intergenic	18	18822203	19035091	212889	1	80000	uc002ktf.1	-30224	ENSG00000141449	GREB1L	GREB1 like retinoic acid receptor coactivator
chr4	101744491	101745285	795	*	0.56489555	0.00147197	0.029448301	Distal Intergenic	4	101581436	101596270	14835	2	100874275	uc031sgr.1	-148221	ENSG00000250223	LINC01216	long intergenic non-protein coding RNA 1216
chr8	100075254	100075692	439	*	0.564723883	0.000318728	0.013116771	Intron (uc003yis.3/157680, intron 3 of 7)	8	100025494	100889814	864321	1	157680	uc003yiw.4	49760	ENSG00000132549	VPS13B	vacuolar protein sorting 13 homolog B
chr10	101455595	101455992	398	*	0.564586589	0.002896185	0.043275791	Exon (uc001kqa.4/57089, exon 9 of 13)	10	101491958	101507468	15511	1	51076	uc010qpk.2	-35966	ENSG00000119929	CUTC	cutC copper transporter
chr13	21694063	21695053	991	*	0.564362119	1.47E-05	0.002591651	Distal Intergenic	13	21714653	21723224	8572	1	10284	uc001uns.3	-19600	ENSG00000150459	SAP18	Sin3A associated protein 18
chr15	65260253	65261111	859	*	0.564157616	0.001263832	0.027387232	Intron (uc002aod.3/51324, intron 7 of 8)	15	65255363	65281812	26450	2	51324	uc002aod.3	20701	ENSG00000090487	SPG21	SPG21 abhydrolase domain containing, maspardin
chr11	46809798	46810616	819	*	0.563705792	8.13E-05	0.006633214	Exon (uc009ylg.1/9793, exon 14 of 42)	11	46765084	46791743	26660	2	9793	uc001ndh.1	-18055	ENSG00000175216	CKAP5	cytoskeleton associated protein 5
chr15	51890880	51891351	472	*	0.5636134	3.23E-05	0.004070984	Intron (uc002abf.3/23312, intron 1 of 42)	15	51739921	51914967	175047	2	23312	uc002abf.3	23616	ENSG00000104093	DMXL2	Dmx like 2
chr8	17198636	17199272	637	*	0.563437184	0.000189216	0.009933537	5' UTR	8	17159163	17206590	47428	2	9108	uc003wxn.3	7318	ENSG00000003987	MTMR7	myotubularin related protein 7
chr13	96177655	96178496	842	*	0.563364578	1.36E-05	0.002516489	Intron (uc001vmg.2/9071, intron 1 of 4)	13	96131698	96186164	54467	2	100874194	uc031qmx.1	7668	ENSG00000223392	CLDN10-AS1	CLDN10 antisense RNA 1
chr13	37668955	37669301	347	*	0.56329969	0.003528276	0.048231564	Distal Intergenic	13	37677397	37679801	2405	2	122011	uc001uwm.1	10500	ENSG00000180138	CSNK1A1L	casein kinase 1 alpha 1 like
chr12	81334402	81335002	601	*	0.562832281	0.001902306	0.03418582	Promoter (2-3kb)	12	81191171	81331694	140524	2	8825	uc001szk.1	-2708	ENSG00000111052	LIN7A	lin-7 homolog A, crumbs cell polarity complex component
chr2	205068132	205068725	594	*	0.562795877	0.004198201	0.053401045	Distal Intergenic	2	204801471	204826298	24828	1	29851	uc010fua.3	266661	ENSG00000163600	ICOS	inducible T cell costimulator
chr19	54560051	54560600	550	*	0.562748939	0.000544716	0.017530879	Intron (uc002qcw.4/284415, intron 3 of 8)	19	54544080	54567207	23128	2	284415	uc002qcw.4	6607	ENSG00000189068	VSTM1	V-set and transmembrane domain containing 1
chr12	8196256	8197056	801	*	0.56263946	3.69E-05	0.004336724	Exon (uc001qtt.1/55810, exon 4 of 9)	12	8185359	8208118	22760	1	55810	uc001qtu.3	10897	ENSG00000065970	FOXJ2	forkhead box J2
chr1	225865963	225866818	856	*	0.56242585	0.000112962	0.007825545	Distal Intergenic	1	225674534	225840845	166312	2	55740	uc001hpd.1	-25118	ENSG00000154380	ENAH	ENAH actin regulator
chr2	63757833	63758310	478	*	0.562295747	0.001588389	0.030785438	Intron (uc002sch.3/51057, intron 1 of 17)	2	63630844	63711823	80980	2	51057	uc010fcr.1	-46010	ENSG00000143951	WDPCP	WD repeat containing planar cell polarity effector
chr11	59041277	59041797	521	*	0.562281507	0.002164709	0.036884121	Distal Intergenic	11	58975983	58980494	4512	2	219972	uc001nnu.4	-60783	ENSG00000197629	MPEG1	macrophage expressed 1
chr7	132443610	132444536	927	*	0.562031177	1.03E-05	0.002199138	Distal Intergenic	7	132333553	132413528	79976	1	286023	uc003vrd.1	110057	ENSG00000183470	FLJ40288	uncharacterized FLJ40288
chr17	30199585	30200221	637	*	0.561939558	0.000173721	0.009627181	Intron (uc002hgq.3/55813, intron 9 of 11)	17	30178884	30186326	7443	2	55352	uc010css.3	-13259	ENSG00000172301	COPRS	coordinator of PRMT5 and differentiation stimulator
chr4	77184067	77184495	429	*	0.561511803	0.000569772	0.01797534	Intron (uc003hjv.3/100129583, intron 2 of 7)	4	77172853	77232283	59431	1	100631383	uc011cbw.2	11214	ENSG00000272414	FAM47E-STBD1	FAM47E-STBD1 readthrough
chr1	174632461	174632952	492	*	0.561478683	0.002157531	0.036817343	Intron (uc001gjx.3/9910, intron 14 of 20)	1	174669672	174964445	294774	1	9910	uc001gkb.4	-36720	ENSG00000152061	RABGAP1L	RAB GTPase activating protein 1 like
chr2	73841362	73841947	586	*	0.561276704	0.000847779	0.02214111	Distal Intergenic	2	73867850	73869537	1688	2	9027	uc002sji.1	27590	ENSG00000144035	NAT8	N-acetyltransferase 8 (putative)
chr19	16880947	16881469	523	*	0.561133314	0.000136315	0.00857345	Intron (uc002net.4/284434, intron 11 of 20)	19	16842003	16928774	86772	1	284434	uc002nev.4	38944	ENSG00000188039	NWD1	NACHT and WD repeat domain containing 1
chr4	17949781	17950190	410	*	0.561000129	0.000437998	0.015569168	Intron (uc021xmq.1/254251, intron 2 of 4)	4	17844839	17964680	119842	2	254251	uc021xmq.1	14490	ENSG00000178177	LCORL	ligand dependent nuclear receptor corepressor like
chr4	108798637	108799503	867	*	0.560813314	0.000649659	0.019135229	Intron (uc003hyl.4/166929, intron 2 of 6)	4	108814420	108836204	21785	1	166929	uc003hyn.3	-14917	ENSG00000164023	SGMS2	sphingomyelin synthase 2
chr2	45722407	45722973	567	*	0.560787588	0.000106645	0.007566212	Intron (uc010yoc.2/55133, intron 6 of 12)	2	45615819	45795154	179336	2	55133	uc010yoc.2	72181	ENSG00000068784	SRBD1	S1 RNA binding domain 1
chr1	97720206	97720678	473	*	0.560716033	8.16E-05	0.006635515	Intron (uc031pne.1/100873932, intron 1 of 4)	1	97561479	97788511	227033	1	100873932	uc031pne.1	158727	ENSG00000232878	DPYD-AS1	DPYD antisense RNA 1
chr5	93867864	93868476	613	*	0.560695764	0.006673766	0.068961252	Intron (uc011cuk.2/285600, intron 3 of 20)	5	93486556	93954309	467754	2	285600	uc011cuk.2	85833	ENSG00000185261	KIAA0825	KIAA0825
chr10	117967932	117968726	795	*	0.560493821	0.008616802	0.079724909	Intron (uc001lci.3/2674, intron 3 of 8)	10	117816442	118031819	215378	2	2674	uc001lci.3	63093	ENSG00000151892	GFRA1	GDNF family receptor alpha 1
chr1	197552061	197552501	441	*	0.560408194	0.001824242	0.033401945	Exon (uc021pgu.1/163486, exon 15 of 23)	1	197574628	197627499	52872	2	163486	uc001gug.4	74998	ENSG00000213047	DENND1B	DENN domain containing 1B
chr3	188838411	188839140	730	*	0.560320958	0.001098675	0.025420576	Intron (uc003frv.2/285386, intron 4 of 10)	3	188889763	189041271	151509	1	285386	uc003frw.2	-50623	ENSG00000188001	TPRG1	tumor protein p63 regulated 1
chr1	161945600	161946103	504	*	0.559902545	4.13E-05	0.004614654	Distal Intergenic	1	161952982	161955022	2041	2	25903	uc001gbt.3	8919	ENSG00000162745	OLFML2B	olfactomedin like 2B
chr2	37280028	37280681	654	*	0.55987679	4.74E-05	0.005002649	Exon (uc002rpp.1/54497, exon 17 of 36)	2	37208153	37311485	103333	2	54497	uc002rpp.1	30804	ENSG00000008869	HEATR5B	HEAT repeat containing 5B
chr4	76895288	76895685	398	*	0.55979416	0.000540815	0.017471941	Intron (uc003hje.4/55153, intron 6 of 21)	4	76871068	76912113	41046	2	55153	uc003hje.4	16428	ENSG00000198301	SDAD1	SDA1 domain containing 1
chr19	44135638	44136030	393	*	0.559723386	0.000504403	0.016875091	Intron (uc002oxc.1/199731, intron 1 of 8)	19	44126522	44143991	17470	2	199731	uc002oxc.1	7961	ENSG00000105767	CADM4	cell adhesion molecule 4
chr7	92028977	92029674	698	*	0.55957295	0.000278507	0.012220872	3' UTR	7	92000791	92030698	29908	1	54467	uc010lew.1	28186	ENSG00000001629	ANKIB1	ankyrin repeat and IBR domain containing 1
chr1	186929410	186930121	712	*	0.559483756	0.003600501	0.048839041	Intron (uc001gsc.3/5321, intron 14 of 17)	1	186798032	186958113	160082	1	5321	uc010pos.2	131378	ENSG00000116711	PLA2G4A	phospholipase A2 group IVA
chr7	2316560	2317067	508	*	0.559452201	6.56E-05	0.005960895	Intron (uc003slw.3/29886, intron 2 of 10)	7	2282540	2290780	8241	1	4521	uc003slv.1	34020	ENSG00000106268	NUDT1	nudix hydrolase 1
chr3	142299742	142300424	683	*	0.559420282	0.000164993	0.009367549	Promoter (2-3kb)	3	142168077	142297668	129592	2	545	uc003eux.4	-2074	ENSG00000175054	ATR	ATR serine/threonine kinase
chr1	60396394	60397044	651	*	0.559240671	0.004240879	0.053699667	Distal Intergenic	1	60358980	60392423	33444	2	1573	uc001czq.3	-3971	ENSG00000134716	CYP2J2	cytochrome P450 family 2 subfamily J member 2
chr5	146821661	146822497	837	*	0.559213369	2.96E-05	0.00390315	Intron (uc003lon.1/1809, intron 1 of 13)	5	146770371	146833260	62890	2	1809	uc003lon.1	10763	ENSG00000113657	DPYSL3	dihydropyrimidinase like 3
chr5	126026279	126026821	543	*	0.559166218	0.002399425	0.03905376	Distal Intergenic	5	125967414	125971974	4561	1	389320	uc003kub.1	58865	ENSG00000196900	TEX43	testis expressed 43
chr5	157378334	157379021	688	*	0.55903738	0.000256201	0.011604865	Distal Intergenic	5	157212751	157286183	73433	2	9685	uc011ddv.2	-92151	ENSG00000113282	CLINT1	clathrin interactor 1
chr9	125970034	125970852	819	*	0.558989235	9.66E-05	0.007185188	Intron (uc004bns.3/55342, intron 2 of 18)	9	125883908	126030855	146948	2	55342	uc004bns.3	60003	ENSG00000165209	STRBP	spermatid perinuclear RNA binding protein
chr5	164078345	164079298	954	*	0.558892235	0.001392608	0.028680474	Distal Intergenic	5	162944463	162946359	1897	1	27430	uc003lzm.4	1133882	ENSG00000038274	MAT2B	methionine adenosyltransferase 2B
chr2	179786500	179786990	491	*	0.55864477	0.004249467	0.053747927	Intron (uc002une.2/285025, intron 6 of 23)	2	179700492	179749819	49328	2	285025	uc002unf.1	-36681	ENSG00000163492	CCDC141	coiled-coil domain containing 141
chr7	48494020	48494777	758	*	0.558554014	0.00227304	0.037836863	Promoter (<=1kb)	7	48494634	48687091	192458	1	154664	uc010kyu.1	0	ENSG00000179869	ABCA13	ATP binding cassette subfamily A member 13
chr12	93344005	93344555	551	*	0.558532448	0.000511471	0.017014725	Distal Intergenic	12	93166285	93323107	156823	2	8411	uc001tck.3	-20898	ENSG00000102189	EEA1	early endosome antigen 1
chr10	15702233	15702626	394	*	0.558343356	0.000828874	0.021886118	Intron (uc001ioc.1/8516, intron 9 of 29)	10	15559088	15761770	202683	2	8516	uc001ioc.1	59144	ENSG00000077943	ITGA8	integrin subunit alpha 8
chr12	14797230	14798193	964	*	0.558323556	0.003682751	0.049537054	Exon (uc001rcd.3/2984, exon 16 of 27)	12	14765568	14849519	83952	2	2984	uc001rcd.3	51326	ENSG00000070019	GUCY2C	guanylate cyclase 2C
chr16	5154962	5155681	720	*	0.558128431	0.000310733	0.012920101	Distal Intergenic	16	5134301	5147789	13489	2	196483	uc002cyp.2	-7173	ENSG00000118894	EEF2KMT	eukaryotic elongation factor 2 lysine methyltransferase
chr13	53645037	53645503	467	*	0.558078984	0.003631338	0.049041827	Distal Intergenic	13	53602876	53626196	23321	1	10562	uc001vhl.3	42161	ENSG00000102837	OLFM4	olfactomedin 4
chr6	71912600	71912947	348	*	0.558076971	0.000802124	0.021464913	Distal Intergenic	6	71998477	72012230	13754	1	79627	uc003pfx.1	-85530	ENSG00000119900	OGFRL1	opioid growth factor receptor like 1
chr1	175981838	175982300	463	*	0.557928664	0.000740927	0.020549583	Intron (uc009wwv.2/64326, intron 12 of 16)	1	175937533	175937676	144	2	677679	uc001gkx.1	-44162	ENSG00000252906	SCARNA3	small Cajal body-specific RNA 3
chr6	166159113	166159587	475	*	0.55789317	0.001650555	0.031439419	Distal Intergenic	6	165740776	166075588	334813	2	10846	uc003quo.3	-83525	ENSG00000112541	PDE10A	phosphodiesterase 10A
chr1	147101599	147102178	580	*	0.557815724	0.00014829	0.008903638	Distal Intergenic	1	147083377	147096757	13381	1	607	uc010ozr.1	18222	ENSG00000116128	BCL9	BCL9 transcription coactivator
chr1	65557823	65558659	837	*	0.557485138	2.78E-05	0.003766894	Distal Intergenic	1	65524117	65524191	75	2	406893	uc001dbx.3	-33632	ENSG00000199135	MIR101-1	microRNA 101-1
chr7	99318951	99319539	589	*	0.557392636	0.000968656	0.023807115	Intron (uc003urn.3/221785, intron 8 of 10)	7	99282302	99332819	50518	2	100861540	uc031syj.1	13280	ENSG00000282301	CYP3A7-CYP3A51P	CYP3A7-CYP3A51P readthrough
chr11	59926115	59926670	556	*	0.557276139	0.00025193	0.01152204	Distal Intergenic	11	59939080	59950804	11725	2	64231	uc001noq.3	24134	ENSG00000110077	MS4A6A	membrane spanning 4-domains A6A
chr10	29781872	29782712	841	*	0.557225679	3.55E-06	0.00127626	Promoter (2-3kb)	10	29769090	29785447	16358	2	6840	uc009xlc.2	2735	ENSG00000197321	SVIL	supervillin
chr2	102154501	102155087	587	*	0.557225048	3.02E-05	0.003937461	Distal Intergenic	2	102013823	102091165	77343	2	731220	uc010yvx.1	-63336	ENSG00000196460	RFX8	RFX family member 8, lacking RFX DNA binding domain
chr4	26359773	26360149	377	*	0.557217463	0.000144606	0.008856854	Intron (uc003grx.2/3516, intron 2 of 11)	4	26322429	26436752	114324	1	3516	uc003gsb.2	37344	ENSG00000168214	RBPJ	recombination signal binding protein for immunoglobulin kappa J region
chr15	66211775	66212274	500	*	0.557005069	0.000104377	0.007471146	Intron (uc002apl.2/84465, intron 13 of 20)	15	66161797	66184329	22533	1	8766	uc010ujk.2	49978	ENSG00000103769	RAB11A	RAB11A, member RAS oncogene family
chr2	99494739	99495307	569	*	0.556990869	0.00255298	0.0404406	Intron (uc002szf.1/343990, intron 1 of 9)	2	99410309	99552684	142376	2	343990	uc002szf.1	57377	ENSG00000196872	KIAA1211L	KIAA1211 like
chr1	174435742	174436189	448	*	0.556908441	0.000133529	0.008501328	Intron (uc001gjw.3/9910, intron 13 of 13)	1	174417212	174418683	1472	1	9293	uc001gka.1	18530	ENSG00000203737	GPR52	G protein-coupled receptor 52
chr15	50924258	50924618	361	*	0.556842647	4.78E-05	0.005037654	Intron (uc001zyt.4/54822, intron 9 of 38)	15	50896144	50916497	20354	2	54822	uc001zyu.3	-7761	ENSG00000092439	TRPM7	transient receptor potential cation channel subfamily M member 7
chr13	46690616	46691242	627	*	0.556595943	4.01E-05	0.004569064	Distal Intergenic	13	46627322	46679211	51890	2	1361	uc031qlk.1	-11405	ENSG00000080618	CPB2	carboxypeptidase B2
chr2	43094353	43094817	465	*	0.556543989	0.000194137	0.010057196	Distal Intergenic	2	42997027	43019751	22725	2	23498	uc010ynw.1	-74602	ENSG00000162882	HAAO	3-hydroxyanthranilate 3,4-dioxygenase
chr11	73553487	73554152	666	*	0.556530755	0.000296209	0.012637853	Intron (uc001ouh.4/51642, intron 4 of 7)	11	73587744	73638781	51038	1	80227	uc031qcp.1	-33592	ENSG00000175575	PAAF1	proteasomal ATPase associated factor 1
chr1	100327994	100328576	583	*	0.556331799	8.58E-05	0.006759631	Promoter (1-2kb)	1	100326766	100389579	62814	1	178	uc001dsn.1	1228	ENSG00000162688	AGL	amylo-alpha-1, 6-glucosidase, 4-alpha-glucanotransferase
chr9	114987008	114987512	505	*	0.556032286	8.14E-06	0.001944235	Intron (uc022bma.1/100422990, intron 2 of 2)	9	114803061	114937556	134496	2	64420	uc010muj.3	-49452	ENSG00000106868	SUSD1	sushi domain containing 1
chr2	36743342	36743677	336	*	0.556021177	0.002077054	0.03603552	Intron (uc002rpd.3/51232, intron 11 of 16)	2	36779404	36821709	42306	2	9637	uc002rpf.2	78032	ENSG00000171055	FEZ2	fasciculation and elongation protein zeta 2
chr14	21936917	21937414	498	*	0.555902067	0.000222298	0.010847044	Intron (uc010tls.2/84932, intron 2 of 6)	14	21927179	21944832	17654	2	84932	uc010tls.2	7418	ENSG00000129472	RAB2B	RAB2B, member RAS oncogene family
chr17	58159354	58160207	854	*	0.55570857	3.17E-07	0.000373265	Downstream (<1kb)	17	58120552	58156292	35741	2	63897	uc002iyk.1	-3062	ENSG00000068097	HEATR6	HEAT repeat containing 6
chr2	187525041	187525478	438	*	0.555701609	0.001213378	0.026836573	Intron (uc002upq.4/3685, intron 18 of 29)	2	187558789	187628335	69547	1	165215	uc002upr.1	-33311	ENSG00000144369	FAM171B	family with sequence similarity 171 member B
chr5	79097309	79097964	656	*	0.555515024	0.00013128	0.008459228	Distal Intergenic	5	78985659	79096049	110391	1	202333	uc003kgc.3	111650	ENSG00000164309	CMYA5	cardiomyopathy associated 5
chr8	102845027	102845802	776	*	0.555484774	0.000219887	0.010772462	Intron (uc003ykf.3/83988, intron 4 of 7)	8	102698770	102803439	104670	2	83988	uc003yke.3	-41588	ENSG00000104490	NCALD	neurocalcin delta
chr6	107036600	107037206	607	*	0.555447329	0.001455367	0.029348021	Intron (uc003prj.3/84816, intron 6 of 8)	6	107018903	107077373	58471	2	84816	uc003prj.3	40167	ENSG00000130347	RTN4IP1	reticulon 4 interacting protein 1
chr16	9393573	9394326	754	*	0.5551015	0.000182953	0.009850154	Distal Intergenic	16	9328774	9328803	30	1	100422920	uc021tct.1	64799	ENSG00000265841	MIR548X	microRNA 548x
chr2	44472867	44473556	690	*	0.554866028	8.94E-06	0.00204561	Distal Intergenic	2	44502597	44528556	25960	1	6519	uc002rty.3	-29041	ENSG00000138079	SLC3A1	solute carrier family 3 member 1
chr12	58058081	58058528	448	*	0.554662019	0.000287407	0.012448599	Distal Intergenic	12	58087738	58115340	27603	1	10956	uc001spj.3	-29210	ENSG00000135506	OS9	OS9 endoplasmic reticulum lectin
chr9	126860481	126861133	653	*	0.554527333	0.003072871	0.044744379	Distal Intergenic	9	126773889	126795442	21554	1	9355	uc010mwi.1	86592	ENSG00000106689	LHX2	LIM homeobox 2
chr17	70805256	70805890	635	*	0.554430038	1.59E-05	0.002712724	Intron (uc002jja.3/201266, intron 6 of 9)	17	70594180	70636611	42432	2	400619	uc021ucl.1	-168645	ENSG00000227036	LINC00511	long intergenic non-protein coding RNA 511
chr4	37749575	37750025	451	*	0.554370425	0.000129561	0.008407941	Distal Intergenic	4	37612256	37687999	75744	2	768211	uc010ifc.3	-61576	ENSG00000181826	RELL1	RELT like 1
chr2	192058224	192058888	665	*	0.554236925	0.000319526	0.013126658	Distal Intergenic	2	192011339	192038902	27564	2	6775	uc010zgo.1	-19322	ENSG00000138378	STAT4	signal transducer and activator of transcription 4
chr5	114828232	114829009	778	*	0.554032564	0.001214954	0.026843594	Distal Intergenic	5	114856608	114880591	23984	2	56929	uc003krb.1	51582	ENSG00000145780	FEM1C	fem-1 homolog C
chr8	103624299	103624706	408	*	0.554011463	0.000186289	0.009912633	Distal Intergenic	8	103661005	103666168	5164	2	7071	uc011lhj.1	41462	ENSG00000155090	KLF10	Kruppel like factor 10
chr20	5241847	5242535	689	*	0.553960504	0.002382672	0.038895483	Distal Intergenic	20	5282686	5295023	12338	2	128674	uc010zqw.2	52488	ENSG00000101292	PROKR2	prokineticin receptor 2
chr9	111486417	111487317	901	*	0.553927809	1.32E-05	0.002501576	Distal Intergenic	9	111616869	111618275	1407	2	10880	uc004bdi.3	130958	ENSG00000148156	ACTL7B	actin like 7B
chr11	128451919	128452335	417	*	0.55372349	0.000914054	0.023088003	Intron (uc001qej.2/2113, intron 1 of 9)	11	128328656	128457453	128798	2	2113	uc001qej.2	5118	ENSG00000134954	ETS1	ETS proto-oncogene 1, transcription factor
chr7	41354441	41355196	756	*	0.553678507	0.000714038	0.020190718	Distal Intergenic	7	41733514	41752792	19279	1	285954	uc003ths.2	-378318	ENSG00000224116	INHBA-AS1	INHBA antisense RNA 1
chr8	104246071	104246758	688	*	0.553643875	4.88E-05	0.005067333	Exon (uc003ylf.2/100499183, exon 5 of 6)	8	104225559	104242533	16975	1	79870	uc010mcc.3	20512	ENSG00000164929	BAALC	BAALC binder of MAP3K1 and KLF4
chr7	22616562	22617257	696	*	0.553633669	0.00016798	0.00946769	Distal Intergenic	7	22602956	22613617	10662	1	100506178	uc003svi.2	13606	ENSG00000232759	LOC100506178	uncharacterized LOC100506178
chr18	12364082	12364469	388	*	0.55348916	6.46E-05	0.005931602	Intron (uc002kqz.2/10939, intron 5 of 16)	18	12328943	12377275	48333	2	10939	uc002kqz.2	12806	ENSG00000141385	AFG3L2	AFG3 like matrix AAA peptidase subunit 2
chr13	46604788	46605393	606	*	0.553477963	0.000151893	0.009026958	Intron (uc010tfw.1/23091, intron 3 of 17)	13	46529805	46619648	89844	2	23091	uc010tfw.1	14255	ENSG00000123200	ZC3H13	zinc finger CCCH-type containing 13
chr1	98797462	98797960	499	*	0.553340826	0.000758233	0.020786456	Distal Intergenic	1	98676267	98738214	61948	1	729987	uc031pnf.1	121195	ENSG00000226053	LINC01776	long intergenic non-protein coding RNA 1776
chr19	43097459	43098036	578	*	0.553272854	0.0023218	0.038320695	Promoter (1-2kb)	19	43084395	43099082	14688	2	1088	uc002oud.2	1046	ENSG00000124469	CEACAM8	CEA cell adhesion molecule 8
chr5	68592570	68593197	628	*	0.553253651	0.000357539	0.013874362	Intron (uc003jvv.1/202243, intron 7 of 10)	5	68576519	68616407	39889	2	202243	uc003jvv.1	23210	ENSG00000183323	CCDC125	coiled-coil domain containing 125
chr10	96349353	96349918	566	*	0.553186581	0.000737805	0.020487152	Intron (uc001kjs.3/3070, intron 13 of 21)	10	96305574	96361856	56283	1	3070	uc009xur.3	43779	ENSG00000119969	HELLS	helicase, lymphoid specific
chr6	7562740	7563345	606	*	0.553171218	0.000348063	0.013685947	Exon (uc003mxp.1/1832, exon 5 of 24)	6	7541870	7586946	45077	1	1832	uc021yle.1	20870	ENSG00000096696	DSP	desmoplakin
chr15	63172823	63173641	819	*	0.553163408	4.43E-05	0.004796248	Distal Intergenic	15	63116156	63116240	85	1	406965	uc010uid.1	56667	ENSG00000211137	MIR190A	microRNA 190a
chr9	79877901	79878461	561	*	0.55309549	4.24E-05	0.004675406	Intron (uc004akp.4/23230, intron 23 of 68)	9	79908257	79934589	26333	1	23230	uc010mpo.1	-29796	ENSG00000197969	VPS13A	vacuolar protein sorting 13 homolog A
chr2	201809987	201810765	779	*	0.553040845	7.64E-05	0.006423841	Intron (uc002uwr.3/4999, intron 5 of 17)	2	201774894	201828424	53531	2	4999	uc002uwr.3	17659	ENSG00000115942	ORC2	origin recognition complex subunit 2
chr2	224534327	224534940	614	*	0.552955108	0.008812794	0.080838656	Distal Intergenic	2	224461658	224467217	5560	2	7857	uc002vnm.3	-67110	ENSG00000171951	SCG2	secretogranin II
chr1	46853087	46853853	767	*	0.552918055	3.43E-05	0.004201564	Distal Intergenic	1	46859939	46879520	19582	1	2166	uc001cpu.2	-6086	ENSG00000117480	FAAH	fatty acid amide hydrolase
chr8	116645575	116646003	429	*	0.552909709	6.17E-05	0.005755702	Intron (uc011lhy.2/7227, intron 1 of 5)	8	116420724	116680234	259511	2	7227	uc011lhy.2	34231	ENSG00000104447	TRPS1	transcriptional repressor GATA binding 1
chr10	115591089	115591549	461	*	0.552907083	0.000104542	0.007473386	Downstream (2-3kb)	10	115594483	115613975	19493	2	9937	uc001law.3	22426	ENSG00000198924	DCLRE1A	DNA cross-link repair 1A
chr12	8878534	8879096	563	*	0.552902665	8.00E-06	0.001926639	Intron (uc009zgf.2/57494, intron 2 of 8)	12	8850518	8930398	79881	1	57494	uc001quw.2	28016	ENSG00000166532	RIMKLB	ribosomal modification protein rimK like family member B
chr9	131360051	131360491	441	*	0.552860976	0.000384324	0.014530377	Intron (uc011mbg.2/6709, intron 23 of 24)	9	131388670	131390304	1635	1	6709	uc010mye.1	-28179	ENSG00000197694	SPTAN1	spectrin alpha, non-erythrocytic 1
chr2	144290526	144291106	581	*	0.552710043	0.000112696	0.007821587	Intron (uc002tvm.4/55843, intron 10 of 13)	2	144193163	144525921	332759	1	55843	uc002tvn.3	97363	ENSG00000075884	ARHGAP15	Rho GTPase activating protein 15
chr1	183555951	183556353	403	*	0.552551311	9.23E-05	0.00704494	Exon (uc001gqj.4/4688, exon 2 of 15)	1	183524697	183559739	35043	2	4688	uc001gqj.4	3386	ENSG00000116701	NCF2	neutrophil cytosolic factor 2
chr2	180834826	180835369	544	*	0.552443848	0.000908889	0.023010101	Exon (uc010frh.1/57703, exon 11 of 20)	2	180809604	180824463	14860	2	57703	uc002uno.2	-10363	ENSG00000163510	CWC22	CWC22 spliceosome associated protein homolog
chr5	115496325	115497190	866	*	0.552352369	5.71E-06	0.001633768	Intron (uc003krt.1/51397, intron 5 of 6)	5	115420727	115628978	208252	1	51397	uc003krt.1	75598	ENSG00000145781	COMMD10	COMM domain containing 10
chr9	94879649	94880469	821	*	0.552169529	0.000250952	0.011499642	Promoter (1-2kb)	9	94841346	94877690	36345	2	10558	uc004arn.1	-1959	ENSG00000090054	SPTLC1	serine palmitoyltransferase long chain base subunit 1
chr2	170648527	170648985	459	*	0.551937504	0.000467603	0.016190896	Distal Intergenic	2	170655322	170668571	13250	1	6741	uc002ufk.3	-6337	ENSG00000138385	SSB	small RNA binding exonuclease protection factor La
chr14	39649608	39650102	495	*	0.551925137	0.000257292	0.01164834	Exon (uc001wuw.4/5411, exon 9 of 9)	14	39644387	39652422	8036	1	5411	uc001wuw.4	5221	ENSG00000100941	PNN	pinin, desmosome associated protein
chr20	13489942	13490570	629	*	0.551913974	2.29E-06	0.001033913	Intron (uc010zri.1/55617, intron 4 of 9)	20	13246709	13619583	372875	2	55617	uc010zri.1	129013	ENSG00000089123	TASP1	taspase 1
chr10	30016272	30016755	484	*	0.551873473	1.58E-06	0.000838479	Intron (uc001iuu.1/6840, intron 1 of 35)	10	29746277	30024730	278454	2	6840	uc001iuu.1	7975	ENSG00000197321	SVIL	supervillin
chr3	24014391	24014925	535	*	0.551839275	0.002108226	0.03634774	Intron (uc003ccs.2/9975, intron 7 of 7)	3	23933572	23988053	54482	2	28512	uc003cck.3	-26338	ENSG00000197885	NKIRAS1	NFKB inhibitor interacting Ras like 1
chr20	20552046	20552869	824	*	0.551802705	8.29E-05	0.006673066	Exon (uc002wry.3/57186, exon 13 of 30)	20	20452081	20508902	56822	2	57186	uc002wsa.1	-43144	ENSG00000188559	RALGAPA2	Ral GTPase activating protein catalytic alpha subunit 2
chr9	95290112	95290605	494	*	0.551767936	0.000590718	0.018161106	Promoter (<=1kb)	9	95290266	95290340	75	2	100616351	uc022bjz.1	0	ENSG00000264158	MIR4670	microRNA 4670
chr5	138234642	138235005	364	*	0.551606062	4.40E-05	0.004796248	Intron (uc003ldh.3/1495, intron 9 of 17)	5	138211085	138270723	59639	1	1495	uc003ldl.3	23557	ENSG00000044115	CTNNA1	catenin alpha 1
chr6	17398193	17398891	699	*	0.551521588	0.000268175	0.011963451	Intron (uc010jpk.1/10486, intron 1 of 11)	6	17393736	17558023	164288	1	10486	uc011djd.2	4457	ENSG00000112186	CAP2	cyclase associated actin cytoskeleton regulatory protein 2
chr6	158020159	158020584	426	*	0.551463045	6.99E-05	0.006171602	Intron (uc003qqs.3/79683, intron 3 of 8)	6	158066769	158094977	28209	1	79683	uc010kjn.3	-46185	ENSG00000175048	ZDHHC14	zinc finger DHHC-type containing 14
chr8	109190977	109191477	501	*	0.551454934	0.000848911	0.02214111	Distal Intergenic	8	109213972	109255062	41091	2	3646	uc003ymt.3	63585	ENSG00000104408	EIF3E	eukaryotic translation initiation factor 3 subunit E
chr2	144798552	144799293	742	*	0.551437663	2.43E-05	0.003503727	Intron (uc002tvo.3/79712, intron 4 of 8)	2	144703581	144969146	265566	2	79712	uc002tvo.3	169853	ENSG00000121964	GTDC1	glycosyltransferase like domain containing 1
chr12	112495637	112496069	433	*	0.551299831	0.001016666	0.024414006	Intron (uc001ttm.3/80018, intron 13 of 23)	12	112451152	112461024	9873	1	10961	uc001ttl.1	44485	ENSG00000089248	ERP29	endoplasmic reticulum protein 29
chr6	82852782	82853538	757	*	0.551217128	0.00116157	0.026255892	Distal Intergenic	6	82879956	82915646	35691	2	25998	uc011dyu.1	62108	ENSG00000005700	IBTK	inhibitor of Bruton tyrosine kinase
chr17	56776970	56777554	585	*	0.551165429	9.47E-05	0.00711782	Intron (uc010woa.1/5889, intron 3 of 7)	17	56769968	56780690	10723	1	5889	uc010wob.1	7002	ENSG00000108384	RAD51C	RAD51 paralog C
chr17	36757180	36757584	405	*	0.551149871	0.000721742	0.020273271	Intron (uc002hqd.3/80725, intron 1 of 18)	17	36717699	36760865	43167	2	80725	uc002hqh.1	3281	ENSG00000277363	SRCIN1	SRC kinase signaling inhibitor 1
chr7	5056748	5057281	534	*	0.55110574	0.000891138	0.022787614	Intron (uc003snr.3/100533952, intron 2 of 7)	7	5085452	5112854	27403	1	100533952	uc021zzc.1	-28171	ENSG00000272968	RBAK-RBAKDN	RBAK-RBAKDN readthrough
chr8	25942604	25943122	519	*	0.551000018	0.000470715	0.01628068	Intron (uc003xek.3/5520, intron 7 of 10)	8	25888966	25902640	13675	2	64641	uc003xet.2	-39964	ENSG00000221818	EBF2	EBF transcription factor 2
chr14	57672653	57673087	435	*	0.550894058	0.000493512	0.016679501	3' UTR	14	57669194	57699090	29897	2	10640	uc001xcs.3	26003	ENSG00000070367	EXOC5	exocyst complex component 5
chr18	22125749	22126494	746	*	0.55083003	0.000188041	0.009932329	Distal Intergenic	18	22208146	22242162	34017	1	729950	uc002kvj.1	-81652	ENSG00000265485	LINC01915	long intergenic non-protein coding RNA 1915
chr18	61334484	61335135	652	*	0.5506422	0.007856522	0.075838087	Distal Intergenic	18	61327124	61329197	2074	2	6317	uc010dqc.2	-5287	ENSG00000057149	SERPINB3	serpin family B member 3
chr13	50249095	50249517	423	*	0.550511363	6.30E-06	0.001726507	Intron (uc001vdg.3/84650, intron 1 of 3)	13	50234810	50265623	30814	2	84650	uc001vdg.3	16106	ENSG00000123179	EBPL	EBP like
chr6	125625305	125625882	578	*	0.550362697	3.44E-06	0.001256132	Promoter (2-3kb)	6	125596496	125623282	26787	2	51020	uc003qab.1	-2023	ENSG00000111906	HDDC2	HD domain containing 2
chr4	119932099	119932709	611	*	0.550321357	0.001013741	0.024372537	Intron (uc003icm.4/171024, intron 1 of 3)	4	119944585	119982402	37818	1	171024	uc010inc.3	-11876	ENSG00000172403	SYNPO2	synaptopodin 2
chr6	80701853	80702716	864	*	0.550285472	0.000194289	0.010059527	Distal Intergenic	6	80714322	80752244	37923	1	7272	uc003pjb.4	-11606	ENSG00000112742	TTK	TTK protein kinase
chr11	33575787	33576220	434	*	0.550262718	0.002192984	0.037105991	Intron (uc001mun.1/25758, intron 5 of 10)	11	33563877	33695646	131770	1	25758	uc021qfs.1	11910	ENSG00000110427	KIAA1549L	KIAA1549 like
chr7	323536	323987	452	*	0.550136418	0.004423199	0.054916564	Distal Intergenic	7	330136	331454	1319	1	100288524	uc021zyg.1	-6149	ENSG00000248767	WI2-2373I1.2	forkhead box L1-like
chr4	123996049	123996757	709	*	0.550010642	0.000577502	0.018045515	Intron (uc003iez.4/166378, intron 13 of 15)	4	123844225	124240604	396380	1	166378	uc003iez.4	151824	ENSG00000145375	SPATA5	spermatogenesis associated 5
chr19	18021533	18022234	702	*	0.549963643	0.000560431	0.017812048	Distal Intergenic	19	18043824	18054794	10971	1	115098	uc010xpz.2	-21590	ENSG00000007080	CCDC124	coiled-coil domain containing 124
chr3	131995921	131996566	646	*	0.549950749	0.00587347	0.064094477	Intron (uc003eom.3/131034, intron 2 of 19)	3	131253577	132004254	750678	2	131034	uc003eom.3	7688	ENSG00000196353	CPNE4	copine 4
chr18	20279425	20280167	743	*	0.549907221	0.000224555	0.010861405	Distal Intergenic	18	20513295	20606449	93155	1	5932	uc002ktw.3	-233128	ENSG00000101773	RBBP8	RB binding protein 8, endonuclease
chr11	14584502	14584967	466	*	0.549780326	0.003994916	0.051989173	Intron (uc001mll.3/5682, intron 2 of 10)	11	14535512	14541991	6480	2	5682	uc010rcq.2	-42511	ENSG00000129084	PSMA1	proteasome 20S subunit alpha 1
chr2	143994387	143995307	921	*	0.549665886	9.84E-05	0.00726226	Intron (uc010zbl.1/55843, intron 5 of 7)	2	143886899	144525921	639023	1	55843	uc002tvm.4	107488	ENSG00000075884	ARHGAP15	Rho GTPase activating protein 15
chr10	101609657	101610548	892	*	0.549521962	0.000138188	0.008609506	Exon (uc001kqf.2/1244, exon 31 of 32)	10	101635334	101658042	22709	2	23268	uc010qpl.1	47494	ENSG00000107554	DNMBP	dynamin binding protein
chr8	122005410	122005966	557	*	0.549492934	0.00302638	0.044374386	Distal Intergenic	8	121582500	121824309	241810	2	6641	uc003ype.3	-181101	ENSG00000172164	SNTB1	syntrophin beta 1
chr2	27646818	27647504	687	*	0.54915525	1.53E-05	0.002664585	Distal Intergenic	2	27650657	27665124	14468	1	29959	uc002rko.3	-3153	ENSG00000115216	NRBP1	nuclear receptor binding protein 1
chr19	51675224	51675814	591	*	0.549067617	0.001476222	0.029492156	3' UTR	19	51670585	51676780	6196	1	284367	uc010ycv.2	4639	ENSG00000171101	SIGLEC17P	sialic acid binding Ig like lectin 17, pseudogene
chr5	7821482	7821909	428	*	0.549062788	0.000146568	0.00889922	Intron (uc003jdz.1/108, intron 24 of 24)	5	7830491	7851603	21113	2	134121	uc003jea.5	29694	ENSG00000215217	C5orf49	chromosome 5 open reading frame 49
chr8	41108988	41109631	644	*	0.548966333	0.003692744	0.049628894	Distal Intergenic	8	41119476	41166990	47515	2	6422	uc003xnt.3	57359	ENSG00000104332	SFRP1	secreted frizzled related protein 1
chr3	132015847	132016339	493	*	0.548872785	0.00159659	0.030886783	Distal Intergenic	3	131253577	132004254	750678	2	131034	uc003eom.3	-11593	ENSG00000196353	CPNE4	copine 4
chr5	59515093	59515708	616	*	0.548777829	0.002689042	0.041608064	Intron (uc003jsb.3/5144, intron 1 of 16)	5	59282228	59558386	276159	2	5144	uc003jse.1	42678	ENSG00000113448	PDE4D	phosphodiesterase 4D
chr18	61070878	61071428	551	*	0.548741542	0.000781462	0.021119678	Exon (uc002lix.3/9525, exon 5 of 11)	18	61056425	61089752	33328	2	9525	uc002lix.3	18324	ENSG00000119541	VPS4B	vacuolar protein sorting 4 homolog B
chr20	32851980	32852548	569	*	0.54867611	6.74E-05	0.006028128	Intron (uc002xah.1/434, intron 2 of 2)	20	32848171	32857148	8978	1	434	uc002xah.1	3809	ENSG00000101440	ASIP	agouti signaling protein
chr5	115691391	115692325	935	*	0.548165642	4.72E-07	0.00045354	Distal Intergenic	5	115779251	115785342	6092	2	57556	uc011cwe.2	93017	ENSG00000092421	SEMA6A	semaphorin 6A
chr3	184639006	184639466	461	*	0.548093162	0.001202777	0.02675089	Intron (uc003fpb.1/23355, intron 28 of 46)	3	184603757	184770402	166646	1	23355	uc010hye.1	35249	ENSG00000156931	VPS8	VPS8 subunit of CORVET complex
chr11	17048338	17048782	445	*	0.547690283	0.002353351	0.038638081	Distal Intergenic	11	16809207	17035963	226757	2	144100	uc001mmo.3	-12375	ENSG00000166689	PLEKHA7	pleckstrin homology domain containing A7
chr13	110047943	110048359	417	*	0.54761872	0.00044404	0.015710411	Distal Intergenic	13	109816253	109819651	3399	2	100885782	uc031qng.1	-228292	ENSG00000236242	MYO16-AS1	MYO16 antisense RNA 1
chr13	41298953	41299753	801	*	0.547499114	0.000295246	0.01261392	Promoter (2-3kb)	13	41301964	41302011	48	2	100313896	uc021rip.1	2258	NA	MIR320D1	microRNA 320d-1
chr10	6427090	6427963	874	*	0.547443465	9.38E-06	0.002101858	Distal Intergenic	10	6319650	6377937	58288	1	399715	uc021pms.1	107440	ENSG00000215244	LINC02649	long intergenic non-protein coding RNA 2649
chr17	76807370	76808152	783	*	0.547394818	0.000102514	0.007412912	Promoter (2-3kb)	17	76798406	76810634	12229	2	57602	uc002jwb.1	2482	ENSG00000055483	USP36	ubiquitin specific peptidase 36
chr16	84430079	84431068	990	*	0.547152072	0.000361049	0.013972177	Intron (uc002fhx.3/9914, intron 1 of 26)	16	84438033	84497793	59761	1	9914	uc002fhy.3	-6965	ENSG00000064270	ATP2C2	ATPase secretory pathway Ca2+ transporting 2
chr1	225866851	225867464	614	*	0.546942838	0.000818602	0.021736286	Distal Intergenic	1	225674534	225840845	166312	2	55740	uc001hpd.1	-26006	ENSG00000154380	ENAH	ENAH actin regulator
chr9	37796661	37797288	628	*	0.546781371	0.000476687	0.016420843	Intron (uc004aan.1/uc004aan.1, intron 1 of 1)	9	37800551	37867665	67115	1	79269	uc010mlz.3	-3263	ENSG00000122741	DCAF10	DDB1 and CUL4 associated factor 10
chr9	110970982	110971686	705	*	0.546622739	0.000177735	0.009715731	Distal Intergenic	9	111616869	111618275	1407	2	10880	uc004bdi.3	646589	ENSG00000148156	ACTL7B	actin like 7B
chr7	124533532	124534083	552	*	0.546539525	0.000132255	0.008480404	Intron (uc011koe.2/25913, intron 5 of 18)	7	124462440	124569856	107417	2	25913	uc011koe.2	35773	ENSG00000128513	POT1	protection of telomeres 1
chr4	123167085	123167565	481	*	0.546476005	0.000395268	0.014730308	Exon (uc003ieh.3/84162, exon 31 of 84)	4	123160671	123197336	36666	1	84162	uc003iek.2	6414	ENSG00000138688	KIAA1109	KIAA1109
chr5	16943839	16944364	526	*	0.546342663	0.000703835	0.020007908	Distal Intergenic	5	16814631	16936385	121755	2	4651	uc003jfv.2	-7454	ENSG00000145555	MYO10	myosin X
chr8	17549476	17550087	612	*	0.546332929	5.74E-06	0.001633802	Intron (uc003wxs.3/57509, intron 1 of 9)	8	17501303	17555246	53944	2	57509	uc003wxs.3	5159	ENSG00000129422	MTUS1	microtubule associated scaffold protein 1
chr6	64337191	64337857	667	*	0.546083154	0.001782522	0.032838056	Distal Intergenic	6	64345725	64404654	58930	1	23469	uc003pem.2	-7868	ENSG00000118482	PHF3	PHD finger protein 3
chr1	231626957	231627528	572	*	0.54599189	0.00018344	0.009850154	Distal Intergenic	1	231611510	231612271	762	2	645339	uc021pkl.1	-14686	NA	SNRPD2P2	small nuclear ribonucleoprotein D2 pseudogene 2
chr11	45629228	45629829	602	*	0.545941689	0.003810201	0.050593118	Distal Intergenic	11	45669239	45687206	17968	2	8534	uc001mys.2	57377	ENSG00000175264	CHST1	carbohydrate sulfotransferase 1
chr17	26707133	26707697	565	*	0.545742085	3.85E-05	0.004444871	Intron (uc010wah.1/23098, intron 5 of 5)	17	26711689	26728065	16377	1	23098	uc002hbe.1	-3992	ENSG00000004139	SARM1	sterile alpha and TIR motif containing 1
chr4	103343549	103344455	907	*	0.545558797	0.00030575	0.012806804	Distal Intergenic	4	103182821	103266655	83835	2	64116	uc003hwc.2	-76894	ENSG00000138821	SLC39A8	solute carrier family 39 member 8
chr14	23284902	23285858	957	*	0.545420167	3.84E-05	0.004444871	Promoter (<=1kb)	14	23242432	23285107	42676	2	9056	uc001wgs.4	0	ENSG00000155465	SLC7A7	solute carrier family 7 member 7
chr12	47955004	47955787	784	*	0.545395405	0.002906945	0.043375233	Distal Intergenic	12	48055715	48099844	44130	2	79657	uc001rpr.3	144057	ENSG00000005175	RPAP3	RNA polymerase II associated protein 3
chr5	107673062	107673495	434	*	0.545368693	0.002098291	0.036260275	Intron (uc011cvc.2/64839, intron 4 of 8)	5	107213952	107703654	489703	2	64839	uc003kon.4	30159	ENSG00000145743	FBXL17	F-box and leucine rich repeat protein 17
chr18	74647504	74648454	951	*	0.545305541	1.18E-05	0.002351298	Exon (uc002lmj.3/7776, exon 26 of 32)	18	74690789	74699912	9124	2	4155	uc010dqz.3	51458	ENSG00000197971	MBP	myelin basic protein
chr3	38064948	38065502	555	*	0.545261631	0.00011798	0.00800233	Promoter (<=1kb)	3	38048987	38066278	17292	2	5333	uc003chm.3	776	ENSG00000187091	PLCD1	phospholipase C delta 1
chr15	45969702	45970320	619	*	0.545046672	0.000585156	0.018092775	Intron (uc001zvu.4/58472, intron 7 of 10)	15	45926938	45983492	56555	1	58472	uc001zvv.4	42764	ENSG00000137767	SQOR	sulfide quinone oxidoreductase
chr3	47676515	47677277	763	*	0.5450213	0.000214844	0.010664837	Exon (uc011bbc.1/6599, exon 10 of 14)	3	47627378	47721998	94621	2	6599	uc011bbc.1	44721	ENSG00000173473	SMARCC1	SWI/SNF related, matrix associated, actin dependent regulator of chromatin subfamily c member 1
chr12	20168683	20169158	476	*	0.544579024	9.73E-05	0.007216343	Promoter (1-2kb)	12	20167619	20251802	84184	1	100506393	uc021qvz.1	1064	ENSG00000256287	LINC02398	long intergenic non-protein coding RNA 2398
chr1	159544471	159544979	509	*	0.544566222	0.000160244	0.009271372	Distal Intergenic	1	159557616	159558661	1046	1	325	uc001ftv.3	-12637	ENSG00000132703	APCS	amyloid P component, serum
chr19	43931525	43932397	873	*	0.544480926	0.00064963	0.019135229	Distal Intergenic	19	43919035	43922767	3733	1	83639	uc010xwo.2	12490	ENSG00000131126	TEX101	testis expressed 101
chr3	123227565	123228074	510	*	0.54441393	0.000175521	0.009650526	Intron (uc003egj.2/201562, intron 4 of 6)	3	123001143	123167392	166250	2	111	uc003egh.2	-60173	ENSG00000173175	ADCY5	adenylate cyclase 5
chr4	142169178	142169718	541	*	0.544366838	8.31E-05	0.006673066	Distal Intergenic	4	142142049	142155850	13802	1	27309	uc011chl.2	27129	ENSG00000109445	ZNF330	zinc finger protein 330
chr7	141727259	141727714	456	*	0.544296461	0.00163161	0.031268487	Exon (uc003vwy.3/8972, exon 10 of 48)	7	141695679	141806547	110869	1	8972	uc003vwy.3	31580	ENSG00000257335	MGAM	maltase-glucoamylase
chr15	91591978	91592392	415	*	0.544178306	0.003498264	0.048065477	Distal Intergenic	15	91541774	91565833	24060	2	26276	uc010uqu.1	-26145	ENSG00000184056	VPS33B	VPS33B late endosome and lysosome associated
chr2	233690100	233690537	438	*	0.544095569	0.001225152	0.026998969	Intron (uc002vth.4/26058, intron 20 of 27)	2	233675021	233725289	50269	1	26058	uc002vtq.4	15079	ENSG00000204120	GIGYF2	GRB10 interacting GYF protein 2
chr7	90246829	90247169	341	*	0.544094072	7.04E-05	0.006206208	Intron (uc003ukt.1/5218, intron 5 of 7)	7	90225720	90839904	614185	1	5218	uc003uky.2	21109	ENSG00000058091	CDK14	cyclin dependent kinase 14
chr22	37158706	37159119	414	*	0.543974449	0.000338907	0.013481331	3' UTR	22	37154246	37172177	17932	2	11020	uc003apu.3	13058	ENSG00000100360	IFT27	intraflagellar transport 27
chr12	107466824	107467641	818	*	0.543748251	0.000253154	0.011540083	Intron (uc001tmi.4/1407, intron 1 of 12)	12	107385143	107487635	102493	2	1407	uc001tmi.4	19994	ENSG00000008405	CRY1	cryptochrome circadian regulator 1
chr6	134658929	134659777	849	*	0.543735638	2.53E-05	0.003578566	Distal Intergenic	6	134580931	134639196	58266	2	6446	uc003qep.3	-19733	ENSG00000118515	SGK1	serum/glucocorticoid regulated kinase 1
chr2	168434662	168435150	489	*	0.543659582	0.003841834	0.050829513	Distal Intergenic	2	168675182	168727366	52185	1	8708	uc002udz.1	-240032	ENSG00000172318	B3GALT1	beta-1,3-galactosyltransferase 1
chr5	58340129	58340698	570	*	0.543357529	0.007918694	0.076133569	Intron (uc003jrv.2/5144, intron 5 of 14)	5	58264866	58335339	70474	2	5144	uc003jru.3	-4790	ENSG00000113448	PDE4D	phosphodiesterase 4D
chr4	103203687	103204231	545	*	0.543033377	0.000193354	0.010038727	Intron (uc011ceo.1/64116, intron 6 of 10)	4	103182821	103245469	62649	2	64116	uc003hwa.1	41238	ENSG00000138821	SLC39A8	solute carrier family 39 member 8
chr9	21288547	21289100	554	*	0.54288054	0.000528003	0.017343902	Distal Intergenic	9	21277687	21278562	876	2	3453	uc003zou.1	-9985	NA	IFNA22P	interferon alpha 22, pseudogene
chr3	157190212	157190647	436	*	0.542809361	0.001888147	0.034033826	Intron (uc003fbj.2/79674, intron 2 of 13)	3	157177410	157213295	35886	2	79674	uc021xgk.1	22648	ENSG00000197415	VEPH1	ventricular zone expressed PH domain containing 1
chr6	106236374	106236908	535	*	0.542340423	9.72E-06	0.002141876	Distal Intergenic	6	106534195	106557814	23620	1	639	uc003prd.2	-297287	ENSG00000057657	PRDM1	PR/SET domain 1
chr1	31413824	31414445	622	*	0.54211803	0.000178381	0.009739446	Exon (uc001bsf.1/9698, exon 14 of 16)	1	31408536	31408623	88	2	692234	uc021okk.1	-5201	NA	SNORD103A	small nucleolar RNA, C/D box 103A
chr6	150629953	150630693	741	*	0.542083521	0.000441764	0.015653411	Distal Intergenic	6	150690028	150725765	35738	1	389434	uc003qnu.2	-59335	ENSG00000009765	IYD	iodotyrosine deiodinase
chr19	53211686	53212473	788	*	0.541999569	0.000893925	0.022820401	Intron (uc010eqc.3/81856, intron 3 of 4)	19	53115618	53193886	78269	2	55769	uc031rmq.1	-17800	ENSG00000167766	ZNF83	zinc finger protein 83
chr9	33272405	33273102	698	*	0.541932363	0.000621099	0.018662117	Intron (uc003zsm.4/51510, intron 5 of 7)	9	33264877	33282067	17191	1	51510	uc011lnv.2	7528	ENSG00000086065	CHMP5	charged multivesicular body protein 5
chr10	3666530	3667036	507	*	0.541850907	0.00022914	0.010959239	Intron (uc001igy.1/uc001igy.1, intron 1 of 1)	10	3818188	3827473	9286	2	1316	uc001iha.3	160437	ENSG00000067082	KLF6	Kruppel like factor 6
chr3	134371876	134372330	455	*	0.541620221	0.00140528	0.028834142	Promoter (1-2kb)	3	134343895	134370478	26584	2	339855	uc003eqs.1	-1398	ENSG00000174611	KY	kyphoscoliosis peptidase
chr6	12160451	12160988	538	*	0.54155529	0.000261813	0.011779348	Intron (uc003nac.3/3096, intron 7 of 8)	6	12120123	12165232	45110	1	3096	uc011diq.2	40328	ENSG00000095951	HIVEP1	HIVEP zinc finger 1
chr16	58915621	58916204	584	*	0.541398277	0.000629904	0.018794612	Intron (uc031qwk.1/uc031qwk.1, intron 2 of 3)	16	58741035	58768246	27212	2	2806	uc010vim.1	-147375	ENSG00000125166	GOT2	glutamic-oxaloacetic transaminase 2
chr8	127942542	127943098	557	*	0.541383014	0.000112837	0.007822656	Distal Intergenic	8	128025399	128033259	7861	1	100750225	uc022bbd.1	-82301	ENSG00000253438	PCAT1	prostate cancer associated transcript 1
chr21	16192714	16193321	608	*	0.541365928	0.000122683	0.00817399	Distal Intergenic	21	15964484	16015428	50945	2	388813	uc031rux.1	-177286	ENSG00000155307	LOC388813	uncharacterized protein ENSP00000383407-like
chr3	17057167	17057568	402	*	0.54131625	0.000307159	0.01283151	Intron (uc011awc.2/23228, intron 4 of 6)	3	16974688	16974752	65	1	100500913	uc021wts.1	82479	ENSG00000283885	MIR3714	microRNA 3714
chr19	51615663	51616515	853	*	0.541284796	0.000239656	0.011216982	Distal Intergenic	19	51600863	51611647	10785	2	90353	uc010eop.3	-4016	ENSG00000142544	CTU1	cytosolic thiouridylase subunit 1
chr3	157978214	157978567	354	*	0.541168877	0.005819149	0.063796299	Intron (uc011bou.2/51319, intron 3 of 6)	3	157827841	158262624	434784	1	51319	uc003fbv.4	150373	ENSG00000174891	RSRC1	arginine and serine rich coiled-coil 1
chr1	178834179	178834873	695	*	0.541111624	0.000252616	0.011536565	5' UTR	1	178822729	178838445	15717	2	9068	uc010pnc.1	3572	ENSG00000116194	ANGPTL1	angiopoietin like 1
chr18	32527700	32528176	477	*	0.541010474	0.000174947	0.009647256	Distal Intergenic	18	32556892	32723432	166541	1	10982	uc010xcb.3	-28716	ENSG00000166974	MAPRE2	microtubule associated protein RP/EB family member 2
chr2	225510410	225510964	555	*	0.540971482	9.74E-05	0.007216343	Distal Intergenic	2	225334867	225450114	115248	2	8452	uc010zls.2	-60296	ENSG00000036257	CUL3	cullin 3
chr2	32381997	32382343	347	*	0.540962678	0.001367114	0.028422973	3' UTR	2	32390910	32449181	58272	1	55676	uc002roe.2	-8567	ENSG00000152683	SLC30A6	solute carrier family 30 member 6
chr2	223676843	223677705	863	*	0.540839533	1.31E-05	0.002493314	Distal Intergenic	2	223725732	223808119	82388	1	2181	uc002vni.3	-48027	ENSG00000123983	ACSL3	acyl-CoA synthetase long chain family member 3
chr19	45095528	45096307	780	*	0.540787948	9.30E-05	0.00706789	Distal Intergenic	19	45116940	45140081	23142	1	147710	uc021uvj.1	-20633	ENSG00000216588	IGSF23	immunoglobulin superfamily member 23
chr14	71414142	71414902	761	*	0.54073927	4.28E-06	0.001421445	Intron (uc001xmn.4/22990, intron 2 of 9)	14	71374122	71582099	207978	1	22990	uc010are.1	40020	ENSG00000100731	PCNX1	pecanex 1
chr5	124219629	124220293	665	*	0.540731372	6.28E-05	0.005817427	Distal Intergenic	5	123982372	124084500	102129	2	57507	uc003ktt.1	-135129	ENSG00000168916	ZNF608	zinc finger protein 608
chr6	167100166	167100991	826	*	0.540731261	9.08E-06	0.002048174	Intron (uc003qvc.1/6196, intron 2 of 21)	6	166822854	167040726	217873	2	6196	uc003qvb.1	-59440	ENSG00000071242	RPS6KA2	ribosomal protein S6 kinase A2
chr8	120638737	120639443	707	*	0.540669869	0.000147421	0.00889922	Exon (uc003yos.2/5168, exon 3 of 26)	8	120569317	120651106	81790	2	5168	uc003yos.2	11663	ENSG00000136960	ENPP2	ectonucleotide pyrophosphatase/phosphodiesterase 2
chr3	13180486	13181205	720	*	0.540521163	0.003358777	0.046981443	Distal Intergenic	3	12938542	13114617	176076	2	9922	uc011auw.2	-65869	ENSG00000144711	IQSEC1	IQ motif and Sec7 domain ArfGEF 1
chr8	97756329	97756801	473	*	0.540403864	0.006131786	0.065758433	Intron (uc003yhw.3/10404, intron 1 of 7)	8	97797092	97978571	181480	1	10404	uc010mbe.2	-40291	ENSG00000104324	CPQ	carboxypeptidase Q
chr7	117933545	117934015	471	*	0.540321807	0.002906989	0.043375233	Distal Intergenic	7	117864712	117882784	18073	1	56311	uc003vji.3	68833	ENSG00000106013	ANKRD7	ankyrin repeat domain 7
chr18	42904632	42905310	679	*	0.540241108	0.00058305	0.018075495	Intron (uc002lbb.3/8170, intron 4 of 13)	18	42792947	43263060	470114	1	8170	uc010dnj.3	111685	ENSG00000132874	SLC14A2	solute carrier family 14 member 2
chr1	243380119	243380653	535	*	0.540236171	4.10E-05	0.004602705	Intron (uc021plo.1/9859, intron 3 of 19)	1	243287730	243418708	130979	2	9859	uc021plo.1	38055	ENSG00000143702	CEP170	centrosomal protein 170
chr3	56658252	56658704	453	*	0.540136356	0.001154134	0.026160186	Exon (uc003dib.4/23272, exon 6 of 7)	3	56649897	56655848	5952	1	285331	uc003dia.3	8355	ENSG00000180376	CCDC66	coiled-coil domain containing 66
chr22	19642112	19642836	725	*	0.540121225	0.000542343	0.017500797	Distal Intergenic	22	19701987	19711102	9116	1	100526833	uc002zpv.2	-59151	ENSG00000284874	SEPT5-GP1BB	SEPT5-GP1BB readthrough
chr12	13448784	13449628	845	*	0.54000956	0.000585176	0.018092775	Distal Intergenic	12	13523605	13529679	6075	2	283422	uc001rbs.2	80051	ENSG00000180861	LINC01559	long intergenic non-protein coding RNA 1559
chr10	23620605	23621203	599	*	0.539901023	0.000915996	0.02309013	Intron (uc010qcx.2/256815, intron 2 of 4)	10	23605520	23633772	28253	2	256815	uc010qcx.2	12569	ENSG00000179133	C10orf67	chromosome 10 open reading frame 67
chr14	21378626	21379296	671	*	0.539846495	0.001278068	0.027562296	Distal Intergenic	14	21387500	21424594	37095	1	6036	uc010aif.2	-8204	ENSG00000169385	RNASE2	ribonuclease A family member 2
chr10	102268940	102269625	686	*	0.539737393	0.000526229	0.017303745	Promoter (<=1kb)	10	102254602	102268550	13949	2	25956	uc001krg.1	-390	ENSG00000075826	SEC31B	SEC31 homolog B, COPII coat complex component
chr11	95974608	95975067	460	*	0.539504647	4.95E-06	0.001522234	Intron (uc001pfw.1/84441, intron 1 of 4)	11	96074602	96074690	89	1	100422991	uc021qoz.1	-99535	ENSG00000266192	MIR1260B	microRNA 1260b
chr7	120472186	120472631	446	*	0.539465381	0.00040033	0.014798373	Intron (uc003vjk.3/23554, intron 4 of 7)	7	120427374	120454214	26841	2	23554	uc010lkj.3	-17972	ENSG00000106025	TSPAN12	tetraspanin 12
chr21	19260509	19260955	447	*	0.539363479	0.000571839	0.017980248	Promoter (2-3kb)	21	19207989	19257925	49937	2	54075	uc011aca.1	-2584	NA	CHODL-AS1	CHODL antisense RNA 1
chr20	25307715	25308189	475	*	0.539097172	0.000746628	0.020622593	Intron (uc002wuq.3/26090, intron 2 of 12)	20	25275379	25371618	96240	2	26090	uc002wuq.3	63429	ENSG00000100997	ABHD12	abhydrolase domain containing 12
chr4	76584036	76584734	699	*	0.539001622	1.73E-06	0.000876813	Exon (uc003hir.3/9908, exon 3 of 12)	4	76567953	76598343	30391	2	9908	uc003hir.3	13609	ENSG00000138757	G3BP2	G3BP stress granule assembly factor 2
chr10	45933123	45933601	479	*	0.538758805	0.000108169	0.007631517	Intron (uc001jce.4/240, intron 7 of 13)	10	45952817	45957652	4836	2	220972	uc001jcg.1	24051	ENSG00000165406	MARCHF8	membrane associated ring-CH-type finger 8
chr13	48930951	48931346	396	*	0.538660631	0.001309935	0.027944392	Promoter (2-3kb)	13	48934153	48951170	17018	1	5925	uc010act.1	-2807	ENSG00000139687	RB1	RB transcriptional corepressor 1
chr7	41704546	41705129	584	*	0.538572658	0.001251829	0.027281653	Distal Intergenic	7	41733514	41752792	19279	1	285954	uc003ths.2	-28385	ENSG00000224116	INHBA-AS1	INHBA antisense RNA 1
chr11	62344589	62345581	993	*	0.538316227	2.21E-05	0.003304413	Promoter (2-3kb)	11	62327073	62342401	15329	2	1937	uc010rlw.1	-2188	ENSG00000254772	EEF1G	eukaryotic translation elongation factor 1 gamma
chr12	117955852	117956600	749	*	0.538260563	7.71E-06	0.001896719	Intron (uc001two.2/283455, intron 14 of 19)	12	117645947	117799607	153661	2	4842	uc001twn.2	-156245	ENSG00000089250	NOS1	nitric oxide synthase 1
chr5	71680912	71681592	681	*	0.53818807	0.000179635	0.009752179	Distal Intergenic	5	71616200	71656038	39839	1	79810	uc003kcd.3	64712	ENSG00000049883	PTCD2	pentatricopeptide repeat domain 2
chr2	169871233	169871630	398	*	0.538159774	0.000545903	0.017557932	Intron (uc002ueo.1/8647, intron 3 of 27)	2	169779449	169887833	108385	2	8647	uc002ueo.1	16203	ENSG00000073734	ABCB11	ATP binding cassette subfamily B member 11
chr4	81009157	81009563	407	*	0.537937698	0.001490291	0.029647304	Distal Intergenic	4	80898662	80994477	95816	2	118429	uc010ijn.3	-14680	ENSG00000163297	ANTXR2	ANTXR cell adhesion molecule 2
chr19	36410044	36410675	632	*	0.537889711	0.001833781	0.033504869	Distal Intergenic	19	36395303	36399211	3909	2	7305	uc021utc.1	-10833	ENSG00000011600	TYROBP	TYRO protein tyrosine kinase binding protein
chr14	60615557	60615948	392	*	0.537880294	0.00084576	0.022127434	Intron (uc001xeq.2/64430, intron 9 of 9)	14	60611500	60632211	20712	2	51635	uc001xes.3	16263	ENSG00000100612	DHRS7	dehydrogenase/reductase 7
chr12	93683854	93684413	560	*	0.537792744	0.000479078	0.016479065	Intron (uc021rbu.1/643339, intron 2 of 4)	12	93397534	93771512	373979	2	643339	uc021rbu.1	87099	NA	LOC643339	uncharacterized LOC643339
chr4	77219650	77220033	384	*	0.53774928	0.000147723	0.00889922	Intron (uc003hjy.3/100631383, intron 6 of 6)	4	77227179	77232283	5105	1	8987	uc003hka.3	-7146	ENSG00000118804	STBD1	starch binding domain 1
chr2	232834845	232835248	404	*	0.537663814	0.001952147	0.03471028	Intron (uc002vsm.4/129563, intron 1 of 20)	2	232826293	233208678	382386	1	129563	uc031rrt.1	8552	ENSG00000144535	DIS3L2	DIS3 like 3'-5' exoribonuclease 2
chr9	111809439	111809777	339	*	0.537541071	0.000419958	0.01524251	Promoter (<=1kb)	9	111808509	111808578	70	2	407036	uc004bdu.1	-861	ENSG00000207698	MIR32	microRNA 32
chr4	26264629	26265049	421	*	0.537466053	0.000245792	0.011351682	Distal Intergenic	4	26321332	26436752	115421	1	3516	uc003grx.2	-56283	ENSG00000168214	RBPJ	recombination signal binding protein for immunoglobulin kappa J region
chr4	144250628	144251052	425	*	0.537431707	0.000912565	0.023065934	Distal Intergenic	4	144257983	144395718	137736	1	2549	uc003ijd.3	-6931	ENSG00000109458	GAB1	GRB2 associated binding protein 1
chr7	139790681	139791254	574	*	0.537348461	7.16E-05	0.006229587	3' UTR	7	139723549	139763521	39973	2	64761	uc010lnf.1	-27160	ENSG00000059378	PARP12	poly(ADP-ribose) polymerase family member 12
chr16	68925970	68926513	544	*	0.537182628	4.01E-06	0.001361064	Intron (uc002ewi.4/79613, intron 7 of 17)	16	68877509	69119085	241577	1	79613	uc002ewi.4	48461	ENSG00000103047	TANGO6	transport and golgi organization 6 homolog
chr10	102173008	102173596	589	*	0.537170623	1.30E-05	0.002487383	Distal Intergenic	10	102133333	102148116	14784	1	90271	uc001kra.4	39675	ENSG00000235823	OLMALINC	oligodendrocyte maturation-associated long intergenic non-coding RNA
chr14	52776225	52776639	415	*	0.537104746	0.000295154	0.01261392	Distal Intergenic	14	52781016	52795322	14307	1	5732	uc001wzr.3	-4377	ENSG00000125384	PTGER2	prostaglandin E receptor 2
chr1	207229923	207230878	956	*	0.537090963	0.000633343	0.01884943	Promoter (1-2kb)	1	207228046	207251162	23117	1	5208	uc009xcc.3	1877	ENSG00000123836	PFKFB2	6-phosphofructo-2-kinase/fructose-2,6-biphosphatase 2
chr5	102435942	102436579	638	*	0.536976163	0.000582485	0.018067405	Intron (uc003koa.1/54826, intron 4 of 7)	5	102421704	102455842	34139	2	54826	uc003koa.1	19263	ENSG00000145723	GIN1	gypsy retrotransposon integrase 1
chr3	192593952	192594601	650	*	0.536922346	9.74E-05	0.007216343	Intron (uc011bsp.2/151963, intron 1 of 1)	3	192514605	192635950	121346	2	151963	uc011bsp.2	41349	ENSG00000180611	MB21D2	Mab-21 domain containing 2
chr3	141989688	141990090	403	*	0.536860011	0.001112577	0.02561623	Distal Intergenic	3	141917644	141944449	26806	2	256356	uc010hut.2	-45239	ENSG00000175066	GK5	glycerol kinase 5
chr16	21708430	21708809	380	*	0.53672936	0.007060613	0.071263347	Intron (uc021tel.1/uc021tel.1, intron 2 of 3)	16	21716284	21772050	55767	1	146183	uc002dji.3	-7475	ENSG00000155719	OTOA	otoancorin
chr7	89912982	89913664	683	*	0.536664287	7.64E-06	0.001896719	Intron (uc003ukf.2/79846, intron 13 of 18)	7	89908991	89940377	31387	1	79846	uc011khk.2	3991	ENSG00000105792	CFAP69	cilia and flagella associated protein 69
chr3	112263754	112264191	438	*	0.536632683	0.001329013	0.028090298	Intron (uc003dzc.3/64422, intron 5 of 10)	3	112251357	112280485	29129	2	64422	uc003dzc.3	16294	ENSG00000144848	ATG3	autophagy related 3
chr16	47047778	47048413	636	*	0.536403445	0.000269755	0.011998952	Distal Intergenic	16	46989274	47007625	18352	2	10294	uc002eeo.2	-40153	ENSG00000069345	DNAJA2	DnaJ heat shock protein family (Hsp40) member A2
chr6	89368466	89368857	392	*	0.536375889	9.90E-05	0.007273526	Intron (uc003pmr.2/8732, intron 14 of 15)	6	89319989	89673348	353360	2	8732	uc003pmr.2	304491	ENSG00000111880	RNGTT	RNA guanylyltransferase and 5'-phosphatase
chr9	95483557	95484276	720	*	0.536340161	3.25E-06	0.001224092	Intron (uc004aso.1/23299, intron 3 of 7)	9	95473645	95527083	53439	2	23299	uc004aso.1	42807	ENSG00000185963	BICD2	BICD cargo adaptor 2
chr13	80444805	80445324	520	*	0.536302281	0.00044611	0.015742196	Distal Intergenic	13	80079509	80130212	50704	1	54602	uc001vlg.3	365296	ENSG00000102471	NDFIP2	Nedd4 family interacting protein 2
chr3	23525296	23526233	938	*	0.536217699	0.000226493	0.010899106	Intron (uc010hfc.2/7325, intron 3 of 4)	3	23375626	23648882	273257	1	100616384	uc021wtz.1	149670	ENSG00000264419	MIR548AC	microRNA 548ac
chr1	12761110	12761982	873	*	0.536192511	0.000655078	0.019222623	Distal Intergenic	1	12776118	12788726	12609	1	126767	uc001aug.1	-14136	ENSG00000188984	AADACL3	arylacetamide deacetylase like 3
chr12	43712435	43713281	847	*	0.536164483	0.001261228	0.027357011	Distal Intergenic	12	43816622	43833554	16933	2	80070	uc001rno.1	120273	ENSG00000173157	ADAMTS20	ADAM metallopeptidase with thrombospondin type 1 motif 20
chr5	133478530	133479073	544	*	0.536146937	0.000525701	0.017292776	Promoter (<=1kb)	5	133479283	133483920	4638	1	6932	uc010jdu.3	-210	ENSG00000081059	TCF7	transcription factor 7
chr4	56707771	56708319	549	*	0.536109118	0.001200335	0.02675089	Distal Intergenic	4	56719816	56771244	51429	1	55763	uc003hbe.1	-11497	ENSG00000090989	EXOC1	exocyst complex component 1
chr13	28675195	28675855	661	*	0.536078833	8.76E-05	0.006831557	Promoter (<=1kb)	13	28577411	28674729	97319	2	2322	uc010tdn.2	-466	ENSG00000122025	FLT3	fms related tyrosine kinase 3
chr2	177156089	177156740	652	*	0.536018836	0.000313437	0.012979314	Intron (uc002ukw.3/10651, intron 2 of 10)	2	177134123	177202753	68631	1	10651	uc002ukx.3	21966	ENSG00000128654	MTX2	metaxin 2
chr5	98213772	98214248	477	*	0.535965012	3.41E-05	0.004172506	Intron (uc003knf.3/1105, intron 22 of 34)	5	98190908	98209427	18520	2	1105	uc010jbn.3	-4345	ENSG00000153922	CHD1	chromodomain helicase DNA binding protein 1
chr10	129773333	129773764	432	*	0.535667691	3.50E-05	0.004250339	Intron (uc001lkb.3/5791, intron 1 of 20)	10	129785544	129866550	81007	1	5791	uc010qup.1	-11780	ENSG00000132334	PTPRE	protein tyrosine phosphatase receptor type E
chr11	59373732	59374339	608	*	0.53560812	0.000226137	0.010893157	Intron (uc001noc.1/5007, intron 3 of 13)	11	59344278	59368346	24069	2	5007	uc009ymr.1	-5386	ENSG00000110048	OSBP	oxysterol binding protein
chr2	177865399	177865875	477	*	0.535493751	0.000204392	0.010393814	Distal Intergenic	2	178077422	178084054	6633	1	220988	uc002ulb.1	-211547	ENSG00000170144	HNRNPA3	heterogeneous nuclear ribonucleoprotein A3
chr15	62568022	62568549	528	*	0.535453955	0.002669878	0.04140679	Distal Intergenic	15	62455737	62457482	1746	2	388125	uc002ahg.2	-110540	ENSG00000205502	C2CD4B	C2 calcium dependent domain containing 4B
chr4	158925294	158925893	600	*	0.53544676	0.000692776	0.019856132	Distal Intergenic	4	159045732	159093718	47987	2	51313	uc003ipp.4	167825	ENSG00000164125	GASK1B	golgi associated kinase 1B
chr9	34234506	34234830	325	*	0.535351387	4.11E-06	0.00138116	Intron (uc010mka.2/51271, intron 2 of 4)	9	34220437	34252521	32085	1	51271	uc003ztz.3	14069	ENSG00000165006	UBAP1	ubiquitin associated protein 1
chr3	106955539	106956217	679	*	0.535324284	5.37E-05	0.005378611	Intron (uc003dwf.4/100302640, intron 1 of 7)	3	106555658	106959485	403828	2	100302640	uc003dwf.4	3268	NA	LINC00882	long intergenic non-protein coding RNA 882
chr1	172507827	172508499	673	*	0.535278716	4.42E-05	0.004796248	Intron (uc010pmm.1/51430, intron 1 of 21)	1	172502317	172580973	78657	1	51430	uc010pmo.3	5510	ENSG00000094975	SUCO	SUN domain containing ossification factor
chr19	7141621	7142380	760	*	0.535217568	1.09E-06	0.000693708	Exon (uc002mgd.1/3643, exon 13 of 22)	19	7069471	7087978	18508	1	79230	uc002mgc.3	72150	ENSG00000130544	ZNF557	zinc finger protein 557
chr4	169944267	169944737	471	*	0.535075447	0.002354923	0.038657145	Distal Intergenic	4	169922320	169931468	9149	2	84869	uc003irz.2	-12799	ENSG00000145439	CBR4	carbonyl reductase 4
chr6	82635368	82635936	569	*	0.535063161	0.000866473	0.022409175	Distal Intergenic	6	82455447	82462428	6982	2	55603	uc003pjg.3	-172940	ENSG00000112773	TENT5A	terminal nucleotidyltransferase 5A
chr3	45925749	45926488	740	*	0.534997464	8.48E-05	0.006730397	Promoter (1-2kb)	3	45927996	45944667	16672	1	10803	uc003coz.2	-1508	ENSG00000173585	CCR9	C-C motif chemokine receptor 9
chr4	7912200	7912788	589	*	0.534981193	0.00105795	0.024889218	Intron (uc003gkg.1/60312, intron 1 of 16)	4	7760440	7941653	181214	2	60312	uc003gkg.1	28865	ENSG00000196526	AFAP1	actin filament associated protein 1
chr2	113023590	113024375	786	*	0.534863116	8.64E-05	0.006772027	Distal Intergenic	2	113033178	113097640	64463	1	376940	uc002thq.1	-8803	ENSG00000188177	ZC3H6	zinc finger CCCH-type containing 6
chr15	79875725	79876415	691	*	0.534717188	0.003251183	0.046192062	Distal Intergenic	15	79748440	79764642	16203	1	23251	uc010unk.1	127285	ENSG00000169330	MINAR1	membrane integral NOTCH2 associated receptor 1
chr10	22186365	22186986	622	*	0.534658335	1.36E-05	0.002513899	Intron (uc001irc.3/64215, intron 7 of 11)	10	22045477	22292650	247174	2	64215	uc001irc.3	105664	ENSG00000136770	DNAJC1	DnaJ heat shock protein family (Hsp40) member C1
chr1	161596200	161596988	789	*	0.53465558	1.72E-05	0.002874884	Intron (uc031pqy.1/2215, intron 3 of 4)	1	161592988	161600837	7850	2	2215	uc031pqy.1	3849	ENSG00000162747	FCGR3B	Fc fragment of IgG receptor IIIb
chr20	25524147	25524739	593	*	0.534577506	0.00829629	0.078105145	Intron (uc002wux.1/22981, intron 1 of 23)	20	25471987	25521018	49032	2	22981	uc010ztf.1	-3129	ENSG00000101004	NINL	ninein like
chr3	25792360	25792777	418	*	0.534559264	0.001760176	0.032635416	Exon (uc003cdk.3/55768, exon 3 of 10)	3	25760435	25820179	59745	2	55768	uc003cdk.3	27402	ENSG00000151092	NGLY1	N-glycanase 1
chr10	5925797	5926157	361	*	0.534491487	0.001136299	0.025921331	Exon (uc009xie.3/54522, exon 4 of 6)	10	5931535	5979558	48024	1	84893	uc001iir.4	-5378	ENSG00000134452	FBH1	F-box DNA helicase 1
chr11	71835186	71835973	788	*	0.534454355	3.71E-06	0.001309474	Distal Intergenic	11	71846771	71850934	4164	1	2352	uc001orx.1	-10798	ENSG00000110203	FOLR3	folate receptor gamma
chr10	27778996	27779600	605	*	0.534150221	0.001783029	0.032838056	Distal Intergenic	10	27793103	27831166	38064	1	22931	uc001itv.4	-13503	ENSG00000099246	RAB18	RAB18, member RAS oncogene family
chr1	38974906	38975794	889	*	0.534069412	0.000992146	0.024106512	Distal Intergenic	1	38674706	38680439	5734	2	339442	uc021olp.1	-294467	ENSG00000237290	LINC01343	long intergenic non-protein coding RNA 1343
chr20	60562515	60562912	398	*	0.533914308	0.001428698	0.029070166	Intron (uc002ybs.3/6874, intron 14 of 14)	20	60528602	60528718	117	2	100302168	uc021wfv.1	-33797	ENSG00000284193	MIR1257	microRNA 1257
chr14	76208514	76209059	546	*	0.533876066	7.34E-05	0.006316376	Promoter (2-3kb)	14	76211438	76353650	142213	1	23093	uc001xrz.3	-2379	ENSG00000119685	TTLL5	tubulin tyrosine ligase like 5
chr1	9018931	9019576	646	*	0.533735914	4.11E-05	0.004602705	Exon (uc031plc.1/765, exon 4 of 8)	1	9005893	9035148	29256	1	765	uc031pld.1	13038	ENSG00000131686	CA6	carbonic anhydrase 6
chr3	105280006	105280469	464	*	0.533734717	0.000540402	0.017471941	Intron (uc003dvx.3/214, intron 14 of 15)	3	105263446	105295757	32312	1	214	uc003dvz.3	16560	ENSG00000170017	ALCAM	activated leukocyte cell adhesion molecule
chr11	88102489	88102884	396	*	0.533723818	9.51E-05	0.007138835	Distal Intergenic	11	88053981	88070941	16961	2	1075	uc001pcn.4	-31548	ENSG00000109861	CTSC	cathepsin C
chr15	50198358	50198887	530	*	0.533671223	0.000540685	0.017471941	Intron (uc010ber.3/79895, intron 21 of 28)	15	50187089	50194480	7392	2	79895	uc001zxv.1	-3878	ENSG00000104043	ATP8B4	ATPase phospholipid transporting 8B4 (putative)
chr7	26639437	26640011	575	*	0.53359438	6.90E-05	0.006116675	Distal Intergenic	7	26677490	26686924	9435	1	285941	uc003syb.3	-37479	ENSG00000222004	LINC02860	long intergenic non-protein coding RNA 2860
chr3	122335774	122336724	951	*	0.533539648	3.18E-05	0.004030931	Promoter (1-2kb)	3	122334525	122355536	21012	1	165631	uc011bjt.1	1249	ENSG00000173200	PARP15	poly(ADP-ribose) polymerase family member 15
chr12	82397208	82397673	466	*	0.533488339	0.004374782	0.054600295	Distal Intergenic	12	81652045	82153109	501065	2	8499	uc031qis.1	-244099	ENSG00000139220	PPFIA2	PTPRF interacting protein alpha 2
chr5	115328081	115329053	973	*	0.533408508	0.001227722	0.027042932	Promoter (2-3kb)	5	115331074	115363299	32226	1	206338	uc003krq.3	-2021	ENSG00000172901	LVRN	laeverin
chr15	51266616	51267042	427	*	0.533199444	0.000971911	0.023835882	Intron (uc001zyx.2/23431, intron 15 of 20)	15	51289523	51298097	8575	1	23431	uc010bex.1	-22481	ENSG00000081014	AP4E1	adaptor related protein complex 4 subunit epsilon 1
chr3	141809728	141810229	502	*	0.533141895	0.000207416	0.010440367	Intron (uc003eum.4/7029, intron 3 of 13)	3	141663270	141868386	205117	2	7029	uc003eum.4	58157	ENSG00000114126	TFDP2	transcription factor Dp-2
chr10	50386306	50387059	754	*	0.533105446	5.80E-05	0.005606696	Promoter (<=1kb)	10	50363891	50386446	22556	2	170371	uc001jhl.4	0	ENSG00000204161	TMEM273	transmembrane protein 273
chr13	46579080	46580015	936	*	0.533059998	3.14E-05	0.004020417	Intron (uc010tfw.1/23091, intron 6 of 17)	13	46529805	46542163	12359	2	23091	uc001vaq.2	-36917	ENSG00000123200	ZC3H13	zinc finger CCCH-type containing 13
chr16	82096289	82096838	550	*	0.533006857	0.002904041	0.043365636	Intron (uc002fgv.3/3294, intron 1 of 4)	16	82068858	82132139	63282	1	3294	uc002fgv.3	27431	ENSG00000086696	HSD17B2	hydroxysteroid 17-beta dehydrogenase 2
chr12	60038408	60038954	547	*	0.53289347	0.001875456	0.033936779	Intron (uc001sqs.4/9194, intron 1 of 5)	12	60083118	60183635	100518	1	9194	uc001squ.4	-44164	ENSG00000118596	SLC16A7	solute carrier family 16 member 7
chr3	187045314	187045706	393	*	0.532886597	0.001115969	0.025671143	Distal Intergenic	3	186964142	187009810	45669	2	5648	uc011bse.2	-35504	ENSG00000127241	MASP1	mannan binding lectin serine peptidase 1
chr9	80710858	80711430	573	*	0.532778505	9.30E-05	0.00706789	Distal Intergenic	9	80335191	80646219	311029	2	2776	uc004akw.3	-64639	ENSG00000156052	GNAQ	G protein subunit alpha q
chr9	108283172	108283729	558	*	0.532715606	0.002509379	0.040046623	Intron (uc004bcq.2/83856, intron 9 of 12)	9	108320411	108403399	82989	1	2218	uc004bcr.3	-36682	ENSG00000106692	FKTN	fukutin
chr1	149282706	149283399	694	*	0.532641922	0.000207198	0.010440367	3' UTR	1	149279476	149291742	12267	1	388692	uc010pbf.2	3230	NA	LINC02591	long intergenic non-protein coding RNA 2591
chr17	61833562	61833944	383	*	0.532626119	0.000188836	0.009932329	Exon (uc002jbs.4/57003, exon 7 of 13)	17	61780195	61819330	39136	2	92335	uc002jbr.3	-14232	ENSG00000266173	STRADA	STE20 related adaptor alpha
chr2	231632276	231632878	603	*	0.532480083	0.000492798	0.016670833	Intron (uc002vqx.3/51719, intron 2 of 8)	2	231678747	231685790	7044	1	51719	uc002vqy.3	-45869	ENSG00000135932	CAB39	calcium binding protein 39
chr13	80289499	80289974	476	*	0.532161398	0.002833636	0.04277371	Distal Intergenic	13	80079509	80130212	50704	1	54602	uc001vlg.3	209990	ENSG00000102471	NDFIP2	Nedd4 family interacting protein 2
chr17	34156633	34157339	707	*	0.532010516	1.74E-05	0.002895424	Intron (uc002hkc.4/8148, intron 7 of 15)	17	34136488	34171372	34885	1	8148	uc010ctw.1	20145	ENSG00000270647	TAF15	TATA-box binding protein associated factor 15
chr5	173146828	173147296	469	*	0.531996165	0.000906193	0.022963018	Distal Intergenic	5	173034148	173043666	9519	2	91272	uc003mcr.2	-103162	ENSG00000145919	BOD1	biorientation of chromosomes in cell division 1
chr2	114529478	114530078	601	*	0.53191605	0.00016557	0.00939465	Distal Intergenic	2	114471933	114514400	42468	2	80255	uc002tku.1	-15078	ENSG00000115084	SLC35F5	solute carrier family 35 member F5
chr6	80906545	80906944	400	*	0.531848007	0.000484427	0.016550837	Intron (uc003pjd.2/594, intron 6 of 10)	6	80816344	81055987	239644	1	594	uc003pje.2	90201	ENSG00000083123	BCKDHB	branched chain keto acid dehydrogenase E1 subunit beta
chr12	57351873	57352418	546	*	0.531773166	0.000584363	0.018092775	Promoter (<=1kb)	12	57345216	57351418	6203	2	8608	uc009zpa.3	-455	ENSG00000139547	RDH16	retinol dehydrogenase 16
chr4	83378496	83378992	497	*	0.531752792	5.84E-05	0.005624285	Intron (uc003hmv.3/58478, intron 5 of 5)	4	83351815	83382244	30430	1	58478	uc003hmx.4	26681	ENSG00000145293	ENOPH1	enolase-phosphatase 1
chr10	7944267	7944753	487	*	0.531626203	4.46E-05	0.004807327	Intron (uc010qbd.3/83860, intron 2 of 6)	10	7860467	8057016	196550	1	83860	uc010qbd.3	83800	ENSG00000165632	TAF3	TATA-box binding protein associated factor 3
chr5	72174300	72174932	633	*	0.53160395	7.43E-05	0.006334286	Promoter (<=1kb)	5	72174418	72174490	73	1	100616152	uc021yal.1	0	ENSG00000263593	MIR4804	microRNA 4804
chr10	47030628	47031348	721	*	0.531575723	3.40E-05	0.004172506	Intron (uc001jed.5/653145, intron 3 of 3)	10	46993546	47000568	7023	1	9721	uc001jec.3	37082	ENSG00000204175	GPRIN2	G protein regulated inducer of neurite outgrowth 2
chr10	18997516	18998036	521	*	0.531396759	0.002186686	0.037040796	Distal Intergenic	10	18948313	18966940	18628	1	221079	uc001iqd.1	49203	ENSG00000165997	ARL5B	ADP ribosylation factor like GTPase 5B
chr16	55572052	55572411	360	*	0.531392155	0.001616246	0.031095498	Intron (uc002eie.4/54947, intron 8 of 13)	16	55565951	55620582	54632	1	54947	uc002eic.3	6101	ENSG00000087253	LPCAT2	lysophosphatidylcholine acyltransferase 2
chr20	2094576	2094974	399	*	0.53138297	2.55E-05	0.003580915	Intron (uc002wfw.4/140901, intron 2 of 3)	20	2083414	2129198	45785	1	140901	uc010zpu.2	11162	ENSG00000125834	STK35	serine/threonine kinase 35
chr19	21676127	21676977	851	*	0.531340178	0.005734975	0.063280465	Promoter (<=1kb)	19	21676922	21682696	5775	1	400680	uc002nqc.3	0	ENSG00000268658	LINC00664	long intergenic non-protein coding RNA 664
chr1	221335643	221336429	787	*	0.531299005	3.21E-05	0.00405629	Distal Intergenic	1	221503270	221509638	6369	2	400804	uc001hmw.1	173209	ENSG00000234754	LINC02817	long intergenic non-protein coding RNA 2817
chr7	48239682	48240114	433	*	0.531277731	0.001316247	0.027998091	Intron (uc003top.2/154664, intron 3 of 5)	7	48211057	48687091	476035	1	154664	uc003toq.2	28625	ENSG00000179869	ABCA13	ATP binding cassette subfamily A member 13
chr4	39611172	39611875	704	*	0.531261273	0.000942229	0.023443923	Intron (uc003guo.3/201895, intron 1 of 4)	4	39552546	39585578	33033	2	201895	uc010ifm.3	-25594	ENSG00000163683	SMIM14	small integral membrane protein 14
chr12	92482617	92483432	816	*	0.531240196	0.000914312	0.023088003	Intron (uc031qiz.1/256021, intron 1 of 5)	12	92378752	92535489	156738	2	256021	uc031qiz.1	52057	ENSG00000257242	LINC01619	long intergenic non-protein coding RNA 1619
chr4	84349438	84349860	423	*	0.531239317	0.001787775	0.032887868	Intron (uc003hol.4/113510, intron 12 of 17)	4	84374305	84376944	2640	2	113510	uc003hoo.1	27084	ENSG00000163312	HELQ	helicase, POLQ like
chr9	80314537	80315468	932	*	0.531157071	0.00039696	0.014760778	Distal Intergenic	9	80037995	80263232	225238	2	9630	uc004aku.3	-51305	ENSG00000156049	GNA14	G protein subunit alpha 14
chr13	41718671	41719107	437	*	0.530942981	0.002353332	0.038638081	Intron (uc001uxv.1/uc001uxv.1, intron 1 of 3)	13	41701709	41706936	5228	2	89890	uc001uxu.1	-11735	ENSG00000165572	KBTBD6	kelch repeat and BTB domain containing 6
chr14	35546536	35547123	588	*	0.530938766	0.008371285	0.078495232	Intron (uc001wsp.3/283635, intron 5 of 6)	14	35515610	35552589	36980	1	283635	uc001wsq.3	30926	ENSG00000151327	FAM177A1	family with sequence similarity 177 member A1
chr20	25649064	25649595	532	*	0.53089852	0.000520045	0.017166424	Intron (uc002wuz.3/uc002wuz.3, intron 4 of 4)	20	25654851	25667575	12725	2	26152	uc002wva.3	17980	ENSG00000130684	ZNF337	zinc finger protein 337
chr15	38170527	38171286	760	*	0.53082401	0.000558121	0.017785708	Distal Intergenic	15	38226827	38259925	33099	1	145942	uc001zjv.1	-55541	ENSG00000166069	TMCO5A	transmembrane and coiled-coil domains 5A
chr1	92909495	92910039	545	*	0.530813721	0.000132256	0.008480404	Distal Intergenic	1	92940318	92949356	9039	2	2672	uc001dou.4	39317	ENSG00000162676	GFI1	growth factor independent 1 transcriptional repressor
chr16	78534067	78534664	598	*	0.530787684	1.38E-05	0.002536805	Intron (uc002ffk.3/51741, intron 8 of 8)	16	78133327	79246564	1113238	1	51741	uc010vnk.2	400740	ENSG00000186153	WWOX	WW domain containing oxidoreductase
chr3	168588040	168588731	692	*	0.530623107	0.000383374	0.01451377	Distal Intergenic	3	168530083	168548374	18292	1	93556	uc003ffh.4	57957	NA	EGFEM1P	EGF like and EMI domain containing 1, pseudogene
chr13	41119004	41119678	675	*	0.530568271	3.51E-05	0.004250339	Intron (uc010acc.1/2308, intron 2 of 2)	13	41025071	41055143	30073	2	646982	uc001uxk.3	-63861	ENSG00000215483	LINC00598	long intergenic non-protein coding RNA 598
chr16	67137734	67138103	370	*	0.530548427	0.000314008	0.012979314	Distal Intergenic	16	67143866	67182442	38577	1	80262	uc002erc.3	-5763	ENSG00000125149	C16orf70	chromosome 16 open reading frame 70
chr18	11252076	11252864	789	*	0.530330235	5.52E-06	0.001602987	Distal Intergenic	18	10670244	11148761	478518	2	63895	uc002kos.2	-103315	ENSG00000154864	PIEZO2	piezo type mechanosensitive ion channel component 2
chr13	33608439	33608998	560	*	0.530141921	0.001692935	0.031923473	Intron (uc001uur.1/9365, intron 1 of 3)	13	33590571	33640282	49712	1	9365	uc001uus.3	17868	ENSG00000133116	KL	klotho
chr7	16648878	16649407	530	*	0.529974363	0.003438501	0.047634198	Exon (uc003sti.3/57037, exon 7 of 10)	7	16639401	16685442	46042	2	57037	uc003sti.3	36035	ENSG00000106524	ANKMY2	ankyrin repeat and MYND domain containing 2
chr6	11521507	11521985	479	*	0.529772799	0.001746575	0.03245359	Distal Intergenic	6	11538460	11583757	45298	1	100113407	uc010jpa.4	-16475	ENSG00000205269	TMEM170B	transmembrane protein 170B
chr7	141735918	141736569	652	*	0.529703709	0.00047569	0.016402543	Exon (uc003vwy.3/8972, exon 17 of 48)	7	141695679	141806547	110869	1	8972	uc003vwy.3	40239	ENSG00000257335	MGAM	maltase-glucoamylase
chr20	1710158	1710545	388	*	0.529358471	0.002727533	0.04189927	Distal Intergenic	20	1754011	1760392	6382	2	100289473	uc021vzr.1	49847	ENSG00000232528	LOC100289473	cytoskeleton associated protein 2-like pseudogene
chr12	47542835	47543381	547	*	0.529348827	0.000298035	0.012674648	Intron (uc001rpn.3/91523, intron 2 of 3)	12	47581595	47581674	80	1	100616486	uc021qxh.1	-38214	ENSG00000263838	MIR4698	microRNA 4698
chr5	93417050	93417917	868	*	0.529149549	0.001713047	0.032128847	Intron (uc010jbd.3/83989, intron 1 of 10)	5	92953431	93447404	493974	2	83989	uc010jbd.3	29487	ENSG00000113391	FAM172A	family with sequence similarity 172 member A
chr2	63936864	63937696	833	*	0.529143666	9.56E-05	0.007147082	Distal Intergenic	2	63816285	63834330	18046	1	4190	uc010ypw.2	120579	ENSG00000014641	MDH1	malate dehydrogenase 1
chr3	71284446	71285282	837	*	0.529138679	0.000904898	0.022955916	Intron (uc003dol.3/27086, intron 1 of 16)	3	71003865	71294316	290452	2	27086	uc003dol.3	9034	ENSG00000114861	FOXP1	forkhead box P1
chr12	24447556	24448217	662	*	0.529131382	0.001110501	0.025574689	Intron (uc001rfx.4/6660, intron 3 of 17)	12	24365355	24365429	75	1	100126320	uc021qwc.1	82201	ENSG00000216192	MIR920	microRNA 920
chr6	82607512	82607962	451	*	0.529119067	0.001154277	0.026160186	Distal Intergenic	6	82455447	82462428	6982	2	55603	uc003pjg.3	-145084	ENSG00000112773	TENT5A	terminal nucleotidyltransferase 5A
chr3	32151034	32151819	786	*	0.529042057	1.45E-05	0.002591651	Intron (uc003cew.3/23171, intron 1 of 7)	3	32148003	32210207	62205	1	23171	uc003cew.3	3031	ENSG00000152642	GPD1L	glycerol-3-phosphate dehydrogenase 1 like
chr6	118860395	118860732	338	*	0.528839139	0.002930442	0.043536582	Intron (uc003pxz.2/387119, intron 3 of 12)	6	118869442	118881587	12146	1	5350	uc003pye.3	-8710	ENSG00000198523	PLN	phospholamban
chr4	139409583	139410187	605	*	0.528779686	0.000248486	0.011442411	Distal Intergenic	4	139230865	139345498	114634	1	100874047	uc031sha.1	178718	ENSG00000251372	LINC00499	long intergenic non-protein coding RNA 499
chr2	85985130	85985963	834	*	0.528712211	3.81E-05	0.004428137	Intron (uc002sqm.4/84913, intron 1 of 2)	2	85980909	86018506	37598	1	84913	uc002sqn.3	4221	ENSG00000168874	ATOH8	atonal bHLH transcription factor 8
chr8	100313339	100313863	525	*	0.528557245	0.000601276	0.018362085	Intron (uc003yiu.1/157680, intron 19 of 28)	8	100148893	100523740	374848	1	157680	uc003yix.1	164446	ENSG00000132549	VPS13B	vacuolar protein sorting 13 homolog B
chr16	69074166	69074525	360	*	0.528537241	0.002399196	0.03905376	Exon (uc002ewi.4/79613, exon 17 of 18)	16	69139467	69151570	12104	1	3038	uc010cfh.3	-64942	ENSG00000103044	HAS3	hyaluronan synthase 3
chr5	179750946	179751426	481	*	0.528357764	0.000241302	0.011235962	Exon (uc003mlw.1/9945, exon 9 of 19)	5	179727700	179780315	52616	2	9945	uc003mlw.1	28889	ENSG00000131459	GFPT2	glutamine-fructose-6-phosphate transaminase 2
chr7	38683147	38683583	437	*	0.528349308	0.001939769	0.034581712	Distal Intergenic	7	38423297	38671167	247871	2	273	uc003tgv.3	-11980	ENSG00000078053	AMPH	amphiphysin
chr13	32949640	32950265	626	*	0.528309863	0.002257813	0.037667727	Intron (uc001uub.1/675, intron 20 of 26)	13	32945093	32953652	8560	1	675	uc031qkz.1	4547	ENSG00000139618	BRCA2	BRCA2 DNA repair associated
chr15	90974335	90975081	747	*	0.528307081	0.000211291	0.010537681	Intron (uc002bpl.1/8826, intron 4 of 37)	15	90931473	91045475	114003	1	8826	uc002bpl.1	42862	ENSG00000140575	IQGAP1	IQ motif containing GTPase activating protein 1
chr7	25303317	25303792	476	*	0.528276046	0.007883282	0.075963899	Distal Intergenic	7	25264191	25268105	3915	2	64111	uc003sxo.3	-35212	ENSG00000105954	NPVF	neuropeptide VF precursor
chr15	50371773	50372297	525	*	0.52813083	0.000103379	0.007458261	Intron (uc010ber.3/79895, intron 2 of 28)	15	50150435	50405513	255079	2	79895	uc010ber.3	33216	ENSG00000104043	ATP8B4	ATPase phospholipid transporting 8B4 (putative)
chr13	100138854	100139650	797	*	0.528058484	2.46E-06	0.001085431	Distal Intergenic	13	100153628	100216302	62675	1	9375	uc001voj.2	-13978	ENSG00000125304	TM9SF2	transmembrane 9 superfamily member 2
chr4	25309857	25310832	976	*	0.52749766	4.15E-05	0.004617135	Distal Intergenic	4	25314396	25372005	57610	1	29063	uc003grl.4	-3564	ENSG00000168228	ZCCHC4	zinc finger CCHC-type containing 4
chr7	111472285	111472898	614	*	0.527480487	0.001062464	0.024938475	Intron (uc003vfw.3/9732, intron 10 of 35)	7	111366164	111429080	62917	2	9732	uc011kmm.2	-43205	ENSG00000128512	DOCK4	dedicator of cytokinesis 4
chr22	31982313	31982939	627	*	0.527438377	0.000210643	0.010518408	Intron (uc003ald.2/9814, intron 13 of 18)	22	31969044	32014537	45494	1	9814	uc010gwi.4	13269	ENSG00000198089	SFI1	SFI1 centrin binding protein
chr7	75703769	75704514	746	*	0.527383821	7.13E-05	0.006229587	Distal Intergenic	7	75677393	75695930	18538	1	4191	uc011kgh.2	26376	ENSG00000146701	MDH2	malate dehydrogenase 2
chr8	90764893	90765802	910	*	0.52736392	0.000159563	0.009260446	Distal Intergenic	8	90769975	90803292	33318	1	8767	uc003yee.3	-4173	ENSG00000104312	RIPK2	receptor interacting serine/threonine kinase 2
chr18	76931319	76931982	664	*	0.527214957	7.22E-05	0.006251283	Intron (uc002lmv.1/374868, intron 6 of 12)	18	76873241	77123359	250119	1	374868	uc002lmz.1	58078	ENSG00000166377	ATP9B	ATPase phospholipid transporting 9B (putative)
chr1	101628839	101629367	529	*	0.527202334	0.000313659	0.012979314	Distal Intergenic	1	101702305	101707076	4772	1	1901	uc001dud.2	-72938	ENSG00000170989	S1PR1	sphingosine-1-phosphate receptor 1
chr8	29242677	29243114	438	*	0.527184176	0.000180679	0.009785664	Distal Intergenic	8	29190579	29208267	17689	2	1846	uc003xhm.3	-34410	ENSG00000120875	DUSP4	dual specificity phosphatase 4
chr1	198673677	198674051	375	*	0.527134035	0.000164742	0.00936717	Intron (uc009wzf.2/5788, intron 6 of 17)	1	198608418	198672501	64084	1	5788	uc001guw.1	65259	ENSG00000081237	PTPRC	protein tyrosine phosphatase receptor type C
chr6	49813837	49814406	570	*	0.52699567	0.000639495	0.018948601	Exon (uc003ozw.2/167, exon 5 of 8)	6	49801979	49834218	32240	2	167	uc003ozw.2	19812	ENSG00000124812	CRISP1	cysteine rich secretory protein 1
chr20	18161944	18162528	585	*	0.526987013	0.002227282	0.037383765	Exon (uc021wbb.1/57325, exon 7 of 10)	20	18131465	18169031	37567	1	57325	uc010zru.2	30479	ENSG00000149474	KAT14	lysine acetyltransferase 14
chr2	99936766	99937706	941	*	0.526907727	1.81E-05	0.002966787	Exon (uc002szl.1/51263, exon 12 of 14)	2	99935487	99952860	17374	2	10190	uc002szz.3	15154	ENSG00000115514	TXNDC9	thioredoxin domain containing 9
chr2	128038641	128039256	616	*	0.526747631	0.0004538	0.015879556	Intron (uc002toe.1/2071, intron 3 of 9)	2	128014866	128048469	33604	2	2071	uc002toe.1	9213	ENSG00000163161	ERCC3	ERCC excision repair 3, TFIIH core complex helicase subunit
chr6	123053958	123054787	830	*	0.526565586	8.14E-06	0.001944235	Distal Intergenic	6	123038913	123047518	8606	1	5570	uc011ebq.2	15045	ENSG00000135549	PKIB	cAMP-dependent protein kinase inhibitor beta
chr6	37242416	37242955	540	*	0.52649391	0.00219609	0.037131848	Intron (uc003onn.3/55633, intron 2 of 12)	6	37185418	37225931	40514	2	221468	uc003onm.4	-16485	ENSG00000172738	TMEM217	transmembrane protein 217
chr20	5048558	5049265	708	*	0.526431728	1.58E-05	0.002712724	3' UTR	20	5049129	5093733	44605	2	29058	uc010gbi.3	44468	ENSG00000089063	TMEM230	transmembrane protein 230
chr6	45452086	45452628	543	*	0.526413866	0.000196922	0.010145556	Intron (uc011dvx.2/860, intron 5 of 8)	6	45389914	45518819	128906	1	860	uc003oxt.3	62172	ENSG00000124813	RUNX2	RUNX family transcription factor 2
chr10	96943521	96944492	972	*	0.526354495	0.000889632	0.022763303	Distal Intergenic	10	96953957	96988686	34730	1	142827	uc001kke.3	-9465	ENSG00000173124	ACSM6	acyl-CoA synthetase medium chain family member 6
chr20	36897390	36897751	362	*	0.52630651	0.001915532	0.034330605	Intron (uc002xia.2/uc002xia.2, intron 1 of 2)	20	36853951	36889174	35224	2	85449	uc002xhz.1	-8216	ENSG00000149633	KIAA1755	KIAA1755
chr9	123249102	123249540	439	*	0.526296736	0.001458522	0.029375582	Intron (uc004bkf.4/55755, intron 14 of 37)	9	123151147	123234156	83010	2	55755	uc004bke.3	-14946	ENSG00000136861	CDK5RAP2	CDK5 regulatory subunit associated protein 2
chr8	8421327	8422262	936	*	0.526296604	0.000867606	0.02242973	Distal Intergenic	8	8559666	8561617	1952	1	137075	uc003wsi.3	-137404	ENSG00000253958	CLDN23	claudin 23
chr1	94424805	94425406	602	*	0.526290553	0.001316495	0.027998091	Distal Intergenic	1	94352590	94375012	22423	2	2730	uc031pnc.1	-49793	ENSG00000023909	GCLM	glutamate-cysteine ligase modifier subunit
chr4	88238055	88238503	449	*	0.526169255	5.66E-05	0.00554155	Exon (uc003hqo.2/345275, exon 3 of 7)	4	88224941	88244056	19116	2	345275	uc003hqo.2	5553	ENSG00000170509	HSD17B13	hydroxysteroid 17-beta dehydrogenase 13
chr13	77735235	77735645	411	*	0.526086493	0.00760781	0.074365403	Intron (uc010aev.3/23077, intron 44 of 82)	13	77671505	77700677	29173	2	23077	uc001vkg.1	-34558	ENSG00000005810	MYCBP2	MYC binding protein 2
chr2	160548020	160548596	577	*	0.526038847	0.000321243	0.013173922	Intron (uc002uau.1/29994, intron 2 of 10)	2	160294591	160568946	274356	2	29994	uc002uau.1	20350	ENSG00000123636	BAZ2B	bromodomain adjacent to zinc finger domain 2B
chr9	123276299	123277055	757	*	0.52595913	6.08E-05	0.00571098	Intron (uc004bkf.4/55755, intron 12 of 37)	9	123168425	123298804	130380	2	55755	uc004bki.3	21749	ENSG00000136861	CDK5RAP2	CDK5 regulatory subunit associated protein 2
chr7	11676553	11677133	581	*	0.525902052	0.008272812	0.077960667	Exon (uc021zzn.1/221981, exon 2 of 27)	7	11410062	11871824	461763	2	221981	uc021zzn.1	194691	ENSG00000005108	THSD7A	thrombospondin type 1 domain containing 7A
chr13	21387876	21388237	362	*	0.52581976	0.000208434	0.010457906	Intron (uc001unq.4/64328, intron 9 of 22)	13	21303073	21348095	45023	2	221143	uc009zzr.1	-39781	ENSG00000150456	EEF1AKMT1	EEF1A lysine methyltransferase 1
chr11	18231201	18231902	702	*	0.525783707	0.000678683	0.019700277	Promoter (<=1kb)	11	18230685	18235111	4427	1	494141	uc001mnx.4	516	ENSG00000189332	SLC25A51P4	SLC25A51 pseudogene 4
chr9	79848358	79848698	341	*	0.525743807	0.000875513	0.022516198	Intron (uc004akp.4/23230, intron 17 of 68)	9	79791672	79792833	1162	2	100286938	uc022bij.1	-55525	NA	VPS13A-AS1	VPS13A antisense RNA 1
chr8	27658247	27659025	779	*	0.525584937	0.001091981	0.025327406	Intron (uc003xgg.3/157570, intron 10 of 10)	8	27633016	27636034	3019	1	157570	uc003xgh.3	25231	ENSG00000171320	ESCO2	establishment of sister chromatid cohesion N-acetyltransferase 2
chr3	131674376	131675006	631	*	0.525533591	0.003447181	0.047719306	Intron (uc003eok.3/131034, intron 1 of 15)	3	131704699	131704775	77	2	100847040	uc031sbt.1	29769	ENSG00000265859	MIR5704	microRNA 5704
chr3	187497368	187497894	527	*	0.52551607	0.000727298	0.020345537	Distal Intergenic	3	187439165	187463513	24349	2	604	uc003frq.2	-33855	ENSG00000113916	BCL6	BCL6 transcription repressor
chr12	56317415	56317954	540	*	0.525510706	6.95E-06	0.001840555	Intron (uc001sie.1/84305, intron 1 of 2)	12	56295197	56321051	25855	2	84305	uc001sie.1	3097	ENSG00000170473	PYM1	PYM homolog 1, exon junction complex associated factor
chr22	30457270	30458221	952	*	0.525499494	0.00038851	0.014608273	Distal Intergenic	22	30476453	30573062	96610	1	150280	uc003agy.3	-18232	ENSG00000176635	HORMAD2	HORMA domain containing 2
chr2	99763207	99763582	376	*	0.525401145	0.002953623	0.043724308	Intron (uc002szk.3/150590, intron 2 of 3)	2	99758185	99939196	181012	1	51263	uc002szl.1	5022	ENSG00000185414	MRPL30	mitochondrial ribosomal protein L30
chr3	111624408	111625038	631	*	0.525359793	0.000235855	0.011134016	Intron (uc003dyc.3/90102, intron 3 of 17)	3	111630457	111695364	64908	1	90102	uc003dyi.3	-5419	ENSG00000144824	PHLDB2	pleckstrin homology like domain family B member 2
chr5	115276434	115277421	988	*	0.525271855	0.00095623	0.023629958	Distal Intergenic	5	115298151	115363299	65149	1	206338	uc003kro.3	-20730	ENSG00000172901	LVRN	laeverin
chr3	43602152	43602897	746	*	0.525244309	0.003652287	0.049254042	Exon (uc003cmv.3/55129, exon 9 of 13)	3	43407818	43663560	255743	2	55129	uc003cmv.3	60663	ENSG00000160746	ANO10	anoctamin 10
chr8	48556616	48557224	609	*	0.525201298	0.001081641	0.02518127	Intron (uc010lxs.3/23514, intron 6 of 10)	8	48566650	48648563	81914	1	23514	uc011ldf.2	-9426	ENSG00000164808	SPIDR	scaffold protein involved in DNA repair
chr5	95637283	95637893	611	*	0.525104133	6.13E-05	0.005742534	Distal Intergenic	5	95726040	95748689	22650	2	5122	uc010jbi.2	110796	ENSG00000175426	PCSK1	proprotein convertase subtilisin/kexin type 1
chr14	68230113	68230753	641	*	0.525093607	7.06E-05	0.006215342	Promoter (1-2kb)	14	68217190	68228301	11112	2	23503	uc001xkb.3	-1812	ENSG00000072121	ZFYVE26	zinc finger FYVE-type containing 26
chr2	198926484	198927459	976	*	0.525060619	0.000580227	0.018067405	Intron (uc002uuv.4/5334, intron 2 of 6)	2	198669426	199014608	345183	1	5334	uc010fsp.3	257058	ENSG00000115896	PLCL1	phospholipase C like 1 (inactive)
chr2	9146804	9147187	384	*	0.524898331	0.000384492	0.014530377	Promoter (2-3kb)	2	9000743	9143876	143134	2	129642	uc010yix.1	-2928	ENSG00000143797	MBOAT2	membrane bound O-acyltransferase domain containing 2
chr9	111824723	111825219	497	*	0.524864948	0.000222884	0.010849324	Intron (uc022bln.1/23731, intron 4 of 11)	9	111808509	111808578	70	2	407036	uc004bdu.1	-16145	ENSG00000207698	MIR32	microRNA 32
chr10	27396595	27397130	536	*	0.524857642	0.000786824	0.021215821	Downstream (1-2kb)	10	27293045	27389427	96383	2	22852	uc009xku.1	-7168	ENSG00000107890	ANKRD26	ankyrin repeat domain 26
chr17	25583080	25583515	436	*	0.524836792	0.000394441	0.014730308	Distal Intergenic	17	25620936	25621022	87	2	100616277	uc021ttf.1	37507	ENSG00000263583	MIR4522	microRNA 4522
chr3	154696018	154696893	876	*	0.524650701	0.001851969	0.033695424	Distal Intergenic	3	154741913	154901518	159606	1	4311	uc010hvr.1	-45020	ENSG00000196549	MME	membrane metalloendopeptidase
chr4	153610370	153611262	893	*	0.524642144	0.000662703	0.019361431	Distal Intergenic	4	153547266	153601317	54052	2	201799	uc003imw.2	-9053	ENSG00000170006	TMEM154	transmembrane protein 154
chr12	104299762	104300279	518	*	0.52460779	0.000183262	0.009850154	5' UTR	12	104237527	104323989	86463	2	253724	uc010swf.3	23710	ENSG00000214198	TTC41P	tetratricopeptide repeat domain 41, pseudogene
chr5	17260529	17260933	405	*	0.524558157	6.53E-05	0.005951466	Intron (uc031siz.1/10409, intron 1 of 1)	5	17217670	17276954	59285	1	10409	uc003jfx.4	42859	ENSG00000176788	BASP1	brain abundant membrane attached signal protein 1
chr9	21240180	21240675	496	*	0.5244148	0.003209673	0.045848228	Promoter (<=1kb)	9	21239201	21239978	778	2	3448	uc010mis.3	-202	ENSG00000228083	IFNA14	interferon alpha 14
chr2	173561934	173562877	944	*	0.524205434	0.000171696	0.00956346	Distal Intergenic	2	173600525	173851438	250914	1	11069	uc002uhu.2	-37648	ENSG00000091428	RAPGEF4	Rap guanine nucleotide exchange factor 4
chr8	126608360	126608753	394	*	0.52420454	0.000489344	0.01662551	Distal Intergenic	8	126445943	126450644	4702	1	10221	uc010mdn.3	162417	ENSG00000173334	TRIB1	tribbles pseudokinase 1
chr13	28681458	28682096	639	*	0.524181872	0.00070714	0.020082243	Distal Intergenic	13	28577411	28674729	97319	2	2322	uc010tdn.2	-6729	ENSG00000122025	FLT3	fms related tyrosine kinase 3
chr20	18023131	18023790	660	*	0.524106715	0.00522207	0.059980347	Intron (uc002wqi.1/58495, intron 2 of 3)	20	18004796	18038521	33726	2	58495	uc002wqi.1	14731	ENSG00000125850	OVOL2	ovo like zinc finger 2
chr8	133114105	133114683	579	*	0.524061055	0.001337479	0.028178864	Promoter (2-3kb)	8	133073733	133117512	43780	2	10086	uc011liy.1	2829	ENSG00000132297	HHLA1	HERV-H LTR-associating 1
chr12	110111066	110111502	437	*	0.523946558	0.002363189	0.03873201	Distal Intergenic	12	110152187	110208312	56126	1	84915	uc001tpd.2	-40685	ENSG00000139438	FAM222A	family with sequence similarity 222 member A
chr2	103099387	103100001	615	*	0.523930349	3.52E-05	0.004250339	Intron (uc002tbz.4/389015, intron 2 of 11)	2	103089762	103150431	60670	1	389015	uc002tbz.4	9625	ENSG00000180251	SLC9A4	solute carrier family 9 member A4
chr9	132032347	132032929	583	*	0.523900811	2.92E-05	0.003865608	Distal Intergenic	9	132083295	132084882	1588	1	414318	uc004bxs.2	-50366	NA	C9orf106	chromosome 9 open reading frame 106 (putative)
chr5	16770581	16771201	621	*	0.523865749	0.000144231	0.008839603	Intron (uc003jft.4/4651, intron 9 of 40)	5	16662016	16766307	104292	2	4651	uc010itx.3	-4274	ENSG00000145555	MYO10	myosin X
chr4	36447151	36448040	890	*	0.52362258	0.004662472	0.05637869	Distal Intergenic	4	36335118	36346407	11290	1	401124	uc003gsv.4	112033	ENSG00000197057	DTHD1	death domain containing 1
chr9	114474576	114474998	423	*	0.523618618	0.000822863	0.021816075	Intron (uc004bfq.3/158401, intron 14 of 23)	9	114448901	114521813	72913	2	158401	uc004bfq.3	46815	ENSG00000165181	SHOC1	shortage in chiasmata 1
chr2	10288876	10289438	563	*	0.523603196	3.77E-05	0.004400872	Intron (uc021vds.1/348738, intron 2 of 2)	2	10281981	10350942	68962	1	348738	uc021vds.1	6895	NA	NA	NA
chr15	69613674	69614476	803	*	0.523498972	0.000183765	0.009851134	Intron (uc002arz.2/54852, intron 1 of 8)	15	69606742	69699976	93235	1	54852	uc002asa.2	6932	ENSG00000137819	PAQR5	progestin and adipoQ receptor family member 5
chr8	42981950	42982334	385	*	0.523480428	0.003460549	0.047835842	Distal Intergenic	8	42995592	43057970	62379	1	138050	uc003xpx.4	-13258	ENSG00000165102	HGSNAT	heparan-alpha-glucosaminide N-acetyltransferase
chr6	38383187	38383611	425	*	0.523440311	0.001476716	0.029493411	Intron (uc003ony.4/114781, intron 5 of 9)	6	38136227	38563843	427617	2	114781	uc003ony.4	180232	ENSG00000183826	BTBD9	BTB domain containing 9
chr6	2524540	2525168	629	*	0.523407191	0.007046304	0.071187195	Distal Intergenic	6	2622972	2635298	12327	2	154386	uc003mtw.2	110130	ENSG00000164385	LINC01600	long intergenic non-protein coding RNA 1600
chr11	112206329	112206807	479	*	0.523298771	0.004805053	0.057280279	Distal Intergenic	11	112118876	112131583	12708	2	349633	uc009yyp.2	-74746	ENSG00000188771	PLET1	placenta expressed transcript 1
chr2	75312102	75313082	981	*	0.523279474	1.18E-05	0.002351298	Intron (uc002sng.2/6869, intron 2 of 4)	2	75317939	75318041	103	1	100846995	uc031rok.1	-4857	ENSG00000263909	MIR5000	microRNA 5000
chr7	7871080	7871505	426	*	0.523224236	6.80E-05	0.006061251	Intron (uc011jxf.2/729852, intron 3 of 3)	7	7676575	7758238	81664	2	6119	uc003sri.3	-112842	ENSG00000106399	RPA3	replication protein A3
chr17	40736845	40737587	743	*	0.523188682	0.000274439	0.012098593	5' UTR	17	40724328	40729849	5522	2	29893	uc031ral.1	-6996	ENSG00000131470	PSMC3IP	PSMC3 interacting protein
chr1	97814265	97814830	566	*	0.523138092	0.000326452	0.013283578	Intron (uc001drv.3/1806, intron 16 of 22)	1	97561479	97788511	227033	1	100873932	uc031pne.1	252786	ENSG00000232878	DPYD-AS1	DPYD antisense RNA 1
chr8	6758434	6758990	557	*	0.523055292	0.001801372	0.033086223	Distal Intergenic	8	6728097	6735529	7433	2	1672	uc003wqs.2	-22905	ENSG00000164825	DEFB1	defensin beta 1
chr2	71245236	71245874	639	*	0.52299313	0.000231408	0.011028447	Distal Intergenic	2	71251205	71257060	5856	1	79315	uc002sho.3	-5331	ENSG00000205847	OR7E91P	olfactory receptor family 7 subfamily E member 91 pseudogene
chr5	59442758	59443460	703	*	0.522838312	0.006216552	0.066323877	Intron (uc003jsb.3/5144, intron 2 of 16)	5	59282228	59558386	276159	2	5144	uc003jse.1	114926	ENSG00000113448	PDE4D	phosphodiesterase 4D
chr14	24824091	24824650	560	*	0.522772662	0.001536554	0.030111861	Distal Intergenic	14	24836145	24848810	12666	1	4776	uc010alr.3	-11495	ENSG00000100968	NFATC4	nuclear factor of activated T cells 4
chr2	7215599	7216280	682	*	0.52264857	0.000166591	0.009427983	Distal Intergenic	2	7073188	7095132	21945	1	9781	uc002qyu.3	142411	ENSG00000151692	RNF144A	ring finger protein 144A
chr5	49678897	49679797	901	*	0.522646419	0.000118077	0.008003123	Distal Intergenic	5	49692031	49699299	7269	2	133418	uc010ivq.3	19502	ENSG00000170571	EMB	embigin
chr17	9494486	9495153	668	*	0.522507798	0.002480563	0.039775687	Intron (uc002gly.3/146845, intron 3 of 13)	17	9479944	9546776	66833	1	146845	uc010coc.3	14542	ENSG00000166596	CFAP52	cilia and flagella associated protein 52
chr13	50854627	50855093	467	*	0.522386047	0.003792564	0.050465775	Intron (uc010adl.1/10301, intron 1 of 1)	13	50746154	50747751	1598	1	145165	uc001vej.3	108473	NA	ST13P4	ST13, Hsp70 interacting protein pseudogene 4
chr4	57366499	57367053	555	*	0.522167266	0.00099091	0.024094562	Promoter (<=1kb)	4	57366678	57369847	3170	1	6731	uc003hbx.3	0	ENSG00000174780	SRP72	signal recognition particle 72
chr17	29194305	29194992	688	*	0.522166777	0.001183222	0.026528587	Intron (uc002hfs.1/79915, intron 11 of 22)	17	29161166	29196729	35564	1	79915	uc002hft.1	33139	ENSG00000176208	ATAD5	ATPase family AAA domain containing 5
chr2	166626562	166626938	377	*	0.522107326	0.009898544	0.086065188	3' UTR	2	166604313	166650803	46491	2	2591	uc010fph.1	23865	ENSG00000115339	GALNT3	polypeptide N-acetylgalactosaminyltransferase 3
chr11	19579481	19579979	499	*	0.522045411	0.000975021	0.023887253	Intron (uc001mpp.3/89797, intron 1 of 37)	11	19596857	19596919	63	1	100616118	uc021qeu.1	-16878	ENSG00000265210	MIR4486	microRNA 4486
chr10	35429069	35429441	373	*	0.52201372	9.16E-05	0.007024079	Promoter (2-3kb)	10	35426710	35501886	75177	1	1390	uc001iye.3	2359	ENSG00000095794	CREM	cAMP responsive element modulator
chr11	9668806	9669382	577	*	0.521939522	0.004146578	0.052972052	Distal Intergenic	11	9685628	9763487	77860	1	23075	uc001mhv.3	-16246	ENSG00000133789	SWAP70	switching B cell complex subunit SWAP70
chr14	98106107	98106667	561	*	0.521839215	0.004721936	0.056761242	Intron (uc001yfv.2/100129345, intron 3 of 3)	14	98098984	98152995	54012	2	100129345	uc001yfv.2	46328	ENSG00000197176	LINC02291	long intergenic non-protein coding RNA 2291
chr12	7469417	7470021	605	*	0.521737643	0.000530376	0.017379534	Exon (uc001qsx.1/341392, exon 4 of 13)	12	7456928	7480969	24042	1	341392	uc001qsx.1	12489	ENSG00000215009	ACSM4	acyl-CoA synthetase medium chain family member 4
chr1	149725262	149725656	395	*	0.521676089	0.001145922	0.026052536	Distal Intergenic	1	149754250	149764074	9825	1	2209	uc001esp.4	-28594	ENSG00000150337	FCGR1A	Fc fragment of IgG receptor Ia
chr13	47093130	47093903	774	*	0.521588476	0.000786187	0.021204736	Distal Intergenic	13	47127296	47279755	152460	1	23143	uc010acp.2	-33393	ENSG00000136141	LRCH1	leucine rich repeats and calponin homology domain containing 1
chr14	34988425	34989372	948	*	0.521501692	7.16E-05	0.006229587	Intron (uc001wsd.1/55837, intron 5 of 5)	14	34985135	35008943	23809	2	55837	uc001wsd.1	19571	ENSG00000129518	EAPP	E2F associated phosphoprotein
chr20	52062470	52063265	796	*	0.521495269	0.000212466	0.010575739	Intron (uc002xwo.3/128553, intron 2 of 2)	20	52183610	52199707	16098	2	7764	uc002xwq.4	136442	ENSG00000171940	ZNF217	zinc finger protein 217
chr2	113951873	113952247	375	*	0.521345514	1.41E-05	0.002559468	Promoter (2-3kb)	2	113954772	113960677	5906	1	23550	uc002tjg.3	-2525	ENSG00000125637	PSD4	pleckstrin and Sec7 domain containing 4
chr17	30250303	30250701	399	*	0.521330795	0.000206081	0.010426961	Distal Intergenic	17	30264044	30328057	64014	1	23512	uc002hgs.2	-13343	ENSG00000178691	SUZ12	SUZ12 polycomb repressive complex 2 subunit
chr10	104797535	104797965	431	*	0.521315066	0.004361938	0.05452469	Intron (uc001kwm.3/54805, intron 1 of 7)	10	104847774	104913384	65611	2	22978	uc010qqp.2	115419	ENSG00000076685	NT5C2	5'-nucleotidase, cytosolic II
chr5	153698267	153698584	318	*	0.521302451	0.001146288	0.026054442	Intron (uc003lvg.1/55568, intron 3 of 6)	5	153677501	153800543	123043	1	55568	uc010jid.3	20766	ENSG00000164574	GALNT10	polypeptide N-acetylgalactosaminyltransferase 10
chr3	38229679	38230275	597	*	0.52129857	0.005976297	0.064691301	Intron (uc010hha.1/9943, intron 2 of 10)	3	38207026	38296979	89954	1	9943	uc010hhb.3	22653	ENSG00000172939	OXSR1	oxidative stress responsive kinase 1
chr6	158583810	158584280	471	*	0.521007892	2.01E-05	0.003128135	Promoter (2-3kb)	6	158530536	158587191	56656	2	84947	uc003qrb.2	2911	ENSG00000122335	SERAC1	serine active site containing 1
chr4	173701998	173702615	618	*	0.521006382	0.003335142	0.04682988	Intron (uc003isv.3/442117, intron 5 of 12)	4	174089904	174245118	155215	1	51809	uc003isz.4	-387289	ENSG00000109586	GALNT7	polypeptide N-acetylgalactosaminyltransferase 7
chr11	88188738	88189340	603	*	0.52094962	0.008308111	0.078180043	Distal Intergenic	11	88237744	88257222	19479	1	100873989	uc031qdb.1	-48404	ENSG00000255082	GRM5-AS1	GRM5 antisense RNA 1
chr5	177917287	177917705	419	*	0.520776234	0.004839197	0.057474706	Intron (uc021yiy.1/91522, intron 2 of 28)	5	177664617	178017556	352940	2	91522	uc021yiy.1	99851	ENSG00000050767	COL23A1	collagen type XXIII alpha 1 chain
chr16	89907721	89908262	542	*	0.520679727	6.16E-06	0.001715652	Intron (uc010civ.1/84501, intron 2 of 9)	16	89916274	89937727	21454	1	84501	uc002fpa.1	-8012	ENSG00000204991	SPIRE2	spire type actin nucleation factor 2
chr3	57978555	57979139	585	*	0.520607915	7.97E-05	0.006562955	Distal Intergenic	3	57994127	58157982	163856	1	2317	uc003djj.2	-14988	ENSG00000136068	FLNB	filamin B
chr14	96591447	96592247	801	*	0.520539399	0.000215702	0.010670055	Distal Intergenic	14	96671135	96710503	39369	1	624	uc010avl.2	-78888	ENSG00000168398	BDKRB2	bradykinin receptor B2
chr8	103350611	103351241	631	*	0.520507852	0.000683848	0.019752651	Intron (uc003ykr.2/51366, intron 9 of 58)	8	103264502	103279729	15228	2	51366	uc003ykq.3	-70882	ENSG00000104517	UBR5	ubiquitin protein ligase E3 component n-recognin 5
chr10	101928317	101928755	439	*	0.520482364	0.000151637	0.009023128	Intron (uc001kqn.4/10613, intron 6 of 10)	10	101909847	101945734	35888	2	10613	uc001kqn.4	16979	ENSG00000107566	ERLIN1	ER lipid raft associated 1
chr10	93236041	93237022	982	*	0.520446852	0.000103654	0.007459541	Intron (uc001khl.2/143279, intron 5 of 20)	10	93243847	93274520	30674	1	143279	uc001khn.1	-6825	ENSG00000165338	HECTD2	HECT domain E3 ubiquitin protein ligase 2
chr5	143514517	143515241	725	*	0.520442731	0.001360415	0.028342632	Distal Intergenic	5	143537723	143550278	12556	2	81555	uc003lnk.5	35037	ENSG00000145817	YIPF5	Yip1 domain family member 5
chr20	33322355	33322718	364	*	0.520376953	0.0001378	0.008602333	Intron (uc002xav.3/23054, intron 13 of 15)	20	33292148	33301237	9090	1	58476	uc002xau.1	30207	ENSG00000078804	TP53INP2	tumor protein p53 inducible nuclear protein 2
chr14	35002505	35002840	336	*	0.520239718	0.001504703	0.029783633	Exon (uc001wsd.1/55837, exon 3 of 6)	14	34985135	35008943	23809	2	55837	uc001wsd.1	6103	ENSG00000129518	EAPP	E2F associated phosphoprotein
chr2	102703928	102704384	457	*	0.520117876	0.000428439	0.015413468	Intron (uc010fix.3/3554, intron 1 of 11)	2	102686836	102796334	109499	1	3554	uc010fix.3	17092	ENSG00000115594	IL1R1	interleukin 1 receptor type 1
chr19	52258723	52259205	483	*	0.520113839	0.002177447	0.036969441	Distal Intergenic	19	52249023	52255150	6128	2	2357	uc021uyn.1	-3573	ENSG00000171051	FPR1	formyl peptide receptor 1
chr12	12689381	12690053	673	*	0.520095436	5.34E-06	0.001576174	Intron (uc001rao.2/80824, intron 1 of 6)	12	12626216	12674397	48182	2	80824	uc001ran.2	-14984	ENSG00000111266	DUSP16	dual specificity phosphatase 16
chr1	192535452	192536350	899	*	0.520094821	0.000335279	0.013437936	Distal Intergenic	1	192544857	192548085	3229	1	5996	uc010pou.1	-8507	ENSG00000090104	RGS1	regulator of G protein signaling 1
chr21	30317979	30318457	479	*	0.520058461	0.004736619	0.056823122	Exon (uc002ymr.2/26046, exon 21 of 30)	21	30338692	30359255	20564	2	26046	uc010gll.1	40798	ENSG00000198862	LTN1	listerin E3 ubiquitin protein ligase 1
chr5	96087199	96087958	760	*	0.51988078	0.00138614	0.028603613	Intron (uc003klt.3/831, intron 19 of 30)	5	96093287	96115299	22013	1	831	uc003kmk.3	-5329	ENSG00000153113	CAST	calpastatin
chr13	95660211	95660871	661	*	0.519854474	0.001648485	0.031430888	Distal Intergenic	13	95672083	95715113	43031	2	10257	uc010afj.3	54242	ENSG00000125257	ABCC4	ATP binding cassette subfamily C member 4
chr9	114390529	114391333	805	*	0.519808996	0.000180583	0.009785664	Promoter (2-3kb)	9	114393632	114416631	23000	1	548645	uc004bfl.3	-2299	ENSG00000059769	DNAJC25	DnaJ heat shock protein family (Hsp40) member C25
chr1	38972953	38973827	875	*	0.519785149	0.0008075	0.021544872	Distal Intergenic	1	38674706	38680439	5734	2	339442	uc021olp.1	-292514	ENSG00000237290	LINC01343	long intergenic non-protein coding RNA 1343
chr11	127997423	127997848	426	*	0.519748537	0.001627786	0.031225668	Distal Intergenic	11	128328656	128392205	63550	2	2113	uc009zcg.2	394357	ENSG00000134954	ETS1	ETS proto-oncogene 1, transcription factor
chr12	27184528	27185265	738	*	0.519602648	0.000433316	0.015498462	Distal Intergenic	12	27175455	27183606	8152	1	9412	uc031qgt.1	9073	ENSG00000152944	MED21	mediator complex subunit 21
chr5	169256805	169257469	665	*	0.51953039	9.39E-05	0.007091015	Intron (uc003maf.3/1794, intron 26 of 51)	5	169130953	169510386	379434	1	1794	uc010jjm.3	125852	ENSG00000134516	DOCK2	dedicator of cytokinesis 2
chr3	131941911	131942362	452	*	0.519446699	0.006656806	0.068856772	Intron (uc003eom.3/131034, intron 2 of 19)	3	131253577	132004254	750678	2	131034	uc003eom.3	61892	ENSG00000196353	CPNE4	copine 4
chr7	36418340	36419154	815	*	0.519144352	0.000278512	0.012220872	Intron (uc003tfd.2/23366, intron 2 of 6)	7	36429432	36493400	63969	1	54443	uc003tff.3	-10278	ENSG00000011426	ANLN	anillin actin binding protein
chr5	137567545	137568212	668	*	0.519028109	8.78E-05	0.006836708	Distal Intergenic	5	137541563	137549032	7470	2	8697	uc003lcm.1	-18513	ENSG00000094880	CDC23	cell division cycle 23
chr12	9804617	9805231	615	*	0.519026192	0.001159792	0.02622854	Intron (uc031qfy.1/374443, intron 1 of 4)	12	9800698	9811010	10313	1	374443	uc009zgr.2	3919	ENSG00000256594	LOC374443	C-type lectin domain family 2 member D pseudogene
chr1	38988998	38989559	562	*	0.519013703	0.000880459	0.022603851	Distal Intergenic	1	38674706	38680439	5734	2	339442	uc021olp.1	-308559	ENSG00000237290	LINC01343	long intergenic non-protein coding RNA 1343
chr3	132178305	132179160	856	*	0.518951497	0.000319002	0.013122304	Exon (uc010htq.2/23317, exon 14 of 20)	3	132175079	132177193	2115	1	23317	uc003eos.1	3226	ENSG00000138246	DNAJC13	DnaJ heat shock protein family (Hsp40) member C13
chr12	76356575	76356945	371	*	0.518888022	0.00129066	0.027709124	Distal Intergenic	12	76419227	76425556	6330	2	22822	uc001sxu.3	68611	ENSG00000139289	PHLDA1	pleckstrin homology like domain family A member 1
chr2	89218275	89218877	603	*	0.51888594	0.000237727	0.011167362	Intron (uc021vku.1/uc021vku.1, intron 2 of 5)	2	89111884	89111968	85	1	100616399	uc021vks.1	106391	ENSG00000265510	MIR4436A	microRNA 4436a
chr8	134436215	134437146	932	*	0.518843128	0.000114328	0.007879614	Distal Intergenic	8	134249414	134309547	60134	2	10397	uc011lji.1	-126668	ENSG00000104419	NDRG1	N-myc downstream regulated 1
chr10	91036756	91037359	604	*	0.518668563	0.000147332	0.00889922	Intron (uc001kgb.4/3988, intron 2 of 8)	10	91061706	91069033	7328	1	3433	uc009xts.3	-24347	ENSG00000119922	IFIT2	interferon induced protein with tetratricopeptide repeats 2
chr4	85896370	85896749	380	*	0.518663606	0.004566694	0.055805552	Intron (uc003hpg.2/404201, intron 2 of 5)	4	85887971	85928168	40198	1	404201	uc003hph.2	8399	ENSG00000180769	WDFY3-AS2	WDFY3 antisense RNA 2
chr16	71589680	71590319	640	*	0.518598063	0.002410525	0.039153143	Distal Intergenic	16	71600754	71610998	10245	2	6898	uc002fap.2	20679	ENSG00000198650	TAT	tyrosine aminotransferase
chr13	33262336	33262972	637	*	0.518558484	0.002122346	0.036468308	3' UTR	13	33249971	33265405	15435	1	23047	uc010teb.2	12365	ENSG00000083642	PDS5B	PDS5 cohesin associated factor B
chr3	33587401	33588078	678	*	0.518267887	0.001152742	0.026137979	Intron (uc003cfs.3/23122, intron 7 of 15)	3	33537739	33617767	80029	2	23122	uc003cfs.3	29689	ENSG00000163539	CLASP2	cytoplasmic linker associated protein 2
chr13	25973380	25974195	816	*	0.518140361	0.003696827	0.049641218	Intron (uc001uqk.3/51761, intron 1 of 36)	13	25946209	26595420	649212	1	51761	uc001uqk.3	27171	ENSG00000132932	ATP8A2	ATPase phospholipid transporting 8A2
chr9	3262483	3263215	733	*	0.518124952	0.000601829	0.018362085	Exon (uc003zhr.3/5991, exon 14 of 18)	9	3270929	3489428	218500	2	5991	uc003zht.1	226213	ENSG00000080298	RFX3	regulatory factor X3
chr12	111149756	111150374	619	*	0.517974022	0.000460382	0.016019465	Distal Intergenic	12	111086491	111127617	41127	2	84329	uc010syd.1	-22139	ENSG00000122986	HVCN1	hydrogen voltage gated channel 1
chr3	150548507	150549033	527	*	0.517855792	0.00059592	0.018261355	Distal Intergenic	3	150570271	150797617	227347	1	116933	uc011bny.1	-21238	NA	CLRN1-AS1	CLRN1 antisense RNA 1
chr10	115924993	115925659	667	*	0.517772434	4.10E-05	0.004602705	Intron (uc001lbb.1/55088, intron 1 of 15)	10	115933864	115933938	75	2	100302224	uc021pyt.1	8279	ENSG00000284442	MIR2110	microRNA 2110
chr4	26251379	26252008	630	*	0.517733731	0.001230463	0.027096963	Distal Intergenic	4	26321332	26436752	115421	1	3516	uc003grx.2	-69324	ENSG00000168214	RBPJ	recombination signal binding protein for immunoglobulin kappa J region
chr6	154488873	154489491	619	*	0.517648037	0.000136978	0.008585253	Exon (uc003qpv.3/26034, exon 3 of 4)	6	154475618	154534464	58847	2	26034	uc003qpv.3	44973	ENSG00000074706	IPCEF1	interaction protein for cytohesin exchange factors 1
chr9	117690183	117690806	624	*	0.517569685	0.001184739	0.026539892	Promoter (2-3kb)	9	117655623	117692875	37253	2	944	uc022bmi.1	2069	ENSG00000106952	TNFSF8	TNF superfamily member 8
chr5	127391234	127391556	323	*	0.517557539	0.003924757	0.051474883	Intron (uc003kun.3/644873, intron 2 of 3)	5	127276132	127418766	142635	2	644873	uc003kun.3	27210	ENSG00000245937	LINC01184	long intergenic non-protein coding RNA 1184
chr3	156318408	156319001	594	*	0.517390432	0.000151845	0.009026958	Distal Intergenic	3	156257929	156272973	15045	2	6747	uc011bop.2	-45435	ENSG00000114850	SSR3	signal sequence receptor subunit 3
chr5	35544360	35545150	791	*	0.517318236	0.001868647	0.033859151	Distal Intergenic	5	35617989	35671676	53688	1	79925	uc003jjn.1	-72839	ENSG00000152582	SPEF2	sperm flagellar 2
chr3	12178554	12178973	420	*	0.517279985	8.32E-05	0.006673066	Intron (uc003bwl.1/6854, intron 4 of 13)	3	12190057	12233532	43476	1	6854	uc003bwn.3	-11084	ENSG00000157152	SYN2	synapsin II
chr1	198878232	198878729	498	*	0.517275475	0.000183977	0.009856516	Intron (uc021pgz.1/100131234, intron 1 of 2)	1	198777132	198906558	129427	2	100131234	uc021pgz.1	27829	NA	MIR181A1HG	MIR181A1 host gene
chr15	83420383	83420917	535	*	0.517266692	0.002694804	0.04166108	Distal Intergenic	15	83424697	83424823	127	1	677778	uc002bjc.3	-3780	ENSG00000277864	SCARNA15	small Cajal body-specific RNA 15
chr6	82687930	82688291	362	*	0.517245908	0.00163879	0.031316877	Distal Intergenic	6	82455447	82462428	6982	2	55603	uc003pjg.3	-225502	ENSG00000112773	TENT5A	terminal nucleotidyltransferase 5A
chr11	104556988	104557826	839	*	0.517188868	0.000202965	0.010343498	Distal Intergenic	11	104756445	104769397	12953	2	100506742	uc031qdo.1	211571	ENSG00000204403	CASP12	caspase 12 (gene/pseudogene)
chr5	66039959	66040390	432	*	0.517101349	1.57E-05	0.002701446	Intron (uc003jur.4/375449, intron 1 of 5)	5	66124604	66410875	286272	1	375449	uc003jus.3	-84214	ENSG00000069020	MAST4	microtubule associated serine/threonine kinase family member 4
chr15	49595212	49595720	509	*	0.517068424	2.87E-05	0.00382651	Intron (uc001zxi.1/2585, intron 8 of 9)	15	49715375	49779523	64149	1	2252	uc001zxn.3	-119655	ENSG00000140285	FGF7	fibroblast growth factor 7
chr5	93444309	93444943	635	*	0.516969022	0.000808458	0.021564307	Promoter (2-3kb)	5	92953431	93447404	493974	2	83989	uc010jbd.3	2461	ENSG00000113391	FAM172A	family with sequence similarity 172 member A
chr19	19114955	19115618	664	*	0.516954597	3.20E-06	0.00121829	Exon (uc002nkx.2/10147, exon 7 of 11)	19	19105175	19141891	36717	2	10147	uc010xqk.1	26273	ENSG00000064607	SUGP2	SURP and G-patch domain containing 2
chr16	10809833	10810315	483	*	0.516919737	0.00217676	0.036969441	Distal Intergenic	16	10721361	10788802	67442	2	146279	uc002czz.1	-21031	ENSG00000153060	TEKT5	tektin 5
chr9	7654129	7654882	754	*	0.516857838	2.87E-05	0.00382651	Distal Intergenic	9	7796491	7799767	3277	2	90871	uc022bdi.1	144885	ENSG00000137038	DMAC1	distal membrane arm assembly complex 1
chr3	188260434	188261052	619	*	0.51665068	3.07E-05	0.00396933	Intron (uc011bsg.2/4026, intron 4 of 9)	3	188286786	188608460	321675	1	4026	uc011bsj.2	-25734	ENSG00000145012	LPP	LIM domain containing preferred translocation partner in lipoma
chr1	231562086	231562871	786	*	0.516603662	0.000216088	0.010681416	Promoter (1-2kb)	1	231499497	231560790	61294	2	54583	uc001huv.2	-1296	ENSG00000135766	EGLN1	egl-9 family hypoxia inducible factor 1
chr22	19309553	19310536	984	*	0.516558943	0.000297614	0.012669067	Distal Intergenic	22	19168244	19279239	110996	2	8218	uc011agw.1	-30314	ENSG00000070371	CLTCL1	clathrin heavy chain like 1
chr10	96368285	96369189	905	*	0.516465647	0.000225604	0.010889785	Distal Intergenic	10	96305574	96361856	56283	1	3070	uc009xur.3	62711	ENSG00000119969	HELLS	helicase, lymphoid specific
chr10	90685478	90685977	500	*	0.516381485	0.005792959	0.063644073	Intron (uc010qmx.2/57559, intron 10 of 10)	10	90672113	90683259	11147	1	57559	uc001kfn.4	13365	ENSG00000138134	STAMBPL1	STAM binding protein like 1
chr2	23731211	23731643	433	*	0.516275204	8.87E-05	0.006875246	Intron (uc010ykg.2/114818, intron 2 of 13)	2	23755455	23867144	111690	1	114818	uc002ref.3	-23812	ENSG00000119771	KLHL29	kelch like family member 29
chr6	158135888	158136336	449	*	0.516216784	0.000437142	0.015565849	Distal Intergenic	6	158066769	158094977	28209	1	79683	uc010kjn.3	69119	ENSG00000175048	ZDHHC14	zinc finger DHHC-type containing 14
chr1	221196829	221197243	415	*	0.516201361	4.51E-05	0.00485627	Distal Intergenic	1	221052743	221058400	5658	1	3142	uc001hmv.4	144086	ENSG00000136630	HLX	H2.0 like homeobox
chr3	151542370	151542769	400	*	0.516196611	0.001574579	0.030631037	Exon (uc021xgb.1/100313773, exon 2 of 2)	3	151531861	151546276	14416	1	13	uc003eze.3	10509	ENSG00000114771	AADAC	arylacetamide deacetylase
chr5	107657501	107658413	913	*	0.516170153	0.000182652	0.009847211	Intron (uc011cvc.2/64839, intron 4 of 8)	5	107213952	107703654	489703	2	64839	uc003kon.4	45241	ENSG00000145743	FBXL17	F-box and leucine rich repeat protein 17
chr12	10188068	10188554	487	*	0.516166104	3.11E-05	0.004005134	Intron (uc001qxa.3/283420, intron 1 of 8)	12	10183276	10218565	35290	1	283420	uc001qxa.3	4792	ENSG00000197992	CLEC9A	C-type lectin domain containing 9A
chr5	114192733	114193698	966	*	0.516075005	0.003200802	0.045806129	Distal Intergenic	5	114460459	114505658	45200	2	55521	uc011cwc.2	311960	ENSG00000152503	TRIM36	tripartite motif containing 36
chr3	197259675	197260607	933	*	0.516054377	0.000119586	0.008053204	Exon (uc003fxr.3/622, exon 4 of 8)	3	197236654	197282858	46205	2	622	uc003fxr.3	22251	ENSG00000161267	BDH1	3-hydroxybutyrate dehydrogenase 1
chr6	151873345	151873790	446	*	0.515935451	0.004954052	0.058272363	Intron (uc003qol.3/80129, intron 5 of 10)	6	151815175	151942328	127154	1	80129	uc003qol.3	58170	ENSG00000120262	CCDC170	coiled-coil domain containing 170
chr1	234292969	234293800	832	*	0.515886328	0.002860819	0.042986314	Intron (uc001hvy.1/148641, intron 2 of 7)	1	234350017	234460262	110246	1	148641	uc001hwa.1	-56217	ENSG00000183780	SLC35F3	solute carrier family 35 member F3
chr9	104168052	104168823	772	*	0.515788244	0.000264536	0.011867794	5' UTR	9	104161136	104172942	11807	1	7743	uc031teq.1	6916	ENSG00000136870	ZNF189	zinc finger protein 189
chr21	38886425	38886937	513	*	0.515779379	1.09E-06	0.000693708	3' UTR	21	38861087	38887679	26593	1	1859	uc011aei.2	25338	ENSG00000157540	DYRK1A	dual specificity tyrosine phosphorylation regulated kinase 1A
chr12	65657117	65657896	780	*	0.515642866	4.31E-05	0.004721151	Distal Intergenic	12	65672423	65860687	188265	1	253827	uc001ssm.3	-14527	ENSG00000174099	MSRB3	methionine sulfoxide reductase B3
chr10	104984764	104985471	708	*	0.515632189	0.000298836	0.012678519	Intron (uc001kwr.3/uc001kwr.3, intron 1 of 1)	10	105005644	105007773	2130	1	729020	uc009xxi.2	-20173	ENSG00000235376	RPEL1	ribulose-5-phosphate-3-epimerase like 1
chr15	57561464	57562101	638	*	0.515554237	7.35E-05	0.006316376	Intron (uc010ugm.1/6938, intron 17 of 18)	15	57544397	57565420	21024	1	6938	uc010ugr.1	17067	ENSG00000140262	TCF12	transcription factor 12
chr15	35181732	35182162	431	*	0.515534925	0.006112818	0.065647893	Intron (uc001ziv.3/9716, intron 24 of 34)	15	35148552	35261995	113444	2	9716	uc001ziv.3	79833	ENSG00000021776	AQR	aquarius intron-binding spliceosomal factor
chr4	3211671	3212442	772	*	0.51549438	0.000135311	0.008547418	Exon (uc021xkv.1/3064, exon 47 of 67)	4	3250767	3258342	7576	1	345222	uc003ggs.3	-38325	ENSG00000188981	MSANTD1	Myb/SANT DNA binding domain containing 1
chr10	69963373	69964274	902	*	0.515491092	0.000353084	0.013788757	Intron (uc001jnm.5/84665, intron 19 of 20)	10	69990352	69991870	1519	2	220202	uc001jnq.3	27596	ENSG00000179774	ATOH7	atonal bHLH transcription factor 7
chr2	99393510	99393980	471	*	0.515439836	0.001192705	0.026658609	Distal Intergenic	2	99235569	99347589	112021	2	11320	uc010fil.3	-45921	ENSG00000071073	MGAT4A	alpha-1,3-mannosyl-glycoprotein 4-beta-N-acetylglucosaminyltransferase A
chr3	57221035	57221715	681	*	0.515435049	0.000451832	0.015849006	Distal Intergenic	3	57231944	57234280	2337	2	8820	uc003din.4	12565	ENSG00000163666	HESX1	HESX homeobox 1
chr2	55630296	55631251	956	*	0.515396936	1.19E-06	0.000733808	Exon (uc010fbz.3/55704, exon 3 of 3)	2	55514978	55647057	132080	2	55704	uc002ryv.2	15806	ENSG00000115355	CCDC88A	coiled-coil domain containing 88A
chr1	221405083	221405592	510	*	0.515371076	0.004574851	0.055836839	Distal Intergenic	1	221503270	221509638	6369	2	400804	uc001hmw.1	104046	ENSG00000234754	LINC02817	long intergenic non-protein coding RNA 2817
chr19	40590555	40590999	445	*	0.515328207	0.001035875	0.024633984	5' UTR	19	40578899	40596810	17912	2	284323	uc002omy.3	5811	ENSG00000197782	ZNF780A	zinc finger protein 780A
chr5	147757939	147758663	725	*	0.515284673	0.000107309	0.007599687	Exon (uc003lpb.1/uc003lpb.1, exon 2 of 5)	5	147763498	147822399	58902	1	81545	uc003lpg.2	-4835	ENSG00000145868	FBXO38	F-box protein 38
chr16	68047708	68048383	676	*	0.515261321	0.000179646	0.009752179	Distal Intergenic	16	68056847	68113226	56380	1	54920	uc002evi.4	-8464	ENSG00000167264	DUS2	dihydrouridine synthase 2
chr14	25100584	25101420	837	*	0.515251241	0.00497278	0.058400774	Promoter (2-3kb)	14	25100161	25103432	3272	2	3002	uc001wps.2	2012	ENSG00000100453	GZMB	granzyme B
chr17	72499976	72500545	570	*	0.515049054	0.0021238	0.036473298	Distal Intergenic	17	72517313	72527613	10301	2	124599	uc002jkx.2	27068	ENSG00000178789	CD300LB	CD300 molecule like family member b
chr6	11509608	11510339	732	*	0.515030837	0.002922442	0.043481669	Intron (uc003mzz.1/uc003mzz.1, intron 4 of 4)	6	11538460	11583757	45298	1	100113407	uc010jpa.4	-28121	ENSG00000205269	TMEM170B	transmembrane protein 170B
chr9	108238359	108239108	750	*	0.514993724	0.000329261	0.013345928	Intron (uc004bcq.2/83856, intron 4 of 12)	9	108210315	108311385	101071	1	83856	uc011lvw.1	28044	ENSG00000106701	FSD1L	fibronectin type III and SPRY domain containing 1 like
chr5	80142359	80143098	740	*	0.514993059	0.000390291	0.014649515	Intron (uc003kgz.4/4437, intron 20 of 23)	5	80256508	80525981	269474	1	5924	uc003kha.2	-113410	ENSG00000113319	RASGRF2	Ras protein specific guanine nucleotide releasing factor 2
chr12	2080081	2080780	700	*	0.514790508	0.000209032	0.010468097	Exon (uc001qjy.3/uc001qjy.3, exon 1 of 1)	12	2050757	2113677	62921	2	196513	uc010sdy.1	32897	ENSG00000151065	DCP1B	decapping mRNA 1B
chr9	114439534	114439935	402	*	0.514664278	0.000236233	0.011134317	Distal Intergenic	9	114423851	114432526	8676	1	2790	uc011lws.2	15683	ENSG00000242616	GNG10	G protein subunit gamma 10
chr1	231698555	231699134	580	*	0.514612041	0.000356006	0.013845376	Intron (uc001huw.3/7257, intron 5 of 5)	1	231664399	231702269	37871	1	7257	uc001huw.3	34156	ENSG00000116918	TSNAX	translin associated factor X
chr1	157062778	157063615	838	*	0.514599073	2.17E-05	0.0032692	Exon (uc001fqq.2/440695, exon 5 of 5)	1	157061835	157069600	7766	2	440695	uc001fqq.2	5985	ENSG00000253831	ETV3L	ETS variant transcription factor 3 like
chr2	149512844	149513487	644	*	0.514529951	0.005402763	0.061215913	Intron (uc010zbt.2/26122, intron 4 of 13)	2	149402560	149545136	142577	1	26122	uc010zbt.2	110284	ENSG00000135999	EPC2	enhancer of polycomb homolog 2
chr11	59529397	59530105	709	*	0.514477182	1.79E-05	0.002956913	Intron (uc001nog.3/6809, intron 1 of 10)	11	59522532	59573355	50824	1	6809	uc010rky.2	6865	ENSG00000166900	STX3	syntaxin 3
chr16	72808037	72808599	563	*	0.514353819	0.00018343	0.009850154	Intron (uc002fcj.1/uc002fcj.1, intron 4 of 6)	16	72816786	73082274	265489	2	463	uc002fck.3	273675	ENSG00000140836	ZFHX3	zinc finger homeobox 3
chr17	59378498	59379071	574	*	0.514286027	0.000243907	0.011298759	Intron (uc002iyu.4/54828, intron 22 of 23)	17	59322577	59470199	147623	1	54828	uc002izc.4	55921	ENSG00000141376	BCAS3	BCAS3 microtubule associated cell migration factor
chr2	128070738	128071481	744	*	0.514085783	1.76E-06	0.000884038	Intron (uc002toj.2/10746, intron 14 of 15)	2	128047272	128051752	4481	2	2071	uc010fly.3	-18986	ENSG00000163161	ERCC3	ERCC excision repair 3, TFIIH core complex helicase subunit
chr15	51950568	51951327	760	*	0.514032734	2.29E-05	0.003381391	Distal Intergenic	15	51973550	52013223	39674	1	29106	uc002abh.3	-22223	ENSG00000104112	SCG3	secretogranin III
chr13	77234790	77235190	401	*	0.513997806	0.007865585	0.075885865	Distal Intergenic	13	77454304	77460540	6237	2	115207	uc010aeu.1	225350	ENSG00000178695	KCTD12	potassium channel tetramerization domain containing 12
chr7	63962249	63962842	594	*	0.513976411	0.000108214	0.007631517	Distal Intergenic	7	63980255	64023505	43251	2	340252	uc003tta.2	60663	ENSG00000173041	ZNF680	zinc finger protein 680
chr5	65033441	65034002	562	*	0.513842578	0.002448274	0.039495013	Intron (uc003jue.3/57486, intron 1 of 8)	5	65018023	65125111	107089	1	57486	uc003juf.3	15418	ENSG00000123213	NLN	neurolysin
chr1	94753282	94753926	645	*	0.513840516	0.00037039	0.014199337	Distal Intergenic	1	94615403	94740624	125222	2	9411	uc009wdq.1	-12658	ENSG00000137962	ARHGAP29	Rho GTPase activating protein 29
chr8	96412230	96413182	953	*	0.51381956	0.000751933	0.020678041	Intron (uc022ayl.1/100616530, intron 2 of 5)	8	96257141	96281462	24322	2	157657	uc003yho.2	-130768	ENSG00000156172	C8orf37	chromosome 8 open reading frame 37
chr8	142269796	142270356	561	*	0.51380208	0.000687503	0.019785323	Distal Intergenic	8	142220870	142264225	43356	2	57210	uc010meq.1	-5571	ENSG00000022567	SLC45A4	solute carrier family 45 member 4
chr16	53990981	53991523	543	*	0.513660292	0.000490706	0.016638786	Intron (uc002ehr.3/79068, intron 8 of 8)	16	53967897	54148379	180483	1	79068	uc002ehs.3	23084	ENSG00000140718	FTO	FTO alpha-ketoglutarate dependent dioxygenase
chr1	221322511	221323053	543	*	0.513538231	0.00038081	0.014453982	Distal Intergenic	1	221503270	221509638	6369	2	400804	uc001hmw.1	186585	ENSG00000234754	LINC02817	long intergenic non-protein coding RNA 2817
chr2	239200702	239201280	579	*	0.513353527	0.000740322	0.02053885	Promoter (1-2kb)	2	239170183	239198743	28561	2	8864	uc010znw.1	-1959	ENSG00000132326	PER2	period circadian regulator 2
chr8	65726183	65726920	738	*	0.513321103	0.00042498	0.015330081	Distal Intergenic	8	65508529	65711348	202820	2	9420	uc003xvj.2	-14835	ENSG00000172817	CYP7B1	cytochrome P450 family 7 subfamily B member 1
chr5	134490582	134490992	411	*	0.513232194	0.004314502	0.05417717	Intron (uc003laj.2/100996485, intron 2 of 5)	5	134571924	134583867	11944	2	340073	uc003lak.3	92875	ENSG00000249647	C5orf66-AS2	C5orf66 antisense RNA 2
chr6	125296264	125296855	592	*	0.51310083	4.24E-05	0.004675406	Intron (uc003pzr.3/154214, intron 1 of 5)	6	125304514	125404661	100148	1	154214	uc003pzs.3	-7659	ENSG00000146373	RNF217	ring finger protein 217
chr21	35163267	35164074	808	*	0.513047108	0.006942208	0.070582745	Intron (uc002ysw.3/6453, intron 16 of 29)	21	35174734	35189918	15185	1	6453	uc002ytf.1	-10660	ENSG00000205726	ITSN1	intersectin 1
chr3	27527672	27528303	632	*	0.513010621	0.000229588	0.010963956	Promoter (1-2kb)	3	27465132	27525911	60780	2	9497	uc010hfm.3	-1761	ENSG00000033867	SLC4A7	solute carrier family 4 member 7
chr4	84062144	84062667	524	*	0.512832826	0.000358846	0.013904115	Distal Intergenic	4	84015307	84035911	20605	2	51316	uc003hod.2	-26233	ENSG00000145287	PLAC8	placenta associated 8
chr1	197062621	197063073	453	*	0.512764352	0.001167556	0.026323937	Intron (uc001gtu.3/259266, intron 20 of 27)	1	197008321	197036397	28077	2	2165	uc001gtt.1	-26224	ENSG00000143278	F13B	coagulation factor XIII B chain
chr5	64073736	64074286	551	*	0.512713429	0.001497825	0.029736636	Intron (uc003jtl.3/10283, intron 2 of 10)	5	64064755	64314590	249836	1	10283	uc010iwt.1	8981	ENSG00000153015	CWC27	CWC27 spliceosome associated cyclophilin
chr1	206113946	206114670	725	*	0.51269991	0.000380027	0.014448292	Distal Intergenic	1	206138911	206155074	16164	1	729533	uc001hdr.4	-24241	ENSG00000196550	FAM72A	family with sequence similarity 72 member A
chr16	48221442	48222178	737	*	0.512601598	0.000217078	0.010692189	Promoter (<=1kb)	16	48200822	48221338	20517	2	85320	uc010cbg.1	-104	ENSG00000121270	ABCC11	ATP binding cassette subfamily C member 11
chr3	48164656	48165301	646	*	0.512537592	0.000283759	0.01234744	Distal Intergenic	3	48014569	48130769	116201	2	4134	uc003csg.3	-33887	ENSG00000047849	MAP4	microtubule associated protein 4
chr10	45411038	45411693	656	*	0.512447044	0.000309474	0.012905313	Intron (uc001jbn.2/643236, intron 1 of 4)	10	45406764	45430642	23879	1	643236	uc009xmm.1	4274	ENSG00000187783	TMEM72	transmembrane protein 72
chr2	226899790	226900688	899	*	0.512423744	0.002066734	0.035919471	Distal Intergenic	2	227007510	227044778	37269	1	646736	uc002vog.1	-106822	NA	LOC646736	uncharacterized LOC646736
chr5	139701385	139702041	657	*	0.512354156	0.001325456	0.028058255	Distal Intergenic	5	139624635	139682689	58055	2	5201	uc003lff.1	-18696	ENSG00000113068	PFDN1	prefoldin subunit 1
chr8	97943868	97944524	657	*	0.512273705	0.000934325	0.023352405	Intron (uc003yhw.3/10404, intron 4 of 7)	8	97797092	97978571	181480	1	10404	uc010mbe.2	146776	ENSG00000104324	CPQ	carboxypeptidase Q
chr9	486167	486550	384	*	0.512223195	0.005798112	0.063670943	Intron (uc003zgl.2/23189, intron 3 of 15)	9	470294	746106	275813	1	23189	uc003zgl.2	15873	ENSG00000107104	KANK1	KN motif and ankyrin repeat domains 1
chr1	95211898	95212431	534	*	0.512111692	0.000920273	0.023148809	Intron (uc001dqu.3/uc001dqu.3, intron 1 of 4)	1	95285898	95360803	74906	1	126969	uc001dqv.5	-73467	ENSG00000143036	SLC44A3	solute carrier family 44 member 3
chr5	131930481	131930867	387	*	0.511778179	0.000346234	0.013651564	Exon (uc003kxh.3/10111, exon 12 of 25)	5	131892616	131980313	87698	1	10111	uc003kxi.3	37865	ENSG00000113522	RAD50	RAD50 double strand break repair protein
chr19	42269949	42270493	545	*	0.511404996	0.000355613	0.013841559	3' UTR	19	42259398	42276113	16716	1	4680	uc002orm.2	10551	ENSG00000086548	CEACAM6	CEA cell adhesion molecule 6
chr19	44197591	44198203	613	*	0.511396738	0.000381644	0.014471567	Distal Intergenic	19	44220214	44224169	3956	1	56269	uc002oxh.3	-22011	ENSG00000124449	IRGC	immunity related GTPase cinema
chr1	55525538	55526051	514	*	0.511314182	0.004185057	0.053327587	Intron (uc001cyf.2/255738, intron 10 of 11)	1	55505895	55530526	24632	1	255738	uc010oom.2	19643	ENSG00000169174	PCSK9	proprotein convertase subtilisin/kexin type 9
chr5	126007043	126007727	685	*	0.511075473	0.000576933	0.018045515	Distal Intergenic	5	125967414	125971974	4561	1	389320	uc003kub.1	39629	ENSG00000196900	TEX43	testis expressed 43
chr5	52214834	52215445	612	*	0.510948436	2.52E-05	0.003578566	Intron (uc003jou.3/3672, intron 16 of 28)	5	52197609	52249485	51877	1	3672	uc003jow.3	17225	ENSG00000213949	ITGA1	integrin subunit alpha 1
chr16	58520712	58521601	890	*	0.510805888	0.000131396	0.008460893	Intron (uc002enk.3/65009, intron 1 of 15)	16	58534047	58547523	13477	1	65009	uc002eno.3	-12446	ENSG00000103034	NDRG4	NDRG family member 4
chr19	44996311	44996686	376	*	0.510793343	0.00528338	0.060372222	Intron (uc002ozh.4/7733, intron 3 of 6)	19	44979859	45004572	24714	2	7733	uc002ozh.4	7886	ENSG00000167384	ZNF180	zinc finger protein 180
chr6	108386972	108387651	680	*	0.510778867	0.000128425	0.008407519	Intron (uc003psd.3/28962, intron 1 of 5)	6	108362613	108395941	33329	2	28962	uc003psd.3	8290	ENSG00000081087	OSTM1	osteoclastogenesis associated transmembrane protein 1
chr17	66330379	66330944	566	*	0.510704321	0.000673077	0.019610127	Intron (uc002jhc.2/22901, intron 2 of 11)	17	66287636	66417000	129365	1	22901	uc031ree.1	42743	ENSG00000141337	ARSG	arylsulfatase G
chr1	9131513	9132032	520	*	0.510619217	0.0001573	0.009191519	Promoter (1-2kb)	1	9101427	9129887	28461	2	6518	uc001app.4	-1626	ENSG00000142583	SLC2A5	solute carrier family 2 member 5
chr2	95781494	95782017	524	*	0.510562401	0.00127701	0.027554424	Intron (uc002sub.3/64969, intron 2 of 11)	2	95752952	95787754	34803	2	64969	uc002sub.3	5737	ENSG00000144029	MRPS5	mitochondrial ribosomal protein S5
chr7	75784900	75785476	577	*	0.509930543	0.002412544	0.039172396	Distal Intergenic	7	75831216	75916605	85390	1	222183	uc010ldi.2	-45740	ENSG00000177679	SRRM3	serine/arginine repetitive matrix 3
chr3	141849174	141849822	649	*	0.509866999	0.000638864	0.018943218	Intron (uc003eum.4/7029, intron 1 of 13)	3	141663270	141868386	205117	2	7029	uc003eum.4	18564	ENSG00000114126	TFDP2	transcription factor Dp-2
chr8	48431027	48431632	606	*	0.509757725	0.000227851	0.010937063	Intron (uc011lcz.2/23514, intron 7 of 7)	8	48352885	48648563	295679	1	23514	uc010lxt.3	78142	ENSG00000164808	SPIDR	scaffold protein involved in DNA repair
chr6	88973560	88974291	732	*	0.50974903	0.000730383	0.020389403	Distal Intergenic	6	88849585	88875767	26183	2	1268	uc011dzt.2	-97793	ENSG00000118432	CNR1	cannabinoid receptor 1
chr1	180971488	180972061	574	*	0.509519983	0.000378349	0.014422176	Exon (uc021pfr.1/10228, exon 3 of 8)	1	180942176	180992046	49871	2	10228	uc010pnr.2	19985	ENSG00000135823	STX6	syntaxin 6
chr10	26606021	26606524	504	*	0.509417256	0.004535675	0.055639936	Distal Intergenic	10	26505236	26593491	88256	1	2572	uc001isq.2	100785	ENSG00000136750	GAD2	glutamate decarboxylase 2
chr1	180370250	180371117	868	*	0.509331086	0.000232828	0.011057235	Intron (uc001gog.3/84320, intron 5 of 7)	1	180407449	180407525	77	2	100423032	uc021pfq.1	36408	ENSG00000265435	MIR3121	microRNA 3121
chr1	33791705	33792396	692	*	0.509327169	6.63E-05	0.005996598	Intron (uc001bxe.1/1912, intron 6 of 6)	1	33772367	33786699	14333	2	127550	uc031plq.1	-5006	ENSG00000184389	A3GALT2	alpha 1,3-galactosyltransferase 2
chr6	145097330	145098113	784	*	0.509266769	0.000495876	0.016720604	Intron (uc003qkt.3/7402, intron 59 of 73)	6	144612873	145174170	561298	1	7402	uc003qkt.3	484457	ENSG00000152818	UTRN	utrophin
chr8	134376779	134377488	710	*	0.509177306	0.000858788	0.022321223	Distal Intergenic	8	134249414	134309547	60134	2	10397	uc011lji.1	-67232	ENSG00000104419	NDRG1	N-myc downstream regulated 1
chr18	53928383	53928867	485	*	0.509106437	0.000284261	0.012352172	Distal Intergenic	18	53750587	53804767	54181	2	100505474	uc010dpj.1	-123616	ENSG00000267712	LINC01539	long intergenic non-protein coding RNA 1539
chr1	91470937	91471477	541	*	0.508951512	0.004618961	0.056149119	Intron (uc001dnv.3/84146, intron 1 of 3)	1	91380857	91487065	106209	2	84146	uc001dnv.3	15588	ENSG00000122482	ZNF644	zinc finger protein 644
chr7	65937393	65938170	778	*	0.508916997	0.000270454	0.012001655	Distal Intergenic	7	65841031	65865395	24365	2	285908	uc003tux.4	-71998	ENSG00000179406	LINC00174	long intergenic non-protein coding RNA 174
chr17	53769841	53770775	935	*	0.508829728	0.000451664	0.015849002	Distal Intergenic	17	53796988	53800225	3238	2	55273	uc002iuj.4	29450	ENSG00000166292	TMEM100	transmembrane protein 100
chr8	129298824	129299202	379	*	0.50879956	0.003430627	0.047572561	Distal Intergenic	8	129162362	129162434	73	1	100302281	uc022bbk.1	136462	ENSG00000221261	MIR1208	microRNA 1208
chr12	24392265	24393202	938	*	0.508635006	0.001357377	0.028326422	Intron (uc001rfx.4/6660, intron 4 of 17)	12	24365355	24365429	75	1	100126320	uc021qwc.1	26910	ENSG00000216192	MIR920	microRNA 920
chr2	62259319	62259720	402	*	0.508553211	0.000134697	0.008527517	Intron (uc002sbp.3/150684, intron 2 of 2)	2	62132803	62363205	230403	1	150684	uc002sbp.3	126516	ENSG00000173163	COMMD1	copper metabolism domain containing 1
chr16	85794784	85795454	671	*	0.508493964	3.16E-05	0.004030931	Distal Intergenic	16	85741124	85784689	43566	2	404550	uc002fjc.4	-10095	ENSG00000154102	C16orf74	chromosome 16 open reading frame 74
chr5	59049866	59050599	734	*	0.508437404	0.003948386	0.051612098	Intron (uc003jry.3/5144, intron 1 of 15)	5	58264866	59064438	799573	2	5144	uc003jry.3	13839	ENSG00000113448	PDE4D	phosphodiesterase 4D
chr7	90192391	90192824	434	*	0.508378571	0.007782034	0.075407995	Promoter (<=1kb)	7	90193049	90419967	226919	1	5218	uc003uku.1	-225	ENSG00000058091	CDK14	cyclin dependent kinase 14
chr11	15241125	15242008	884	*	0.508346456	0.001204846	0.02675089	Intron (uc001mly.4/387755, intron 7 of 12)	11	15170648	15268756	98109	1	387755	uc010rcs.3	70477	ENSG00000188487	INSC	INSC spindle orientation adaptor protein
chr12	83112779	83113778	1000	*	0.508269128	0.00045378	0.015879556	Intron (uc001szr.1/160335, intron 1 of 5)	12	83080934	83528067	447134	1	160335	uc010suk.2	31845	ENSG00000179104	TMTC2	transmembrane O-mannosyltransferase targeting cadherins 2
chr13	26907060	26907635	576	*	0.508207527	7.89E-05	0.006530862	Intron (uc001uqr.1/1024, intron 1 of 12)	13	26828756	26978569	149814	1	1024	uc001uqt.1	78304	ENSG00000132964	CDK8	cyclin dependent kinase 8
chr15	50158569	50158945	377	*	0.508178422	0.000513013	0.017035896	Exon (uc001zxt.3/79895, exon 2 of 4)	15	50150435	50168727	18293	2	79895	uc001zxt.3	9782	ENSG00000104043	ATP8B4	ATPase phospholipid transporting 8B4 (putative)
chr1	8145451	8145929	479	*	0.508161177	0.001145927	0.026052536	Distal Intergenic	1	8071779	8086393	14615	2	54206	uc001aoz.3	-59058	ENSG00000116285	ERRFI1	ERBB receptor feedback inhibitor 1
chr11	13658772	13659099	328	*	0.508047972	0.002259287	0.037685627	Distal Intergenic	11	13690206	13734631	44426	1	84188	uc009ygp.3	-31107	ENSG00000197601	FAR1	fatty acyl-CoA reductase 1
chr15	72794858	72795255	398	*	0.508038921	0.000618195	0.018627624	Intron (uc002aut.4/25820, intron 1 of 13)	15	72766667	72878896	112230	1	25820	uc002aut.4	28191	ENSG00000166233	ARIH1	ariadne RBR E3 ubiquitin protein ligase 1
chr5	124339504	124340478	975	*	0.507942146	0.000601064	0.018362085	Distal Intergenic	5	123982372	124084500	102129	2	57507	uc003ktt.1	-255004	ENSG00000168916	ZNF608	zinc finger protein 608
chr4	123199589	123200053	465	*	0.507788128	6.20E-05	0.005780001	Intron (uc003ieh.3/84162, intron 48 of 83)	4	123175960	123246921	70962	1	84162	uc003iel.1	23629	ENSG00000138688	KIAA1109	KIAA1109
chr6	111428316	111428829	514	*	0.507690286	0.000167447	0.009455525	Intron (uc003pur.4/117247, intron 1 of 2)	6	111408781	111544606	135826	1	117247	uc003pus.3	19535	ENSG00000112394	SLC16A10	solute carrier family 16 member 10
chr7	13940343	13940908	566	*	0.507686733	0.003359052	0.046981443	3' UTR	7	13945823	14025145	79323	2	2115	uc010ktv.3	84237	ENSG00000006468	ETV1	ETS variant transcription factor 1
chr17	58875826	58876345	520	*	0.507479286	0.000386767	0.014577684	Intron (uc010wow.1/54828, intron 3 of 10)	17	58964363	59067596	103234	1	54828	uc002iyx.1	-88018	ENSG00000141376	BCAS3	BCAS3 microtubule associated cell migration factor
chr22	37364863	37365574	712	*	0.507472322	0.001145427	0.026052536	Distal Intergenic	22	37361289	37364213	2925	1	100506241	uc021woq.1	3574	ENSG00000215403	LL22NC01-81G9.3	uncharacterized protein FLJ39582-like
chr6	116766162	116766825	664	*	0.507382383	0.000216725	0.010685976	Distal Intergenic	6	116753692	116759442	5751	1	29940	uc003pwu.3	12470	ENSG00000111817	DSE	dermatan sulfate epimerase
chr18	2496838	2497618	781	*	0.507348596	0.000862369	0.022374201	Distal Intergenic	18	2537524	2555037	17514	2	64863	uc010dkj.3	57419	ENSG00000101574	METTL4	methyltransferase like 4
chr1	59146124	59146797	674	*	0.507338167	8.28E-05	0.006673066	Intron (uc001czc.3/114803, intron 5 of 16)	1	59120411	59156089	35679	2	114803	uc001czc.3	9292	ENSG00000162601	MYSM1	Myb like, SWIRM and MPN domains 1
chr2	202580004	202580681	678	*	0.507294517	0.000794669	0.021329559	Exon (uc010ftl.3/57679, exon 17 of 26)	2	202544788	202563417	18630	2	58538	uc002uyn.3	-16587	ENSG00000082126	MPP4	membrane palmitoylated protein 4
chr18	46920687	46921100	414	*	0.507234427	0.007173848	0.071865457	Intron (uc002ldi.1/54808, intron 2 of 16)	18	46644389	46860223	215835	2	54808	uc002ldj.3	-60464	ENSG00000141627	DYM	dymeclin
chr4	139808152	139808723	572	*	0.507115567	0.006683209	0.069008479	Distal Intergenic	4	139936943	139965034	28092	1	25819	uc003ihk.1	-128220	ENSG00000151014	NOCT	nocturnin
chr2	26481696	26482345	650	*	0.506777116	0.00037815	0.014420441	Intron (uc010yku.1/3032, intron 3 of 3)	2	26492806	26513333	20528	1	3032	uc010ykx.2	-10461	ENSG00000138029	HADHB	hydroxyacyl-CoA dehydrogenase trifunctional multienzyme complex subunit beta
chr11	10482866	10483438	573	*	0.506768054	0.000309709	0.012909408	Promoter (<=1kb)	11	10482678	10529126	46449	1	272	uc009yfy.2	188	ENSG00000133805	AMPD3	adenosine monophosphate deaminase 3
chr5	35640359	35641114	756	*	0.506653182	0.001316619	0.027998091	Intron (uc003jjn.1/79925, intron 2 of 9)	5	35617989	35814713	196725	1	79925	uc003jjo.3	22370	ENSG00000152582	SPEF2	sperm flagellar 2
chr3	49346071	49346567	497	*	0.506639808	0.000290621	0.012541628	Intron (uc003cwp.2/7375, intron 2 of 15)	3	49314577	49350296	35720	2	7375	uc003cwp.2	3729	ENSG00000114316	USP4	ubiquitin specific peptidase 4
chr20	21163470	21164283	814	*	0.506569413	0.000254815	0.011575274	Intron (uc002wsb.3/55857, intron 6 of 13)	20	21142512	21227258	84747	1	55857	uc002wsd.3	20958	ENSG00000088970	KIZ	kizuna centrosomal protein
chr1	39296086	39296995	910	*	0.50650928	0.00020105	0.010273872	Distal Intergenic	1	39303869	39325495	21627	2	64121	uc001ccq.3	28500	ENSG00000116954	RRAGC	Ras related GTP binding C
chr11	47651207	47651894	688	*	0.50647036	6.13E-05	0.005742534	Intron (uc010rho.2/23788, intron 8 of 12)	11	47638858	47664206	25349	2	23788	uc010rho.2	12312	ENSG00000109919	MTCH2	mitochondrial carrier 2
chr13	111444453	111444910	458	*	0.506358865	0.00120496	0.02675089	Distal Intergenic	13	111367784	111373421	5638	1	3621	uc031qni.1	76669	ENSG00000153487	ING1	inhibitor of growth family member 1
chr11	73431098	73431538	441	*	0.506292285	0.000371488	0.014224054	Intron (uc021qnd.1/5870, intron 3 of 7)	11	73386683	73471138	84456	2	5870	uc021qnd.1	39600	ENSG00000175582	RAB6A	RAB6A, member RAS oncogene family
chr8	23603152	23603847	696	*	0.506243957	0.001496836	0.029733505	Distal Intergenic	8	23559964	23564111	4148	2	137814	uc011kzy.3	-39041	ENSG00000180053	NKX2-6	NK2 homeobox 6
chr8	135583344	135583728	385	*	0.506164832	0.000348567	0.013693846	Intron (uc003yun.3/57623, intron 11 of 16)	8	135490031	135577914	87884	2	57623	uc011ljj.2	-5430	ENSG00000066827	ZFAT	zinc finger and AT-hook domain containing
chr10	75280852	75281311	460	*	0.506123083	0.001193926	0.026679567	Promoter (2-3kb)	10	75257296	75283508	26213	2	159195	uc010qkk.2	2197	ENSG00000166348	USP54	ubiquitin specific peptidase 54
chr3	61079124	61079595	472	*	0.506109489	0.002153707	0.036783236	Intron (uc003dkx.4/2272, intron 2 of 9)	3	59735036	61237133	1502098	2	2272	uc003dkx.4	157538	ENSG00000189283	FHIT	fragile histidine triad diadenosine triphosphatase
chr6	166801566	166802444	879	*	0.506042668	0.00113953	0.025969848	Distal Intergenic	6	166782325	166796501	14177	2	51660	uc010kkj.2	-5065	ENSG00000060762	MPC1	mitochondrial pyruvate carrier 1
chr14	75580517	75581131	615	*	0.506021	0.001205364	0.02675089	Promoter (2-3kb)	14	75548818	75584029	35212	2	91754	uc001xrk.3	2898	ENSG00000119638	NEK9	NIMA related kinase 9
chr5	170350775	170351601	827	*	0.505945026	0.000194604	0.010070284	Exon (uc003max.2/64901, exon 12 of 18)	5	170288896	170727019	438124	1	64901	uc003mba.3	61879	ENSG00000204764	RANBP17	RAN binding protein 17
chr5	50037297	50037926	630	*	0.505902173	0.000174937	0.009647256	Intron (uc003jon.4/79668, intron 3 of 26)	5	49962772	50142356	179585	1	79668	uc003jop.3	74525	ENSG00000151883	PARP8	poly(ADP-ribose) polymerase family member 8
chr1	145788825	145789171	347	*	0.505813679	0.000634139	0.0188552	Promoter (<=1kb)	1	145764595	145788795	24201	2	653519	uc001eop.2	-30	ENSG00000117262	GPR89A	G protein-coupled receptor 89A
chr8	121905907	121906599	693	*	0.505775331	0.000379747	0.014448292	Distal Intergenic	8	121582500	121824309	241810	2	6641	uc003ype.3	-81598	ENSG00000172164	SNTB1	syntrophin beta 1
chr8	117466362	117467152	791	*	0.505706357	7.23E-06	0.001869871	Distal Intergenic	8	116962736	117337297	374562	2	100859921	uc031tcc.1	-129065	ENSG00000249917	LINC00536	long intergenic non-protein coding RNA 536
chr11	112167982	112168573	592	*	0.505657998	2.94E-06	0.001155572	Distal Intergenic	11	112118876	112131583	12708	2	349633	uc009yyp.2	-36399	ENSG00000188771	PLET1	placenta expressed transcript 1
chr4	76428836	76429432	597	*	0.50563471	0.000303918	0.012769868	Intron (uc003hij.3/25898, intron 3 of 8)	4	76404247	76419641	15395	2	25898	uc010iio.3	-9195	ENSG00000163743	RCHY1	ring finger and CHY zinc finger domain containing 1
chr4	36291964	36292377	414	*	0.505406081	0.000417178	0.015206062	Exon (uc011bxy.3/401124, exon 2 of 9)	4	36285644	36346407	60764	1	401124	uc021xne.2	6320	ENSG00000197057	DTHD1	death domain containing 1
chr1	47185596	47186304	709	*	0.505320701	7.00E-06	0.001840555	Promoter (<=1kb)	1	47140831	47184736	43906	2	9813	uc001cqk.4	-860	ENSG00000159658	EFCAB14	EF-hand calcium binding domain 14
chr14	22398516	22398951	436	*	0.505251094	0.003848257	0.050868689	Intron (uc021rpa.1/uc021rpa.1, intron 2 of 2)	14	22133297	22134238	942	1	26686	uc010tmd.2	265219	ENSG00000221977	OR4E2	olfactory receptor family 4 subfamily E member 2 (gene/pseudogene)
chr18	61557199	61557780	582	*	0.505188807	0.000398954	0.014788041	Promoter (2-3kb)	18	61554939	61571124	16186	1	5055	uc010xeu.2	2260	ENSG00000197632	SERPINB2	serpin family B member 2
chr3	139083598	139084037	440	*	0.50514906	0.000798467	0.021419259	Intron (uc011bmv.2/9276, intron 15 of 21)	3	139062798	139075887	13090	1	56945	uc003etc.3	20800	ENSG00000175110	MRPS22	mitochondrial ribosomal protein S22
chr2	208183701	208184070	370	*	0.505137009	0.001534327	0.030096928	Distal Intergenic	2	207938862	208031970	93109	2	8609	uc031rrb.1	-151731	ENSG00000118263	KLF7	Kruppel like factor 7
chr2	74445624	74446182	559	*	0.505098984	0.000321063	0.013172527	3' UTR	2	74425690	74442424	16735	1	10797	uc010yrp.3	19934	ENSG00000065911	MTHFD2	methylenetetrahydrofolate dehydrogenase (NADP+ dependent) 2, methenyltetrahydrofolate cyclohydrolase
chr10	26756556	26757104	549	*	0.505092774	0.001314221	0.027985051	Intron (uc001isr.3/54518, intron 2 of 4)	10	26727266	26856732	129467	1	54518	uc001iss.3	29290	ENSG00000077420	APBB1IP	amyloid beta precursor protein binding family B member 1 interacting protein
chr10	94261260	94261937	678	*	0.505025433	0.000341161	0.01352525	Intron (uc001kia.3/3416, intron 11 of 24)	10	94211441	94257518	46078	2	3416	uc010qnp.2	-3742	ENSG00000119912	IDE	insulin degrading enzyme
chr8	59059640	59060545	906	*	0.504997593	0.000103952	0.007459541	3' UTR	8	58907113	59062277	155165	1	90362	uc003xtj.1	152527	ENSG00000169122	FAM110B	family with sequence similarity 110 member B
chr11	33566432	33566957	526	*	0.504971636	0.001053122	0.024834671	Promoter (2-3kb)	11	33563877	33695646	131770	1	25758	uc021qfs.1	2555	ENSG00000110427	KIAA1549L	KIAA1549 like
chr9	110657798	110658380	583	*	0.504959049	0.001502781	0.029765166	Distal Intergenic	9	110247133	110252047	4915	2	9314	uc031tes.1	-405751	ENSG00000136826	KLF4	Kruppel like factor 4
chr13	33823182	33823789	608	*	0.504625203	0.000164928	0.009367549	Intron (uc001uuw.3/90627, intron 1 of 13)	13	33851691	33855471	3781	1	100874241	uc031qlc.1	-27902	ENSG00000236581	STARD13-AS	STARD13 antisense RNA
chr2	111460744	111461605	862	*	0.504408095	0.000185808	0.009906676	Distal Intergenic	2	111418445	111435684	17240	2	699	uc002tgd.2	-25060	ENSG00000169679	BUB1	BUB1 mitotic checkpoint serine/threonine kinase
chr12	47937472	47938298	827	*	0.50435343	0.000110341	0.00772641	Distal Intergenic	12	48055715	48099844	44130	2	79657	uc001rpr.3	161546	ENSG00000005175	RPAP3	RNA polymerase II associated protein 3
chr6	11523468	11524318	851	*	0.504319543	8.29E-05	0.006673066	Distal Intergenic	6	11538460	11583757	45298	1	100113407	uc010jpa.4	-14142	ENSG00000205269	TMEM170B	transmembrane protein 170B
chr4	75594927	75595587	661	*	0.504127115	0.00045374	0.015879556	Distal Intergenic	4	75671448	75719882	48435	2	685	uc003hig.2	124295	ENSG00000174808	BTC	betacellulin
chr13	20885481	20886095	615	*	0.504118261	0.000153236	0.009072773	Distal Intergenic	13	20796101	20806534	10434	2	10804	uc001und.4	-78947	ENSG00000121742	GJB6	gap junction protein beta 6
chr22	22100242	22100816	575	*	0.504021658	3.56E-06	0.00127626	Distal Intergenic	22	22051826	22090071	38246	2	29799	uc002zvm.3	-10171	ENSG00000100027	YPEL1	yippee like 1
chr5	171241106	171241675	570	*	0.503996879	0.000227867	0.010937063	Distal Intergenic	5	171288556	171423991	135436	2	23291	uc011dey.1	182316	ENSG00000072803	FBXW11	F-box and WD repeat domain containing 11
chr11	22837120	22837856	737	*	0.503889512	0.001215204	0.026843594	Distal Intergenic	11	22843598	22851382	7785	2	258010	uc001mqp.4	13526	ENSG00000198168	SVIP	small VCP interacting protein
chr5	109274555	109275213	659	*	0.503867286	0.001234143	0.027152595	Distal Intergenic	5	109218883	109221200	2318	1	100289673	uc021ycf.2	55672	NA	LINC01848	long intergenic non-protein coding RNA 1848
chr8	70680583	70681464	882	*	0.503857344	0.001068498	0.025030149	Intron (uc010lzb.3/81796, intron 1 of 7)	8	70584568	70745404	160837	2	81796	uc010lzb.3	63940	ENSG00000137571	SLCO5A1	solute carrier organic anion transporter family member 5A1
chr3	11391749	11392351	603	*	0.503834903	0.000349866	0.013720009	Intron (uc003bwc.3/10533, intron 12 of 18)	3	11314010	11599139	285130	1	10533	uc011aum.2	77739	ENSG00000197548	ATG7	autophagy related 7
chr7	132693869	132694714	846	*	0.503730365	2.97E-06	0.001160717	Intron (uc003vre.3/54927, intron 3 of 7)	7	132469623	132766828	297206	2	54927	uc003vre.3	72114	ENSG00000106554	CHCHD3	coiled-coil-helix-coiled-coil-helix domain containing 3
chr5	95305383	95306068	686	*	0.503728135	0.000605489	0.018440473	Distal Intergenic	5	95220802	95297775	76974	2	22936	uc003klr.4	-7608	ENSG00000118985	ELL2	elongation factor for RNA polymerase II 2
chr12	92271164	92271681	518	*	0.503477659	0.00293802	0.04360999	Distal Intergenic	12	92378752	92535489	156738	2	256021	uc031qiz.1	263808	ENSG00000257242	LINC01619	long intergenic non-protein coding RNA 1619
chr3	34181761	34182366	606	*	0.503407555	0.00058661	0.018101323	Distal Intergenic	3	33870130	33911199	41070	1	10015	uc011axw.3	311631	ENSG00000170248	PDCD6IP	programmed cell death 6 interacting protein
chr17	49373148	49373780	633	*	0.503353815	0.001577385	0.030666597	Intron (uc002its.3/51096, intron 12 of 13)	17	49337897	49375292	37396	1	51096	uc002its.3	35251	ENSG00000011260	UTP18	UTP18 small subunit processome component
chr10	120859343	120859865	523	*	0.503282266	0.000618101	0.018627624	Distal Intergenic	10	120863611	120897376	33766	1	55855	uc001ldw.3	-3746	NA	DENND10P1	DENND10 pseudogene 1
chr14	31733273	31734199	927	*	0.503143651	3.44E-06	0.001256132	Distal Intergenic	14	31672281	31676915	4635	2	25831	uc001wre.3	-56358	ENSG00000092148	HECTD1	HECT domain E3 ubiquitin protein ligase 1
chr20	62651125	62651846	722	*	0.503132005	6.24E-05	0.005780001	Intron (uc002yho.3/24148, intron 12 of 20)	20	62665697	62671315	5619	1	284739	uc002yhq.3	-13851	ENSG00000196421	C20orf204	chromosome 20 open reading frame 204
chr2	174316813	174317437	625	*	0.503084101	0.000116962	0.007967702	Distal Intergenic	2	174219561	174233718	14158	1	83879	uc010zek.1	97252	ENSG00000144354	CDCA7	cell division cycle associated 7
chr3	180655198	180655718	521	*	0.503043886	0.000987388	0.024064889	Intron (uc003fkp.3/8087, intron 4 of 17)	3	180633247	180700539	67293	1	8087	uc011bql.2	21951	ENSG00000114416	FXR1	FMR1 autosomal homolog 1
chr4	68545428	68545922	495	*	0.502863388	0.001882603	0.034007226	Intron (uc003hdg.4/55236, intron 4 of 32)	4	68481479	68566889	85411	2	55236	uc003hdg.4	20967	ENSG00000033178	UBA6	ubiquitin like modifier activating enzyme 6
chr5	170397008	170397464	457	*	0.502768181	0.00450309	0.055497232	Intron (uc003max.2/64901, intron 14 of 17)	5	170288896	170727019	438124	1	64901	uc003mba.3	108112	ENSG00000204764	RANBP17	RAN binding protein 17
chr7	156820218	156821126	909	*	0.502718345	0.000237483	0.011165249	Distal Intergenic	7	156803551	156809118	5568	1	645249	uc003wne.2	16667	ENSG00000243479	MNX1-AS1	MNX1 antisense RNA 1 (head to head)
chr6	83906356	83906908	553	*	0.50263521	0.000165915	0.009402897	Promoter (2-3kb)	6	83874593	83903655	29063	2	5238	uc011dyz.2	-2701	ENSG00000013375	PGM3	phosphoglucomutase 3
chr2	170494306	170494796	491	*	0.502595896	0.005079587	0.059023108	Distal Intergenic	2	170460152	170494254	34103	1	9360	uc002ufd.3	34154	ENSG00000138398	PPIG	peptidylprolyl isomerase G
chr4	54820784	54821347	564	*	0.502549149	0.005246238	0.060096065	Intron (uc003haa.3/5156, intron 12 of 23)	4	54851666	54853449	1784	2	402176	uc011bzv.3	32102	NA	RPL21P44	ribosomal protein L21 pseudogene 44
chr11	131277663	131278293	631	*	0.502506646	0.000428391	0.015413468	Intron (uc001qgm.3/50863, intron 1 of 7)	11	131240371	132206716	966346	1	50863	uc010sci.2	37292	ENSG00000182667	NTM	neurotrimin
chr14	56749780	56750225	446	*	0.502472032	0.000448946	0.015792099	Intron (uc001xch.3/57161, intron 3 of 5)	14	56585093	56768031	182939	1	57161	uc001xch.3	164687	ENSG00000139946	PELI2	pellino E3 ubiquitin protein ligase family member 2
chr10	60159086	60159501	416	*	0.50247043	0.002221426	0.037342409	Distal Intergenic	10	60144903	60158990	14088	1	7019	uc031pve.1	14183	ENSG00000108064	TFAM	transcription factor A, mitochondrial
chr1	226352103	226352570	468	*	0.502223627	0.00018946	0.009935248	Exon (uc001hpy.3/64746, exon 3 of 8)	1	226332380	226374423	42044	2	64746	uc001hpy.3	21853	ENSG00000182827	ACBD3	acyl-CoA binding domain containing 3
chr11	44985964	44986758	795	*	0.501967916	0.00075256	0.020688744	Distal Intergenic	11	44995453	44999578	4126	1	221122	uc001myn.3	-8695	ENSG00000254654	LINC02685	long intergenic non-protein coding RNA 2685
chr6	8889449	8890202	754	*	0.501964362	0.00039314	0.014710033	Distal Intergenic	6	8652442	8654080	1639	1	728655	uc003myf.4	237007	NA	HULC	hepatocellular carcinoma up-regulated long non-coding RNA
chr11	14631302	14632159	858	*	0.501930144	0.00031817	0.013109821	Intron (uc001mll.3/5682, intron 2 of 10)	11	14526422	14665180	138759	2	5682	uc001mll.3	33021	ENSG00000129084	PSMA1	proteasome 20S subunit alpha 1
chr6	53306722	53307253	532	*	0.501927102	6.58E-05	0.005968036	Distal Intergenic	6	53362140	53375246	13107	2	2729	uc003pbv.1	67993	ENSG00000001084	GCLC	glutamate-cysteine ligase catalytic subunit
chr17	9998068	9998676	609	*	0.501912979	0.002097144	0.03624789	Intron (uc010coh.1/8522, intron 1 of 14)	17	9813926	10017870	203945	2	8522	uc010coh.1	19194	ENSG00000007237	GAS7	growth arrest specific 7
chr15	64614454	64614766	313	*	0.501863356	0.001191059	0.02664714	Intron (uc002anf.3/53944, intron 1 of 11)	15	64457932	64592922	134991	2	53944	uc002ang.1	-21532	ENSG00000169118	CSNK1G1	casein kinase 1 gamma 1
chr2	100014768	100015167	400	*	0.501863218	0.000794303	0.021326343	Intron (uc002tab.3/9669, intron 22 of 23)	2	100010723	100016728	6006	1	9669	uc010yvq.2	4045	ENSG00000158417	EIF5B	eukaryotic translation initiation factor 5B
chr1	223611360	223611810	451	*	0.501684205	0.004431209	0.05494335	Distal Intergenic	1	223566715	223568812	2098	1	164127	uc001hoa.2	44645	ENSG00000178395	CCDC185	coiled-coil domain containing 185
chr1	100382426	100383168	743	*	0.50167747	0.000434096	0.015498462	Intron (uc001dsi.1/178, intron 33 of 33)	1	100435345	100492534	57190	1	23443	uc001dsp.2	-52177	ENSG00000117620	SLC35A3	solute carrier family 35 member A3
chr6	97613148	97613610	463	*	0.501307015	0.001368353	0.028431034	Exon (uc011eaf.2/253714, exon 19 of 23)	6	97590037	97730429	140393	2	253714	uc011eaf.2	116819	ENSG00000146263	MMS22L	MMS22 like, DNA repair protein
chr1	91995476	91995888	413	*	0.501054587	0.002437601	0.039409203	Distal Intergenic	1	91980376	91991321	10946	1	8317	uc009wdd.3	15100	ENSG00000097046	CDC7	cell division cycle 7
chr10	15813113	15813595	483	*	0.500994744	0.000103263	0.007455635	Distal Intergenic	10	15559088	15761770	202683	2	8516	uc010qcb.1	-51343	ENSG00000077943	ITGA8	integrin subunit alpha 8
chr12	129379860	129380625	766	*	0.500956645	7.61E-05	0.006410877	Intron (uc001uhx.1/144423, intron 3 of 7)	12	129348681	129469509	120829	1	144423	uc010tbh.1	31179	ENSG00000151948	GLT1D1	glycosyltransferase 1 domain containing 1
chr8	66650653	66651466	814	*	0.500648072	0.00023315	0.011057235	Intron (uc003xvp.3/5150, intron 6 of 12)	8	66626569	66701329	74761	2	5150	uc003xvp.3	49863	ENSG00000205268	PDE7A	phosphodiesterase 7A
chr1	200820014	200820681	668	*	0.500637427	0.000744353	0.020589982	Intron (uc001gvk.3/23271, intron 11 of 16)	1	200842083	200843306	1224	1	2848	uc001gvn.2	-21402	ENSG00000170128	GPR25	G protein-coupled receptor 25
chr9	6072870	6073851	982	*	0.500612114	2.31E-07	0.000305445	Distal Intergenic	9	6011019	6015640	4622	2	26953	uc011lmf.2	-57230	ENSG00000137040	RANBP6	RAN binding protein 6
chr12	12287607	12288019	413	*	0.500607243	0.002908548	0.043382031	Intron (uc001raf.1/79370, intron 4 of 6)	12	12264886	12264967	82	1	100302285	uc021qvi.1	22721	ENSG00000284378	MIR1244-1	microRNA 1244-1
chr3	53736591	53737362	772	*	0.500539838	0.000652717	0.019189259	Exon (uc003dgu.5/776, exon 9 of 49)	3	53765104	53834445	69342	1	776	uc003dgx.1	-27742	ENSG00000157388	CACNA1D	calcium voltage-gated channel subunit alpha1 D
chr1	36435005	36435519	515	*	0.500502492	0.000729109	0.020371956	Intron (uc001bzn.1/192669, intron 4 of 6)	1	36396683	36522063	125381	1	192669	uc001bzq.3	38322	ENSG00000126070	AGO3	argonaute RISC catalytic component 3
chr19	33857763	33858252	490	*	0.50037328	0.003609207	0.048897373	Distal Intergenic	19	33864575	33873592	9018	1	1054	uc002nup.3	-6323	ENSG00000153879	CEBPG	CCAAT enhancer binding protein gamma
chr1	232927667	232928511	845	*	0.500357769	0.002655511	0.041327126	Distal Intergenic	1	232940638	232946092	5455	1	54627	uc001hvh.2	-12127	ENSG00000212916	MAP10	microtubule associated protein 10
chr13	41126992	41127498	507	*	0.500325821	0.000178925	0.009741282	Intron (uc010acc.1/2308, intron 2 of 2)	13	41048131	41185264	137134	2	2308	uc010acc.1	57766	ENSG00000150907	FOXO1	forkhead box O1
chr8	53562093	53562864	772	*	0.500269412	0.000336295	0.013449718	Intron (uc003xre.4/9821, intron 15 of 23)	8	53535018	53627026	92009	2	9821	uc003xre.4	64162	ENSG00000023287	RB1CC1	RB1 inducible coiled-coil 1
chr11	34976306	34976969	664	*	0.500257225	0.000683273	0.019748462	Intron (uc001mvt.3/8050, intron 3 of 10)	11	34963384	34963467	84	1	100616437	uc021qfv.1	12922	ENSG00000251862	MIR1343	microRNA 1343
chr2	30726647	30727060	414	*	0.500231104	9.83E-05	0.007259834	Intron (uc002rnj.3/253558, intron 2 of 6)	2	30670137	30867091	196955	1	253558	uc010ymq.2	56510	ENSG00000172954	LCLAT1	lysocardiolipin acyltransferase 1
chr8	100387426	100387927	502	*	0.500178915	0.000487909	0.016606723	Intron (uc003yiu.1/157680, intron 19 of 28)	8	100548864	100548958	95	2	693184	uc022azd.1	161031	ENSG00000207804	MIR599	microRNA 599
chr11	110262629	110263286	658	*	0.500061154	0.000489634	0.016628576	Intron (uc001pkv.1/uc001pkv.1, intron 5 of 5)	11	110300661	110335608	34948	1	2230	uc001pkx.3	-37375	ENSG00000137714	FDX1	ferredoxin 1
chr6	73722834	73723276	443	*	-0.500276315	0.000983421	0.024030457	Intron (uc003pgj.4/56479, intron 2 of 8)	6	73677410	73677476	67	2	100423005	uc021zbr.1	-45358	ENSG00000266180	MIR4282	microRNA 4282
chr12	31390027	31390493	467	*	-0.500379402	1.83E-06	0.000892459	Distal Intergenic	12	31433520	31451455	17936	2	58516	uc001rkc.3	60962	ENSG00000139146	SINHCAF	SIN3-HDAC complex associated factor
chr10	81341855	81342301	447	*	-0.500648164	0.002914853	0.043429388	Distal Intergenic	10	81319068	81320163	1096	2	729238	uc001kam.2	-21692	ENSG00000185303	SFTPA2	surfactant protein A2
chr9	111649933	111650341	409	*	-0.500903232	0.000579762	0.018065044	Intron (uc004bdk.3/8518, intron 2 of 9)	9	111629800	111654722	24923	2	8518	uc004bdk.3	4381	ENSG00000070061	ELP1	elongator complex protein 1
chr12	10924827	10925343	517	*	-0.502380036	0.000695941	0.019918486	Distal Intergenic	12	10954131	10955226	1096	2	50837	uc001qyv.3	29883	ENSG00000121377	TAS2R7	taste 2 receptor member 7
chr13	43570937	43571630	694	*	-0.502877137	0.000126898	0.008360094	Distal Intergenic	13	43460524	43566407	105884	2	94240	uc001uyx.2	-4530	ENSG00000133106	EPSTI1	epithelial stromal interaction 1
chr12	128540638	128541552	915	*	-0.503196759	0.000244046	0.011298759	Distal Intergenic	12	128399955	128436097	36143	1	100862680	uc031qkg.1	140683	ENSG00000256193	LINC00507	long intergenic non-protein coding RNA 507
chr6	158536236	158537107	872	*	-0.50423116	7.04E-06	0.001840601	Intron (uc003qrb.2/84947, intron 15 of 17)	6	158566952	158580331	13380	2	84947	uc031sqr.1	43224	ENSG00000122335	SERAC1	serine active site containing 1
chr4	75405015	75405574	560	*	-0.504723323	0.000272826	0.012055739	Intron (uc021xpc.1/374, intron 6 of 11)	4	75310853	75490485	179633	1	374	uc021xpc.1	94162	ENSG00000109321	AREG	amphiregulin
chr15	84539999	84540398	400	*	-0.505196728	0.00031039	0.012914883	Intron (uc010bmt.1/57188, intron 9 of 26)	15	84748939	84795353	46415	1	648809	uc021stg.1	-208541	NA	EFL1P1	elongation factor like GTPase 1 pseudogene 1
chr1	245848320	245848755	436	*	-0.505958771	3.09E-05	0.003990114	Exon (uc001ibf.1/55083, exon 12 of 15)	1	245809394	245852109	42716	1	55083	uc001ibh.1	38926	ENSG00000162849	KIF26B	kinesin family member 26B
chr7	45638781	45639461	681	*	-0.506093017	0.000388826	0.014614298	Intron (uc003tnd.3/107, intron 3 of 9)	7	45614125	45762714	148590	1	107	uc003tne.4	24656	ENSG00000164742	ADCY1	adenylate cyclase 1
chr7	128981317	128981788	472	*	-0.506363358	6.02E-05	0.005695471	Intron (uc003vot.3/23382, intron 1 of 16)	7	129007964	129070052	62089	1	23382	uc003vov.3	-26176	ENSG00000158467	AHCYL2	adenosylhomocysteinase like 2
chr5	9394342	9394845	504	*	-0.506746358	0.000205443	0.010424718	Intron (uc003jek.2/9037, intron 2 of 22)	5	9035138	9546233	511096	2	9037	uc003jek.2	151388	ENSG00000112902	SEMA5A	semaphorin 5A
chr15	29640378	29640890	513	*	-0.507014336	2.17E-05	0.0032692	Intron (uc010azk.1/23359, intron 2 of 10)	15	29560353	29562020	1668	2	56160	uc001zco.3	-78358	ENSG00000185115	NSMCE3	NSE3 homolog, SMC5-SMC6 complex component
chr6	27164907	27165666	760	*	-0.507254512	6.65E-05	0.006000002	Distal Intergenic	6	27115405	27115467	63	1	100422934	uc021yoz.1	49502	ENSG00000265565	MIR3143	microRNA 3143
chr3	98447755	98448392	638	*	-0.507333263	4.68E-05	0.004967765	Promoter (2-3kb)	3	98451080	98514689	63610	1	10402	uc003dsy.4	-2688	ENSG00000064225	ST3GAL6	ST3 beta-galactoside alpha-2,3-sialyltransferase 6
chr14	74859809	74860610	802	*	-0.507415352	0.000241606	0.011241132	Distal Intergenic	14	74872596	74892805	20210	2	646658	uc001xpx.2	32195	ENSG00000183379	SYNDIG1L	synapse differentiation inducing 1 like
chr10	54448792	54449247	456	*	-0.507583879	0.002212662	0.037300938	Distal Intergenic	10	54525140	54531460	6321	2	4153	uc001jjt.3	82213	ENSG00000165471	MBL2	mannose binding lectin 2
chr8	24509994	24510655	662	*	-0.507647392	0.00012936	0.008407941	Distal Intergenic	8	24333417	24384483	51067	1	8756	uc003xec.3	176577	ENSG00000069206	ADAM7	ADAM metallopeptidase domain 7
chr3	156179172	156179836	665	*	-0.508972162	0.00053783	0.017471941	Intron (uc003far.2/7881, intron 5 of 13)	3	156175027	156256927	81901	1	7881	uc011boo.1	4145	ENSG00000169282	KCNAB1	potassium voltage-gated channel subfamily A member regulatory beta subunit 1
chr2	202930870	202931394	525	*	-0.510180291	0.000485323	0.016554624	Distal Intergenic	2	202937978	202974512	36535	1	100652824	uc010ftp.2	-6584	ENSG00000182329	KIAA2012	KIAA2012
chr4	99743164	99743679	516	*	-0.510200315	0.000734975	0.020467239	Distal Intergenic	4	99799607	99850243	50637	2	1977	uc011cea.1	106564	ENSG00000151247	EIF4E	eukaryotic translation initiation factor 4E
chr5	99910903	99911408	506	*	-0.510227595	0.000370355	0.014199337	Intron (uc003knj.1/345757, intron 2 of 2)	5	99871124	99922440	51317	1	345757	uc003knj.1	39779	ENSG00000174132	FAM174A	family with sequence similarity 174 member A
chr10	25127812	25128320	509	*	-0.510946089	0.00216446	0.036884121	Distal Intergenic	10	25137554	25241533	103980	2	56952	uc001ise.1	113213	ENSG00000099256	PRTFDC1	phosphoribosyl transferase domain containing 1
chr12	55384738	55385292	555	*	-0.511280119	0.000161394	0.009299459	Distal Intergenic	12	55342087	55378530	36444	2	9840	uc010spd.2	-6208	ENSG00000135426	TESPA1	thymocyte expressed, positive selection associated 1
chr15	96476460	96477447	988	*	-0.511906756	4.13E-07	0.000431726	Distal Intergenic	15	96869157	96883492	14336	1	7026	uc002btp.3	-391710	ENSG00000185551	NR2F2	nuclear receptor subfamily 2 group F member 2
chr1	160098337	160099075	739	*	-0.512009033	7.55E-05	0.006368123	Promoter (<=1kb)	1	160098186	160100387	2202	1	477	uc009wtg.1	151	ENSG00000018625	ATP1A2	ATPase Na+/K+ transporting subunit alpha 2
chr11	69089019	69089664	646	*	-0.512176585	7.96E-05	0.006562955	Intron (uc001oox.3/26579, intron 1 of 1)	11	69061622	69156450	94829	1	26579	uc001oox.3	27397	ENSG00000172927	MYEOV	myeloma overexpressed
chr2	180192812	180193190	379	*	-0.512986871	0.003492924	0.048027449	Distal Intergenic	2	179966419	180129350	162932	2	91404	uc002uni.4	-63462	ENSG00000187231	SESTD1	SEC14 and spectrin domain containing 1
chr2	112647766	112648198	433	*	-0.513369117	4.29E-05	0.004719553	Distal Intergenic	2	112525214	112641741	116528	2	64682	uc002thi.3	-6025	ENSG00000153107	ANAPC1	anaphase promoting complex subunit 1
chr2	148585173	148585753	581	*	-0.513907064	0.001870446	0.033885223	Distal Intergenic	2	148602086	148688393	86308	1	92	uc002twg.3	-16333	ENSG00000121989	ACVR2A	activin A receptor type 2A
chr11	27792209	27792919	711	*	-0.514001665	0.00026386	0.011854409	Distal Intergenic	11	27676442	27743605	67164	2	627	uc001msa.3	-48604	ENSG00000176697	BDNF	brain derived neurotrophic factor
chr11	60855982	60856435	454	*	-0.515527996	0.000113829	0.007856739	Distal Intergenic	11	60869930	60895323	25394	1	921	uc009ynk.3	-13495	ENSG00000110448	CD5	CD5 molecule
chr15	39811475	39811965	491	*	-0.516167296	0.000891858	0.022795761	Distal Intergenic	15	39873280	39889668	16389	1	7057	uc001zkh.3	-61315	ENSG00000137801	THBS1	thrombospondin 1
chr21	43598894	43599337	444	*	-0.51645185	0.000250799	0.011499642	Distal Intergenic	21	43619799	43717354	97556	1	9619	uc002zam.3	-20462	ENSG00000160179	ABCG1	ATP binding cassette subfamily G member 1
chr10	18453531	18453994	464	*	-0.516461463	0.001106965	0.025524495	Intron (uc001ipr.2/783, intron 2 of 13)	10	18429742	18830688	400947	1	783	uc009xka.2	23789	ENSG00000165995	CACNB2	calcium voltage-gated channel auxiliary subunit beta 2
chr17	70694838	70695304	467	*	-0.516933364	1.33E-05	0.002513899	Intron (uc002jja.3/201266, intron 7 of 9)	17	70594180	70636611	42432	2	400619	uc021ucl.1	-58227	ENSG00000227036	LINC00511	long intergenic non-protein coding RNA 511
chr7	30962182	30962731	550	*	-0.517017623	3.73E-06	0.001309474	Promoter (1-2kb)	7	30961119	30965131	4013	1	358	uc022abh.1	1063	ENSG00000240583	AQP1	aquaporin 1 (Colton blood group)
chr8	99855607	99856102	496	*	-0.518901228	0.000509552	0.016994911	Intron (uc003yio.4/6788, intron 3 of 12)	8	99466859	99837909	371051	2	6788	uc010mbm.2	-17698	ENSG00000104375	STK3	serine/threonine kinase 3
chr12	68406800	68407221	422	*	-0.519946477	0.002868003	0.043046129	Intron (uc001stv.1/uc001stv.1, intron 3 of 3)	12	68548550	68553521	4972	2	3458	uc001stw.1	146300	ENSG00000111537	IFNG	interferon gamma
chr3	39609483	39610095	613	*	-0.520501293	0.00039679	0.01476032	Distal Intergenic	3	39563761	39570988	7228	1	4336	uc003cjz.4	45722	ENSG00000168314	MOBP	myelin associated oligodendrocyte basic protein
chr11	3636246	3636721	476	*	-0.520942845	4.46E-06	0.001457787	Distal Intergenic	11	3647690	3658789	11100	1	7221	uc001lya.2	-10969	ENSG00000182048	TRPC2	transient receptor potential cation channel subfamily C member 2 (pseudogene)
chr1	39365289	39365736	448	*	-0.521561366	0.00080871	0.021564917	Intron (uc010oin.1/54933, intron 3 of 5)	1	39328162	39347298	19137	2	100527950	uc021olq.1	-17991	NA	GJA9-MYCBP	GJA9-MYCBP readthrough
chr3	105367675	105368437	763	*	-0.524663069	7.25E-05	0.006264669	Distal Intergenic	3	105377109	105400974	23866	2	868	uc003dwa.3	32537	ENSG00000114423	CBLB	Cbl proto-oncogene B
chr11	133865033	133865613	581	*	-0.525182816	8.29E-05	0.006673066	Distal Intergenic	11	133902167	133911236	9070	1	100128239	uc001qha.1	-36554	ENSG00000204241	LINC02731	long intergenic non-protein coding RNA 2731
chr2	222034259	222034869	611	*	-0.525218345	0.001350034	0.028289435	Distal Intergenic	2	222289929	222437001	147073	2	2043	uc002vmr.2	402132	ENSG00000116106	EPHA4	EPH receptor A4
chr4	91006143	91006825	683	*	-0.526125297	0.000187478	0.009932329	Distal Intergenic	4	91048684	91234244	185561	1	401145	uc003hsu.3	-41859	ENSG00000184305	CCSER1	coiled-coil serine rich protein 1
chr5	4230865	4231826	962	*	-0.526312335	0.000177899	0.009719054	Distal Intergenic	5	3596168	3601517	5350	1	79192	uc003jde.3	634697	ENSG00000170549	IRX1	iroquois homeobox 1
chr2	122768783	122769340	558	*	-0.526366609	0.001506902	0.029800749	Distal Intergenic	2	122513121	122525428	12308	1	7247	uc031rox.1	255662	ENSG00000211460	TSN	translin
chr1	26627980	26628428	449	*	-0.526805886	2.92E-05	0.003865608	5' UTR	1	26608773	26633195	24423	2	91544	uc001blw.3	4767	ENSG00000158062	UBXN11	UBX domain protein 11
chr10	122552907	122553737	831	*	-0.527135166	0.000143061	0.008796559	Intron (uc001lfb.1/283089, intron 1 of 2)	10	122610687	122666367	55681	1	55717	uc010qte.2	-56950	ENSG00000120008	WDR11	WD repeat domain 11
chr11	117376011	117376372	362	*	-0.527461002	3.25E-05	0.004080573	Exon (uc001prh.1/57453, exon 9 of 33)	11	117255313	117281417	26105	1	22897	uc001prg.1	120698	ENSG00000110274	CEP164	centrosomal protein 164
chr4	105756173	105756728	556	*	-0.529722632	0.000212063	0.010561252	Distal Intergenic	4	106067032	106163928	96897	1	54790	uc021xqk.1	-310304	ENSG00000168769	TET2	tet methylcytosine dioxygenase 2
chr2	122890910	122891496	587	*	-0.531212573	0.000109016	0.00767659	Distal Intergenic	2	122513121	122525428	12308	1	7247	uc031rox.1	377789	ENSG00000211460	TSN	translin
chr15	29334926	29335628	703	*	-0.531538521	1.40E-06	0.000768268	Intron (uc010uas.1/321, intron 4 of 4)	15	29362861	29394962	32102	1	321	uc001zcm.1	-27233	ENSG00000034053	APBA2	amyloid beta precursor protein binding family A member 2
chr12	122931877	122932532	656	*	-0.532070054	0.001454701	0.029342601	Distal Intergenic	12	122755981	122907116	151136	2	6249	uc001uci.1	-24761	ENSG00000130779	CLIP1	CAP-Gly domain containing linker protein 1
chr5	76626909	76627461	553	*	-0.532089099	1.55E-05	0.002672173	Exon (uc003kfa.3/8622, exon 5 of 22)	5	76506706	76724080	217375	1	8622	uc003kfe.3	120203	ENSG00000113231	PDE8B	phosphodiesterase 8B
chr4	3078627	3079250	624	*	-0.535897936	2.42E-06	0.00107398	Promoter (2-3kb)	4	3076408	3245687	169280	1	3064	uc021xkv.1	2219	ENSG00000197386	HTT	huntingtin
chr6	21321311	21321772	462	*	-0.537042928	4.42E-05	0.004796248	Distal Intergenic	6	21065279	21232634	167356	1	54901	uc003ndf.2	256032	ENSG00000145996	CDKAL1	CDK5 regulatory subunit associated protein 1 like 1
chr4	79328842	79329593	752	*	-0.53727326	5.08E-06	0.001537632	Exon (uc003hkw.3/80144, exon 31 of 42)	4	79340103	79367787	27685	1	80144	uc010ijj.2	-10510	ENSG00000138759	FRAS1	Fraser extracellular matrix complex subunit 1
chr13	43702608	43703387	780	*	-0.541826885	4.27E-05	0.004694551	Distal Intergenic	13	43597362	43683306	85945	1	29103	uc001uyy.3	105246	ENSG00000120675	DNAJC15	DnaJ heat shock protein family (Hsp40) member C15
chr10	71585183	71586173	991	*	-0.542003595	4.37E-06	0.001437165	Intron (uc001jqk.2/1305, intron 3 of 38)	10	71561644	71718904	157261	1	1305	uc021psh.1	23539	ENSG00000197467	COL13A1	collagen type XIII alpha 1 chain
chr6	158908440	158908946	507	*	-0.542585202	8.20E-05	0.006657416	Intron (uc003qrf.3/56995, intron 8 of 13)	6	158957468	159049522	92055	1	57583	uc010kjr.1	-48522	ENSG00000146433	TMEM181	transmembrane protein 181
chr5	170728801	170729256	456	*	-0.543149262	0.000128749	0.008407941	Distal Intergenic	5	170736288	170739138	2851	1	30012	uc003mbf.3	-7032	ENSG00000164438	TLX3	T cell leukemia homeobox 3
chr10	45673185	45673744	560	*	-0.548168485	3.29E-05	0.004092195	Intron (uc001jcb.1/338579, intron 8 of 8)	10	45659462	45659536	75	1	100422988	uc021ppp.1	13723	ENSG00000263476	MIR3156-1	microRNA 3156-1
chr5	145969406	145969843	438	*	-0.551347284	0.000534976	0.017468969	3' UTR	5	145894417	145895676	1260	2	134391	uc003lod.1	-73730	ENSG00000173250	GPR151	G protein-coupled receptor 151
chr3	52948362	52948903	542	*	-0.552292337	1.65E-06	0.000860942	Intron (uc010hmr.3/51460, intron 11 of 16)	3	52870772	52931597	60826	2	375346	uc003dgd.3	-16765	ENSG00000213533	STIMATE	STIM activating enhancer
chr2	66909530	66910034	505	*	-0.552521999	5.92E-05	0.005655634	Distal Intergenic	2	66667263	66796277	129015	1	4211	uc002sdw.1	242267	ENSG00000143995	MEIS1	Meis homeobox 1
chr15	75620335	75620938	604	*	-0.552633692	2.46E-05	0.003523588	Distal Intergenic	15	75628374	75632219	3846	1	54939	uc010umf.1	-7436	ENSG00000140365	COMMD4	COMM domain containing 4
chr2	109579518	109580178	661	*	-0.554981621	5.21E-06	0.001550579	Intron (uc002teq.4/10913, intron 1 of 11)	2	109510927	109605828	94902	2	10913	uc002teq.4	25650	ENSG00000135960	EDAR	ectodysplasin A receptor
chr4	144620176	144621158	983	*	-0.555103534	1.93E-05	0.003070409	Promoter (<=1kb)	4	144498561	144621828	123268	2	166752	uc021xsj.1	670	ENSG00000183090	FREM3	FRAS1 related extracellular matrix 3
chr4	102880834	102881256	423	*	-0.555787785	1.96E-05	0.003085912	Intron (uc003hvx.4/55024, intron 11 of 20)	4	102734983	102995969	260987	1	55024	uc003hvz.4	145851	ENSG00000153064	BANK1	B cell scaffold protein with ankyrin repeats 1
chr2	98772569	98773095	527	*	-0.562425563	0.000120709	0.008105611	Intron (uc010yvh.2/200403, intron 6 of 12)	2	98765958	98928495	162538	1	200403	uc010yvi.1	6611	ENSG00000168658	VWA3B	von Willebrand factor A domain containing 3B
chr12	5534037	5534491	455	*	-0.562855273	3.63E-05	0.004301666	Distal Intergenic	12	5541280	5604465	63186	1	4908	uc001qnk.4	-6789	ENSG00000185652	NTF3	neurotrophin 3
chr15	82076311	82076963	653	*	-0.569543511	0.000371897	0.014228709	Distal Intergenic	15	82334119	82338484	4366	2	84206	uc002bgq.2	261521	ENSG00000183496	MEX3B	mex-3 RNA binding family member B
chr5	86379338	86379757	420	*	-0.578636136	0.000799275	0.021422618	Distal Intergenic	5	86410696	86410771	76	2	100422887	uc021ybb.1	31014	ENSG00000265919	MIR4280	microRNA 4280
chr17	1142196	1142942	747	*	-0.579348322	1.44E-05	0.002591651	Distal Intergenic	17	1173858	1174565	708	1	727857	uc021tnd.1	-30916	ENSG00000205899	BHLHA9	basic helix-loop-helix family member a9
chr1	158109858	158110424	567	*	-0.57935594	0.000519464	0.017159271	Promoter (<=1kb)	1	158101834	158110430	8597	2	646268	uc001frq.3	6	ENSG00000231666	LINC01704	long intergenic non-protein coding RNA 1704
chr3	193194498	193194996	499	*	-0.579629288	0.002667813	0.041404839	Intron (uc003ftd.3/84239, intron 8 of 29)	3	193176393	193188782	12390	2	84239	uc003ftf.4	-5716	ENSG00000127249	ATP13A4	ATPase 13A4
chr11	27759583	27760383	801	*	-0.587748639	0.000485139	0.016554362	Distal Intergenic	11	27676442	27743605	67164	2	627	uc001msa.3	-15978	ENSG00000176697	BDNF	brain derived neurotrophic factor
chr11	64933122	64933801	680	*	-0.588417896	2.79E-06	0.001128459	Distal Intergenic	11	64937707	64940688	2982	1	387778	uc010rnz.2	-3906	ENSG00000204710	SPDYC	speedy/RINGO cell cycle regulator family member C
chr3	158568435	158568853	419	*	-0.595282411	0.000111137	0.007756234	Distal Intergenic	3	158519715	158547508	27794	1	64747	uc011bow.2	48720	ENSG00000118855	MFSD1	major facilitator superfamily domain containing 1
chr20	36173397	36173778	382	*	-0.605326545	0.00022532	0.010883761	Distal Intergenic	20	36145819	36156333	10515	2	10904	uc002xhc.3	-17064	ENSG00000166619	BLCAP	BLCAP apoptosis inducing factor
chr3	136791001	136791562	562	*	-0.625449072	0.000147714	0.00889922	Distal Intergenic	3	136699308	136729926	30619	1	53833	uc010hud.2	91693	ENSG00000174564	IL20RB	interleukin 20 receptor subunit beta
chr9	71293531	71294001	471	*	-0.627566216	0.00010232	0.00740519	Distal Intergenic	9	71320330	71624092	303763	1	8395	uc004agu.4	-26329	ENSG00000107242	PIP5K1B	phosphatidylinositol-4-phosphate 5-kinase type 1 beta
chr15	39051452	39051918	467	*	-0.628873249	7.45E-05	0.006339792	Distal Intergenic	15	38988799	38992239	3441	1	400359	uc001zkf.1	62653	NA	LINC02694	long intergenic non-protein coding RNA 2694
chr7	147054192	147055044	853	*	-0.629899812	0.000408296	0.015009734	Intron (uc003weu.2/26047, intron 9 of 23)	7	147075109	147075213	105	2	100313895	uc022aop.1	20169	ENSG00000221442	MIR548F4	microRNA 548f-4
chr13	71424468	71424995	528	*	-0.672041472	0.000982878	0.024030457	Distal Intergenic	13	71589273	71742549	153277	1	100885781	uc031qmd.1	-164278	ENSG00000226846	LINC00348	long intergenic non-protein coding RNA 348
chr1	30740901	30741578	678	*	-0.680387926	1.96E-05	0.003085912	Distal Intergenic	1	31191619	31199593	7975	1	100129196	uc001bsb.1	-450041	ENSG00000186056	MATN1-AS1	MATN1 antisense RNA 1
chr17	20659686	20660392	707	*	-0.680525628	1.28E-06	0.000746239	Distal Intergenic	17	20615759	20641178	25420	1	100287072	uc031qzh.1	43927	NA	LOC100287072	ribosomal protein S6 kinase B1 pseudogene
chr18	22981600	22982056	457	*	-0.737996704	2.26E-05	0.003360014	Distal Intergenic	18	22641888	22932214	290327	2	25925	uc010xbe.1	-49386	ENSG00000198795	ZNF521	zinc finger protein 521
